# Supplementary material for: Human eIF2A has a minimal role in translation initiation and in uORF-mediated translational control in HeLa cells
Source: eLife journal article supplement (doi:10.7554/elife.105311), 2025-01-17

Fig1 Suppl. Figure 1

the membrane was stripped  
and re-blotted with anti-CMYC  
and ATF-4 antibodies

the membrane was stripped  
and re-blotted with  
anti-tubulin antibodies

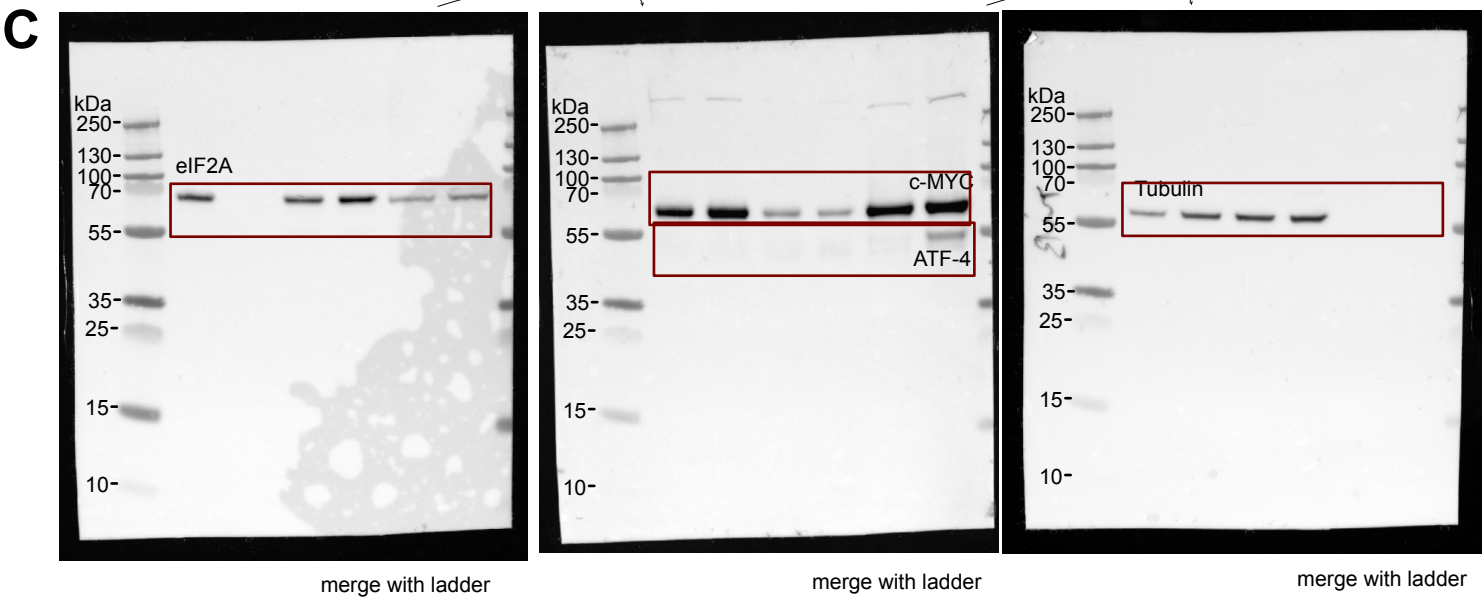

**F** same samples were run in a parallel:

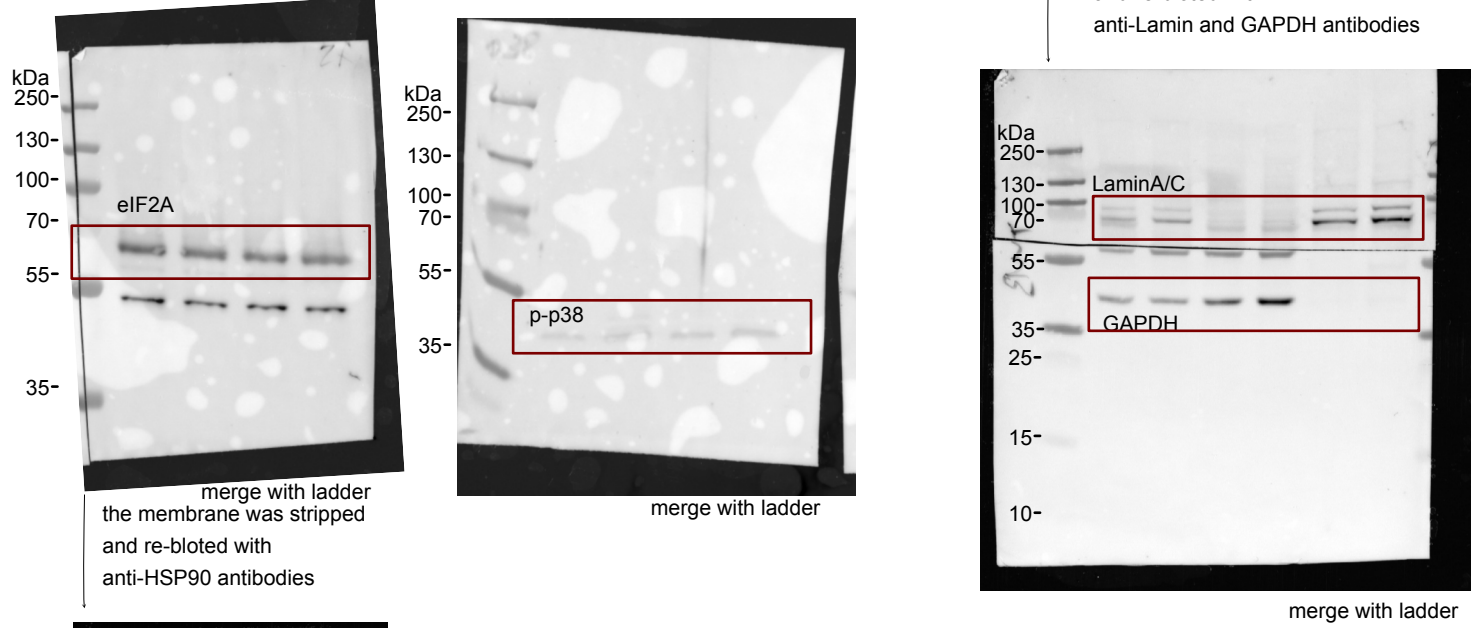

the membrane was stripped cut  
and re-blotted with  
anti-Lamin and GAPDH antibodies

merge with ladder  
the membrane was stripped  
and re-blotted with  
anti-HSP90 antibodies

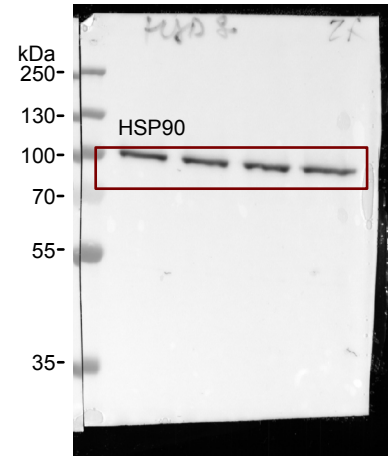

Supplement: fig1-figsupp1-data1 [file elife-105311-fig1-figsupp1-data1-v1.pdf]
