# Supplementary material for: Human eIF2A has a minimal role in translation initiation and in uORF-mediated translational control in HeLa cells
Source: eLife journal article supplement (doi:10.7554/elife.105311), 2025-01-17

# Figure 2

same samples were run in a parallel and blotted for the different proteins:

B

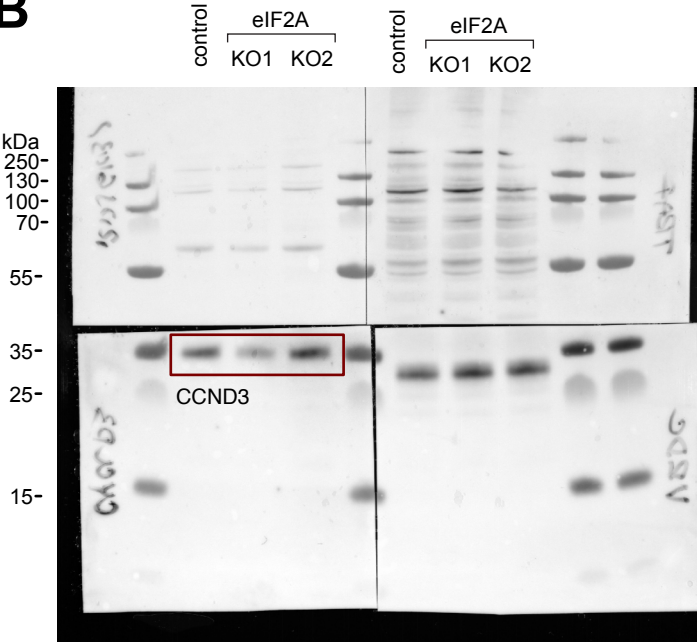

the membrane was stripped and re-blotted with anti-eIF2A

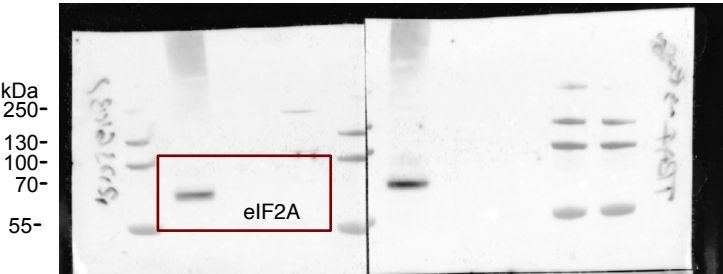

the membrane was stripped and re-blotted with anti-tubulin

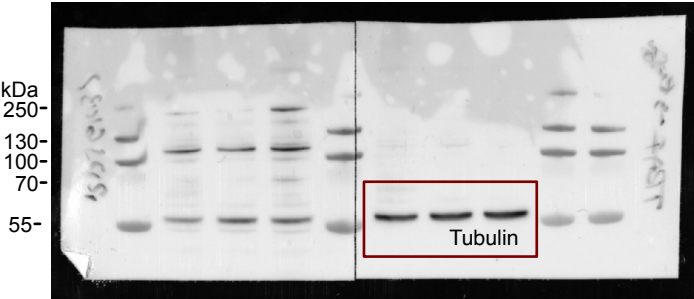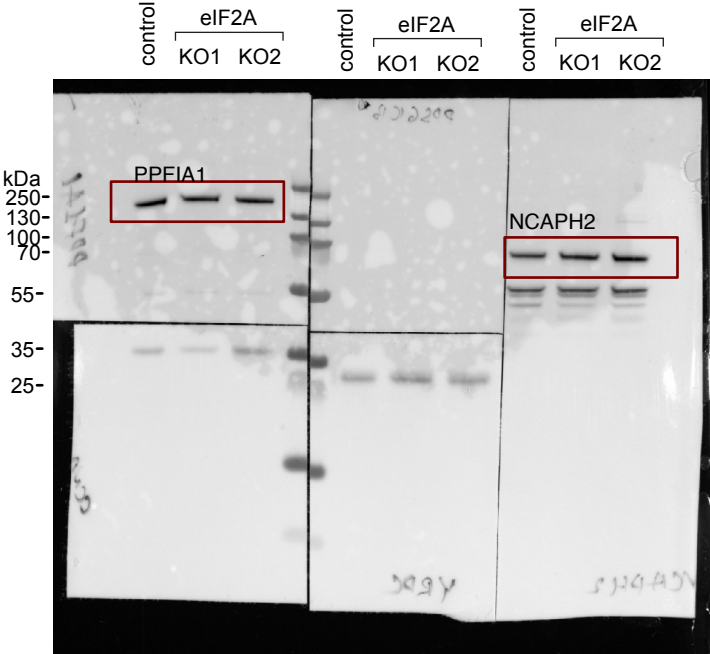

RPS6KB2 signal  
was weak  
re-developed with FEMTO

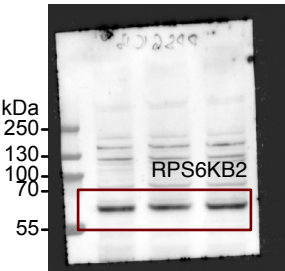

Supplement: fig2-data1 [file elife-105311-fig2-data1-v1.pdf]
