# Supplementary material for: Human eIF2A has a minimal role in translation initiation and in uORF-mediated translational control in HeLa cells
Source: eLife journal article supplement (doi:10.7554/elife.105311), 2025-01-17

## Fig2 Suppl. Figure 2B

the area of interest was directly incubated with both eIF2A and tubulin antibodies:

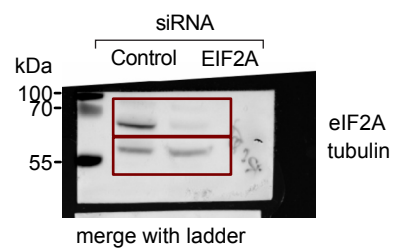

Supplement: fig2-figsupp2-data1 [file elife-105311-fig2-figsupp2-data1-v1.pdf]
