# Supplementary material for: Human eIF2A has a minimal role in translation initiation and in uORF-mediated translational control in HeLa cells
Source: eLife journal article supplement (doi:10.7554/elife.105311), 2025-01-17

## Figure 3

**B**

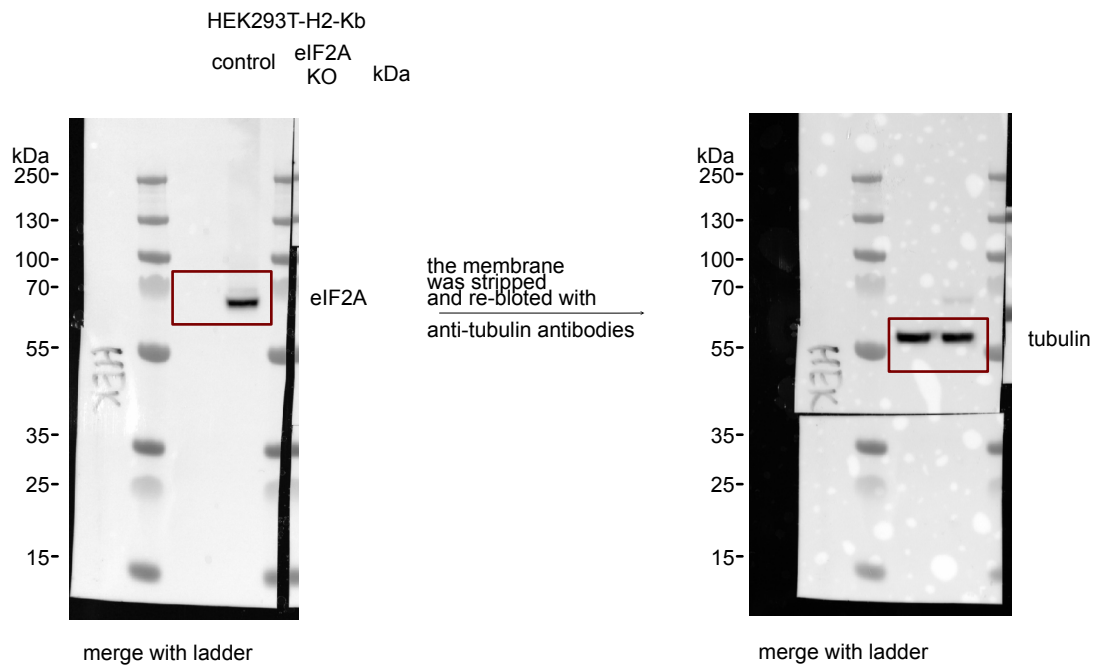

Supplement: fig3-data1 [file elife-105311-fig3-data1-v1.pdf]
