# Supplementary material for: Human eIF2A has a minimal role in translation initiation and in uORF-mediated translational control in HeLa cells
Source: eLife journal article supplement (doi:10.7554/elife.105311), 2025-01-17

Fig3 Suppl. Figure 1G

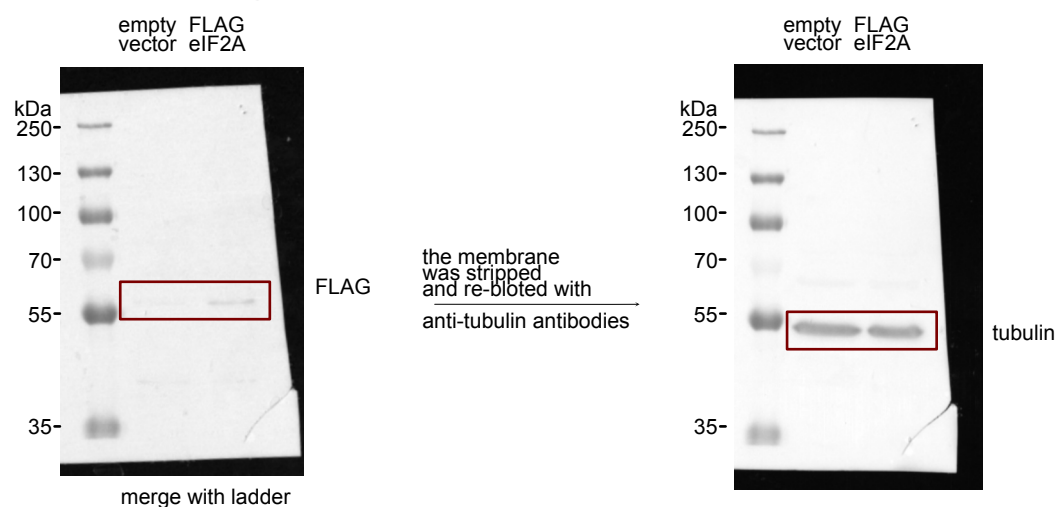

Supplement: fig3-figsupp1-data1 [file elife-105311-fig3-figsupp1-data1-v1.pdf]
