# Supplementary material for: Human eIF2A has a minimal role in translation initiation and in uORF-mediated translational control in HeLa cells
Source: eLife journal article supplement (doi:10.7554/elife.105311), 2025-01-17
Supplement: fig4-figsupp1-data1 [file elife-105311-fig4-figsupp1-data1-v1.pdf]

# Fig.4. Suppl. Figure 1D

same samples were run in a parallel:

| HeLa | control |     |     | eIF2A |     |     | control |     |     | eIF2A |     |     | control |     |     | eIF2A |   |   |
|------|---------|-----|-----|-------|-----|-----|---------|-----|-----|-------|-----|-----|---------|-----|-----|-------|---|---|
|      | CO      | KO1 | KO2 | CO    | KO1 | KO2 | CO      | KO1 | KO2 | CO    | KO1 | KO2 | CO      | KO1 | KO2 |       |   |   |
| TM:  | -       | -   | -   | +     | +   | +   | -       | -   | -   | +     | +   | +   | -       | -   | -   | +     | + | + |

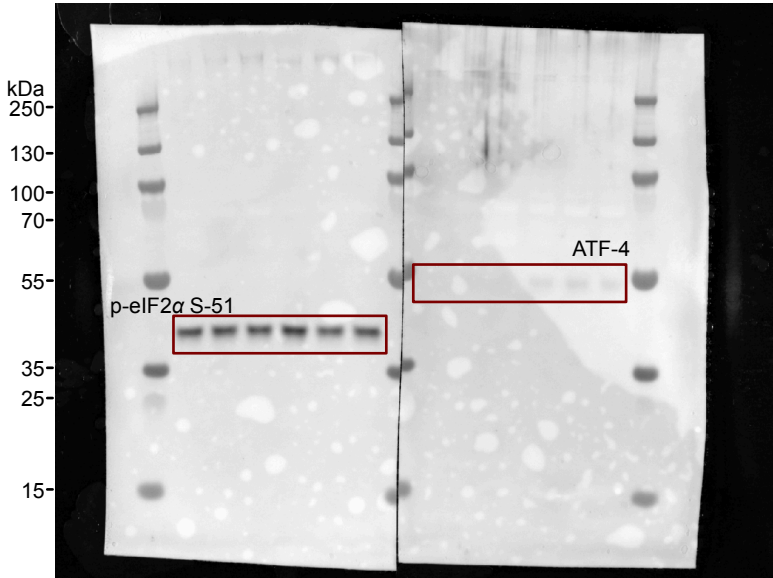

ATF-4 signal was weak  
re-developed with FEMTO

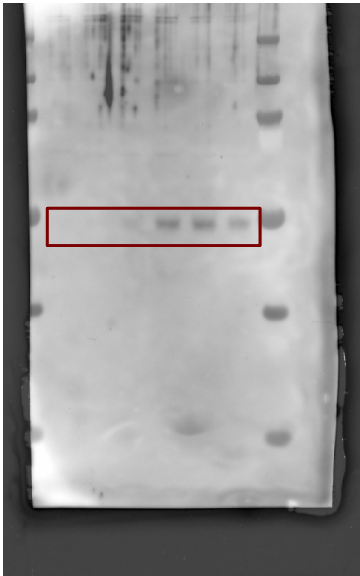

merge with ladder  
the membranes were stripped and re-blotted with eIF2α and eIF2A antibodies

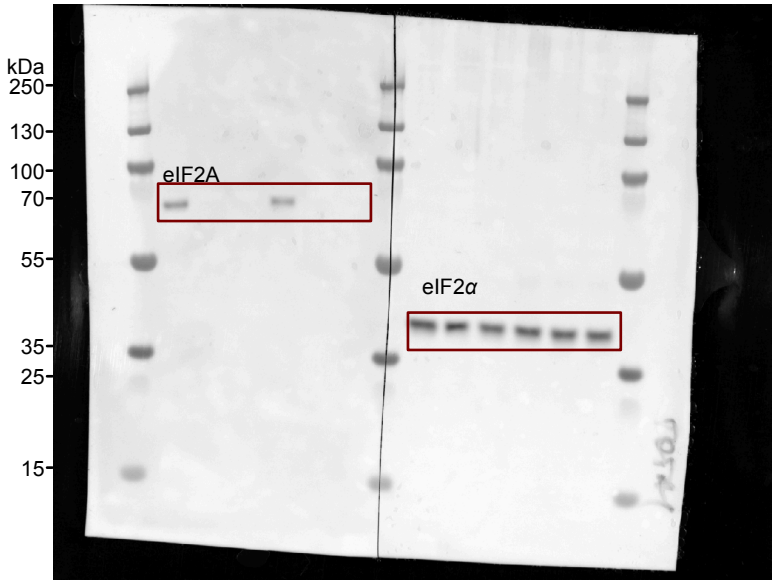

part of left membrane was  
reincubated with  
GAPDH antibody

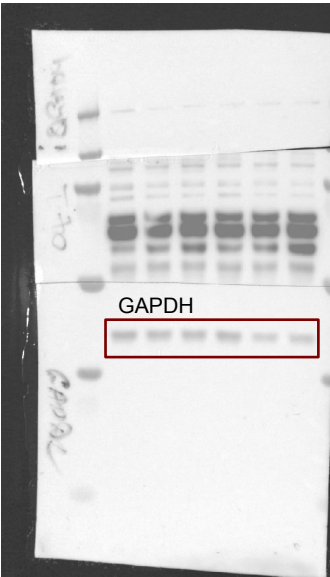

merge with ladder

merge with ladder
