# Supplementary material for: Human eIF2A has a minimal role in translation initiation and in uORF-mediated translational control in HeLa cells
Source: eLife. 2025 Jul 2;14:RP105311. doi: 10.7554/eLife.105311 (PMC12221301; doi:10.7554/eLife.105311)
Supplement: Source data 1. [file elife-105311-data1.xlsx]

## Sheet: Fig.1 
PANEL B			WT								KO 1								KO 2
		0	7040	7323	7540	7058	6738	7747	8106	8030	9134	9588	8379	9191	9021	10012	9172	10145	11741	11155	10740	11571	11448	11694	13319	12724
		1	19108	19724	20122	21259	19752	21846	22377	19620	21126	26208	27546	25705	24756	24994	27432	23400	25098	27299	30053	26265	28961	30880	27527	24415
		2	57028	61379	62732	58599	62050	62290	63269	58388	47493	54596	59165	61945	66245	61830	64507	56482	49920	66917	72686	72214	74255	72378	73918	53888
		3	106682	118124	129938	126768	135709	130898	133562	118729	88127	101951	103204	107440	105759	110408	112481	93216	74611	105059	115950	120466	119793	120896	116642	80229
		4	110339	127668	134974	143975	141676	148244	148727	123777	84330	126093	122389	130193	129468	125634	124441	100689	49939	92229	104914	112481	112121	105176	99370	63710
		Dunnett's multiple comparisons test	Mean Diff.	95.00% CI of diff.	Below threshold?	Summary	Adjusted P Value	A-?
		WT vs. KO 1	6876	-71308 to 85059	No	ns	0.9653	B	KO 1
		WT vs. KO 2	8607	-69577 to 86790	No	ns	0.9463	C	KO 2
PANEL D
		WT	1	1	1			Dunnett's multiple comparisons test	Mean Diff.	95.00% CI of diff.	Below threshold?	Summary	Adjusted P Value	A-?
		KO1	0.96855	0.69661	0.90858			WT vs. KO 1	0.1421	-0.3195 to 0.6037	No	ns	0.6087	B	KO 1
		KO2	1.29085	0.770469	0.736436			WT vs. KO 2	0.06741	-0.3942 to 0.5290	No	ns	0.8835	C	KO 2
PANEL E					PANEL F			WT			eIF2A KO1			eIF2A KO2
							polysome to monosome	1	0.929501	1.0705	1.06668	1.05807	0.939911	0.966973	0.966464	0.960841
time	WT	KO1	KO2
-0.07	0.000887	2.3e-05	2.9e-05				Dunnett's multiple comparisons test	Mean Diff.	95.00% CI of diff.	Below threshold?	Summary	Adjusted P Value	A-?
-0.04	0.002398	2.4e-05	3e-05				WT vs. eIF2A KO1	-0.02155	-0.1565 to 0.1134	No	ns	0.8632	B	eIF2A KO1
-0.01	0.005771	2.4e-05	3e-05				WT vs. eIF2A KO2	0.03524	-0.09972 to 0.1702	No	ns	0.6911	C	eIF2A KO2
0.02	0.009679	2.3e-05	2.8e-05
0.05	0.014268	2.3e-05	3e-05
0.08	0.02023	2.3e-05	3e-05
0.11	0.025664	2.2e-05	2.9e-05
0.14	0.031263	2.1e-05	2.7e-05
0.17	0.036936	4.3e-05	2.7e-05
0.2	0.042629	0.000433	2.7e-05
0.23	0.049295	0.001426	2.6e-05
0.26	0.055039	0.002684	2.8e-05
0.29	0.061746	0.004959	2.7e-05
0.32	0.067511	0.007343	2.6e-05
0.35	0.073236	0.010671	2.6e-05
0.38	0.078748	0.013904	2.6e-05
0.41	0.083872	0.017367	2.7e-05
0.44	0.089126	0.020959	2.8e-05
0.47	0.092901	0.024697	2.6e-05
0.5	0.096394	0.02946	2.5e-05
0.53	0.098246	0.03403	2.5e-05
0.56	0.099806	0.039002	2.5e-05
0.59	0.100932	0.045076	2.6e-05
0.62	0.101482	0.049468	2.6e-05
0.65	0.101835	0.055527	2.3e-05
0.68	0.101991	0.060524	2.2e-05
0.71	0.102071	0.066047	2.3e-05
0.74	0.102143	0.070525	2.4e-05
0.77	0.10217	0.074719	2.3e-05
0.8	0.102184	0.078626	2.4e-05
0.83	0.102197	0.082245	2.3e-05
0.86	0.102213	0.086012	2.3e-05
0.89	0.102218	0.088804	2.3e-05
0.92	0.102219	0.09132	2.4e-05
0.95	0.102231	0.094026	2.4e-05
0.96	0.10223	0.096212	0.00018
0.98	0.102234	0.098165	0.000895
1.01	0.102231	0.099696	0.003389
1.04	0.102229	0.100734	0.006829
1.07	0.102235	0.101449	0.0112
1.1	0.102241	0.101784	0.017092
1.13	0.102247	0.101996	0.022518
1.16	0.102249	0.102072	0.028139
1.19	0.102253	0.102126	0.03385
1.22	0.102255	0.102159	0.040524
1.25	0.102252	0.102178	0.046264
1.28	0.102255	0.102199	0.052016
1.31	0.102259	0.102202	0.058739
1.34	0.102256	0.10221	0.063548
1.37	0.102261	0.102219	0.070287
1.4	0.102254	0.102223	0.076001
1.43	0.102252	0.102219	0.081507
1.46	0.102259	0.102222	0.087337
1.49	0.10226	0.102232	0.091654
1.52	0.102262	0.102242	0.095179
1.55	0.102262	0.10224	0.097829
1.58	0.102263	0.10224	0.099631
1.61	0.102272	0.102239	0.100881
1.64	0.102269	0.102241	0.101476
1.67	0.102262	0.102248	0.101844
1.7	0.102268	0.102244	0.101994
1.73	0.102262	0.102247	0.102082
1.76	0.102265	0.102247	0.10214
1.79	0.102266	0.102246	0.102172
1.82	0.102266	0.102254	0.102189
1.85	0.102272	0.102247	0.10219
1.88	0.102264	0.102248	0.102195
1.91	0.102265	0.102253	0.102203
1.94	0.10227	0.102256	0.102206
1.97	0.102272	0.102259	0.10221
2	0.102268	0.102259	0.102228
2.03	0.102266	0.102259	0.102226
2.06	0.102271	0.102257	0.10223
2.09	0.102273	0.102262	0.102244
2.12	0.102277	0.102269	0.102249
2.15	0.102273	0.102268	0.102242
2.18	0.102267	0.10227	0.102249
2.21	0.102271	0.10227	0.102249
2.24	0.102267	0.102263	0.102246
2.27	0.102272	0.102263	0.102243
2.3	0.102277	0.102263	0.102256
2.33	0.102267	0.102262	0.102254
2.36	0.102265	0.102262	0.102248
2.39	0.102276	0.102269	0.102245
2.42	0.102282	0.102273	0.102254
2.45	0.102277	0.102267	0.102261
2.48	0.102278	0.102264	0.102253
2.51	0.102277	0.102262	0.102248
2.54	0.102278	0.102262	0.102257
2.57	0.102269	0.102275	0.102261
2.6	0.10227	0.102276	0.102263
2.63	0.102277	0.102265	0.10226
2.66	0.102274	0.102267	0.102258
2.69	0.102274	0.102267	0.102261
2.72	0.102278	0.10227	0.102265
2.75	0.102283	0.102272	0.102274
2.78	0.102284	0.102268	0.10227
2.81	0.102283	0.102268	0.102266
2.84	0.102279	0.102275	0.102263
2.87	0.102281	0.102274	0.102265
2.9	0.102285	0.102274	0.102275
2.93	0.102278	0.102273	0.102268
2.96	0.102276	0.102272	0.102269
2.99	0.10228	0.102268	0.102271
3.02	0.102281	0.102275	0.102269
3.05	0.102276	0.102275	0.102271
3.08	0.102281	0.102279	0.102276
3.11	0.102283	0.102278	0.102273
3.14	0.102278	0.102279	0.102264
3.17	0.102279	0.102271	0.102273
3.2	0.102284	0.102269	0.10228
3.23	0.102279	0.102272	0.102273
3.26	0.102281	0.102275	0.102275
3.29	0.102275	0.102272	0.102269
3.32	0.10228	0.102278	0.102268
3.35	0.102283	0.102282	0.102274
3.38	0.102283	0.102277	0.102274
3.41	0.102286	0.102277	0.10227
3.44	0.102278	0.10228	0.102263
3.47	0.102288	0.102272	0.102275
3.5	0.102293	0.102275	0.102276
3.53	0.102289	0.10228	0.102277
3.56	0.102289	0.102283	0.102272
3.59	0.102284	0.102283	0.10227
3.62	0.102284	0.10228	0.102273
3.65	0.102285	0.102283	0.102272
3.68	0.102281	0.10228	0.102276
3.71	0.10228	0.102277	0.102284
3.74	0.102281	0.102276	0.10228
3.77	0.102288	0.102277	0.102271
3.8	0.102282	0.102285	0.10227
3.83	0.102285	0.102287	0.102272
3.86	0.102291	0.102281	0.102276
3.89	0.102282	0.102269	0.102281
3.92	0.102275	0.102268	0.102277
3.95	0.102284	0.102281	0.102273
3.98	0.102285	0.10229	0.102272
4.01	0.102295	0.102279	0.102271
4.04	0.102283	0.102277	0.102273
4.07	0.102282	0.102279	0.102278
4.1	0.102287	0.102277	0.102286
4.13	0.102279	0.102277	0.102289
4.16	0.10228	0.102281	0.102278
4.19	0.102285	0.102283	0.102271
4.22	0.102281	0.102277	0.102276
4.25	0.102285	0.10228	0.102278
4.28	0.102283	0.102288	0.102278
4.31	0.102283	0.102288	0.102283
4.34	0.102281	0.102276	0.102284
4.37	0.102281	0.102283	0.102282
4.4	0.102284	0.102279	0.102276
4.43	0.102282	0.102288	0.102283
4.46	0.102283	0.102281	0.102284
4.49	0.10228	0.102276	0.102273
4.52	0.10228	0.102278	0.102275
4.55	0.102278	0.102284	0.102278
4.58	0.102283	0.102279	0.102279
4.61	0.10229	0.102282	0.102281
4.64	0.10229	0.102278	0.102277
4.67	0.10229	0.102279	0.10228
4.7	0.102285	0.102285	0.102276
4.73	0.102289	0.102285	0.102285
4.76	0.102289	0.102288	0.102291
4.79	0.102285	0.102286	0.102287
4.82	0.102278	0.102276	0.102273
4.85	0.102284	0.102272	0.10227
4.88	0.102284	0.102286	0.102281
4.91	0.102283	0.102283	0.102283
4.94	0.102286	0.102281	0.102275
4.97	0.102289	0.102281	0.102276
5	0.102282	0.102278	0.10228
5.03	0.102281	0.102282	0.102281
5.06	0.102282	0.102281	0.102286
5.09	0.102288	0.102281	0.102282
5.12	0.102284	0.102282	0.10228
5.15	0.102283	0.102282	0.10228
5.18	0.102287	0.102277	0.102287
5.21	0.102287	0.102287	0.102292
5.24	0.102294	0.102284	0.102288
5.27	0.102291	0.102283	0.102288
5.3	0.102283	0.10228	0.102288
5.33	0.102284	0.102279	0.102287
5.36	0.102288	0.102282	0.102278
5.39	0.102287	0.102293	0.102276
5.42	0.102284	0.102288	0.102271
5.45	0.102286	0.102271	0.102272
5.48	0.102274	0.102274	0.102279
5.51	0.102281	0.102282	0.102288
5.54	0.102286	0.102281	0.102285
5.57	0.102286	0.102283	0.102281
5.6	0.102283	0.102281	0.102278
5.63	0.102287	0.102285	0.102282
5.66	0.102288	0.102281	0.102285
5.69	0.102291	0.10228	0.10229
5.72	0.102285	0.102288	0.102285
5.75	0.102281	0.102287	0.102279
5.78	0.102283	0.102279	0.102281
5.81	0.102285	0.102284	0.102282
5.84	0.102289	0.102287	0.102293
5.87	0.102291	0.102287	0.102284
5.9	0.102289	0.102277	0.10228
5.93	0.102285	0.10228	0.102285
5.96	0.102286	0.102285	0.102283
5.99	0.10229	0.102288	0.102289
6.02	0.102284	0.102281	0.102282
6.05	0.102283	0.102282	0.102286
6.08	0.102287	0.102282	0.102282
6.11	0.102286	0.10228	0.102282
6.14	0.102283	0.102285	0.102286
6.17	0.102286	0.102285	0.102279
6.2	0.102285	0.102285	0.102283
6.23	0.102288	0.102279	0.102291
6.26	0.102287	0.102286	0.102289
6.29	0.102284	0.10229	0.10228
6.32	0.10228	0.102291	0.10228
6.35	0.10228	0.102283	0.102277
6.38	0.10228	0.102276	0.10228
6.41	0.10229	0.102278	0.102278
6.44	0.102288	0.102288	0.102286
6.47	0.102281	0.102295	0.10229
6.5	0.102284	0.102287	0.10228
6.53	0.102287	0.102282	0.102283
6.56	0.10228	0.102287	0.102278
6.59	0.102285	0.102288	0.102284
6.62	0.10229	0.102283	0.102288
6.65	0.102283	0.102284	0.102284
6.68	0.102282	0.102283	0.102284
6.71	0.102285	0.102283	0.102284
6.74	0.102294	0.102296	0.102295
6.77	0.102292	0.102291	0.102284
6.8	0.102289	0.10228	0.102285
6.83	0.102286	0.10228	0.102284
6.86	0.102286	0.102284	0.102284
6.89	0.10229	0.102287	0.102291
6.92	0.102294	0.102285	0.102287
6.95	0.102285	0.10228	0.102284
6.98	0.102279	0.10228	0.102291
7.01	0.102289	0.102284	0.102288
7.04	0.102283	0.102285	0.102286
7.07	0.102251	0.102289	0.102293
7.1	0.102158	0.102284	0.102287
7.13	0.102033	0.102275	0.102283
7.16	0.101779	0.102277	0.102286
7.19	0.101473	0.10228	0.102295
7.22	0.101075	0.102286	0.102299
7.25	0.100514	0.102284	0.102289
7.28	0.099953	0.10228	0.102274
7.31	0.099322	0.102274	0.102281
7.34	0.098616	0.102285	0.102283
7.37	0.097684	0.102293	0.102288
7.4	0.0968	0.102289	0.102289
7.43	0.095838	0.102285	0.102283
7.46	0.094633	0.10228	0.102282
7.49	0.093519	0.10228	0.102282
7.52	0.092337	0.102286	0.102284
7.55	0.091077	0.102282	0.102285
7.58	0.08976	0.102269	0.102276
7.61	0.08823	0.102213	0.102285
7.64	0.086913	0.102114	0.102291
7.67	0.085405	0.101915	0.102287
7.7	0.084337	0.101656	0.102282
7.73	0.083094	0.101279	0.102283
7.76	0.081693	0.100888	0.10228
7.79	0.080522	0.100513	0.10228
7.82	0.079197	0.099897	0.102274
7.83	0.07901	0.09929	0.102232
7.85	0.078086	0.098498	0.102136
7.88	0.076997	0.097756	0.101937
7.91	0.075934	0.09696	0.1017
7.94	0.074905	0.096096	0.101433
7.97	0.073729	0.095177	0.100977
8	0.072737	0.09401	0.100489
8.03	0.071592	0.09294	0.099821
8.06	0.070794	0.091805	0.099171
8.09	0.069836	0.090421	0.098458
8.12	0.068707	0.089206	0.097675
8.15	0.067729	0.089001	0.096823
8.18	0.066585	0.087978	0.095746
8.21	0.065604	0.086737	0.094756
8.24	0.064639	0.085497	0.093519
8.27	0.063682	0.084053	0.092398
8.3	0.062725	0.082831	0.091215
8.33	0.061605	0.081414	0.089999
8.36	0.060646	0.080403	0.088773
8.39	0.05971	0.079001	0.087346
8.42	0.058641	0.077806	0.086122
8.45	0.057883	0.076613	0.084927
8.48	0.056849	0.075227	0.083558
8.51	0.055985	0.074053	0.082595
8.54	0.055027	0.07289	0.081278
8.57	0.054236	0.071762	0.080173
8.6	0.053477	0.070655	0.079085
8.63	0.052743	0.069388	0.077828
8.66	0.05205	0.068343	0.07676
8.69	0.051262	0.067164	0.075718
8.72	0.050601	0.066351	0.075546
8.75	0.049961	0.065412	0.074682
8.78	0.049229	0.064357	0.073495
8.81	0.048627	0.063487	0.072462
8.84	0.048052	0.062481	0.071447
8.87	0.047476	0.06167	0.070277
8.9	0.046921	0.060765	0.069266
8.93	0.046272	0.060127	0.068252
8.96	0.045729	0.059381	0.067234
8.99	0.045106	0.058531	0.066225
9.02	0.044659	0.057823	0.065085
9.05	0.044047	0.057007	0.064114
9.08	0.043525	0.056318	0.063006
9.11	0.043003	0.055752	0.062236
9.14	0.042383	0.054967	0.061328
9.17	0.041854	0.054295	0.060288
9.2	0.041341	0.053503	0.059426
9.23	0.040834	0.052824	0.058455
9.26	0.040341	0.052145	0.05764
9.29	0.039772	0.05146	0.05698
9.32	0.039277	0.050783	0.056081
9.35	0.038703	0.049987	0.055336
9.38	0.038313	0.049298	0.054507
9.41	0.037858	0.048614	0.053807
9.44	0.037346	0.047815	0.053014
9.47	0.03692	0.047146	0.052473
9.5	0.036425	0.046495	0.05184
9.53	0.036007	0.045845	0.051116
9.56	0.0356	0.04508	0.0505
9.59	0.035202	0.044444	0.0498
9.62	0.034827	0.04384	0.049212
9.65	0.034425	0.043152	0.048628
9.68	0.034078	0.042667	0.048034
9.71	0.033698	0.042021	0.047448
9.74	0.033378	0.041501	0.046774
9.77	0.033124	0.041012	0.046213
9.8	0.032788	0.04048	0.04564
9.83	0.032517	0.040044	0.044971
9.86	0.032214	0.039623	0.044489
9.89	0.031963	0.039235	0.043816
9.92	0.031699	0.038866	0.043263
9.95	0.031456	0.038463	0.042623
9.98	0.031207	0.038132	0.042086
10.01	0.03093	0.037754	0.041552
10.04	0.030696	0.037498	0.041034
10.07	0.030469	0.03714	0.040517
10.1	0.030202	0.036847	0.039937
10.13	0.029964	0.036563	0.039463
10.16	0.029734	0.03622	0.038993
10.19	0.029501	0.035923	0.038456
10.22	0.029224	0.035568	0.038008
10.25	0.028995	0.035319	0.037578
10.28	0.028769	0.035018	0.03716
10.31	0.028511	0.03466	0.036765
10.34	0.028332	0.034355	0.036328
10.37	0.028083	0.033998	0.035984
10.4	0.027874	0.033685	0.035602
10.43	0.027671	0.033424	0.035343
10.46	0.027436	0.033058	0.035038
10.49	0.027246	0.032755	0.034691
10.52	0.027053	0.032407	0.034396
10.55	0.02688	0.032122	0.034079
10.58	0.026704	0.031844	0.033808
10.61	0.026492	0.031586	0.03354
10.64	0.026319	0.031339	0.033261
10.67	0.026116	0.031066	0.032988
10.7	0.025975	0.030848	0.032691
10.73	0.025796	0.03061	0.032431
10.76	0.025582	0.030407	0.032129
10.79	0.025406	0.030212	0.031905
10.82	0.025189	0.030018	0.031621
10.85	0.024999	0.029824	0.031306
10.89	0.024776	0.029613	0.031027
10.91	0.024611	0.029431	0.03071
10.94	0.024406	0.029252	0.030439
10.97	0.024155	0.02904	0.030174
11	0.023938	0.028885	0.029913
11.03	0.023705	0.028657	0.029662
11.06	0.023504	0.028469	0.029375
11.09	0.023341	0.028267	0.029143
11.12	0.023106	0.028023	0.028887
11.15	0.022912	0.027826	0.02868
11.18	0.022693	0.027615	0.028516
11.21	0.022516	0.027407	0.028284
11.24	0.022342	0.02717	0.028095
11.27	0.022166	0.026964	0.027898
11.3	0.021997	0.026767	0.02772
11.33	0.021812	0.02655	0.027543
11.36	0.021645	0.026398	0.027376
11.39	0.021465	0.026185	0.027209
11.42	0.021306	0.026007	0.027
11.45	0.021158	0.025831	0.026825
11.48	0.020998	0.025646	0.026664
11.51	0.020843	0.025492	0.026467
11.54	0.02067	0.025322	0.02629
11.57	0.020517	0.025198	0.026113
11.6	0.020361	0.025055	0.025926
11.63	0.020189	0.024892	0.025738
11.66	0.020065	0.024752	0.025525
11.69	0.019893	0.024573	0.025335
11.72	0.019748	0.024415	0.025113
11.75	0.019601	0.02427	0.024961
11.78	0.01944	0.024073	0.024755
11.81	0.019309	0.02389	0.02459
11.84	0.019179	0.023678	0.024432
11.87	0.019036	0.023486	0.024246
11.9	0.018906	0.023257	0.024095
11.93	0.018755	0.023094	0.023964
11.96	0.018633	0.022899	0.023841
11.99	0.018492	0.022663	0.023712
12.02	0.018397	0.02246	0.023568
12.05	0.018264	0.022223	0.023451
12.08	0.018156	0.022017	0.023327
12.11	0.018048	0.02182	0.023233
12.14	0.017921	0.021624	0.02311
12.17	0.017814	0.021429	0.022964
12.21	0.017698	0.021207	0.022827
12.23	0.017621	0.021031	0.022679
12.26	0.017528	0.020858	0.022555
12.29	0.017423	0.020663	0.02239
12.32	0.017339	0.020518	0.022268
12.35	0.017242	0.020314	0.022112
12.38	0.017164	0.020158	0.021934
12.41	0.01711	0.019989	0.021779
12.44	0.017028	0.019849	0.021592
12.47	0.016965	0.019705	0.021415
12.5	0.016894	0.019561	0.021263
12.53	0.016843	0.019417	0.021062
12.56	0.016791	0.019272	0.020881
12.59	0.016751	0.019155	0.020674
12.62	0.016711	0.019026	0.020497
12.65	0.016667	0.018872	0.020321
12.68	0.016631	0.018764	0.020148
12.71	0.016585	0.018615	0.019988
12.74	0.016549	0.018493	0.019814
12.77	0.016517	0.018382	0.019649
12.8	0.016488	0.018241	0.0195
12.83	0.016449	0.018126	0.01934
12.86	0.016413	0.018002	0.019198
12.89	0.016386	0.017914	0.019055
12.92	0.016348	0.017809	0.018942
12.95	0.016302	0.017692	0.018799
12.98	0.016269	0.017586	0.018678
13.01	0.016223	0.017468	0.018568
13.04	0.016175	0.017371	0.018441
13.07	0.016122	0.01727	0.018352
13.1	0.016061	0.017183	0.018245
13.13	0.016008	0.017095	0.018143
13.16	0.015963	0.017002	0.01805
13.19	0.015911	0.016915	0.017939
13.22	0.015849	0.016822	0.017847
13.25	0.015786	0.016755	0.017757
13.28	0.01574	0.016677	0.01768
13.31	0.01568	0.016591	0.017596
13.34	0.015635	0.016521	0.0175
13.37	0.015571	0.01645	0.017417
13.4	0.015511	0.016394	0.017309
13.43	0.015447	0.016331	0.017244
13.46	0.01539	0.016276	0.017152
13.49	0.015337	0.016224	0.017084
13.53	0.015273	0.01617	0.017018
13.55	0.015232	0.016121	0.016944
13.58	0.015176	0.016062	0.016872
13.61	0.015112	0.016021	0.016784
13.64	0.015059	0.015987	0.016723
13.67	0.015013	0.01595	0.016652
13.7	0.014969	0.015909	0.016575
13.73	0.014919	0.015859	0.016515
13.76	0.014877	0.015821	0.016438
13.79	0.014833	0.015789	0.016391
13.82	0.014783	0.01575	0.016355
13.85	0.014742	0.015706	0.016318
13.88	0.014697	0.015648	0.016291
13.91	0.014668	0.0156	0.016264
13.94	0.014639	0.01555	0.016241
13.97	0.014607	0.015495	0.016219
14	0.014579	0.015454	0.016196
14.03	0.014546	0.015395	0.01616
14.06	0.01452	0.015343	0.016114
14.09	0.014486	0.015293	0.016074
14.12	0.014462	0.01524	0.016032
14.15	0.014433	0.01519	0.015984
14.18	0.014398	0.015126	0.015925
14.21	0.014359	0.015084	0.015873
14.24	0.014335	0.015023	0.015823
14.27	0.014306	0.014975	0.015768
14.3	0.01428	0.014928	0.015701
14.33	0.014253	0.014869	0.015627
14.36	0.01423	0.014822	0.015523
14.39	0.014201	0.014776	0.015447
14.42	0.014182	0.014739	0.015342
14.45	0.014161	0.0147	0.015257
14.48	0.014135	0.014656	0.015175
14.51	0.014114	0.014606	0.01509
14.54	0.014092	0.014564	0.015033
14.57	0.014073	0.014544	0.014993
14.6	0.014051	0.014518	0.014957
14.63	0.014035	0.014487	0.014917
14.66	0.014026	0.014448	0.01489
14.66	0.014024	0.014412	0.014871
14.69	0.014007	0.014384	0.014855
14.72	0.013995	0.014354	0.014844
14.75	0.013975	0.014332	0.014832
14.78	0.013942	0.014297	0.014833
14.81	0.013915	0.014268	0.01483
14.85	0.01388	0.014256	0.014819
14.87	0.013863	0.014232	0.014819
14.9	0.013828	0.014215	0.014822
14.93	0.013803	0.014196	0.01482
14.96	0.013768	0.014173	0.014821
14.99	0.01373	0.014153	0.01481
15.02	0.013695	0.01415	0.0148
15.05	0.013659	0.014132	0.014782
15.08	0.013628	0.014108	0.014753
15.11	0.013599	0.014079	0.014736
15.14	0.013562	0.014065	0.0147
15.17	0.01353	0.014042	0.014681
15.2	0.013498	0.014019	0.014648
15.23	0.01348	0.014	0.014625
15.26	0.01345	0.013971	0.014602
15.29	0.013425	0.013945	0.014585
15.32	0.013408	0.01393	0.014555
15.35	0.013396	0.013905	0.014535
15.38	0.013383	0.013885	0.014512
15.41	0.013379	0.013858	0.014476
15.44	0.013376	0.013834	0.014441
15.47	0.013369	0.01381	0.014407
15.5	0.013365	0.013789	0.014376
15.53	0.013356	0.013783	0.014342
15.56	0.013352	0.013762	0.014337
15.59	0.013342	0.013741	0.014307
15.62	0.013336	0.013721	0.014279
15.65	0.013335	0.013706	0.014253
15.68	0.013322	0.013697	0.014235
15.71	0.013326	0.013675	0.014216
15.74	0.013318	0.013647	0.014179
15.77	0.013309	0.013634	0.014165
15.8	0.013295	0.013619	0.014139
15.83	0.013282	0.013606	0.014113
15.86	0.013255	0.013573	0.014095
15.89	0.013232	0.013545	0.014086
15.92	0.013211	0.013518	0.014075
15.95	0.013188	0.013499	0.014069
15.98	0.01317	0.013478	0.014062
16.01	0.013139	0.013446	0.014052
16.04	0.013117	0.013412	0.014045
16.07	0.013093	0.013379	0.014048
16.1	0.013078	0.01336	0.014047
16.13	0.013057	0.013338	0.014039
16.17	0.013028	0.013311	0.014022
16.19	0.013006	0.013279	0.014
16.22	0.012987	0.01326	0.013986
16.25	0.012974	0.013243	0.013968
16.28	0.012962	0.013225	0.013952
16.31	0.012958	0.013196	0.013942
16.34	0.012954	0.013171	0.013914
16.37	0.012946	0.013149	0.013898
16.4	0.012949	0.013132	0.013877
16.43	0.012946	0.013115	0.013863
16.46	0.012947	0.0131	0.013854
16.49	0.012937	0.013094	0.013828
16.52	0.012932	0.013071	0.013804
16.55	0.012926	0.013057	0.013794
16.58	0.012928	0.013042	0.013784
16.61	0.012932	0.013028	0.013777
16.64	0.012922	0.013013	0.013778
16.67	0.01292	0.012996	0.013787
16.7	0.012908	0.012986	0.013796
16.73	0.012899	0.012985	0.013797
16.76	0.012886	0.012969	0.013798
16.79	0.012864	0.012948	0.013807
16.82	0.012847	0.012928	0.013827
16.85	0.012844	0.012913	0.013845
16.88	0.012831	0.0129	0.013864
16.91	0.012825	0.012896	0.013879
16.94	0.012816	0.01288	0.013892
16.97	0.01281	0.012856	0.013907
17	0.012803	0.012848	0.013931
17.03	0.012799	0.012838	0.013947
17.06	0.012796	0.01283	0.013959
17.09	0.012798	0.012822	0.013966
17.12	0.012797	0.012814	0.013969
17.15	0.012795	0.01282	0.013972
17.18	0.012801	0.012823	0.013967
17.21	0.012809	0.012825	0.013956
17.24	0.012818	0.012825	0.013947
17.27	0.012825	0.012822	0.013932
17.3	0.012829	0.012828	0.013923
17.33	0.012838	0.012827	0.013911
17.36	0.012843	0.012826	0.013882
17.39	0.012844	0.012829	0.013862
17.42	0.012853	0.012829	0.013828
17.45	0.012866	0.01283	0.013809
17.49	0.012883	0.012835	0.013798
17.51	0.012889	0.012842	0.013777
17.54	0.012902	0.012843	0.013769
17.57	0.012904	0.012845	0.013752
17.6	0.012909	0.012849	0.013738
17.63	0.012915	0.012849	0.013732
17.66	0.012925	0.012844	0.013736
17.69	0.012922	0.012835	0.013739
17.72	0.012928	0.012834	0.013746
17.75	0.012947	0.012821	0.013739
17.78	0.012955	0.012814	0.013747
17.81	0.012974	0.012807	0.013749
17.84	0.012993	0.012792	0.013746
17.87	0.013006	0.012779	0.013732
17.9	0.013017	0.012765	0.013728
17.93	0.013032	0.012762	0.013729
17.96	0.013051	0.012756	0.01372
17.99	0.013073	0.012744	0.013712
18.02	0.013091	0.012746	0.013693
18.05	0.013109	0.012742	0.013681
18.08	0.013132	0.01275	0.013669
18.11	0.013146	0.012753	0.013661
18.14	0.013163	0.012749	0.013643
18.17	0.013176	0.012747	0.013611
18.2	0.013187	0.012746	0.013586
18.23	0.013207	0.012756	0.013563
18.26	0.013217	0.012767	0.013542
18.29	0.013238	0.012771	0.013521
18.32	0.013236	0.012779	0.013504
18.35	0.013238	0.01279	0.013486
18.38	0.013243	0.012797	0.013472
18.41	0.013245	0.012829	0.01346
18.44	0.013244	0.012842	0.013448
18.47	0.013239	0.012856	0.013433
18.5	0.013241	0.012864	0.01342
18.53	0.013243	0.012868	0.013399
18.56	0.013246	0.012883	0.013384
18.59	0.013245	0.012895	0.013374
18.62	0.013246	0.012896	0.013361
18.65	0.013251	0.012899	0.013342
18.68	0.013264	0.012904	0.013329
18.71	0.013281	0.012909	0.013329
18.74	0.013295	0.012922	0.01332
18.77	0.013306	0.012936	0.01331
18.81	0.013327	0.012948	0.013288
18.83	0.013346	0.012956	0.013293
18.86	0.013378	0.012971	0.013284
18.89	0.013404	0.012977	0.013274
18.92	0.013433	0.012993	0.013261
18.95	0.013468	0.012998	0.01325
18.98	0.013496	0.013012	0.013251
19.01	0.013526	0.013036	0.01324
19.04	0.013567	0.01306	0.013235
19.07	0.013614	0.013086	0.013228
19.1	0.013649	0.013096	0.013231
19.13	0.013688	0.01311	0.013218
19.16	0.013731	0.01313	0.013218
19.19	0.013766	0.013154	0.013214
19.22	0.013813	0.013186	0.013212
19.25	0.013858	0.013198	0.013209
19.28	0.013905	0.013214	0.013204
19.31	0.013957	0.013243	0.013195
19.34	0.014008	0.013262	0.013194
19.37	0.01406	0.013288	0.013185
19.4	0.014108	0.013326	0.01318
19.43	0.014158	0.013355	0.013184
19.46	0.014223	0.01338	0.013192
19.49	0.014289	0.013407	0.013206
19.52	0.014353	0.013435	0.013205
19.55	0.01441	0.013465	0.013214
19.58	0.014473	0.013513	0.013219
19.61	0.014531	0.013551	0.013233
19.64	0.014597	0.013577	0.013251
19.67	0.014665	0.013618	0.013278
19.7	0.014724	0.01366	0.013324
19.73	0.014805	0.01371	0.013354
19.76	0.014861	0.013759	0.013402
19.79	0.014929	0.013815	0.013446
19.82	0.015012	0.013876	0.013493
19.85	0.015077	0.013923	0.013543
19.88	0.01516	0.013987	0.013595
19.91	0.015232	0.014041	0.013663
19.94	0.015291	0.014102	0.013732
19.97	0.015375	0.014172	0.013806
20	0.015444	0.014229	0.013863
20.03	0.015518	0.014306	0.013913
20.06	0.015585	0.014362	0.01399
20.09	0.015644	0.014445	0.01406
20.12	0.01572	0.014506	0.014142
20.15	0.015774	0.014573	0.014211
20.18	0.015841	0.014665	0.014273
20.21	0.015894	0.014734	0.014343
20.24	0.015962	0.014797	0.0144
20.27	0.016021	0.014869	0.014483
20.3	0.01608	0.01493	0.014555
20.33	0.016133	0.014997	0.014624
20.36	0.016182	0.015057	0.014708
20.39	0.016239	0.015146	0.014772
20.42	0.016289	0.015207	0.014837
20.45	0.016331	0.015277	0.014912
20.48	0.016384	0.015351	0.014996
20.51	0.016421	0.01542	0.015068
20.54	0.016474	0.015496	0.015127
20.57	0.016518	0.015557	0.015208
20.6	0.016552	0.015622	0.015264
20.63	0.016596	0.015677	0.01534
20.66	0.016634	0.015729	0.015405
20.69	0.01667	0.015804	0.015477
20.72	0.016705	0.015863	0.015565
20.75	0.016752	0.015938	0.015626
20.78	0.016792	0.015998	0.015687
20.81	0.016814	0.016047	0.015752
20.84	0.016846	0.016118	0.01582
20.87	0.016877	0.016183	0.015896
20.9	0.016907	0.016255	0.015965
20.93	0.01693	0.016311	0.016043
20.96	0.016952	0.016363	0.016109
20.99	0.016969	0.016422	0.016158
21.02	0.016989	0.016469	0.016227
21.05	0.017006	0.016521	0.016287
21.08	0.017006	0.016555	0.016357
21.11	0.017013	0.0166	0.016408
21.14	0.017015	0.01665	0.016464
21.17	0.017015	0.016679	0.016511
21.2	0.017012	0.016722	0.016561
21.23	0.016997	0.016749	0.016617
21.26	0.016985	0.016771	0.016654
21.29	0.016963	0.016784	0.016706
21.32	0.016951	0.016806	0.016751
21.35	0.016934	0.016819	0.016791
21.38	0.01691	0.01683	0.016827
21.41	0.016885	0.016837	0.016856
21.44	0.016849	0.016836	0.016886
21.47	0.016825	0.016831	0.016912
21.5	0.016787	0.01683	0.016934
21.51	0.016781	0.016812	0.016964
21.53	0.016745	0.016794	0.016979
21.56	0.016699	0.01678	0.016987
21.59	0.016656	0.01677	0.017
21.62	0.016614	0.016757	0.017023
21.65	0.016573	0.016738	0.017033
21.68	0.016531	0.016712	0.017035
21.71	0.016474	0.016695	0.017039
21.74	0.016422	0.016671	0.017037
21.77	0.016376	0.016645	0.017036
21.8	0.016314	0.016614	0.017024
21.83	0.016265	0.01657	0.017012
21.86	0.016209	0.016563	0.016994
21.89	0.016145	0.016536	0.016987
21.92	0.016075	0.016504	0.016965
21.95	0.016018	0.016465	0.016943
21.98	0.015954	0.016426	0.016917
22.01	0.015885	0.016377	0.016887
22.04	0.015815	0.016334	0.016858
22.07	0.015729	0.016285	0.016836
22.1	0.015664	0.016239	0.016804
22.13	0.0156	0.016197	0.016764
22.16	0.015523	0.016134	0.016718
22.19	0.015452	0.016071	0.016675
22.22	0.015378	0.016007	0.016623
22.25	0.015316	0.015947	0.016573
22.28	0.015253	0.015887	0.016521
22.31	0.015177	0.015823	0.016481
22.34	0.015109	0.015763	0.016421
22.37	0.015027	0.015697	0.016351
22.4	0.014975	0.015637	0.016341
22.43	0.01491	0.015565	0.016296
22.46	0.014832	0.015502	0.016228
22.49	0.014777	0.015442	0.016174
22.52	0.014708	0.015363	0.016127
22.55	0.014659	0.015299	0.016047
22.58	0.0146	0.015227	0.015986
22.61	0.014544	0.01516	0.015915
22.64	0.014498	0.015097	0.015852
22.67	0.014437	0.015042	0.015793
22.7	0.014389	0.014986	0.015729
22.73	0.01433	0.014931	0.01567
22.76	0.014277	0.014878	0.015594
22.79	0.014233	0.014827	0.015531
22.82	0.014181	0.014774	0.01545
22.85	0.014137	0.014723	0.015379
22.88	0.01409	0.014677	0.015316
22.91	0.01405	0.014638	0.015238
22.94	0.014007	0.014583	0.015172
22.97	0.013964	0.014536	0.01509
23	0.013919	0.014493	0.015029
23.03	0.013875	0.01445	0.014965
23.06	0.013835	0.014416	0.014903
23.09	0.013783	0.014356	0.014834
23.12	0.013743	0.014313	0.014758
23.15	0.013718	0.014256	0.014693
23.18	0.013677	0.014201	0.01464
23.21	0.013637	0.014153	0.014578
23.24	0.013598	0.014098	0.014531
23.27	0.013558	0.014045	0.014465
23.3	0.013519	0.013999	0.01441
23.33	0.013482	0.013951	0.014366
23.36	0.013453	0.013904	0.014313
23.39	0.013405	0.013849	0.014255
23.42	0.013369	0.013795	0.014206
23.45	0.013343	0.01375	0.014157
23.48	0.013315	0.013698	0.014107
23.51	0.013286	0.013649	0.014055
23.54	0.01326	0.0136	0.014014
23.57	0.013234	0.013552	0.013969
23.6	0.013213	0.013508	0.013923
23.63	0.013191	0.01348	0.01388
23.66	0.013173	0.013449	0.013849
23.69	0.013154	0.01342	0.013811
23.72	0.013133	0.013389	0.013755
23.75	0.013109	0.013357	0.013718
23.78	0.013099	0.013336	0.013675
23.81	0.013089	0.013312	0.013636
23.84	0.013073	0.013273	0.013589
23.87	0.013053	0.013249	0.013549
23.9	0.013037	0.013221	0.01352
23.93	0.013029	0.013195	0.013488
23.96	0.013013	0.013178	0.013461
23.99	0.012994	0.013167	0.013426
24.02	0.012991	0.013142	0.013397
24.05	0.012975	0.013107	0.013374
24.08	0.012966	0.013084	0.013344
24.11	0.012964	0.013071	0.013313
24.14	0.012949	0.013059	0.013279
24.17	0.012929	0.013037	0.013254
24.2	0.012915	0.013015	0.013231
24.23	0.012904	0.012993	0.013203
24.26	0.012886	0.012975	0.013192
24.29	0.012876	0.012968	0.013169
24.32	0.012857	0.01295	0.013135
24.35	0.012836	0.012918	0.013118
24.38	0.012831	0.012906	0.013099
24.41	0.012829	0.012888	0.013083
24.44	0.01282	0.012871	0.013067
24.47	0.012813	0.012854	0.013051
24.5	0.012809	0.012833	0.013043
24.53	0.012803	0.012827	0.013033
24.56	0.012792	0.012819	0.013021
24.59	0.012784	0.01281	0.013001
24.62	0.012781	0.012797	0.01298
24.65	0.012774	0.012787	0.012963
24.68	0.012761	0.012775	0.012951
24.71	0.012759	0.01277	0.012938
24.74	0.012752	0.012774	0.012928
24.77	0.012739	0.012764	0.012907
24.8	0.012734	0.012747	0.012888
24.83	0.012738	0.012733	0.012878
24.86	0.012743	0.012721	0.01287
24.89	0.012748	0.012722	0.012862
24.92	0.012747	0.012719	0.01285
24.95	0.012733	0.012712	0.012835
24.98	0.012729	0.012709	0.012822
25.01	0.012724	0.012703	0.012803
25.04	0.012721	0.0127	0.012784
25.07	0.012717	0.012701	0.012774
25.1	0.012717	0.012701	0.012763
25.13	0.012716	0.012697	0.012752
25.16	0.012711	0.012694	0.01274
25.19	0.012708	0.012692	0.01273
25.22	0.012701	0.012682	0.012719
25.25	0.012697	0.012678	0.012709
25.28	0.012693	0.012673	0.012703
25.31	0.012697	0.012671	0.012707
25.34	0.012697	0.01267	0.012703
25.37	0.012695	0.012671	0.012706
25.4	0.012694	0.012666	0.012702
25.43	0.012697	0.012662	0.012701
25.46	0.012693	0.012661	0.012698
25.49	0.012698	0.012651	0.012702
25.52	0.012711	0.012652	0.012706
25.55	0.012717	0.01265	0.012702
25.58	0.012713	0.012651	0.012704
25.61	0.012709	0.012657	0.012702
25.64	0.01271	0.012655	0.012702
25.67	0.012724	0.012655	0.012705
25.7	0.012724	0.012651	0.012703
25.73	0.012718	0.012646	0.012696
25.76	0.012722	0.012653	0.012698
25.79	0.012726	0.012661	0.012698
25.82	0.012734	0.012663	0.012694
25.85	0.012742	0.012663	0.012684
25.88	0.012745	0.012664	0.012678
25.91	0.012752	0.012658	0.012671
25.94	0.012756	0.01266	0.012668
25.97	0.012755	0.012666	0.012671
26	0.012748	0.012672	0.012663
26.03	0.012741	0.012663	0.012659
26.06	0.012743	0.012657	0.012653
26.09	0.012745	0.012659	0.012653
26.12	0.012749	0.012669	0.012651
26.15	0.012746	0.012671	0.012651
26.18	0.012742	0.012669	0.01265
26.21	0.012744	0.012665	0.012653
26.24	0.012742	0.012672	0.012653
26.27	0.012746	0.012675	0.012655
26.3	0.012744	0.012671	0.01266
26.33	0.012731	0.012666	0.012656
26.36	0.012723	0.012665	0.012654
26.39	0.012725	0.012668	0.012664
26.42	0.012731	0.012672	0.01267
26.45	0.012724	0.01268	0.012668
26.48	0.01272	0.012684	0.012667
26.51	0.012725	0.01268	0.012666
26.54	0.012731	0.012686	0.012668
26.57	0.012739	0.012689	0.012673
26.6	0.012743	0.012696	0.012669
26.63	0.01274	0.012691	0.012662
26.66	0.012746	0.012682	0.012657
26.69	0.012752	0.012682	0.012656
26.72	0.01276	0.012684	0.012662
26.75	0.012765	0.012689	0.012648
26.78	0.012769	0.012691	0.012637
26.81	0.012771	0.012692	0.01263
26.84	0.012779	0.012686	0.012626
26.87	0.012794	0.012696	0.012627
26.9	0.01281	0.012701	0.012617
26.93	0.012817	0.012692	0.01261
26.96	0.012816	0.012691	0.012601
26.99	0.012822	0.012688	0.012596
27.02	0.012843	0.012687	0.012596
27.05	0.01286	0.012688	0.012599
27.08	0.01287	0.012692	0.012588
27.11	0.01287	0.01269	0.012582
27.14	0.012882	0.012689	0.012576
27.17	0.012893	0.012694	0.01259
27.2	0.012905	0.012694	0.012592
27.23	0.012913	0.012691	0.012599
27.26	0.012926	0.012693	0.012601
27.29	0.012939	0.012689	0.0126
27.32	0.012955	0.012694	0.01261
27.35	0.012987	0.012703	0.012622
27.38	0.013013	0.012707	0.01264
27.41	0.01304	0.012715	0.01265
27.44	0.013068	0.012731	0.012656
27.47	0.013111	0.012746	0.012676
27.5	0.013143	0.012771	0.012696
27.53	0.013175	0.012789	0.012704
27.56	0.013217	0.012805	0.012715
27.59	0.013254	0.01282	0.012732
27.62	0.013298	0.012839	0.012745
27.65	0.013359	0.012863	0.012763
27.68	0.013405	0.012895	0.012776
27.71	0.013469	0.012923	0.012793
27.74	0.01352	0.012936	0.012815
27.77	0.013582	0.012968	0.012829
27.8	0.013646	0.013004	0.012853
27.83	0.013712	0.013028	0.012874
27.86	0.013767	0.013064	0.012893
27.89	0.013831	0.013105	0.012914
27.92	0.013906	0.013155	0.012939
27.95	0.013978	0.013176	0.012973
27.98	0.014054	0.013211	0.013
28.01	0.014144	0.013263	0.013028
28.04	0.014228	0.013303	0.013068
28.07	0.014312	0.013363	0.0131
28.1	0.014397	0.013413	0.013144
28.13	0.014484	0.013466	0.01319
28.16	0.014585	0.013516	0.013235
28.19	0.014672	0.013573	0.013276
28.22	0.014785	0.013652	0.013327
28.25	0.014865	0.013718	0.013405
28.28	0.014965	0.013793	0.013465
28.31	0.015087	0.013865	0.013536
28.34	0.015188	0.013925	0.013587
28.37	0.0153	0.014005	0.013652
28.38	0.015318	0.014085	0.013749
28.4	0.015404	0.014191	0.013823
28.43	0.015501	0.014275	0.013913
28.46	0.015604	0.014365	0.013986
28.49	0.015701	0.014457	0.014056
28.52	0.015823	0.014543	0.014171
28.55	0.015929	0.014652	0.014269
28.58	0.016041	0.014755	0.014379
28.61	0.016123	0.014858	0.014485
28.64	0.016218	0.014975	0.014607
28.67	0.016337	0.015075	0.014712
28.7	0.016431	0.015183	0.01479
28.73	0.016553	0.015202	0.014934
28.76	0.016658	0.015286	0.015044
28.79	0.016761	0.015408	0.015169
28.82	0.016856	0.015513	0.015287
28.85	0.016957	0.015613	0.015412
28.88	0.017067	0.015743	0.015532
28.91	0.017157	0.015832	0.015647
28.94	0.017259	0.015953	0.015784
28.97	0.01735	0.01606	0.015899
29	0.017428	0.016167	0.016027
29.03	0.017524	0.016294	0.016175
29.06	0.017605	0.016398	0.016273
29.09	0.017701	0.016505	0.016419
29.12	0.017782	0.016608	0.016544
29.15	0.017863	0.016714	0.016667
29.18	0.017939	0.016839	0.016811
29.21	0.018013	0.016937	0.016931
29.24	0.01809	0.017056	0.017043
29.27	0.01815	0.017155	0.017062
29.3	0.018207	0.017238	0.017162
29.33	0.018267	0.017355	0.017302
29.36	0.018325	0.017454	0.017401
29.39	0.018369	0.017555	0.01752
29.42	0.018402	0.017639	0.017654
29.45	0.018459	0.017743	0.017758
29.48	0.01851	0.017819	0.017868
29.51	0.018554	0.017904	0.017973
29.54	0.018602	0.017991	0.018066
29.57	0.018626	0.018062	0.018166
29.6	0.01866	0.018153	0.018259
29.63	0.018686	0.018231	0.018368
29.66	0.018707	0.018289	0.018444
29.69	0.01873	0.018366	0.018511
29.72	0.018742	0.018424	0.018593
29.75	0.018752	0.018488	0.018676
29.78	0.018761	0.018546	0.018764
29.81	0.018762	0.0186	0.018826
29.84	0.018764	0.018641	0.018885
29.87	0.018762	0.018686	0.018939
29.9	0.018753	0.018726	0.018985
29.93	0.01875	0.018764	0.01905
29.96	0.018736	0.018807	0.019094
29.99	0.018714	0.018839	0.019127
30.02	0.018684	0.018867	0.019147
30.05	0.018645	0.018884	0.019177
30.08	0.018617	0.018902	0.019201
30.12	0.01858	0.018927	0.019214
30.14	0.018549	0.01893	0.019228
30.17	0.018508	0.018936	0.019232
30.2	0.018457	0.018922	0.019229
30.23	0.018408	0.018917	0.019226
30.26	0.018346	0.018919	0.019218
30.29	0.01829	0.018909	0.0192
30.32	0.018243	0.018891	0.019172
30.35	0.018177	0.018856	0.019135
30.38	0.018116	0.018828	0.0191
30.41	0.018047	0.0188	0.019077
30.44	0.017984	0.018766	0.019036
30.47	0.017915	0.01873	0.018986
30.5	0.017851	0.018678	0.018934
30.53	0.017787	0.018622	0.018896
30.56	0.017715	0.018568	0.018845
30.59	0.017646	0.018518	0.018793
30.62	0.017578	0.018469	0.018729
30.65	0.017486	0.018412	0.018654
30.68	0.017417	0.018352	0.018593
30.71	0.017342	0.018283	0.018537
30.74	0.017268	0.018221	0.018468
30.77	0.017185	0.018137	0.01839
30.8	0.017111	0.018084	0.018313
30.83	0.017041	0.018025	0.018237
30.86	0.016969	0.017953	0.018161
30.89	0.016906	0.017883	0.018078
30.92	0.016823	0.017804	0.017999
30.95	0.016752	0.017724	0.017896
30.98	0.016683	0.017662	0.017827
31.01	0.016607	0.017589	0.017745
31.04	0.016545	0.017518	0.017654
31.07	0.016476	0.017425	0.017571
31.1	0.016407	0.017351	0.017467
31.13	0.016343	0.017268	0.017385
31.16	0.016271	0.017213	0.017297
31.19	0.016211	0.01714	0.017217
31.22	0.01614	0.017048	0.017124
31.25	0.016089	0.016976	0.017023
31.28	0.016019	0.016889	0.016939
31.31	0.015963	0.016817	0.016841
31.34	0.015919	0.016752	0.016763
31.37	0.015852	0.01669	0.016696
31.4	0.015796	0.016614	0.016597
31.44	0.015735	0.016534	0.016516
31.46	0.015695	0.016477	0.016431
31.49	0.015648	0.016416	0.016344
31.52	0.01559	0.016338	0.016273
31.55	0.015541	0.016284	0.016197
31.58	0.015486	0.016215	0.016125
31.61	0.015444	0.016166	0.016042
31.64	0.015409	0.016104	0.015984
31.67	0.015357	0.01604	0.015908
31.7	0.015323	0.015988	0.015841
31.73	0.015277	0.015936	0.015785
31.76	0.015238	0.01588	0.015706
31.79	0.015199	0.015828	0.015636
31.82	0.015162	0.015781	0.015571
31.85	0.015117	0.015731	0.015503
31.88	0.015075	0.015667	0.015445
31.91	0.015043	0.015619	0.015385
31.94	0.015003	0.01558	0.015328
31.97	0.014975	0.015543	0.015273
32	0.014939	0.015493	0.015212
32.03	0.014904	0.015441	0.015166
32.06	0.014869	0.015402	0.015109
32.09	0.014843	0.015351	0.015074
32.12	0.014819	0.015321	0.015033
32.15	0.014785	0.015289	0.014982
32.18	0.014746	0.015247	0.014929
32.21	0.01473	0.015207	0.014889
32.24	0.014703	0.015176	0.014855
32.27	0.014684	0.015144	0.014822
32.3	0.014665	0.015109	0.014793
32.33	0.014636	0.015067	0.014747
32.36	0.014613	0.015037	0.014715
32.39	0.014588	0.015002	0.014687
32.42	0.014569	0.014967	0.014661
32.45	0.014541	0.014937	0.014633
32.48	0.014518	0.014916	0.014599
32.51	0.014499	0.014884	0.01457
32.54	0.014484	0.014856	0.014547
32.57	0.014472	0.014832	0.014522
32.6	0.014446	0.014806	0.014505
32.63	0.014427	0.014784	0.014464
32.66	0.014412	0.014761	0.014432
32.69	0.014393	0.014743	0.014397
32.72	0.014383	0.014727	0.014372
32.76	0.014368	0.014699	0.014338
32.78	0.014359	0.014674	0.0143
32.81	0.014343	0.014648	0.014272
32.84	0.01433	0.014619	0.01424
32.87	0.01433	0.014609	0.014228
32.9	0.014313	0.014596	0.014203
32.93	0.014299	0.014579	0.01417
32.96	0.014282	0.014555	0.01414
32.99	0.014258	0.014536	0.014117
33.02	0.014248	0.014527	0.014104
33.05	0.014227	0.014508	0.014082
33.08	0.01421	0.014491	0.014051
33.11	0.014189	0.014477	0.01403
33.14	0.014174	0.014456	0.014008
33.17	0.014163	0.014443	0.013987
33.2	0.014156	0.014428	0.01397
33.23	0.014139	0.014418	0.013955
33.26	0.014117	0.014401	0.013936
33.29	0.014109	0.014387	0.013922
33.32	0.014103	0.014378	0.01391
33.35	0.014092	0.014363	0.013902
33.38	0.014085	0.01434	0.013885
33.41	0.01407	0.014324	0.013866
33.44	0.014056	0.014311	0.013855
33.47	0.014051	0.014298	0.013845
33.5	0.014054	0.014285	0.013842
33.53	0.014049	0.014275	0.01383
33.56	0.014042	0.014263	0.013815
33.59	0.01404	0.014256	0.013811
33.62	0.014043	0.014243	0.013805
33.65	0.014047	0.014233	0.013791
33.68	0.014044	0.014229	0.013778
33.71	0.01404	0.014213	0.013767
33.74	0.014041	0.014194	0.013762
33.77	0.014044	0.014181	0.013749
33.8	0.014046	0.014176	0.013743
33.83	0.014045	0.014173	0.013741
33.86	0.014036	0.01417	0.013723
33.89	0.014033	0.014173	0.013705
33.92	0.014049	0.014163	0.013704
33.95	0.014067	0.014155	0.0137
33.98	0.014074	0.014149	0.013699
34.01	0.014087	0.014148	0.013698
34.04	0.014096	0.01415	0.013688
34.08	0.014101	0.014144	0.013682
34.1	0.014109	0.014142	0.01368
34.13	0.014124	0.014152	0.013675
34.16	0.014129	0.014158	0.013672
34.19	0.014142	0.014158	0.013673
34.22	0.014156	0.01416	0.013671
34.25	0.014176	0.014166	0.013674
34.28	0.014201	0.014172	0.013686
34.31	0.014221	0.014183	0.013694
34.34	0.014233	0.014188	0.013696
34.37	0.014256	0.014202	0.013697
34.4	0.014284	0.014212	0.013714
34.43	0.014314	0.014231	0.01373
34.46	0.014336	0.014246	0.013737
34.49	0.014362	0.014269	0.013752
34.52	0.014394	0.014291	0.013757
34.55	0.014429	0.014309	0.013777
34.58	0.014471	0.014341	0.013798
34.61	0.014503	0.014365	0.013819
34.64	0.014535	0.014382	0.013837
34.67	0.014586	0.0144	0.013867
34.7	0.014634	0.014429	0.0139
34.73	0.014691	0.014452	0.013928
34.76	0.014739	0.014476	0.01396
34.79	0.014794	0.014515	0.013993
34.82	0.014844	0.014543	0.014021
34.85	0.014892	0.014574	0.014052
34.88	0.014957	0.014615	0.014101
34.91	0.015007	0.014651	0.014141
34.94	0.015074	0.014691	0.014178
34.97	0.015146	0.014732	0.014239
35	0.015212	0.01477	0.014293
35.03	0.015277	0.014828	0.014352
35.06	0.015343	0.014878	0.014406
35.09	0.01542	0.014936	0.014458
35.12	0.015489	0.014975	0.014515
35.15	0.015552	0.015026	0.014567
35.18	0.015634	0.015104	0.014653
35.21	0.015699	0.015174	0.014728
35.21	0.015708	0.015243	0.014805
35.24	0.015777	0.015306	0.014885
35.27	0.015847	0.015376	0.014961
35.3	0.015911	0.01544	0.015044
35.33	0.015997	0.015522	0.015111
35.36	0.016073	0.015614	0.015188
35.4	0.016147	0.015679	0.015282
35.42	0.016192	0.015763	0.015357
35.45	0.016267	0.015846	0.01545
35.48	0.016334	0.015914	0.015524
35.51	0.016402	0.015999	0.015606
35.54	0.01648	0.016076	0.015703
35.57	0.016534	0.01609	0.015775
35.6	0.0166	0.016165	0.01587
35.63	0.016664	0.016244	0.015948
35.66	0.016721	0.016323	0.016016
35.69	0.016777	0.01641	0.016098
35.72	0.01683	0.016482	0.01617
35.75	0.016898	0.01657	0.016266
35.78	0.016939	0.016663	0.016352
35.81	0.017003	0.016764	0.01643
35.84	0.017058	0.016836	0.016488
35.87	0.017101	0.016899	0.01656
35.9	0.017161	0.016992	0.01664
35.93	0.017211	0.017079	0.016711
35.96	0.017267	0.017177	0.016784
35.99	0.017314	0.01726	0.016847
36.02	0.017358	0.017332	0.016908
36.05	0.017406	0.017417	0.016976
36.08	0.017439	0.017487	0.017035
36.11	0.017481	0.017572	0.017046
36.14	0.017511	0.017647	0.017103
36.17	0.017537	0.017713	0.01715
36.2	0.01757	0.017783	0.017196
36.23	0.017595	0.017841	0.017246
36.26	0.017625	0.017913	0.017282
36.29	0.017648	0.01797	0.017332
36.32	0.017658	0.018022	0.017372
36.35	0.017665	0.018074	0.017412
36.38	0.017677	0.018121	0.017441
36.41	0.017685	0.018174	0.017481
36.44	0.017689	0.018213	0.01751
36.47	0.017683	0.018254	0.01753
36.5	0.017671	0.018288	0.017551
36.53	0.017672	0.018322	0.017562
36.56	0.017661	0.018363	0.017577
36.59	0.017646	0.018388	0.017595
36.62	0.017616	0.0184	0.017588
36.65	0.017596	0.018418	0.017587
36.68	0.017572	0.018434	0.017589
36.72	0.017544	0.018443	0.017591
36.74	0.017522	0.018452	0.017589
36.77	0.017494	0.018462	0.017578
36.8	0.017461	0.018462	0.017544
36.83	0.017424	0.018458	0.017532
36.86	0.017387	0.018458	0.017512
36.89	0.017349	0.018443	0.017474
36.92	0.017314	0.018426	0.017445
36.95	0.017268	0.018407	0.017406
36.98	0.017227	0.018372	0.017367
37.01	0.017179	0.018353	0.01733
37.04	0.017133	0.018333	0.017299
37.07	0.017079	0.018296	0.017246
37.1	0.01704	0.018263	0.017185
37.13	0.016987	0.018224	0.017139
37.16	0.016947	0.018189	0.017076
37.19	0.016904	0.018152	0.01704
37.22	0.01685	0.018116	0.016986
37.25	0.016807	0.018075	0.016914
37.28	0.016744	0.018028	0.016855
37.31	0.016696	0.017984	0.016793
37.34	0.016653	0.017933	0.016733
37.37	0.016594	0.017879	0.016682
37.4	0.016546	0.01783	0.016618
37.43	0.01649	0.017764	0.016564
37.46	0.016441	0.017714	0.01648
37.49	0.016397	0.017662	0.016425
37.52	0.016335	0.017604	0.01636
37.55	0.016277	0.017554	0.016295
37.58	0.016228	0.0175	0.016245
37.61	0.016194	0.017441	0.016175
37.64	0.016147	0.017377	0.016118
37.67	0.016104	0.017328	0.016053
37.7	0.016061	0.017273	0.015991
37.73	0.016007	0.017211	0.015937
37.76	0.01597	0.017163	0.015888
37.79	0.015925	0.017101	0.015829
37.82	0.015893	0.017053	0.015765
37.85	0.015849	0.017002	0.015713
37.88	0.015797	0.016936	0.015661
37.91	0.015762	0.016876	0.015608
37.94	0.015713	0.016813	0.015572
37.97	0.015681	0.016762	0.015524
38	0.015645	0.016715	0.015473
38.04	0.015598	0.01666	0.015421
38.06	0.015566	0.016606	0.015358
38.09	0.015527	0.016542	0.015317
38.12	0.015484	0.016491	0.015263
38.15	0.015441	0.016447	0.015226
38.18	0.015392	0.016382	0.015168
38.21	0.015353	0.01633	0.015125
38.24	0.015309	0.016265	0.01508
38.27	0.01527	0.016209	0.015035
38.3	0.015226	0.016154	0.01499
38.33	0.01519	0.016108	0.014952
38.36	0.015154	0.016045	0.014917
38.39	0.015111	0.015987	0.014878
38.42	0.01509	0.01594	0.014838
38.45	0.015033	0.015896	0.014803
38.48	0.014992	0.015847	0.014758
38.51	0.014961	0.015794	0.01473
38.54	0.014919	0.015743	0.014693
38.57	0.014888	0.015703	0.014655
38.6	0.014862	0.015643	0.014618
38.63	0.014835	0.015596	0.014583
38.66	0.014806	0.015554	0.014557
38.69	0.014781	0.015505	0.014519
38.72	0.014757	0.015464	0.014488
38.75	0.014731	0.015418	0.01446
38.78	0.014704	0.01537	0.014421
38.81	0.014688	0.015321	0.014387
38.84	0.014652	0.01529	0.014373
38.87	0.014632	0.015249	0.01435
38.9	0.014599	0.015212	0.014321
38.93	0.014571	0.01518	0.014292
38.96	0.014545	0.015131	0.014258
38.99	0.014523	0.015103	0.014222
39.02	0.014507	0.01507	0.0142
39.05	0.014492	0.015031	0.014171
39.08	0.014459	0.015008	0.014144
39.11	0.014422	0.014961	0.01411
39.14	0.014391	0.014927	0.014082
39.17	0.01437	0.014889	0.014066
39.2	0.014338	0.014851	0.01405
39.23	0.014312	0.014815	0.014015
39.26	0.014275	0.014771	0.013987
39.29	0.014245	0.014739	0.013956
39.32	0.014221	0.014702	0.013946
39.36	0.01421	0.014667	0.013921
39.38	0.014195	0.014628	0.013892
39.41	0.014171	0.014584	0.013872
39.44	0.01416	0.014561	0.013856
39.47	0.01414	0.014536	0.013846
39.5	0.014125	0.014509	0.013824
39.53	0.014117	0.014482	0.01381
39.56	0.014099	0.014452	0.013792
39.59	0.01408	0.014424	0.013766
39.62	0.014076	0.014406	0.013753
39.65	0.014063	0.014397	0.01374
39.68	0.01405	0.014376	0.013727
39.71	0.014043	0.014354	0.013713
39.74	0.014037	0.014333	0.013699
39.77	0.014017	0.014313	0.013683
39.8	0.014005	0.014303	0.013674
39.83	0.013991	0.014295	0.013662
39.86	0.013972	0.014274	0.013659
39.89	0.013959	0.014249	0.013655
39.92	0.013952	0.014226	0.013647
39.95	0.013945	0.014219	0.013633
39.98	0.013942	0.014207	0.013625
40.01	0.01393	0.014189	0.01361
40.04	0.013923	0.014173	0.013597
40.07	0.013909	0.014156	0.013593
40.1	0.013902	0.014142	0.013595
40.13	0.013892	0.014128	0.013583
40.16	0.013876	0.014111	0.01357
40.19	0.013866	0.014092	0.013558
40.22	0.013868	0.014073	0.013554
40.25	0.013874	0.014059	0.013549
40.28	0.013867	0.014049	0.013545
40.31	0.013851	0.014044	0.013539
40.34	0.013848	0.014045	0.013536
40.37	0.013849	0.014043	0.013534
40.4	0.013847	0.014043	0.013539
40.43	0.013852	0.014045	0.013532
40.46	0.013845	0.014046	0.013531
40.49	0.01385	0.014039	0.013526
40.52	0.01386	0.014029	0.013528
40.55	0.013857	0.014026	0.013531
40.58	0.013867	0.014017	0.013538
40.61	0.013869	0.014017	0.013541
40.64	0.013866	0.014025	0.013536
40.67	0.013861	0.014036	0.013543
40.7	0.013858	0.014048	0.013544
40.73	0.013852	0.014054	0.013553
40.76	0.01385	0.014062	0.013551
40.79	0.013845	0.014067	0.013554
40.82	0.013855	0.014057	0.01356
40.85	0.013863	0.014061	0.013564
40.88	0.013866	0.014064	0.013576
40.91	0.013872	0.014066	0.013572
40.94	0.013869	0.014068	0.013568
40.97	0.013872	0.014072	0.013569
41	0.013864	0.014071	0.013572
41.03	0.013852	0.014069	0.013561
41.06	0.013852	0.014065	0.013559
41.09	0.01384	0.014063	0.013557
41.12	0.013831	0.014065	0.01355
41.15	0.01383	0.014063	0.013546
41.18	0.013818	0.014062	0.013551
41.21	0.013823	0.014055	0.013555
41.24	0.013819	0.014046	0.013548
41.27	0.013814	0.014043	0.013544
41.3	0.01382	0.01404	0.013548
41.33	0.013819	0.014044	0.013553
41.36	0.013815	0.014046	0.013553
41.39	0.013807	0.014038	0.013549
41.42	0.013795	0.014037	0.01355
41.45	0.013783	0.014042	0.013549
41.48	0.013784	0.014046	0.013553
41.51	0.013781	0.014043	0.013564
41.54	0.013771	0.014047	0.013566
41.57	0.013771	0.014055	0.013576
41.6	0.013773	0.014057	0.013578
41.63	0.013778	0.014062	0.013594
41.66	0.013771	0.014073	0.013606
41.69	0.01377	0.014071	0.013599
41.72	0.013769	0.014076	0.013594
41.75	0.013763	0.014073	0.013609
41.78	0.013766	0.014068	0.013605
41.81	0.013773	0.014067	0.013603
41.84	0.01377	0.014063	0.013602
41.87	0.013761	0.014067	0.013594
41.9	0.01376	0.014074	0.013594
41.93	0.01375	0.014086	0.013587
41.96	0.013742	0.014097	0.013587
41.99	0.013738	0.014092	0.013584
42.02	0.013723	0.014087	0.013572
42.05	0.013712	0.014084	0.013567
42.06	0.01371	0.014077	0.013554
42.08	0.013707	0.014059	0.013549
42.11	0.013686	0.014051	0.013536
42.14	0.013684	0.014038	0.013529
42.17	0.013678	0.01402	0.013509
42.2	0.013669	0.014009	0.013503
42.23	0.013672	0.013987	0.013496
42.26	0.013668	0.013965	0.013492
42.29	0.013669	0.013937	0.013481
42.32	0.013663	0.01392	0.013465
42.35	0.013659	0.01389	0.013461
42.38	0.01366	0.013869	0.013458
42.41	0.013672	0.013868	0.013454
42.44	0.013682	0.013851	0.01345
42.47	0.013684	0.013821	0.013457
42.5	0.013695	0.013796	0.013452
42.53	0.013708	0.013781	0.013446
42.56	0.013719	0.013748	0.013432
42.59	0.013719	0.013721	0.013421
42.62	0.013712	0.013702	0.013423
42.65	0.013703	0.013682	0.013423
42.68	0.0137	0.013669	0.013426
42.71	0.013708	0.013643	0.013431
42.74	0.013704	0.013613	0.013431
42.77	0.013697	0.013582	0.013423
42.8	0.013695	0.013548	0.013426
42.83	0.013689	0.013514	0.013418
42.86	0.013684	0.013492	0.013413
42.89	0.013685	0.013459	0.013408
42.92	0.013685	0.013428	0.013397
42.95	0.013679	0.013402	0.013399
42.98	0.013671	0.013364	0.013399
43.01	0.013658	0.013354	0.013401
43.04	0.013659	0.01335	0.013401
43.07	0.013661	0.013345	0.013389
43.1	0.013658	0.013338	0.013382
43.13	0.013665	0.013342	0.013386
43.16	0.013668	0.013343	0.013389
43.19	0.013671	0.013353	0.013385
43.22	0.013675	0.01338	0.01338
43.25	0.013664	0.0134	0.013379
43.28	0.013665	0.01344	0.013382
43.31	0.013672	0.013488	0.013384
43.34	0.013674	0.013525	0.013384
43.37	0.013666	0.013575	0.013392
43.4	0.013668	0.013618	0.0134
43.43	0.013675	0.013658	0.013394
43.46	0.013679	0.013701	0.013393
43.49	0.013695	0.013748	0.013394
43.52	0.013703	0.013776	0.013397
43.55	0.013689	0.013794	0.013399
43.58	0.01369	0.013825	0.013399
43.61	0.013689	0.013846	0.013398
43.64	0.013693	0.013863	0.013401
43.67	0.01369	0.01388	0.013406
43.7	0.013695	0.013891	0.013417
43.73	0.013707	0.013887	0.013404
43.76	0.013706	0.013883	0.013403
43.79	0.0137	0.013876	0.013404
43.82	0.013702	0.013872	0.013401
43.85	0.013699	0.013873	0.013405
43.88	0.013687	0.013856	0.013395
43.91	0.013691	0.013858	0.013385
43.94	0.013687	0.01385	0.013385
43.97	0.013683	0.013842	0.013386
44	0.013676	0.013832	0.013382
44.03	0.013676	0.013821	0.013376
44.06	0.013675	0.013809	0.013368
44.09	0.013661	0.013795	0.013368
44.12	0.013655	0.013786	0.01338
44.15	0.013648	0.01378	0.013385
44.18	0.013642	0.013777	0.013385
44.21	0.013637	0.01377	0.013387
44.24	0.013645	0.01377	0.013395
44.27	0.013644	0.013768	0.013395
44.3	0.013626	0.013776	0.0134
44.33	0.01362	0.013769	0.013407
44.36	0.013618	0.013766	0.013407
44.39	0.013613	0.013767	0.013416
44.42	0.013623	0.013775	0.013426
44.45	0.013624	0.01377	0.013447
44.48	0.013618	0.013767	0.013448
44.51	0.013628	0.013775	0.013444
44.54	0.013639	0.01378	0.013445
44.57	0.013642	0.013791	0.013454
44.6	0.013646	0.013799	0.013456
44.63	0.013652	0.013791	0.013449
44.66	0.01366	0.013791	0.013448
44.69	0.013661	0.013807	0.013449
44.72	0.013669	0.013818	0.01345
44.75	0.013677	0.013816	0.013452
44.78	0.013671	0.013811	0.013455
44.81	0.013684	0.013816	0.013444
44.84	0.013691	0.013824	0.013435
44.87	0.013687	0.013822	0.01343
44.9	0.013693	0.013815	0.013419
44.93	0.013699	0.013803	0.013406
44.96	0.013693	0.013797	0.013402
44.99	0.013699	0.013795	0.01339
45.02	0.0137	0.013788	0.013385
45.05	0.013713	0.01378	0.013385
45.08	0.013722	0.013773	0.013377
45.11	0.013714	0.013768	0.013371
45.14	0.013713	0.013777	0.013378
45.17	0.013723	0.013786	0.01339
45.2	0.013723	0.013796	0.013393
45.23	0.013718	0.013793	0.013392
45.26	0.013716	0.013785	0.013389
45.29	0.013717	0.013791	0.013395
45.32	0.013718	0.01379	0.013403
45.35	0.013718	0.013794	0.013417
45.38	0.013721	0.013794	0.013434
45.41	0.013723	0.013795	0.013434
45.44	0.013723	0.013796	0.01345
45.47	0.013718	0.0138	0.013461
45.5	0.013718	0.013805	0.013469
45.53	0.013715	0.013811	0.013479
45.56	0.013714	0.013812	0.01348
45.59	0.013719	0.01381	0.013496
45.62	0.013728	0.013817	0.013488
45.65	0.013736	0.013813	0.013494
45.68	0.013742	0.013811	0.013495
45.71	0.013748	0.013816	0.013494
45.74	0.013753	0.01383	0.013495
45.77	0.013758	0.013833	0.013487
45.8	0.013753	0.013833	0.013491
45.83	0.013752	0.013833	0.013494
45.86	0.013754	0.013833	0.013481
45.89	0.013741	0.013828	0.013473
45.92	0.013729	0.013827	0.013479
45.95	0.013725	0.013833	0.013482
45.98	0.013717	0.013832	0.013474
46.01	0.013703	0.013817	0.013479
46.04	0.013693	0.013815	0.01349
46.07	0.013683	0.01381	0.013497
46.1	0.01368	0.013815	0.013498
46.13	0.013665	0.01382	0.013504
46.16	0.013656	0.013818	0.013516
46.19	0.013641	0.013818	0.013511
46.22	0.013629	0.013807	0.013517
46.25	0.01362	0.01381	0.013532
46.28	0.013602	0.013798	0.01354
46.31	0.013593	0.013787	0.013534
46.34	0.01359	0.013775	0.013538
46.37	0.0136	0.013773	0.013553
46.4	0.013612	0.013779	0.013553
46.43	0.013614	0.013769	0.013555
46.46	0.013618	0.01376	0.013568
46.49	0.013612	0.013752	0.013571
46.52	0.013618	0.013746	0.013575
46.56	0.013629	0.013753	0.013573
46.58	0.013639	0.013758	0.013574
46.61	0.013646	0.013757	0.013567
46.64	0.013659	0.013752	0.013561
46.67	0.013661	0.013756	0.013551
46.7	0.013664	0.013756	0.013549
46.73	0.013677	0.013765	0.013548
46.76	0.013682	0.013763	0.013522
46.79	0.013685	0.013765	0.013517
46.82	0.013694	0.013762	0.013512
46.85	0.013706	0.013766	0.013511
46.88	0.013712	0.013771	0.013515
46.91	0.013714	0.013781	0.013511
46.94	0.013714	0.013791	0.013509
46.97	0.013707	0.013788	0.013517
47	0.013713	0.013784	0.013516
47.03	0.013718	0.013795	0.01353
47.06	0.013711	0.013794	0.013546
47.09	0.013708	0.013788	0.013553
47.12	0.013703	0.013792	0.013565
47.15	0.01371	0.013793	0.013591
47.18	0.013709	0.013796	0.013604
47.21	0.013714	0.013794	0.013631
47.24	0.013721	0.013798	0.01365
47.27	0.013727	0.013796	0.013676
47.3	0.013743	0.013805	0.013713
47.33	0.01376	0.013811	0.013747
47.36	0.013774	0.013825	0.013772
47.39	0.01379	0.013841	0.013783
47.42	0.013809	0.013843	0.013816
47.45	0.013834	0.013862	0.013846
47.48	0.013865	0.013876	0.013889
47.51	0.013901	0.013895	0.013906
47.54	0.01393	0.013906	0.013927
47.57	0.013971	0.013925	0.013942
47.6	0.014022	0.01395	0.013969
47.63	0.014061	0.013975	0.014001
47.66	0.0141	0.014012	0.01402
47.69	0.014136	0.01405	0.014043
47.72	0.014179	0.014087	0.014065
47.75	0.014235	0.014118	0.0141
47.78	0.014275	0.014155	0.014139
47.81	0.014324	0.014205	0.014166
47.84	0.014357	0.014242	0.014199
47.87	0.014399	0.014283	0.01423
47.9	0.014445	0.01433	0.014268
47.93	0.014495	0.014385	0.014311
47.96	0.014549	0.014433	0.014343
47.99	0.014587	0.014476	0.014385
48.02	0.014614	0.014526	0.014419
48.05	0.014646	0.014589	0.014458
48.08	0.014687	0.014664	0.014517
48.11	0.014738	0.014731	0.014569
48.14	0.014786	0.014787	0.014617
48.17	0.014828	0.014843	0.014671
48.2	0.014886	0.014897	0.014718
48.23	0.014921	0.014969	0.014789
48.26	0.014973	0.015062	0.014848
48.29	0.015021	0.015136	0.014909
48.32	0.015093	0.015204	0.014978
48.35	0.015153	0.015269	0.015039
48.38	0.015207	0.015349	0.015128
48.41	0.015266	0.015446	0.01518
48.44	0.015328	0.015527	0.015243
48.47	0.015397	0.01563	0.015317
48.5	0.01545	0.015694	0.01538
48.53	0.015514	0.01577	0.015456
48.56	0.015585	0.01589	0.015522
48.59	0.015647	0.015983	0.015584
48.62	0.015703	0.016084	0.015665
48.65	0.01575	0.016175	0.015723
48.68	0.015817	0.01626	0.015795
48.71	0.01587	0.016348	0.015845
48.74	0.01592	0.016435	0.01592
48.77	0.015978	0.016527	0.015965
48.8	0.01601	0.016611	0.016026
48.83	0.016058	0.016696	0.016089
48.86	0.016108	0.016779	0.016143
48.89	0.016161	0.016847	0.016197
48.92	0.016203	0.016926	0.016247
48.93	0.016207	0.01699	0.016298
48.95	0.016233	0.017081	0.01635
48.98	0.016268	0.017158	0.016405
49.01	0.016305	0.01722	0.016448
49.04	0.016332	0.017276	0.016497
49.07	0.016365	0.017333	0.016542
49.1	0.016397	0.017404	0.016594
49.13	0.016421	0.017457	0.016631
49.16	0.016442	0.017507	0.016669
49.19	0.016467	0.017568	0.016701
49.22	0.016493	0.017621	0.016727
49.25	0.016502	0.01767	0.016753
49.28	0.016523	0.017678	0.016774
49.31	0.016551	0.017715	0.01679
49.34	0.016564	0.017759	0.016804
49.37	0.016571	0.01779	0.016821
49.4	0.01658	0.017829	0.016827
49.43	0.01659	0.017873	0.016837
49.46	0.016587	0.017891	0.016848
49.49	0.016594	0.017925	0.016845
49.52	0.016596	0.017943	0.016846
49.55	0.016596	0.017964	0.016841
49.58	0.016611	0.017975	0.016828
49.61	0.01662	0.017982	0.016803
49.64	0.016618	0.017987	0.016789
49.67	0.016608	0.01799	0.016763
49.7	0.016592	0.017988	0.016749
49.73	0.016585	0.017976	0.016726
49.76	0.016573	0.017966	0.016713
49.79	0.016554	0.017949	0.0167
49.82	0.016531	0.017937	0.016698
49.85	0.016508	0.017919	0.016677
49.88	0.01649	0.017889	0.016643
49.91	0.016469	0.017874	0.016614
49.94	0.016447	0.017856	0.016586
49.97	0.016418	0.017828	0.016566
50	0.016387	0.017792	0.016536
50.03	0.016354	0.017767	0.016509
50.06	0.016323	0.01773	0.016458
50.09	0.016305	0.017695	0.016441
50.12	0.016282	0.017652	0.016417
50.15	0.016245	0.017591	0.016376
50.18	0.016215	0.01756	0.01634
50.21	0.016191	0.01752	0.016301
50.24	0.016163	0.017483	0.01627
50.27	0.01614	0.017436	0.016243
50.3	0.016119	0.017385	0.016213
50.33	0.016096	0.017345	0.016178
50.36	0.016073	0.017296	0.016133
50.39	0.016045	0.017248	0.016108
50.42	0.016016	0.017193	0.01607
50.45	0.015999	0.017138	0.016036
50.48	0.015983	0.017095	0.016015
50.51	0.015964	0.017052	0.015973
50.54	0.015944	0.017002	0.015941
50.57	0.015928	0.016959	0.015915
50.6	0.015925	0.016918	0.015891
50.63	0.015914	0.016875	0.015851
50.67	0.015897	0.016842	0.015815
50.69	0.015883	0.016814	0.0158
50.72	0.01586	0.016789	0.015768
50.75	0.015827	0.016742	0.015739
50.78	0.015807	0.016708	0.015712
50.81	0.015778	0.016667	0.015689
50.84	0.015758	0.016638	0.015669
50.87	0.015748	0.016598	0.015657
50.9	0.015718	0.016555	0.015645
50.93	0.01568	0.016532	0.015627
50.96	0.015645	0.016504	0.015613
50.99	0.015626	0.016481	0.015609
51.02	0.015597	0.016446	0.015605
51.05	0.01557	0.016409	0.015601
51.08	0.015544	0.01638	0.015588
51.11	0.015522	0.016351	0.015582
51.14	0.015507	0.016321	0.015588
51.17	0.015501	0.016292	0.015575
51.2	0.015497	0.01628	0.015567
51.23	0.015482	0.016259	0.015574
51.26	0.015452	0.016233	0.01558
51.29	0.015437	0.016217	0.015584
51.32	0.015427	0.01622	0.015593
51.35	0.015411	0.016213	0.015593
51.38	0.0154	0.016214	0.015586
51.41	0.015387	0.016198	0.015577
51.44	0.015381	0.016197	0.015571
51.47	0.015373	0.016202	0.015576
51.5	0.015366	0.016202	0.015578
51.53	0.015358	0.016205	0.015565
51.56	0.015354	0.016208	0.015555
51.59	0.015354	0.016208	0.015562
51.62	0.015355	0.016214	0.015569
51.65	0.015347	0.016223	0.015565
51.68	0.015343	0.016229	0.015574
51.71	0.015336	0.016234	0.015577
51.74	0.015338	0.01624	0.015577
51.77	0.015338	0.016237	0.01558
51.8	0.015338	0.016236	0.015594
51.83	0.015337	0.016247	0.015616
51.86	0.015338	0.01626	0.015632
51.89	0.015329	0.016258	0.015653
51.92	0.015331	0.016267	0.015667
51.95	0.015343	0.016278	0.015684
51.99	0.015328	0.016277	0.015701
52.01	0.015321	0.016282	0.015722
52.04	0.015324	0.016284	0.015742
52.07	0.015319	0.016288	0.015762
52.1	0.015308	0.016297	0.015775
52.13	0.015284	0.016302	0.015793
52.16	0.015252	0.016305	0.015813
52.19	0.015236	0.016317	0.015832
52.22	0.015231	0.016321	0.015851
52.25	0.015247	0.016326	0.015864
52.28	0.015262	0.016323	0.015871
52.31	0.015287	0.016335	0.015873
52.34	0.01532	0.016352	0.015882
52.37	0.015348	0.016356	0.015885
52.4	0.015392	0.01637	0.015895
52.43	0.015434	0.016389	0.015903
52.46	0.015462	0.016391	0.015897
52.49	0.015496	0.016391	0.015896
52.52	0.015531	0.016407	0.015906
52.55	0.015572	0.016423	0.015898
52.58	0.015617	0.016442	0.015898
52.61	0.01566	0.016445	0.015897
52.64	0.015714	0.01645	0.015904
52.67	0.015761	0.016456	0.015902
52.7	0.015807	0.016461	0.015896
52.73	0.015845	0.016461	0.015897
52.76	0.015863	0.016472	0.015897
52.79	0.01588	0.016492	0.015881
52.82	0.015878	0.016502	0.015879
52.85	0.015888	0.016507	0.015886
52.88	0.015884	0.016505	0.015881
52.91	0.015872	0.016502	0.01588
52.94	0.015855	0.01649	0.015876
52.97	0.015851	0.016483	0.015868
53	0.015842	0.016475	0.015856
53.03	0.015833	0.016456	0.015858
53.06	0.015826	0.01644	0.015851
53.09	0.01581	0.016427	0.015846
53.12	0.015807	0.016412	0.015833
53.15	0.015798	0.016389	0.015817
53.18	0.015798	0.016376	0.015804
53.21	0.015796	0.01636	0.015791
53.24	0.015781	0.016339	0.015777
53.27	0.015775	0.016323	0.015768
53.31	0.015769	0.016302	0.015761
53.33	0.015763	0.016278	0.015742
53.36	0.01576	0.016251	0.01572
53.39	0.015741	0.01622	0.015709
53.42	0.015733	0.016209	0.015678
53.45	0.015733	0.016198	0.015658
53.48	0.015722	0.016194	0.015642
53.51	0.015701	0.016189	0.015615
53.54	0.015706	0.016177	0.015591
53.57	0.015694	0.016169	0.015572
53.6	0.015684	0.016151	0.015563
53.63	0.015674	0.016142	0.015546
53.66	0.015672	0.016127	0.015526
53.69	0.01566	0.016108	0.015516
53.72	0.015633	0.016093	0.015506
53.75	0.015621	0.016078	0.015498
53.78	0.01561	0.016075	0.015494
53.81	0.015598	0.01607	0.015487
53.84	0.015588	0.016053	0.015472
53.87	0.015574	0.016026	0.015457
53.9	0.015556	0.015999	0.015453
53.93	0.015533	0.015987	0.015466
53.96	0.015525	0.015964	0.015465
53.99	0.015514	0.015943	0.015455
54.02	0.01551	0.015923	0.015439
54.05	0.015493	0.015907	0.015443
54.08	0.015487	0.015895	0.015446
54.11	0.015472	0.01587	0.015452
54.14	0.015466	0.015852	0.015455
54.17	0.015453	0.015845	0.015445
54.2	0.015438	0.01584	0.015449
54.23	0.015439	0.015824	0.015446
54.26	0.015439	0.015817	0.015438
54.29	0.015441	0.015814	0.01543
54.32	0.015443	0.015795	0.015417
54.35	0.015434	0.015789	0.015409
54.38	0.015428	0.015788	0.015389
54.41	0.015424	0.015797	0.015381
54.44	0.015425	0.015796	0.015383
54.47	0.015419	0.015796	0.015388
54.5	0.015412	0.015793	0.015377
54.53	0.015411	0.015791	0.015388
54.56	0.015408	0.015794	0.015406
54.59	0.015396	0.015798	0.015408
54.63	0.015385	0.015794	0.015402
54.65	0.015378	0.015795	0.015404
54.68	0.015384	0.015793	0.015401
54.71	0.015371	0.015794	0.0154
54.74	0.015352	0.015789	0.015403
54.77	0.015339	0.015776	0.015396
54.8	0.015318	0.015761	0.015393
54.83	0.015309	0.015764	0.01541
54.86	0.015302	0.015749	0.015412
54.89	0.015297	0.015734	0.01542
54.92	0.015292	0.015722	0.015435
54.95	0.015273	0.015719	0.015433
54.98	0.015258	0.015702	0.015443
55.01	0.015255	0.015702	0.015455
55.04	0.015247	0.015702	0.015457
55.07	0.015232	0.015693	0.015448
55.1	0.015225	0.015687	0.015452
55.13	0.01522	0.015677	0.015449
55.16	0.015217	0.015672	0.015439
55.19	0.015223	0.015667	0.015438
55.22	0.015218	0.015671	0.015435
55.25	0.015219	0.015667	0.015416
55.28	0.015219	0.015655	0.015408
55.31	0.015237	0.015667	0.015405
55.34	0.015237	0.015676	0.015401
55.37	0.015245	0.015679	0.015398
55.4	0.015237	0.015683	0.01539
55.43	0.015235	0.015683	0.015378
55.46	0.015245	0.015689	0.015375
55.49	0.015257	0.015697	0.01537
55.52	0.01526	0.015692	0.015379
55.55	0.015263	0.015691	0.015379
55.58	0.015267	0.015693	0.015379
55.61	0.015268	0.015687	0.01539
55.64	0.015267	0.015695	0.015405
55.67	0.015263	0.0157	0.015405
55.7	0.015258	0.015703	0.01541
55.73	0.01526	0.015697	0.015415
55.76	0.015263	0.015706	0.015422
55.76	0.015262	0.015721	0.01545
55.79	0.015266	0.015719	0.015473
55.82	0.01527	0.015709	0.015499
55.85	0.01527	0.015707	0.015521
55.88	0.015265	0.015709	0.015549
55.91	0.015262	0.015732	0.015577
55.95	0.015266	0.015745	0.015599
55.97	0.015269	0.015751	0.015635
56	0.015266	0.015763	0.015669
56.03	0.015268	0.01578	0.015712
56.06	0.01528	0.015813	0.015739
56.09	0.015289	0.015843	0.015762
56.12	0.015297	0.015847	0.015802
56.15	0.015308	0.015871	0.015844
56.18	0.015326	0.015908	0.015899
56.21	0.015346	0.015943	0.015949
56.24	0.015378	0.015992	0.016015
56.27	0.01541	0.016061	0.01606
56.3	0.015438	0.016122	0.01611
56.33	0.015457	0.016188	0.016189
56.36	0.015484	0.01627	0.016263
56.39	0.015518	0.016347	0.016344
56.42	0.015552	0.016435	0.016434
56.45	0.015593	0.016518	0.016519
56.48	0.015622	0.016611	0.016605
56.51	0.015663	0.016717	0.016701
56.54	0.015702	0.016823	0.016823
56.57	0.01575	0.01693	0.016928
56.6	0.015802	0.017055	0.017041
56.63	0.015853	0.017136	0.017179
56.66	0.015908	0.017274	0.017197
56.69	0.015964	0.017399	0.017282
56.72	0.016021	0.017519	0.017433
56.75	0.016106	0.017673	0.017557
56.78	0.016164	0.017812	0.017705
56.81	0.016245	0.017938	0.017873
56.84	0.016331	0.018091	0.018013
56.87	0.01643	0.018249	0.018162
56.9	0.016508	0.018424	0.018316
56.93	0.016602	0.018582	0.018477
56.96	0.016719	0.018777	0.018617
56.99	0.016816	0.018917	0.018768
57.02	0.016932	0.019123	0.018942
57.05	0.017059	0.019292	0.019084
57.08	0.017159	0.01946	0.019229
57.11	0.017301	0.019661	0.019371
57.14	0.017422	0.019824	0.019487
57.17	0.017568	0.020027	0.019654
57.2	0.01769	0.020169	0.01979
57.23	0.017824	0.020333	0.019907
57.27	0.017973	0.020514	0.02002
57.29	0.018074	0.020661	0.020147
57.32	0.018225	0.020833	0.020272
57.35	0.018364	0.020982	0.020386
57.38	0.01849	0.021096	0.020494
57.41	0.018631	0.021249	0.020579
57.44	0.018755	0.021367	0.020657
57.47	0.018889	0.021499	0.020729
57.5	0.019027	0.021615	0.020789
57.53	0.019147	0.021733	0.020872
57.56	0.019302	0.021798	0.020938
57.59	0.019424	0.021877	0.020999
57.62	0.019576	0.021963	0.021043
57.65	0.019685	0.022039	0.021076
57.68	0.019833	0.022119	0.021122
57.71	0.019946	0.022176	0.021153
57.74	0.020055	0.02223	0.021176
57.77	0.020181	0.022279	0.021183
57.8	0.020283	0.022335	0.021181
57.83	0.020368	0.022369	0.021175
57.86	0.020456	0.02239	0.02117
57.89	0.020535	0.022408	0.02115
57.92	0.020625	0.022433	0.021136
57.95	0.020705	0.022433	0.021102
57.98	0.020776	0.022416	0.021073
58.01	0.020841	0.022408	0.021048
58.04	0.020877	0.022384	0.021009
58.07	0.020931	0.022372	0.020971
58.1	0.020971	0.022344	0.020925
58.13	0.021011	0.022302	0.020871
58.16	0.021039	0.022258	0.020818
58.19	0.021057	0.022203	0.020761
58.22	0.021076	0.022151	0.020703
58.25	0.021087	0.022093	0.020632
58.28	0.021093	0.02203	0.020573
58.31	0.021085	0.021972	0.020521
58.34	0.021071	0.021892	0.020452
58.37	0.021058	0.021814	0.020396
58.4	0.021041	0.021741	0.020338
58.43	0.021017	0.021661	0.02028
58.46	0.020982	0.021591	0.020219
58.49	0.020943	0.021491	0.020161
58.52	0.020902	0.021425	0.020119
58.55	0.020861	0.021342	0.020068
58.59	0.020803	0.021247	0.020024
58.61	0.020768	0.021168	0.019979
58.64	0.020702	0.021077	0.019931
58.67	0.020645	0.020994	0.01989
58.7	0.020586	0.020929	0.019849
58.73	0.020523	0.02087	0.019816
58.76	0.020462	0.0208	0.019794
58.79	0.020379	0.020718	0.019768
58.82	0.02031	0.020666	0.01975
58.85	0.020236	0.020595	0.019726
58.88	0.020171	0.020551	0.019714
58.91	0.020111	0.020491	0.019699
58.94	0.020036	0.020436	0.019688
58.97	0.019982	0.020396	0.019686
59	0.019915	0.020354	0.01968
59.03	0.019857	0.020326	0.019671
59.06	0.019806	0.020299	0.019658
59.09	0.019745	0.020274	0.019659
59.12	0.019686	0.020256	0.019662
59.15	0.019639	0.020239	0.019667
[truncated: 1,001 more rows]

## Sheet: Fig. 2
PANEL C
		WT			KO1			KO2
	CCND3	1	1	1	0.434544	0.635008	0.698541	0.901525	0.950662	1.46996
	NCAPH2	1	1	1	1.23503	0.991032	0.79771	0.966325	0.835166	0.882334
	PPFIA1	1	1	1	0.887255	0.847886	0.748832	0.675737	0.866437	0.768795
	RPS6KB2	1	1	1	0.918291	0.583719	0.846576	0.764963	0.808219	0.775246
	Dunnett's multiple comparisons test	Summary	Adjusted P Value
	CCND3
	WT vs. KO1	**	0.0019
	WT vs. KO2	ns	0.5249
	NCAPH2
	WT vs. KO1	ns	0.9962
	WT vs. KO2	ns	0.5366
	PPFIA1
	WT vs. KO1	ns	0.2218
	WT vs. KO2	ns	0.0842
	RPS6KB2
	WT vs. KO1	ns	0.1054
	WT vs. KO2	ns	0.1053
PANEL D
		WT			KO1			KO2
	CCND3	1.52751	0.868704	0.603788	0.967488	0.84391	1.16771	0.497014	0.39089	0.649846
	NCAPH2	1.23185	0.98943	0.778718	0.453105	0.526815	0.952879	0.425432	0.551295	0.7488
	PPFIA1	1.38334	0.904149	0.71251	0.628167	0.513694	1.00057	0.439088	0.38695	0.824444
	RPS6KB2	1.56753	0.674744	0.757721	0.493777	0.630476	0.187435	0.204869	0.0813439	0.132973
	Dunnett's multiple comparisons test	Summary	Adjusted P Value
	CCND3
	WT vs. KO1	ns	0.9993
	WT vs. KO2	ns	0.0818
	NCAPH2
	WT vs. KO1	ns	0.2328
	WT vs. KO2	ns	0.1377
	PPFIA1
	WT vs. KO1	ns	0.3724
	WT vs. KO2	ns	0.1123
	RPS6KB2
	WT vs. KO1	*	0.0416
	WT vs. KO2	**	0.002
PANEL E
		WT			KO1			KO2
	LMNB1	1	1	1	1	1	1	1	1	1
	CCND3	1	1	1	1.64919	1.04513	1.2255	1.65265	1.26291	1.05216
	TEAD2	1	1	1	0.881699	0.728173	0.710413	1.23874	1.30523	1.3377
	TRAF7	1	1	1	1.06518	1.19638	1.1996	2.04817	1.65738	2.3265
	MXRA7	1	1	1	0.83606	0.823775	0.772574	1.45538	1.59845	1.53162
	SP140L	1	1	1	1.15744	0.722301	0.731726	1.24246	1.22018	1.2174
	CCDC125	1	1	1	0.843692	0.749894	0.794186	1.17557	1.41532	1.21432
	PIGG	1	1	1	1.05604	0.941325	1.26845	1.93303	1.28601	1.70369
	SCRN2	1	1	1	1.04449	0.976216	0.800643	1.01159	1.47495	1.33554
	RPS6KB2	1	1	1	1.45506	1.01396	0.915427	1.58033	1.67675	1.81874
	CLPTM1L	1	1	1	1.04837	0.740502	0.725537	1.07448	1.17591	0.957529
	NCAPH2	1	1	1	1.54221	1.12092	0.978277	1.65868	1.73424	1.53034
	TEAD3	1	1	1	0.810687	0.816248	0.713425	0.970021	1.45385	1.19337
	ATG9A	1	1	1	1.1788	1.1514	1.80737	1.96692	1.52638	1.01854
	CBX4	1	1	1	0.867782	0.864148	0.627429	1.10568	1.69547	1.40795
	Dunnett's multiple comparisons test	Summary	Adjusted P Value
	LMNB1
	WT vs. KO1	ns	>0.9999
	WT vs. KO2	ns	>0.9999
	CCND3
	WT vs. KO1	ns	0.064
	WT vs. KO2	*	0.0493
	TEAD2
	WT vs. KO1	ns	0.2028
	WT vs. KO2	ns	0.0782
	TRAF7
	WT vs. KO1	ns	0.4578
	WT vs. KO2	****	<0.0001
	MXRA7
	WT vs. KO1	ns	0.3172
	WT vs. KO2	***	0.0007
	SP140L
	WT vs. KO1	ns	0.5678
	WT vs. KO2	ns	0.2026
	CCDC125
	WT vs. KO1	ns	0.2674
	WT vs. KO2	ns	0.1146
	PIGG
	WT vs. KO1	ns	0.7611
	WT vs. KO2	****	<0.0001
	SCRN2
	WT vs. KO1	ns	0.8822
	WT vs. KO2	ns	0.1056
	RPS6KB2
	WT vs. KO1	ns	0.5742
	WT vs. KO2	****	<0.0001
	CLPTM1L
	WT vs. KO1	ns	0.423
	WT vs. KO2	ns	0.8445
	NCAPH2
	WT vs. KO1	ns	0.2379
	WT vs. KO2	****	<0.0001
	TEAD3
	WT vs. KO1	ns	0.2207
	WT vs. KO2	ns	0.2622
	ATG9A
	WT vs. KO1	*	0.0181
	WT vs. KO2	**	0.0013
	CBX4
	WT vs. KO1	ns	0.2387
	WT vs. KO2	*	0.0114

## Sheet: Fig. 3
PANEL A
			WT			eIF2A clone 1			eIF2A clone 2
		LAMB	1	1	1	1	1	1	1	1	1
		uORF weak	0.374181	0.521817	0.723634	1.03562	0.454167	0.865884	0.430825	0.701621	0.553668
		uORF medium	0.734803	0.777893	0.492963	0.457397	1.05337	0.57337	1.01233	0.735233	0.585994
		uORF strong	0.511147	0.672065	0.456768	0.368052	0.6501	0.459977	0.665709	0.603552	0.427212
		uORF top strong	0.255216	0.27496	0.235994	0.432021	0.42715	0.299169	0.368802	0.320365	0.24421
		near-cognate uORF TGGAgtgA	1.07491	1.39873	0.966051	1.03703	1.81617	1.02782	1.00844	1.53568	1.10385
		near-cognate uORF TGGAttgAaa	0.996024	1.26394	1.17662	1.273	1.93167	1.24644	1.14128	1.52671	1.43022
		near-cognate uORF CATACctgTat	0.812948	0.802354	0.865494	0.771099	1.04797	0.846178	0.686419	0.799724	0.912686
		Dunnett's multiple comparisons test	Summary	Adjusted P Value
		LAMB
		WT vs. eIF2A clone 1	ns	>0.9999
		WT vs. eIF2A clone 2	ns	>0.9999
		uORF weak
		WT vs. eIF2A clone 1	ns	0.234
		WT vs. eIF2A clone 2	ns	0.9864
		uORF medium
		WT vs. eIF2A clone 1	ns	0.9811
		WT vs. eIF2A clone 2	ns	0.7252
		uORF strong
		WT vs. eIF2A clone 1	ns	0.9226
		WT vs. eIF2A clone 2	ns	0.9901
		uORF top strong
		WT vs. eIF2A clone 1	ns	0.6359
		WT vs. eIF2A clone 2	ns	0.9176
		near-cognate uORF TGGAgtgA
		WT vs. eIF2A clone 1	ns	0.5677
		WT vs. eIF2A clone 2	ns	0.8758
		near-cognate uORF TGGAttgAaa
		WT vs. eIF2A clone 1	ns	0.0767
		WT vs. eIF2A clone 2	ns	0.3018
		near-cognate uORF CATACctgTat
		WT vs. eIF2A clone 1	ns	0.9009
		WT vs. eIF2A clone 2	ns	0.9794
PANEL D
			WT			eIF2A KO
		no uORF	1.51949	1.31859	0.99734	0.901917	1.12311	1.20324
		medium	7.54229	7.77962	6.69612	8.47382	5.5384	3.54985
		top	27.3779	28.1953	36.0812	22.2117	18.6022	28.6067
		gtg	1.31666	0.901297	1.0014	1.40905	1.29355	0.723866
		ctg	0.648882	1.03824	1.29489	0.693878	0.774059	0.745951
		ttg	0.697051	0.244233	0.35482	0.621272	0.642928	0.708861
			Discovery	p adjusted
		no uORF	No	0.446881
		medium	No	0.446881
		top	No	0.446881
		gtg	No	0.800824
		ctg	No	0.446881
		ttg	No	0.446881

## Sheet: Fig. 4
PANEL A
		WT			WT + TM			KO1			KO1 + TM			KO2			KO2 +TM
	LAMB1	1.10245	0.942466	0.955088	0.763715	0.82729	0.781304	1.055	1.00296	0.942038	0.59551	0.995588	0.789336	0.866591	0.920354	1.21305	0.638003	1.09247	0.978332
	ATF4	1.00049	1.01251	0.986998	5.67972	5.34473	5.1525	0.928313	1.08794	0.983746	7.88731	6.76546	5.59646	0.978647	1.07195	0.949407	8.16555	6.57991	5.38926
	PPP1R15B	1.01888	1.04413	0.936987	1.81517	1.56524	1.92779	0.996315	1.01513	0.988555	2.00804	2.64186	2.42812	0.952545	1.01363	1.03382	3.17323	2.2553	2.6389
	IFRD1	0.964946	1.07977	0.955284	2.7462	2.46211	2.33807	0.954635	1.02498	1.02039	3.01084	3.18705	2.96664	1.07528	0.979952	0.94477	4.44024	4.29024	3.27988
	Dunnett's multiple comparisons test	Summary	Adjusted P Value
	LAMB1
	WT + TM vs. KO1 + TM	ns	>0.9999
	WT + TM vs. KO2 +TM	ns	0.9616
	ATF4
	WT + TM vs. KO1 + TM	*	0.0185
	WT + TM vs. KO2 +TM	*	0.0221
	PPP1R15B
	WT + TM vs. KO1 + TM	ns	0.3832
	WT + TM vs. KO2 +TM	ns	0.1233
	IFRD1
	WT + TM vs. KO1 + TM	ns	0.4425
	WT + TM vs. KO2 +TM	**	0.0099
PANEL C
		WT			WT + TM			KO1			KO1 + TM			KO2			KO2 +TM
	LamB	1	1	1	1	1	1	1	1	1	1	1	1	1	1	1	1	1	1
	SLC7A11	1	1	1	0.708854	0.663998	0.799422	1	1	1	0.654887	1.07248	0.891861	1	1	1	0.998996	0.762346	1.04732
	QTRT2	1	1	1	0.877044	1.0567	1.00764	1	1	1	1.11867	1.70519	1.09378	1	1	1	1.85408	0.976666	1.1886
	CNOT1	1	1	1	1.0073	1.14379	0.80786	1	1	1	1.31528	1.61003	0.910846	1	1	1	2.29011	1.0743	0.843666
	IQGAP1	1	1	1	1.08769	1.20454	0.83579	1	1	1	1.02735	1.63874	0.936386	1	1	1	1.78859	1.54831	0.98522
	ARHGAP11A	1	1	1	1.12877	2.03541	1.19022	1	1	1	1.33603	1.15511	1.06695	1	1	1	1.19916	1.62312	0.868951
	POLR3E	1	1	1	0.446037	0.733152	0.511824	1	1	1	0.666205	0.725584	0.644736	1	1	1	0.920811	0.844696	0.719482
	PNPLA8	1	1	1	0.768432	1.51344	0.786169	1	1	1	1.04003	1.07221	0.919626	1	1	1	1.62058	1.99711	0.823695
	ACTN4	1	1	1	0.66312	1.40304	0.773132	1	1	1	0.859968	1.17832	0.944142	1	1	1	1.43121	1.12608	1.04946
	OSBP2	1	1	1	0.498553	0.866671	0.859783	1	1	1	0.9074	1.34437	0.952096	1	1	1	1.56703	1.49085	0.993744
	SLC38A1	1	1	1	0.629427	0.875979	0.910756	1	1	1	1.01732	1.47804	1.02704	1	1	1	1.37298	1.62014	0.941036
	PTP4A1	1	1	1	0.691487	1.10349	0.83334	1	1	1	0.859953	0.891813	1.04109	1	1	1	1.36058	1.65548	1.13373
	Dunnett's multiple comparisons test	Summary	Adjusted P Value
	LamB
	WT + TM vs. KO1 + TM	ns	>0.9999
	WT + TM vs. KO2 +TM	ns	>0.9999
	SLC7A11
	WT + TM vs. KO1 + TM	ns	0.7703
	WT + TM vs. KO2 +TM	ns	0.5976
	QTRT2
	WT + TM vs. KO1 + TM	ns	0.3185
	WT + TM vs. KO2 +TM	ns	0.2538
	CNOT1
	WT + TM vs. KO1 + TM	ns	0.3907
	WT + TM vs. KO2 +TM	ns	0.167
	IQGAP1
	WT + TM vs. KO1 + TM	ns	0.746
	WT + TM vs. KO2 +TM	ns	0.192
	ARHGAP11A
	WT + TM vs. KO1 + TM	ns	0.4561
	WT + TM vs. KO2 +TM	ns	0.5731
	POLR3E
	WT + TM vs. KO1 + TM	ns	0.854
	WT + TM vs. KO2 +TM	ns	0.458
	PNPLA8
	WT + TM vs. KO1 + TM	ns	0.9982
	WT + TM vs. KO2 +TM	ns	0.1198
	ACTN4
	WT + TM vs. KO1 + TM	ns	0.9729
	WT + TM vs. KO2 +TM	ns	0.4805
	OSBP2
	WT + TM vs. KO1 + TM	ns	0.3167
	WT + TM vs. KO2 +TM	*	0.0296
	SLC38A1
	WT + TM vs. KO1 + TM	ns	0.2376
	WT + TM vs. KO2 +TM	ns	0.0791
	PTP4A1
	WT + TM vs. KO1 + TM	ns	0.9644
	WT + TM vs. KO2 +TM	ns	0.0783

## Sheet: Fig. 1 - fig. suppl. 1
PANEL B		WT	1.1977	0.802297
		KO1	0.326665	0.302609
		KO2	0.165366	0.181959
		Dunnett's multiple comparisons test	Mean Diff.	95.00% CI of diff.	Below threshold?	Summary	Adjusted P Value	A-?
		WT vs. KO1	0.6854	0.05949 to 1.311	Yes	*	0.0395	B	KO1
		WT vs. KO2	0.8263	0.2005 to 1.452	Yes	*	0.0239	C	KO2
PANEL D			DMSO CYTOSOL			TM cytosol				adjusted p value
		eIF2A/tubulin	1	1	1	1.29418	1.04655	0.850406		0.652222
		eIF2A/cMYC	1	1	1	1.03369	1.11587	0.949071		0.652222
PANEL G			DMSO			POLY I:C			LPS			TM
		eIF2A	1	1	1	0.897856	1.0142	1.19894	0.835637	1.02904	0.9737	0.8906	1.0396	1.1507
		Number of families	1
		Number of comparisons per family	3
		Alpha	0.05
		Dunnett's multiple comparisons test	Mean Diff.	95.00% CI of diff.	Below threshold?	Summary	Adjusted P Value	A-?
		DMSO vs. POLY I:C	-0.037	-0.2999 to 0.2259	No	ns	0.9556	B	POLY I:C
		DMSO vs. LPS	0.05387	-0.2090 to 0.3168	No	ns	0.8833	C	LPS
		DMSO vs. TM	-0.02697	-0.2899 to 0.2359	No	ns	0.9815	D	TM
		Test details	Mean 1	Mean 2	Mean Diff.	SE of diff.	n1	n2	q	DF
		DMSO vs. POLY I:C	1	1.037	-0.037	0.09129	3	3	0.4053	8
		DMSO vs. LPS	1	0.9461	0.05387	0.09129	3	3	0.5901	8
		DMSO vs. TM	1	1.027	-0.02697	0.09129	3	3	0.2954	8
PANEL I		E.V.	0.92159	0.935513	1.1429	1.08624		P value	0.9636
		eIF2A	0.812292	1.30802	1.00384	0.939517

## Sheet: Fig. 2. - fig. suppl. 2
PANEL A
		siCONTROL				siEIF2A
	LMNB1	1.06353	1.05008	0.909033	0.977361	0.891135	1.03375	1.13033	0.794022
	CCND3	1.01404	1.05626	1.07703	0.852667	0.97947	0.845923	0.852919	0.870671
	TEAD2	0.954232	0.914352	1.0268	1.10462	1.03487	0.967022	0.909839	0.757574
	TRAF7	1.07785	1.01845	0.956731	0.946968	1.09132	0.98879	0.748038	0.57972
	MXRA7	1.01884	1.09154	0.922201	0.967426	0.940389	0.870883	1.12966	0.991484
	SP140L	0.701886	1.17909	1.06172	1.05731	0.895831	0.740785	0.997676	0.856191
	CCDC125	0.931405	1.06726	1.1743	0.827025	0.822773	0.940738	0.920683	0.972142
	PIGG	1.01979	1.0855	0.92908	0.96563	0.831125	0.991873	1.0745	0.917717
	SCRN2	1.00059	1.06741	0.799776	1.13222	0.847241	0.944079	0.83536	0.785825
	RPS6KB2	0.938018	1.06635	1.09126	0.904371	1.65775	1.19775	1.47609	1.4919
	CLPTM1L	0.932922	1.04917	1.05815	0.959759	0.85319	1.02533	0.963884	0.864516
	NCAPH2	0.765407	0.96031	1.10659	1.16769	0.918536	0.899779	0.910357	0.939354
	TEAD3	0.995552	0.979339	1.04085	0.984258	1.20651	0.846283	1.08348	0.552478
	ATG9A	1.29733	0.989356	0.711532	1.00179	1.03672	0.988032	1.20624	0.904683
	CBX4	0.851038	0.918737	1.18592	1.0443	0.72905	0.830877	0.814915	0.704454
	5' UTR	Discovery	q value
	LMNB1	No	0.774451
	CCND3	No	0.428302
	TEAD2	No	0.570127
	TRAF7	No	0.570127
	MXRA7	No	0.81876
	SP140L	No	0.570127
	CCDC125	No	0.570127
	PIGG	No	0.668071
	SCRN2	No	0.428302
	RPS6KB2	No	0.07706
	CLPTM1L	No	0.570127
	NCAPH2	No	0.592992
	TEAD3	No	0.770605
	ATG9A	No	0.81876
	CBX4	No	0.214468
PANEL D
		WT					KO1					KO2
	LMNB1	1	1	1			1	1	1	1	1	1	1	1	1	1
	SHORT	1	1	1			1.27182	1.2774	0.945219	1.19913	0.805926	1.65167	2.27848	1.18911	0.598433	1.42192
	ECMV	1	1	1			0.874145	1.34261	1.17931	0.75955	0.923604	1.2719	1.29984	1.12218	1.35582	1.54933
	Dunnett's multiple comparisons test	Summary	Adjusted P Value
	LMNB1
	WT vs. KO1	ns	>0.9999
	WT vs. KO2	ns	>0.9999
	SHORT
	WT vs. KO1	ns	0.8055
	WT vs. KO2	ns	0.055
	ECMV
	WT vs. KO1	ns	0.9943
	WT vs. KO2	ns	0.1691

## Sheet: Fig.3 - fig. suppl. 1
PANEL C		all mRNAs	uORFs_AUG	uORFs_near_cognate			Dunnett's multiple comparisons test	Summary	Adjusted P Value
		-0.134515	-1.91834	-1.91834			all mRNAs vs. uORFs_AUG	****	<0.0001
		0.0621756	-1.84154	-1.84154			all mRNAs vs. uORFs_near_cognate	ns	0.8919
		0.0601395	-1.51357	-1.59216
		-0.115487	-1.43079	-1.51357
		-0.112666	-1.25564	-1.43079			PANEL E			WT				KO1						PANEL F
		-0.104582	-1.22035	-1.31259					0	7138	16062	16024	17042	8876	12881	23698	11762					HEK293T
		-0.494829	-1.18082	-1.25564					1	41242	45762	51078	42989	64915	50668	50240	47226				time	WT	KO
		-0.0213858	-1.14656	-1.24802					2	165101	175596	176959	136857	176623	163850	167642	142154				-0.97	6.7e-05	6.9e-05
		-0.333914	-1.13162	-1.22035					3	279329	355994	320100	209971	302642	371464	295829	354181				-0.94	6.6e-05	6.6e-05
		-0.453677	-1.04291	-1.20599					4	1088012	1118350	1007984	934178	760109	787214	916456	750528				-0.91	6.2e-05	6.5e-05
		-0.0759674	-1.00382	-1.20096																	-0.88	5.7e-05	6.1e-05
		-0.0681639	-0.995841	-1.19159					Unpaired t test												-0.85	5.5e-05	6e-05
		-0.508405	-0.969615	-1.18082					P value	0.8786											-0.82	5.5e-05	5.8e-05
		-0.491856	-0.96427	-1.14656																	-0.79	5.5e-05	5.5e-05
		-0.107194	-0.923358	-1.13162																	-0.76	5.2e-05	5.5e-05
		-0.492181	-0.922766	-1.12365			PANEL G														-0.73	5.2e-05	5.5e-05
		-0.118677	-0.887062	-1.09051					WT			KO									-0.7	5.4e-05	5.5e-05
		-0.200724	-0.863032	-1.0902					1	1	1	1.04032	0.894497	0.847364							-0.67	5.3e-05	5.3e-05
		-0.192168	-0.861212	-1.06612																	-0.64	5.4e-05	5.2e-05
		-0.187377	-0.858969	-1.06468																	-0.61	5.2e-05	5.4e-05
		-0.163989	-0.843834	-1.06072					P value	<0.0001											-0.58	5.1e-05	5.2e-05
		-0.206827	-0.842826	-1.04291					P value summary	****											-0.55	5.1e-05	5.1e-05
		-0.191339	-0.840748	-1.04279																	-0.52	4.9e-05	5.1e-05
		-0.195656	-0.839745	-1.0405																	-0.49	4.8e-05	5.2e-05
		0.0291014	-0.83318	-1.00382																	-0.46	4.9e-05	5e-05
		0.030602	-0.822256	-0.995841																	-0.43	4.7e-05	5e-05
		-0.464301	-0.817128	-0.992365																	-0.4	4.5e-05	4.9e-05
		-0.0443431	-0.801437	-0.969615																	-0.37	4.5e-05	4.7e-05
		-0.290755	-0.801339	-0.96427																	-0.34	4.7e-05	4.5e-05
		-0.0479001	-0.792593	-0.939697			PANEL D														-0.31	4.6e-05	4.6e-05
		-0.0477321	-0.788257	-0.933794																	-0.28	4.5e-05	4.8e-05
		-0.0447724	-0.785982	-0.926026				EV						eIF2A							-0.25	4.6e-05	4.7e-05
		-0.044188	-0.77346	-0.923358			LamB	1	1	1	1	1	1	1.25516	1.22477	0.927916	0.789724	1.11381	0.965201		-0.22	4.7e-05	4.7e-05
		-0.451945	-0.772593	-0.922766			uORF (﻿GTTTatgC) weak	0.629024	0.619187	0.609118	0.444004	0.45665	0.547726	0.498578	0.444451	0.538272	0.543089	0.362753	0.398984		-0.19	4.6e-05	4.6e-05
		-0.428901	-0.768021	-0.922581			uORF (GTGGatgG) medium	0.791473	0.87568	0.213318	0.235811	0.454592	0.414685	0.538519	0.477469	0.242192	0.256044	0.271423	0.220248		-0.16	4.5e-05	4.7e-05
		-0.486477	-0.766683	-0.918141			uORF (﻿CATACatgT) strong	0.595146	0.606864	0.86634	0.722334	0.619025	0.388176	0.566406	0.554217	0.471434	0.383255	0.433773	0.408148		-0.13	7.5e-05	4.6e-05
		-0.34444	-0.764559	-0.917873			uORF (﻿TCATCatgC) top strong	0.316519	0.354437	0.209528	0.200427	0.309325	0.165175	0.396223	0.3244	0.22783	0.200999	0.218012	0.178739		-0.1	0.000432	4.6e-05
		-0.187684	-0.764417	-0.899227			near-cognate uORF TGGAgtgA	1.90885	1.72061	1.00138	0.968199	1.36057	0.879834	1.82587	1.8007	0.956037	0.828072	0.934973	0.756547		-0.07	0.001858	0.000128
		-0.32289	-0.764011	-0.895084			near-cognate uORF TGGAttgAaa	2.13079	1.91023	2.071	1.95464	1.29152	1.13245	2.58153	2.17161	1.79726	1.77061	1.08866	0.974529		-0.04	0.003671	0.000554
		-0.0488654	-0.760772	-0.887062			near-cognate uORF CATACctgTat	1.74291	1.49404	0.938128	1.05223	0.984683	1.00926	1.69448	1.44753	0.886614	0.918386	0.727258	0.784498		-0.01	0.007239	0.002045
		-0.0328794	-0.757091	-0.881167																	0.02	0.011036	0.004088
		-0.279738	-0.753943	-0.869791																	0.05	0.015452	0.006639
		-0.0278886	-0.753446	-0.863032					P value	q value											0.08	0.021417	0.010279
		-0.0266027	-0.751042	-0.861212			LamB	No	0.549847	0.882741											0.11	0.027285	0.014186
		-0.22808	-0.741443	-0.858969			uORF (﻿GTTTatgC) weak	No	0.086586	0.349808											0.14	0.033847	0.019846
		-0.503295	-0.741225	-0.856236			uORF (GTGGatgG) medium	No	0.226325	0.609569											0.17	0.041049	0.024706
		-0.169752	-0.737686	-0.855755			uORF (﻿CATACatgT) strong	No	0.045536	0.349808											0.2	0.0488	0.031541
		-0.166827	-0.737027	-0.851123			uORF (﻿TCATCatgC) top strong	No	0.974382	0.984126											0.23	0.058481	0.04099
		-0.328764	-0.731702	-0.84473			near-cognate uORF TGGAgtgA	No	0.655501	0.882741											0.26	0.067232	0.050268
		-0.182123	-0.727755	-0.843834			near-cognate uORF TGGAttgAaa	No	0.95497	0.984126											0.29	0.077833	0.062087
		-0.161609	-0.727362	-0.842826			near-cognate uORF CATACctgTat	No	0.561333	0.882741											0.32	0.087146	0.072726
		-0.300968	-0.719026	-0.842503																	0.35	0.096628	0.083626
		-0.388136	-0.717012	-0.841036																	0.38	0.106193	0.094632
		-0.380677	-0.712083	-0.840748																	0.41	0.115635	0.105642
		-0.415265	-0.71117	-0.839838																	0.44	0.126293	0.118156
		-0.333154	-0.709943	-0.839745																	0.47	0.134989	0.128393
		-0.406998	-0.708031	-0.835591																	0.5	0.144504	0.139727
		-0.35625	-0.707645	-0.83318																	0.53	0.150859	0.147467
		-0.261728	-0.707448	-0.830535																	0.56	0.158024	0.156403
		-0.358476	-0.707276	-0.829244																	0.59	0.165693	0.16633
		-0.217102	-0.707221	-0.828246																	0.62	0.171596	0.174241
		-0.315311	-0.702962	-0.827277																	0.65	0.177614	0.182539
		-0.248232	-0.701772	-0.827115																	0.68	0.18202	0.188665
		-0.243901	-0.699846	-0.825193																	0.71	0.185229	0.19376
		-0.359301	-0.698823	-0.822256																	0.74	0.189085	0.197665
		-0.0584932	-0.698241	-0.817128																	0.77	0.191864	0.20037
		-0.0696126	-0.687885	-0.814422																	0.8	0.194638	0.20227
		-0.321596	-0.684099	-0.814286																	0.83	0.196689	0.20317
		-0.0938744	-0.68164	-0.801437																	0.86	0.198465	0.203691
		-0.303439	-0.676466	-0.801339																	0.89	0.200174	0.204001
		-0.329872	-0.674862	-0.79936																	0.92	0.2012	0.204118
		-0.0856026	-0.673993	-0.792593																	0.95	0.202356	0.204213
		-0.167852	-0.672947	-0.788257																	0.95	0.202493	0.204223
		-0.100829	-0.672906	-0.785982																	0.98	0.203085	0.204267
		-0.100427	-0.672023	-0.785072																	1.01	0.203638	0.204306
		-0.180409	-0.667897	-0.778801																	1.04	0.203906	0.204326
		-0.229843	-0.662335	-0.773525																	1.07	0.204082	0.204344
		-0.452428	-0.656772	-0.77346																	1.1	0.204204	0.204353
		-0.216086	-0.650642	-0.770537																	1.13	0.204275	0.204351
		-0.515366	-0.650177	-0.769652																	1.16	0.204324	0.204374
		-0.511125	-0.649687	-0.768021																	1.19	0.204337	0.204388
		-0.237698	-0.649186	-0.766683																	1.22	0.204352	0.204385
		-0.484126	-0.648833	-0.766394																	1.25	0.204379	0.204384
		-0.517201	-0.644583	-0.764559																	1.28	0.204386	0.204391
		-0.319202	-0.639914	-0.764417																	1.31	0.204389	0.204391
		-0.146679	-0.637976	-0.764011																	1.34	0.204393	0.20442
		-0.144443	-0.634962	-0.760772																	1.37	0.20439	0.204417
		-0.258065	-0.634455	-0.757091																	1.4	0.204391	0.204402
		-0.250808	-0.632073	-0.753943																	1.43	0.204397	0.204398
		-0.241399	-0.630329	-0.753446																	1.46	0.204412	0.20441
		-0.358149	-0.630006	-0.752371																	1.49	0.204416	0.20442
		-0.347687	-0.629994	-0.751042																	1.52	0.204406	0.204424
		-0.341575	-0.629607	-0.749828																	1.55	0.20441	0.204434
		-0.339357	-0.620917	-0.741443																	1.58	0.20443	0.204425
		-0.114432	-0.619776	-0.741225																	1.61	0.20442	0.204434
		-0.31333	-0.618569	-0.737883																	1.64	0.204425	0.204439
		-0.309301	-0.617912	-0.737686																	1.67	0.204431	0.204425
		-0.304563	-0.616911	-0.737027																	1.7	0.204426	0.204445
		-0.170853	-0.616076	-0.734747																	1.73	0.204429	0.204432
		-0.166404	-0.616015	-0.733375																	1.76	0.204435	0.204442
		-0.161889	-0.615706	-0.731702																	1.79	0.204425	0.204442
		-0.17286	-0.608277	-0.729464																	1.82	0.204425	0.204441
		-0.23914	-0.603847	-0.727755																	1.85	0.204426	0.204446
		-0.651985	-0.602979	-0.727362																	1.88	0.204439	0.204441
		-0.677398	-0.602555	-0.726371																	1.91	0.20445	0.204431
		-0.404075	-0.601855	-0.726314																	1.94	0.204438	0.204442
		-0.17329	-0.601815	-0.724605																	1.97	0.204434	0.204442
		-0.169522	-0.599624	-0.719026																	2	0.204427	0.204436
		-0.299368	-0.597835	-0.717169																	2.03	0.204442	0.204437
		-0.289952	-0.59654	-0.717012																	2.06	0.204459	0.204427
		-0.349783	-0.595465	-0.712083																	2.09	0.204455	0.204435
		-0.667986	-0.594769	-0.71117																	2.12	0.204443	0.204465
		-0.654626	-0.594303	-0.711056																	2.15	0.204434	0.204462
		-0.319092	-0.593679	-0.708031																	2.18	0.204451	0.204442
		-0.311253	-0.59198	-0.707645																	2.21	0.204453	0.204441
		-0.313362	-0.591585	-0.707448																	2.24	0.204452	0.204455
		-0.273028	-0.590655	-0.707276																	2.27	0.204457	0.20447
		0.312778	-0.589788	-0.707221																	2.3	0.204442	0.204461
		-0.168833	-0.588338	-0.702962																	2.33	0.204451	0.20445
		0.102879	-0.58698	-0.702182																	2.36	0.204453	0.204446
		-0.248229	-0.5862	-0.701772																	2.39	0.204442	0.20446
		-0.168942	-0.58578	-0.700563																	2.42	0.204451	0.204463
		-0.243533	-0.584871	-0.700187																	2.45	0.204459	0.204456
		0.106521	-0.584708	-0.699846																	2.48	0.204455	0.204449
		0.108706	-0.584656	-0.698823																	2.51	0.204473	0.204443
		0.109798	-0.584135	-0.698241																	2.54	0.204463	0.204454
		-0.425477	-0.583773	-0.697024																	2.57	0.204458	0.204476
		-0.0865004	-0.581679	-0.692701																	2.6	0.204461	0.204466
		-0.0831334	-0.577758	-0.687885																	2.63	0.204463	0.204465
		-0.175844	-0.576037	-0.686139																	2.66	0.204456	0.204473
		-0.169846	-0.575095	-0.684099																	2.69	0.204463	0.204471
		-0.704463	-0.573741	-0.682731																	2.72	0.204453	0.204484
		-0.0143434	-0.573429	-0.681136																	2.75	0.204464	0.204472
		-0.0105454	-0.572645	-0.676466																	2.78	0.204482	0.204468
		-0.0167124	-0.571856	-0.674862																	2.81	0.20447	0.204462
		-0.0135325	-0.570692	-0.673993																	2.84	0.204463	0.204455
		-0.170633	-0.569437	-0.672947																	2.87	0.204457	0.204476
		-0.544187	-0.569074	-0.672906																	2.9	0.204452	0.204469
		-0.540758	-0.568563	-0.672023																	2.93	0.204459	0.204475
		-0.0367328	-0.565872	-0.667986																	2.96	0.204458	0.20447
		-0.0313643	-0.565507	-0.6666																	2.99	0.204454	0.204466
		-0.324462	-0.565327	-0.665014																	3.02	0.204456	0.204472
		-0.456732	-0.56409	-0.663125																	3.05	0.20445	0.204483
		-0.36832	-0.561655	-0.662335																	3.08	0.204454	0.204482
		0.0956187	-0.56037	-0.661902																	3.11	0.204471	0.204466
		-0.172693	-0.556787	-0.661788																	3.14	0.204488	0.204465
		-0.171258	-0.553169	-0.656772																	3.17	0.204473	0.204472
		-0.165989	-0.544553	-0.65578																	3.2	0.204449	0.204473
		-0.229566	-0.544183	-0.654626																	3.23	0.204456	0.204465
		-0.222786	-0.543777	-0.653806																	3.26	0.204458	0.204466
		-0.293569	-0.543771	-0.652207																	3.29	0.204475	0.204471
		-0.280686	-0.54344	-0.651475																	3.32	0.204468	0.204468
		-0.30365	-0.543333	-0.651239																	3.35	0.204461	0.204467
		-0.278326	-0.543229	-0.650642																	3.38	0.204471	0.204474
		-0.158115	-0.542384	-0.65025																	3.41	0.204481	0.204464
		-0.441688	-0.542229	-0.650177																	3.44	0.204482	0.204468
		-0.435258	-0.541599	-0.649687																	3.47	0.204476	0.204464
		-0.43601	-0.540896	-0.649186																	3.5	0.204459	0.204477
		-0.368295	-0.539814	-0.648961																	3.53	0.204472	0.204475
		-0.38896	-0.539775	-0.648833																	3.56	0.204469	0.204456
		-0.145912	-0.538942	-0.646513																	3.59	0.204465	0.204473
		-0.286324	-0.538696	-0.644975																	3.62	0.204479	0.20447
		-0.169229	-0.53858	-0.644583																	3.65	0.204477	0.204472
		-0.143209	-0.538562	-0.640115																	3.68	0.204478	0.20447
		-0.0576326	-0.538179	-0.639914																	3.71	0.204483	0.204475
		-0.268562	-0.538067	-0.639003																	3.74	0.204471	0.204472
		-0.331565	-0.537637	-0.637978																	3.77	0.20447	0.204469
		-0.237128	-0.537323	-0.637976																	3.8	0.204478	0.204485
		-0.212138	-0.536655	-0.637257																	3.83	0.204465	0.204475
		0.165705	-0.535692	-0.636657																	3.86	0.204478	0.204469
		0.170199	-0.535436	-0.634962																	3.89	0.20448	0.204462
		0.170747	-0.535423	-0.634455																	3.92	0.20447	0.204462
		0.174033	-0.53294	-0.6335																	3.95	0.204461	0.204473
		0.14867	-0.531973	-0.632073																	3.98	0.204466	0.204493
		0.185438	-0.531751	-0.630329																	4.01	0.204476	0.204486
		-0.196514	-0.531697	-0.630006																	4.04	0.204481	0.204477
		-0.649186	-0.531457	-0.629994																	4.07	0.20447	0.204477
		-0.494519	-0.529077	-0.629607																	4.1	0.204468	0.204492
		-0.377632	-0.528566	-0.62789																	4.13	0.204469	0.204484
		-0.353735	-0.528448	-0.626238																	4.16	0.204468	0.204478
		-0.233115	-0.52732	-0.624916																	4.19	0.20448	0.204477
		-0.222663	-0.526661	-0.622672																	4.22	0.204489	0.204477
		-0.467431	-0.524532	-0.620917																	4.25	0.204478	0.204478
		-0.404228	-0.52368	-0.62041																	4.28	0.204476	0.204481
		-0.381129	-0.522612	-0.619776																	4.31	0.204486	0.204467
		-0.138379	-0.519386	-0.619669																	4.34	0.204479	0.204466
		-0.197594	-0.518977	-0.618569																	4.37	0.204474	0.204478
		-0.207879	-0.518098	-0.617912																	4.4	0.204468	0.204487
		0.0879568	-0.517201	-0.616911																	4.43	0.204478	0.204491
		-0.222644	-0.514957	-0.616076																	4.46	0.204478	0.204483
		-0.571706	-0.514908	-0.616015																	4.49	0.204484	0.204477
		-1.09051	-0.514688	-0.615706																	4.52	0.204489	0.204481
		-1.06612	-0.512702	-0.612328																	4.55	0.204486	0.204475
		-0.451111	-0.511605	-0.609061																	4.58	0.20447	0.204484
		-0.0175874	-0.508859	-0.608277																	4.61	0.204456	0.204484
		-0.127658	-0.508652	-0.607272																	4.64	0.204477	0.204476
		0.186267	-0.505347	-0.607141																	4.67	0.204479	0.204471
		-0.0777579	-0.505061	-0.603847																	4.7	0.204475	0.204469
		-0.129336	-0.503779	-0.603544																	4.73	0.204476	0.204485
		-0.114932	-0.50315	-0.603194																	4.76	0.204464	0.204504
		0.195678	-0.503096	-0.602995																	4.79	0.204485	0.20448
		-0.221647	-0.502311	-0.602979																	4.82	0.204488	0.204481
		0.258731	-0.500918	-0.602555																	4.85	0.204479	0.204471
		-0.14338	-0.500888	-0.601855																	4.88	0.204482	0.20448
		-0.319534	-0.499955	-0.601815																	4.91	0.204477	0.204482
		-0.305557	-0.498846	-0.601626																	4.94	0.204478	0.204469
		-0.274185	-0.496617	-0.600665																	4.97	0.204481	0.204459
		-0.31807	-0.496267	-0.600648																	5	0.204471	0.204475
		-0.218792	-0.495136	-0.599624																	5.03	0.204472	0.204481
		-0.214388	-0.494829	-0.598014																	5.06	0.204471	0.20448
		-0.206692	-0.494483	-0.597835																	5.09	0.204481	0.20448
		-0.334373	-0.494024	-0.597229																	5.12	0.204489	0.204483
		-0.323817	-0.493821	-0.59654																	5.15	0.204479	0.204478
		-0.214532	-0.493686	-0.595638																	5.18	0.204471	0.204482
		0.301119	-0.492778	-0.595465																	5.21	0.204471	0.204479
		-0.335066	-0.492294	-0.595244																	5.24	0.204472	0.20447
		-0.191939	-0.491856	-0.594769																	5.27	0.20449	0.204468
		-0.178856	-0.49143	-0.594303																	5.3	0.204476	0.204462
		-0.43089	-0.491171	-0.593679																	5.33	0.204476	0.20447
		-0.427992	-0.488092	-0.59315																	5.36	0.204471	0.20448
		-0.491171	-0.487559	-0.593025																	5.39	0.204497	0.204482
		0.0877267	-0.487169	-0.592675																	5.42	0.204493	0.204488
		-0.136999	-0.486511	-0.592604																	5.45	0.204492	0.204479
		-0.210005	-0.486469	-0.59198																	5.48	0.204479	0.204483
		-0.374206	-0.486105	-0.591756																	5.51	0.204478	0.204494
		0.0908442	-0.485728	-0.591585																	5.54	0.204466	0.204493
		-0.6666	-0.485203	-0.590655																	5.57	0.204483	0.204491
		-0.222422	-0.484724	-0.590091																	5.6	0.204484	0.204478
		-0.656772	-0.483783	-0.589788																	5.63	0.204481	0.204469
		-1.02457	-0.483607	-0.588338																	5.66	0.204473	0.204493
		-0.165025	-0.482834	-0.5882																	5.69	0.204473	0.204507
		-0.193242	-0.482592	-0.588109																	5.72	0.204484	0.204483
		-0.282304	-0.48136	-0.58804																	5.75	0.204493	0.20448
		-0.1922	-0.480639	-0.58698																	5.78	0.204472	0.204486
		-0.186566	-0.480199	-0.5862																	5.81	0.204464	0.204491
		-0.325526	-0.479785	-0.58595																	5.84	0.204479	0.20448
		-0.525944	-0.479373	-0.58578																	5.87	0.204492	0.204481
		-0.59198	-0.477846	-0.585664																	5.9	0.204492	0.20448
		-0.481573	-0.477781	-0.585283																	5.93	0.204488	0.204474
		-0.479947	-0.476411	-0.584871																	5.96	0.204488	0.204484
		-0.381925	-0.475973	-0.584708																	5.99	0.20448	0.204478
		-0.601626	-0.475619	-0.584656																	6.02	0.20448	0.204481
		-0.426127	-0.47552	-0.584604																	6.05	0.204489	0.204486
		-0.595465	-0.474161	-0.584485																	6.08	0.204488	0.204488
		-0.169145	-0.473784	-0.584135																	6.11	0.204483	0.20449
		-0.168114	-0.473194	-0.583773																	6.14	0.204479	0.204477
		-0.258602	-0.473161	-0.5836																	6.17	0.204488	0.204468
		-0.347316	-0.472022	-0.583581																	6.2	0.204488	0.204473
		-0.0014672	-0.472017	-0.583097																	6.23	0.20448	0.204471
		-0.348006	-0.470925	-0.581679																	6.26	0.204471	0.20447
		-0.439258	-0.47	-0.579861																	6.29	0.204482	0.204478
		-0.0901361	-0.46844	-0.579846																	6.32	0.204483	0.204471
		-0.180203	-0.46829	-0.578564																	6.35	0.204477	0.204465
		-0.186177	-0.468144	-0.577758																	6.38	0.204481	0.204471
		0.140855	-0.467878	-0.576892																	6.41	0.204479	0.204501
		-0.0080197	-0.467862	-0.576272																	6.44	0.204478	0.204486
		0.141291	-0.4658	-0.576037																	6.47	0.204489	0.204479
		0.0811823	-0.465038	-0.57553																	6.5	0.204491	0.204469
		0.28807	-0.464991	-0.575128																	6.53	0.204491	0.204484
		-0.314273	-0.464474	-0.575095																	6.56	0.20448	0.204493
		-0.603194	-0.464256	-0.575083																	6.59	0.204465	0.204491
		-0.16541	-0.463884	-0.574837																	6.62	0.204475	0.20449
		-0.584135	-0.463317	-0.574788																	6.65	0.204476	0.204479
		-0.355023	-0.463165	-0.574774																	6.68	0.204478	0.204478
		-0.170091	-0.462245	-0.57381																	6.71	0.204473	0.204491
		-0.209197	-0.462104	-0.573741																	6.74	0.204479	0.204495
		-0.514865	-0.460614	-0.573613																	6.77	0.204494	0.204492
		-0.214452	-0.46023	-0.573429																	6.8	0.204481	0.20448
		-0.0745571	-0.459225	-0.57307																	6.83	0.204486	0.204486
		0.110722	-0.458568	-0.572748																	6.86	0.20447	0.204496
		0.0198457	-0.457669	-0.572645																	6.89	0.204475	0.204504
		-0.887062	-0.457312	-0.572501																	6.9	0.204478	0.204502
		-0.070281	-0.455839	-0.571898																	6.92	0.204487	0.204495
		-0.305098	-0.455499	-0.571856																	6.95	0.204494	0.20448
		-0.0897089	-0.455209	-0.571706																	6.98	0.20449	0.204485
		-0.0851374	-0.455111	-0.57124																	7.01	0.204482	0.20448
		-0.311726	-0.454878	-0.570692																	7.04	0.204476	0.204493
		-0.467908	-0.454694	-0.570328																	7.07	0.204485	0.204499
		-0.069265	-0.454665	-0.569437																	7.1	0.204491	0.204488
		-0.33053	-0.454542	-0.569074																	7.13	0.204494	0.204478
		-0.202243	-0.452512	-0.568564																	7.16	0.204471	0.204505
		-0.231316	-0.451945	-0.568563																	7.19	0.204474	0.204508
		-0.228677	-0.451111	-0.56822																	7.22	0.204463	0.204496
		-0.202862	-0.450583	-0.567841																	7.25	0.204461	0.204484
		-0.164519	-0.450248	-0.567477																	7.28	0.204488	0.20448
		-0.0813113	-0.448587	-0.567297																	7.31	0.204485	0.20449
		-0.304852	-0.448276	-0.565872																	7.35	0.204471	0.204484
		-0.113254	-0.447985	-0.565831																	7.37	0.204469	0.204489
		-0.333399	-0.447748	-0.565507																	7.4	0.204489	0.20448
		-0.17411	-0.447719	-0.565472																	7.43	0.204487	0.204476
		-0.251268	-0.447	-0.565327																	7.46	0.204494	0.204496
		-0.0674291	-0.446211	-0.564566																	7.49	0.204475	0.204495
		-0.588109	-0.445928	-0.56409																	7.52	0.204478	0.204498
		-0.466673	-0.44583	-0.563831																	7.55	0.204483	0.204483
		-0.460614	-0.44561	-0.562871																	7.58	0.204484	0.204479
		-0.457747	-0.445221	-0.562038																	7.61	0.204479	0.204481
		-0.449305	-0.444522	-0.56195																	7.64	0.204492	0.204477
		-0.443913	-0.443542	-0.561655																	7.67	0.204475	0.20449
		-0.224552	-0.44147	-0.560543																	7.7	0.204474	0.204487
		-0.236898	-0.440357	-0.560464																	7.73	0.204473	0.204477
		-0.317314	-0.439258	-0.56037																	7.76	0.204479	0.204473
		-0.210935	-0.439042	-0.559572																	7.79	0.204465	0.20449
		-0.07429	-0.438229	-0.558184																	7.82	0.204465	0.204485
		-0.102323	-0.437256	-0.557842																	7.85	0.204478	0.204492
		-0.308381	-0.437162	-0.556787																	7.88	0.204486	0.204486
		-0.344418	-0.436074	-0.556391																	7.91	0.204494	0.204475
		-0.301683	-0.43601	-0.556011																	7.94	0.204486	0.204484
		0.208297	-0.435872	-0.553169																	7.97	0.204475	0.204498
		-0.232902	-0.435609	-0.55032																	8	0.204484	0.20451
		-0.2283	-0.435258	-0.550199																	8.03	0.204486	0.204484
		-0.227906	-0.435193	-0.549308																	8.06	0.20448	0.204479
		-0.377462	-0.434875	-0.548787																	8.09	0.204479	0.204495
		-0.13199	-0.434575	-0.547195																	8.12	0.204476	0.2045
		-0.597229	-0.434066	-0.546459																	8.15	0.20449	0.204484
		-0.369436	-0.433748	-0.545461																	8.18	0.204505	0.204471
		-0.367642	-0.432266	-0.544669																	8.21	0.204487	0.20449
		0.390722	-0.43222	-0.544553																	8.24	0.204484	0.204512
		-0.0823006	-0.431968	-0.544187																	8.27	0.204495	0.204504
		0.213146	-0.431943	-0.544183																	8.3	0.204485	0.204496
		-0.348132	-0.431386	-0.543777																	8.33	0.204493	0.204478
		-0.245869	-0.429847	-0.543771																	8.36	0.204483	0.204475
		-0.410921	-0.429308	-0.54366																	8.39	0.204465	0.204488
		-0.538942	-0.429254	-0.543544																	8.42	0.204471	0.204501
		0.453029	-0.428901	-0.54344																	8.45	0.204476	0.204504
		-0.0161601	-0.428619	-0.543333																	8.48	0.204485	0.204498
		-0.0024138	-0.428118	-0.543229																	8.51	0.204487	0.204478
		-0.0020127	-0.427554	-0.542389																	8.54	0.204486	0.204491
		-0.167335	-0.426827	-0.542384																	8.57	0.20449	0.204498
		-0.603544	-0.426036	-0.542348																	8.6	0.204484	0.204487
		-0.0979333	-0.425918	-0.542229																	8.63	0.204483	0.204481
		-0.485203	-0.425556	-0.541599																	8.66	0.204491	0.204495
		-0.237128	-0.425477	-0.541122																	8.69	0.20449	0.20449
		-0.496267	-0.425474	-0.540896																	8.72	0.204489	0.204493
		-0.47077	-0.425056	-0.540758																	8.75	0.20449	0.20449
		0.0757856	-0.424518	-0.539814																	8.78	0.204487	0.204492
		-0.584485	-0.423996	-0.539775																	8.81	0.204478	0.204495
		0.156265	-0.423274	-0.539397																	8.84	0.204478	0.204491
		0.155913	-0.422822	-0.538942																	8.87	0.204483	0.204481
		0.133509	-0.422742	-0.538696																	8.9	0.204484	0.204468
		-0.375667	-0.422731	-0.538598																	8.93	0.204497	0.204465
		-0.926026	-0.422342	-0.53858																	8.96	0.204489	0.204496
		-0.24374	-0.421909	-0.538562																	8.99	0.204499	0.20449
		-0.933794	-0.421747	-0.538067																	9.02	0.204492	0.204493
		-0.145056	-0.421717	-0.537841																	9.05	0.204486	0.204495
		-0.349118	-0.421615	-0.537637																	9.08	0.204485	0.204497
		-0.41892	-0.420997	-0.537323																	9.11	0.204503	0.204501
		-0.0797501	-0.420615	-0.537273																	9.14	0.204491	0.204488
		-0.411935	-0.418847	-0.536974																	9.17	0.204492	0.204487
		-0.274494	-0.418591	-0.536655																	9.2	0.204481	0.204488
		-0.403078	-0.418261	-0.535713																	9.23	0.204492	0.204502
		-0.387586	-0.417884	-0.535692																	9.26	0.204509	0.204499
		-0.135572	-0.417781	-0.535436																	9.29	0.204505	0.204494
		-0.138722	-0.417643	-0.535423																	9.32	0.204478	0.204497
		0.210011	-0.417375	-0.53294																	9.35	0.204471	0.204498
		-0.073718	-0.417339	-0.532238																	9.38	0.204476	0.204493
		-0.0861695	-0.416885	-0.531973																	9.41	0.204491	0.204495
		-0.0767039	-0.416625	-0.531751																	9.44	0.204496	0.20449
		-0.067632	-0.416561	-0.531697																	9.47	0.204482	0.204506
		-0.538067	-0.416161	-0.531457																	9.5	0.204474	0.204501
		0.18016	-0.416132	-0.531039																	9.53	0.204491	0.204488
		-0.302838	-0.416043	-0.529567																	9.56	0.204486	0.204488
		-0.0704129	-0.415317	-0.529285																	9.59	0.204494	0.204492
		-0.302084	-0.415158	-0.529077																	9.62	0.204479	0.204495
		-0.315319	-0.414535	-0.528904																	9.65	0.204427	0.204499
		-0.593679	-0.414247	-0.528566																	9.68	0.204339	0.204504
		-0.283185	-0.414	-0.528448																	9.71	0.20415	0.204473
		-0.84473	-0.413106	-0.527698																	9.74	0.203919	0.204483
		0.43896	-0.413059	-0.52732																	9.77	0.203665	0.204498
		-0.593025	-0.413037	-0.527053																	9.8	0.203177	0.204502
		-0.22957	-0.41294	-0.526661																	9.83	0.202662	0.204498
		0.0863087	-0.412843	-0.526206																	9.86	0.201973	0.204491
		-0.358341	-0.412791	-0.525944																	9.89	0.20129	0.204483
		-0.0420746	-0.412703	-0.525138																	9.92	0.200513	0.204489
		-0.279936	-0.412392	-0.524577																	9.95	0.199686	0.204494
		-0.230918	-0.411935	-0.524532																	9.98	0.198785	0.20451
		-0.217826	-0.411887	-0.523876																	10.01	0.197632	0.2045
		-0.373131	-0.411864	-0.52368																	10.04	0.196564	0.204485
		-0.0481005	-0.411717	-0.523001																	10.07	0.195416	0.204485
		-0.228196	-0.411635	-0.522714																	10.1	0.193945	0.204497
		-0.0070768	-0.411515	-0.522612																	10.13	0.192834	0.204501
		-0.0616731	-0.411164	-0.52035																	10.16	0.191194	0.204501
		-0.0065264	-0.410889	-0.520321																	10.19	0.189746	0.204494
		-0.0062908	-0.41057	-0.520269																	10.22	0.188264	0.204499
		0.00117391	-0.410186	-0.519494																	10.25	0.186511	0.204491
		0.419331	-0.409596	-0.519386																	10.28	0.184998	0.204493
		0.207955	-0.40932	-0.518977																	10.31	0.18324	0.204494
		0.213304	-0.409109	-0.518973																	10.34	0.181986	0.204496
		-0.362518	-0.408351	-0.518735																	10.37	0.180229	0.204491
		-0.138189	-0.408174	-0.518675																	10.4	0.17869	0.204494
		-0.135177	-0.40776	-0.518098																	10.43	0.177157	0.204502
		-0.0561251	-0.407701	-0.517201																	10.46	0.175359	0.204496
		-0.543544	-0.407689	-0.515366																	10.49	0.173832	0.204488
		-0.221488	-0.407543	-0.514961																	10.52	0.172271	0.204483
		0.10702	-0.407408	-0.514957																	10.55	0.170722	0.20449
		-0.298543	-0.407184	-0.514908																	10.58	0.169164	0.204506
		-0.411277	-0.407158	-0.514865																	10.61	0.167344	0.20451
		-0.224447	-0.406854	-0.514688																	10.64	0.165737	0.204489
		0.147673	-0.406739	-0.513348																	10.67	0.163865	0.204501
		-0.194485	-0.40635	-0.512922																	10.7	0.162494	0.204501
		0.0460393	-0.405439	-0.512702																	10.73	0.160835	0.204498
		0.104595	-0.405158	-0.512013																	10.76	0.158928	0.204498
		-0.280923	-0.404626	-0.511605																	10.79	0.157277	0.204496
		-0.0602061	-0.404228	-0.511512																	10.82	0.155354	0.204476
		-0.459552	-0.404075	-0.511455																	10.85	0.153733	0.204492
		0.2059	-0.404003	-0.511248																	10.88	0.151859	0.2045
		-0.463884	-0.403896	-0.511125																	10.91	0.150535	0.204507
		0.0113218	-0.403078	-0.510507																	10.94	0.148978	0.204506
		0.0556266	-0.40234	-0.510414																	10.97	0.14718	0.204491
		-0.0578101	-0.40223	-0.510223																	11	0.145618	0.204493
		-0.28709	-0.400893	-0.509584																	11.03	0.143805	0.204491
		-0.114917	-0.400398	-0.509391																	11.06	0.142242	0.204504
		-0.113002	-0.400381	-0.509215																	11.09	0.140956	0.204506
		-0.265324	-0.399336	-0.508859																	11.12	0.139196	0.204483
		-0.254666	-0.399205	-0.508652																	11.15	0.137712	0.204484
		-0.42899	-0.398964	-0.508405																	11.18	0.135998	0.204494
		0.688223	-0.398228	-0.506902																	11.21	0.134535	0.204485
		0.267492	-0.398209	-0.505841																	11.24	0.133093	0.204502
		0.274044	-0.398152	-0.505347																	11.27	0.131647	0.204487
		-0.248096	-0.398018	-0.505085																	11.3	0.130201	0.204483
		0.170913	-0.397697	-0.505061																	11.33	0.128499	0.204505
		-0.485245	-0.39699	-0.504141																	11.36	0.127034	0.204501
		0.124955	-0.396739	-0.503779																	11.39	0.125588	0.204491
		-0.0152059	-0.396528	-0.503295																	11.42	0.123906	0.204476
		-0.0090419	-0.396264	-0.50315																	11.45	0.122681	0.204477
		-0.228233	-0.395721	-0.503096																	11.48	0.121	0.204494
		-0.21272	-0.395717	-0.502381																	11.51	0.119558	0.204504
		0.496081	-0.395627	-0.502311																	11.54	0.117861	0.204486
		0.687567	-0.393901	-0.501949																	11.57	0.116422	0.204485
		0.186416	-0.393624	-0.501611																	11.6	0.114992	0.2045
		-0.312853	-0.393454	-0.50145																	11.63	0.113341	0.204493
		-0.407543	-0.393173	-0.50105																	11.66	0.112162	0.204491
		-0.0137995	-0.393066	-0.500918																	11.69	0.11052	0.204482
		-0.35559	-0.392522	-0.500888																	11.72	0.109095	0.204486
		-0.354583	-0.392471	-0.500287																	11.75	0.107688	0.204484
		-0.336847	-0.391954	-0.500192																	11.78	0.106079	0.204514
		-0.400398	-0.390961	-0.499955																	11.81	0.104733	0.204512
		-0.35043	-0.390474	-0.498846																	11.84	0.103436	0.204499
		0.490685	-0.389891	-0.498305																	11.87	0.102172	0.204499
		-0.0931617	-0.389837	-0.4982																	11.9	0.10092	0.204495
		-0.0914188	-0.389506	-0.498086																	11.93	0.099469	0.204488
		0.174774	-0.388879	-0.497882																	11.96	0.098229	0.204497
		-0.414959	-0.38866	-0.497831																	11.99	0.096817	0.204495
		-0.0511545	-0.387762	-0.497334																	12.02	0.095822	0.204492
		0.0373761	-0.387676	-0.496617																	12.05	0.094644	0.204495
		-0.24614	-0.387425	-0.496316																	12.08	0.093289	0.204488
		-0.210257	-0.386261	-0.496267																	12.11	0.092125	0.204484
		0.710127	-0.385894	-0.496164																	12.14	0.090779	0.204424
		-0.454665	-0.384797	-0.495261																	12.17	0.08966	0.204294
		-0.312911	-0.384758	-0.4952																	12.2	0.088376	0.203988
		-0.264389	-0.38417	-0.495136																	12.23	0.08748	0.203664
		0.100017	-0.38395	-0.494829																	12.26	0.086415	0.203162
		-0.275555	-0.383904	-0.494519																	12.29	0.08518	0.202352
		-0.0225011	-0.38362	-0.494483																	12.32	0.084116	0.201474
		-0.37636	-0.383462	-0.494024																	12.35	0.082873	0.200265
		0.0411288	-0.382073	-0.49388																	12.38	0.081841	0.199087
		-0.232966	-0.381886	-0.493821																	12.41	0.080984	0.198007
		-0.40776	-0.381659	-0.493686																	12.44	0.079794	0.196379
		-0.179374	-0.380726	-0.493651																	12.47	0.078809	0.19483
		-0.245386	-0.380677	-0.493377																	12.5	0.077647	0.192899
		-0.426102	-0.380208	-0.492778																	12.53	0.076617	0.191139
		-0.147032	-0.379819	-0.492488																	12.56	0.075605	0.189254
		0.333837	-0.379746	-0.49239																	12.59	0.074612	0.187259
		-0.729464	-0.379583	-0.492353																	12.62	0.073616	0.185167
		0.270074	-0.379328	-0.492294																	12.65	0.072489	0.18261
		0.275908	-0.378859	-0.492181																	12.68	0.071505	0.18035
		0.242026	-0.378837	-0.492015																	12.71	0.070378	0.1777
		-0.113589	-0.378058	-0.491856																	12.74	0.069433	0.175405
		0.0162472	-0.377857	-0.491701																	12.77	0.068664	0.173115
		-0.14708	-0.376496	-0.49143																	12.8	0.067634	0.170819
		-0.412828	-0.375991	-0.491171																	12.83	0.066758	0.168543
		-0.139488	-0.375477	-0.490779																	12.83	0.066617	0.168174
		0.286137	-0.374761	-0.490075																	12.86	0.065758	0.16597
		-0.0188171	-0.374531	-0.490009																	12.89	0.064908	0.163766
		0.259582	-0.373258	-0.489766																	12.92	0.064072	0.161548
		-0.152862	-0.373131	-0.489581																	12.95	0.063126	0.158995
		-0.0632403	-0.372441	-0.489547																	12.98	0.062458	0.157184
		-0.159484	-0.372219	-0.4891																	13.01	0.061539	0.154641
		-0.0343636	-0.372025	-0.488092																	13.04	0.060769	0.152464
		0.129353	-0.371933	-0.48794																	13.07	0.060042	0.150299
		0.202441	-0.37178	-0.487798																	13.1	0.059202	0.147727
		0.204931	-0.371729	-0.487559																	13.13	0.058483	0.145529
		-0.570692	-0.371274	-0.487256																	13.16	0.057784	0.143312
		0.0200463	-0.370696	-0.487169																	13.19	0.057103	0.141078
		0.199556	-0.370413	-0.486511																	13.22	0.056444	0.138851
		0.0372213	-0.369862	-0.486477																	13.25	0.055679	0.136269
		-0.248455	-0.369276	-0.486469																	13.28	0.05504	0.134116
		0.141432	-0.368838	-0.486105																	13.31	0.054278	0.131633
		0.149582	-0.368638	-0.485728																	13.34	0.053725	0.129571
		0.127252	-0.368608	-0.485262																	13.37	0.05298	0.12759
		-0.38994	-0.368605	-0.485245																	13.4	0.052376	0.125665
		0.155041	-0.36832	-0.484724																	13.43	0.051777	0.123813
		0.00706721	-0.368295	-0.48414																	13.46	0.051079	0.121728
		-0.0942736	-0.367791	-0.484126																	13.49	0.050472	0.119986
		0.306364	-0.367642	-0.483783																	13.52	0.04974	0.11797
		0.309859	-0.36725	-0.483607																	13.55	0.049227	0.116566
		-0.188111	-0.367176	-0.483535																	13.58	0.04862	0.114925
		-0.204867	-0.366723	-0.482834																	13.61	0.047889	0.113043
		-0.270162	-0.366155	-0.482592																	13.64	0.047281	0.111479
		-0.414353	-0.366105	-0.482172																	13.67	0.0466	0.109668
		-0.15301	-0.365885	-0.482155																	13.7	0.046004	0.1081
		0.106567	-0.365811	-0.481573																	13.73	0.045521	0.106806
		-0.583773	-0.365545	-0.48136																	13.76	0.044876	0.104989
		-0.0653338	-0.36544	-0.480639																	13.79	0.044364	0.103446
		0.00843523	-0.363932	-0.480526																	13.82	0.043757	0.101649
		0.148594	-0.362844	-0.480387																	13.85	0.043266	0.100141
		-0.0334083	-0.362516	-0.480199																	13.88	0.042713	0.098405
		-0.404609	-0.362436	-0.479947																	13.91	0.042307	0.097188
		0.254647	-0.3621	-0.479785																	13.94	0.041821	0.095729
		0.0258902	-0.361503	-0.479373																	13.97	0.041285	0.094011
		-0.303445	-0.361005	-0.477846																	14	0.040837	0.092547
		-0.204609	-0.360882	-0.477781																	14.03	0.040333	0.090839
		0.124513	-0.360788	-0.477761																	14.06	0.039926	0.089376
		0.0498157	-0.360702	-0.477715																	14.09	0.039582	0.087942
		-0.099088	-0.360415	-0.477652																	14.12	0.03909	0.086496
		0.299836	-0.360211	-0.477429																	14.15	0.038684	0.085056
		-0.595638	-0.360135	-0.477103																	14.18	0.038217	0.083391
		-0.109174	-0.359768	-0.476742																	14.21	0.037796	0.082007
		-0.417918	-0.359301	-0.476411																	14.24	0.037384	0.080681
		0.14049	-0.359104	-0.476067																	14.27	0.036919	0.079205
		0.153509	-0.359016	-0.475973																	14.3	0.036582	0.078185
		0.153827	-0.358789	-0.475619																	14.33	0.036108	0.0768
		-0.100761	-0.358593	-0.47552																	14.36	0.035702	0.075639
		-0.188545	-0.358468	-0.47494																	14.39	0.03529	0.074461
		-0.0707281	-0.358464	-0.474565																	14.42	0.03482	0.073099
		-0.178586	-0.358149	-0.474161																	14.45	0.034427	0.071928
		0.175331	-0.357827	-0.473784																	14.48	0.034004	0.070777
		-0.0493208	-0.357472	-0.473194																	14.51	0.033595	0.069673
		0.251916	-0.35711	-0.473161																	14.54	0.033119	0.068394
		-0.321436	-0.35676	-0.472982																	14.57	0.032734	0.067316
		0.0859223	-0.356534	-0.472952																	14.6	0.032361	0.06624
		-0.260218	-0.356261	-0.472762																	14.63	0.031929	0.064997
		-0.35058	-0.355769	-0.472359																	14.66	0.031626	0.063957
		0.112808	-0.355735	-0.472022																	14.69	0.031213	0.062945
		-0.349216	-0.35559	-0.472017																	14.72	0.030862	0.061957
		-0.231545	-0.355529	-0.471207																	14.75	0.030531	0.060987
		-0.349892	-0.355117	-0.470925																	14.78	0.030164	0.059877
		-0.618569	-0.355088	-0.47077																	14.81	0.029844	0.058917
		-0.303283	-0.355023	-0.470593																	14.84	0.029482	0.057845
		-0.291725	-0.354738	-0.470494																	14.87	0.029233	0.057067
		-0.286193	-0.354583	-0.47																	14.9	0.028927	0.056165
		-0.046736	-0.354166	-0.469461																	14.93	0.028587	0.055115
		-0.445808	-0.353751	-0.468894																	14.96	0.028302	0.054224
		-0.0910068	-0.353264	-0.46844																	14.99	0.027974	0.053199
		-0.350862	-0.353187	-0.46829																	15.02	0.027679	0.052312
		-0.0030946	-0.352933	-0.467908																	15.05	0.027379	0.051429
		0.289501	-0.352325	-0.467878																	15.08	0.027074	0.050571
		-0.267376	-0.35194	-0.467862																	15.11	0.026745	0.049716
		0.310365	-0.351461	-0.46755																	15.14	0.026397	0.048728
		0.184908	-0.350863	-0.467431																	15.17	0.026113	0.047936
		0.136612	-0.350862	-0.467244																	15.2	0.025765	0.047037
		-0.0927028	-0.350701	-0.466673																	15.23	0.025526	0.046403
		-0.274412	-0.350548	-0.466397																	15.26	0.025248	0.045664
		-0.252322	-0.35043	-0.4658																	15.29	0.024918	0.044829
		-0.241277	-0.35038	-0.46538																	15.32	0.024635	0.044137
		0.118956	-0.349892	-0.465298																	15.35	0.024285	0.043328
		-0.0575006	-0.349783	-0.465038																	15.38	0.023993	0.042635
		0.112392	-0.349611	-0.464991																	15.41	0.023699	0.041957
		-0.383437	-0.349445	-0.464474																	15.44	0.023419	0.04131
		-0.210489	-0.349346	-0.464353																	15.47	0.023122	0.04068
		-0.212688	-0.349307	-0.464301																	15.5	0.022767	0.039963
		-0.323095	-0.349291	-0.464256																	15.53	0.022483	0.039341
		0.132811	-0.349216	-0.463884																	15.56	0.022212	0.038721
		-0.375657	-0.348927	-0.463684																	15.59	0.021899	0.03803
		-1.20096	-0.348923	-0.463512																	15.62	0.021681	0.037563
		-0.194027	-0.348646	-0.463317																	15.65	0.021384	0.036925
		0.0278905	-0.348305	-0.463165																	15.68	0.021121	0.03638
		0.0297689	-0.348132	-0.462624																	15.71	0.020848	0.03574
		-1.20599	-0.348041	-0.462409																	15.74	0.020604	0.03522
		0.0354257	-0.347687	-0.462245																	15.77	0.020366	0.034699
		0.0506309	-0.347643	-0.462104																	15.8	0.020115	0.034179
		0.0465652	-0.34655	-0.461035																	15.83	0.019861	0.033677
		0.0107315	-0.346394	-0.461025																	15.86	0.019613	0.033119
		-0.435236	-0.34628	-0.460614																	15.89	0.019381	0.032647
		0.065173	-0.346218	-0.46023																	15.92	0.019144	0.032189
		-0.241979	-0.346176	-0.459552																	15.95	0.018887	0.031672
		-0.423452	-0.346097	-0.459232																	15.98	0.018716	0.031207
		0.103022	-0.345932	-0.459225																	16.01	0.018474	0.030744
		-0.256267	-0.345326	-0.458893																	16.04	0.018264	0.030326
		0.073838	-0.344538	-0.458762																	16.07	0.01805	0.029906
		0.170106	-0.344509	-0.458568																	16.1	0.017804	0.029424
		-0.0651845	-0.344418	-0.458513																	16.13	0.017584	0.029035
		0.182775	-0.343503	-0.45807																	16.16	0.017341	0.028586
		-0.146776	-0.343463	-0.457747																	16.19	0.017167	0.028269
		0.289556	-0.343385	-0.457725																	16.22	0.01692	0.027871
		-0.270056	-0.343384	-0.457669																	16.25	0.016714	0.027536
		0.29331	-0.343321	-0.457499																	16.28	0.016506	0.027207
		-0.387676	-0.343217	-0.457312																	16.31	0.016265	0.02683
		0.0185478	-0.343059	-0.457219																	16.34	0.016068	0.026525
		0.0192575	-0.343056	-0.457128																	16.37	0.015879	0.026221
		0.0212192	-0.342865	-0.456169																	16.4	0.015671	0.025921
		-0.29583	-0.342766	-0.455727																	16.43	0.015467	0.025626
		-0.386385	-0.342674	-0.455593																	16.46	0.015247	0.025256
		0.29102	-0.342672	-0.455539																	16.49	0.015077	0.024946
		0.00273399	-0.342618	-0.455499																	16.52	0.014887	0.024588
		0.183407	-0.342436	-0.455308																	16.55	0.014744	0.024357
		-0.46755	-0.341795	-0.455209																	16.58	0.014568	0.024071
		0.356757	-0.341575	-0.455176																	16.61	0.014378	0.023729
		0.359062	-0.341329	-0.455124																	16.64	0.014219	0.023429
		0.184378	-0.341275	-0.455111																	16.67	0.014054	0.023091
		-0.37933	-0.341242	-0.455001																	16.7	0.013911	0.02282
		-0.0745634	-0.341054	-0.454878																	16.73	0.013786	0.022526
		0.180111	-0.3407	-0.454731																	16.76	0.013637	0.022244
		0.568827	-0.340206	-0.454694																	16.79	0.013528	0.021979
		-0.156228	-0.339958	-0.454665																	16.82	0.013367	0.021661
		0.322577	-0.3399	-0.454542																	16.85	0.013225	0.021391
		-0.477652	-0.339769	-0.454413																	16.88	0.013073	0.021083
		-0.398827	-0.339737	-0.454077																	16.91	0.012958	0.02082
		-0.0686219	-0.339664	-0.453677																	16.94	0.012847	0.020602
		-0.149208	-0.339357	-0.453146																	16.97	0.012694	0.020306
		-0.202944	-0.339178	-0.452747																	17	0.01254	0.020065
		-0.0621202	-0.339115	-0.452512																	17.03	0.012374	0.019817
		-0.312371	-0.338842	-0.452428																	17.06	0.012221	0.019616
		0.183214	-0.338826	-0.452133																	17.09	0.012074	0.019397
		-0.402788	-0.338535	-0.451945																	17.12	0.011948	0.019193
		-0.31106	-0.338275	-0.451111																	17.15	0.011801	0.019015
		-0.441225	-0.338267	-0.450583																	17.18	0.011629	0.018785
		-0.343923	-0.337978	-0.450248																	17.21	0.011486	0.018601
		-0.343481	-0.337819	-0.449621																	17.24	0.011357	0.018404
		-0.0439656	-0.33753	-0.449388																	17.27	0.011211	0.018195
		-0.0247367	-0.337045	-0.449305																	17.3	0.011097	0.018027
		-0.443709	-0.336847	-0.448587																	17.33	0.010936	0.017854
		-0.412392	-0.336259	-0.448408																	17.36	0.010806	0.017669
		-0.423727	-0.335833	-0.448365																	17.39	0.010687	0.017455
		-0.0535168	-0.335338	-0.448276																	17.42	0.010586	0.017279
		0.307632	-0.335291	-0.447985																	17.45	0.010483	0.017105
		-0.408955	-0.33523	-0.447934																	17.48	0.010376	0.0169
		0.211264	-0.33516	-0.447748																	17.51	0.010304	0.016761
		-0.229332	-0.334825	-0.447719																	17.54	0.010201	0.016538
		-0.324159	-0.334798	-0.447697																	17.57	0.010111	0.016361
		-0.554532	-0.334741	-0.447559																	17.6	0.010026	0.016168
		0.0124359	-0.33454	-0.447																	17.63	0.009929	0.015956
		-0.397572	-0.333967	-0.446767																	17.66	0.009848	0.015786
		0.00644464	-0.333914	-0.446211																	17.69	0.009779	0.015617
		-0.273725	-0.333895	-0.445928																	17.72	0.009712	0.01546
		0.38147	-0.333268	-0.44583																	17.75	0.009625	0.015303
		0.0165806	-0.333192	-0.445808																	17.78	0.009506	0.015114
		-0.242528	-0.33313	-0.445616																	17.81	0.009412	0.014944
		0.0102191	-0.332776	-0.445221																	17.84	0.009323	0.01475
		-0.210486	-0.332595	-0.445151																	17.87	0.009248	0.014611
		0.420345	-0.332383	-0.444522																	17.9	0.009158	0.014446
		-0.287535	-0.332347	-0.443936																	17.93	0.009063	0.014281
		-0.237118	-0.331806	-0.443913																	17.96	0.008959	0.014165
		-0.194934	-0.331768	-0.443709																	17.99	0.008864	0.013992
		-0.431943	-0.331733	-0.443658																	18.02	0.008782	0.01387
		-0.195938	-0.331466	-0.443542																	18.06	0.008696	0.01373
		0.14151	-0.331305	-0.443388																	18.08	0.008609	0.013634
		-0.0599736	-0.331207	-0.44328																	18.11	0.008514	0.013508
		-0.124812	-0.330967	-0.44186																	18.14	0.008413	0.013375
		-0.20558	-0.33053	-0.441688																	18.17	0.008335	0.013251
		-0.200187	-0.330442	-0.44147																	18.2	0.008227	0.013109
		-0.0219466	-0.330403	-0.441459																	18.23	0.008155	0.012999
		-0.229464	-0.330192	-0.441367																	18.26	0.008086	0.012923
		0.561954	-0.329921	-0.441357																	18.29	0.008005	0.012795
		-0.0346215	-0.329387	-0.440357																	18.32	0.00794	0.012681
		-0.275149	-0.329122	-0.440208																	18.35	0.00788	0.012556
		0.0142618	-0.328691	-0.439822																	18.38	0.007818	0.012448
		-0.243792	-0.328109	-0.439814																	18.41	0.007758	0.01235
		0.170071	-0.327929	-0.439561																	18.44	0.007706	0.012232
		-0.246109	-0.327912	-0.439514																	18.47	0.007648	0.01212
		-0.24947	-0.327793	-0.43936																	18.5	0.007574	0.011978
		-0.0143224	-0.327379	-0.439258																	18.53	0.007523	0.011868
		-0.039745	-0.326869	-0.439042																	18.56	0.007466	0.011757
		-0.22368	-0.326597	-0.438965																	18.59	0.007409	0.011643
		0.0646918	-0.326577	-0.438835																	18.62	0.007381	0.011532
		0.451961	-0.326409	-0.438794																	18.65	0.007343	0.011428
		-0.315149	-0.326132	-0.438721																	18.68	0.007283	0.011342
		-0.21941	-0.32601	-0.438588																	18.71	0.007226	0.011233
		0.0645532	-0.325902	-0.438433																	18.74	0.007177	0.01114
		0.080689	-0.325899	-0.438405																	18.74	0.007171	0.011123
		-0.160005	-0.325858	-0.43774																	18.77	0.007141	0.011046
		0.332895	-0.325835	-0.437536																	18.8	0.0071	0.010918
		0.0845674	-0.325492	-0.437395																	18.83	0.007054	0.010832
		-0.0130666	-0.325392	-0.437256																	18.86	0.006977	0.01073
		-0.0671777	-0.325146	-0.437162																	18.89	0.006922	0.010655
		0.557597	-0.325073	-0.436842																	18.92	0.006882	0.010577
		0.282799	-0.325018	-0.436074																	18.95	0.00683	0.010489
		-0.23142	-0.324909	-0.43601																	18.98	0.006778	0.01041
		0.213803	-0.324676	-0.435872																	19.01	0.006722	0.010348
		-0.1299	-0.324462	-0.435852																	19.04	0.006663	0.010288
		-0.233824	-0.324444	-0.435609																	19.07	0.006614	0.010229
		0.0370797	-0.324276	-0.435269																	19.1	0.006565	0.010145
		0.376889	-0.324159	-0.435258																	19.13	0.006514	0.010088
		-0.0197861	-0.3239	-0.435236																	19.16	0.006452	0.010032
		-0.186663	-0.323848	-0.435193																	19.19	0.006407	0.009993
		-0.245816	-0.323817	-0.434875																	19.22	0.006356	0.009934
		0.127043	-0.322786	-0.434575																	19.25	0.006321	0.009875
		0.0887122	-0.322599	-0.434066																	19.28	0.006283	0.00982
		-0.235931	-0.322084	-0.433748																	19.31	0.006214	0.009768
		-0.37664	-0.321867	-0.4335																	19.34	0.006182	0.009714
		-0.36544	-0.321436	-0.433208																	19.37	0.006142	0.009652
		0.0035072	-0.32141	-0.433078																	19.4	0.006108	0.009601
		-0.0724439	-0.321163	-0.432266																	19.43	0.00608	0.009547
		-0.065096	-0.320935	-0.43222																	19.46	0.006046	0.009486
		0.492546	-0.320564	-0.431968																	19.49	0.006008	0.00944
		-0.114102	-0.31999	-0.431943																	19.52	0.005972	0.009378
		-0.108915	-0.319272	-0.431464																	19.55	0.005952	0.009327
		0.189941	-0.319261	-0.431386																	19.58	0.005933	0.009284
		0.0016292	-0.319202	-0.43089																	19.61	0.005897	0.009226
		-0.417061	-0.31882	-0.430556																	19.64	0.005867	0.009201
		-0.486511	-0.318559	-0.429538																	19.67	0.005839	0.009149
		0.164268	-0.318047	-0.429308																	19.7	0.005826	0.009095
		-0.402648	-0.317686	-0.429254																	19.73	0.00581	0.009039
		0.035235	-0.31729	-0.42899																	19.76	0.005788	0.009009
		-0.523876	-0.316905	-0.428901																	19.79	0.005766	0.008977
		0.192895	-0.316862	-0.428749																	19.82	0.005745	0.008938
		0.136462	-0.31642	-0.428619																	19.85	0.005721	0.008899
		-0.375991	-0.316419	-0.428361																	19.88	0.005692	0.008858
		-0.134352	-0.316041	-0.428352																	19.91	0.005663	0.008835
		0.00960711	-0.316003	-0.42829																	19.94	0.005638	0.008827
		-0.123438	-0.315846	-0.428118																	19.97	0.005607	0.008799
		-0.116458	-0.315657	-0.427763																	20	0.005591	0.008766
		-0.0798059	-0.315335	-0.427065																	20.03	0.005574	0.008749
		0.167377	-0.315186	-0.426827																	20.06	0.005549	0.008731
		-0.277751	-0.314273	-0.426467																	20.09	0.005523	0.008717
		-0.375663	-0.314003	-0.426127																	20.12	0.005498	0.008686
		0.199287	-0.313644	-0.426036																	20.15	0.005491	0.008661
		-0.185805	-0.313362	-0.425918																	20.18	0.005494	0.008648
		-0.184133	-0.31333	-0.425556																	20.21	0.005472	0.008627
		-0.170709	-0.312911	-0.425549																	20.24	0.005455	0.008618
		-0.172267	-0.312544	-0.425477																	20.27	0.00545	0.008609
		-0.131299	-0.311874	-0.425474																	20.3	0.005444	0.008565
		-0.378331	-0.31184	-0.425421																	20.33	0.005441	0.008543
		-0.122857	-0.311406	-0.425056																	20.36	0.005437	0.008532
		-0.27634	-0.311253	-0.425019																	20.39	0.005436	0.008521
		0.157571	-0.311062	-0.424739																	20.42	0.005436	0.008492
		-0.444584	-0.310867	-0.424518																	20.45	0.005445	0.008451
		0.274903	-0.310796	-0.424286																	20.48	0.005453	0.008404
		-0.387668	-0.310607	-0.424082																	20.51	0.005448	0.008384
		-0.150033	-0.31058	-0.423996																	20.54	0.005436	0.008378
		0.167452	-0.310408	-0.423905																	20.57	0.005439	0.008364
		0.207135	-0.310356	-0.423741																	20.6	0.005453	0.008341
		-0.365545	-0.31019	-0.423727																	20.63	0.005478	0.008312
		-0.015042	-0.310124	-0.423572																	20.66	0.005489	0.008298
		0.502309	-0.309954	-0.423452																	20.69	0.005488	0.008276
		-0.441357	-0.309312	-0.423274																	20.72	0.005477	0.008261
		-0.218617	-0.307868	-0.422822																	20.75	0.005475	0.008243
		0.071385	-0.307545	-0.422742																	20.78	0.005492	0.008204
		-0.248439	-0.307384	-0.422731																	20.81	0.005502	0.008177
		0.0846207	-0.307368	-0.422455																	20.84	0.0055	0.008159
		-0.448587	-0.307195	-0.422342																	20.87	0.005486	0.008143
		-0.453146	-0.307164	-0.421923																	20.9	0.005486	0.008129
		-0.161465	-0.307057	-0.421909																	20.93	0.005496	0.008097
		0.287716	-0.30704	-0.421791																	20.96	0.005497	0.00807
		-0.410546	-0.30699	-0.421747																	20.99	0.005485	0.00805
		-0.692701	-0.306699	-0.421615																	21.02	0.005482	0.008042
		-0.170587	-0.306173	-0.421428																	21.05	0.005492	0.008022
		0.56696	-0.306067	-0.420997																	21.08	0.005496	0.008004
		-0.0697894	-0.306033	-0.420632																	21.11	0.005494	0.007979
		-0.365414	-0.305253	-0.420615																	21.14	0.005493	0.007964
		-0.156313	-0.304784	-0.420315																	21.17	0.005489	0.007955
		-0.395717	-0.304662	-0.419372																	21.2	0.005497	0.007947
		0.482688	-0.304563	-0.41927																	21.23	0.005512	0.007924
		-0.129125	-0.304546	-0.41892																	21.26	0.005526	0.007908
		0.511085	-0.304283	-0.418847																	21.29	0.005537	0.0079
		0.129289	-0.304145	-0.418786																	21.32	0.005527	0.00789
		0.0919101	-0.304042	-0.418591																	21.35	0.005534	0.007875
		-0.405205	-0.30403	-0.418261																	21.38	0.005555	0.007853
		-0.594769	-0.304008	-0.4181																	21.41	0.005572	0.007829
		0.062254	-0.303649	-0.417918																	21.44	0.005588	0.007818
		0.0699945	-0.303525	-0.417884																	21.47	0.005586	0.007813
		0.0685474	-0.303445	-0.417781																	21.5	0.005588	0.007796
		0.406198	-0.303389	-0.417768																	21.53	0.005588	0.007779
		-0.528448	-0.303092	-0.417643																	21.56	0.005598	0.007757
		-0.399205	-0.302914	-0.417375																	21.59	0.005617	0.007749
		-0.159334	-0.302888	-0.417339																	21.62	0.005626	0.007738
		0.0123915	-0.302444	-0.417157																	21.65	0.005621	0.007731
		-0.058084	-0.302405	-0.417061																	21.68	0.005626	0.007721
		0.0160913	-0.302042	-0.416885																	21.71	0.005638	0.007708
		0.141175	-0.301932	-0.416833																	21.74	0.005637	0.007698
		0.143952	-0.301917	-0.416686																	21.77	0.005631	0.007694
		-0.0364802	-0.301911	-0.416625																	21.8	0.005632	0.007674
		-0.157406	-0.301884	-0.416561																	21.83	0.005632	0.007665
		0.132898	-0.301809	-0.416403																	21.86	0.005635	0.007654
		-0.0222703	-0.301791	-0.416161																	21.89	0.005636	0.007652
		0.239447	-0.301739	-0.416132																	21.92	0.005631	0.007637
		-0.0430657	-0.301089	-0.416047																	21.95	0.005632	0.007646
		0.180081	-0.300965	-0.416043																	21.98	0.005631	0.007638
		-0.490009	-0.300911	-0.415708																	22.01	0.005638	0.007632
		0.371482	-0.300864	-0.415679																	22.04	0.005648	0.007637
		-0.246767	-0.300576	-0.415317																	22.07	0.005637	0.007663
		-0.325073	-0.300536	-0.415265																	22.1	0.005634	0.00767
		-0.241849	-0.300415	-0.415158																	22.13	0.005631	0.007685
		0.377464	-0.30025	-0.414959																	22.16	0.005634	0.007683
		0.0861398	-0.29985	-0.414535																	22.19	0.005646	0.007686
		-0.467244	-0.299774	-0.414359																	22.22	0.005643	0.00771
		-0.281459	-0.299737	-0.414353																	22.25	0.005642	0.007727
		-0.268683	-0.299701	-0.414247																	22.28	0.005637	0.007731
		-0.354752	-0.299415	-0.414211																	22.31	0.00564	0.007748
		-0.393454	-0.299368	-0.414166																	22.34	0.005643	0.007766
		-0.387658	-0.299308	-0.414																	22.37	0.005635	0.007778
		-0.275091	-0.298988	-0.413982																	22.4	0.005628	0.007788
		0.0598524	-0.298869	-0.413567																	22.43	0.005634	0.007806
		0.125088	-0.298796	-0.413278																	22.46	0.005644	0.007819
		-0.268753	-0.298543	-0.413106																	22.49	0.005644	0.007817
		-0.185304	-0.298315	-0.413059																	22.52	0.005649	0.007834
		-0.303649	-0.297845	-0.413037																	22.55	0.005654	0.007859
		-0.11449	-0.297594	-0.41294																	22.58	0.005656	0.007878
		-0.286967	-0.297431	-0.412843																	22.61	0.005675	0.007884
		-0.317686	-0.297346	-0.412791																	22.64	0.005685	0.00789
		-0.187378	-0.297333	-0.412703																	22.67	0.005688	0.007917
		-0.114703	-0.296789	-0.412392																	22.7	0.005676	0.007935
		-0.338267	-0.296455	-0.411896																	22.73	0.005681	0.007948
		-0.331733	-0.296185	-0.411887																	22.76	0.005682	0.007963
		-0.286254	-0.29583	-0.411864																	22.79	0.005686	0.007968
		-0.327793	-0.295014	-0.41185																	22.82	0.005701	0.007987
		0.0671192	-0.294631	-0.411738																	22.85	0.005687	0.008016
		-0.203291	-0.294295	-0.411717																	22.88	0.00568	0.008041
		-0.375328	-0.294246	-0.411635																	22.91	0.005686	0.008071
		-0.150475	-0.293346	-0.411515																	22.94	0.005692	0.008097
		-0.246581	-0.293312	-0.411277																	22.97	0.005689	0.008117
		-0.0625147	-0.293301	-0.41127																	23	0.005681	0.008138
		-0.193707	-0.292827	-0.411164																	23.03	0.005693	0.008164
		0.0741265	-0.29251	-0.41103																	23.06	0.00571	0.00818
		0.0161159	-0.292497	-0.410921																	23.09	0.005725	0.008203
		-0.0678614	-0.292253	-0.410889																	23.12	0.005725	0.008213
		0.052663	-0.291716	-0.41057																	23.15	0.005733	0.008238
		-0.0281556	-0.291297	-0.410546																	23.18	0.005734	0.008269
		-0.489547	-0.291172	-0.410186																	23.21	0.005741	0.008282
		-0.301089	-0.290968	-0.409939																	23.24	0.005773	0.008284
		-0.171816	-0.29075	-0.409713																	23.27	0.005798	0.008307
		0.0493318	-0.290665	-0.409596																	23.3	0.005803	0.008318
		-0.37178	-0.290499	-0.40932																	23.33	0.005821	0.008345
		-0.100464	-0.290262	-0.409109																	23.36	0.005843	0.008349
		-0.0131731	-0.289952	-0.408955																	23.39	0.005866	0.00833
		-0.370472	-0.289745	-0.408665																	23.42	0.005884	0.008325
		-0.35711	-0.289024	-0.408625																	23.45	0.005906	0.008345
		0.121905	-0.288995	-0.408351																	23.48	0.005929	0.008367
		-0.354166	-0.288621	-0.408174																	23.51	0.005959	0.008379
		-0.349291	-0.288605	-0.407793																	23.54	0.005993	0.008387
		-0.0960818	-0.288224	-0.40776																	23.57	0.006019	0.00838
		-0.288143	-0.288143	-0.407701																	23.6	0.006042	0.008376
		-0.197808	-0.287856	-0.407676																	23.63	0.006059	0.008388
		-0.069136	-0.287371	-0.407543																	23.66	0.006075	0.008396
		0.157129	-0.287328	-0.407408																	23.69	0.00611	0.00838
		-0.228741	-0.28729	-0.407258																	23.72	0.00613	0.008366
		-0.384112	-0.286732	-0.407184																	23.75	0.006144	0.008354
		-0.066243	-0.286713	-0.407158																	23.78	0.006154	0.008354
		-0.102192	-0.286422	-0.407094																	23.81	0.006168	0.00835
		-0.24942	-0.286401	-0.40708																	23.84	0.006191	0.008337
		-0.264134	-0.286324	-0.406998																	23.87	0.006218	0.008316
		-0.472982	-0.28623	-0.406927																	23.9	0.00624	0.008327
		-0.262452	-0.285759	-0.406871																	23.93	0.006241	0.008344
		-0.0467369	-0.285353	-0.406854																	23.96	0.006253	0.008349
		-0.0616381	-0.284531	-0.406739																	23.99	0.006278	0.008333
		-0.567841	-0.284373	-0.406487																	24.02	0.006309	0.008311
		0.027998	-0.28403	-0.40635																	24.05	0.006332	0.008296
		-0.557842	-0.28393	-0.406342																	24.08	0.006341	0.008294
		0.0508728	-0.283922	-0.406212																	24.11	0.006353	0.008295
		-0.175112	-0.283906	-0.406117																	24.14	0.006367	0.008275
		0.363384	-0.283185	-0.406082																	24.17	0.006404	0.008252
		-0.0540434	-0.283131	-0.406028																	24.2	0.006424	0.008244
		-0.0512224	-0.282955	-0.405676																	24.23	0.006438	0.008244
		-0.0103855	-0.282304	-0.405439																	24.26	0.006453	0.008237
		-0.0811335	-0.282161	-0.405434																	24.29	0.006472	0.008225
		-0.355117	-0.281798	-0.405291																	24.32	0.006509	0.008205
		-0.12255	-0.281761	-0.405205																	24.35	0.006545	0.008181
		-0.454878	-0.2813	-0.405158																	24.38	0.00656	0.008173
		-0.0878268	-0.281168	-0.404708																	24.41	0.006577	0.008153
		-0.290336	-0.280895	-0.404626																	24.44	0.006598	0.008113
		-0.0929318	-0.280678	-0.404609																	24.47	0.006626	0.008087
		0.129004	-0.280658	-0.404228																	24.5	0.006654	0.008063
		-0.244268	-0.280625	-0.404085																	24.53	0.006675	0.008036
		-0.496316	-0.280273	-0.404075																	24.56	0.00669	0.008014
		-0.143275	-0.280261	-0.40405																	24.59	0.006709	0.007988
		-0.0416751	-0.280173	-0.404003																	24.63	0.006738	0.007962
		-0.44163	-0.280056	-0.403896																	24.65	0.006766	0.007931
		-0.437162	-0.279929	-0.403892																	24.68	0.006797	0.00791
		-0.304145	-0.27986	-0.403862																	24.68	0.006798	0.007906
		-0.247759	-0.279738	-0.403846																	24.71	0.006806	0.007885
		-0.19043	-0.279658	-0.403443																	24.74	0.006812	0.007862
		0.16224	-0.279444	-0.40285																	24.77	0.006825	0.00783
		-0.103253	-0.278917	-0.402788																	24.8	0.006843	0.007797
		0.0056715	-0.278791	-0.402648																	24.83	0.006858	0.007778
		0.00536106	-0.278768	-0.40234																	24.86	0.006864	0.00776
		-0.0226758	-0.278334	-0.402332																	24.89	0.006869	0.007743
		0.162869	-0.278326	-0.40223																	24.92	0.006874	0.007716
		0.0114009	-0.278238	-0.401409																	24.95	0.006879	0.007708
		-0.232591	-0.277327	-0.401379																	24.98	0.006896	0.007691
		-0.507664	-0.277209	-0.400978																	25.01	0.006903	0.007675
		0.01335	-0.276395	-0.400893																	25.04	0.006904	0.007667
		0.246716	-0.276336	-0.400591																	25.07	0.006928	0.007645
		-0.175084	-0.27622	-0.400398																	25.1	0.006953	0.007617
		-0.132707	-0.276082	-0.400381																	25.13	0.006959	0.007596
		-0.564566	-0.275977	-0.400329																	25.16	0.006966	0.007582
		0.808201	-0.275951	-0.399911																	25.19	0.006964	0.00756
		-0.060873	-0.275805	-0.399336																	25.22	0.006972	0.00754
		0.191292	-0.275442	-0.399205																	25.25	0.006986	0.007508
		-0.0537393	-0.27521	-0.398964																	25.28	0.006983	0.007488
		-0.0790251	-0.275091	-0.398827																	25.31	0.006993	0.007475
		-0.495136	-0.274716	-0.398499																	25.34	0.007004	0.007447
		0.0726324	-0.274535	-0.398336																	25.37	0.007017	0.007411
		-0.543771	-0.274494	-0.398209																	25.4	0.007033	0.00738
		0.102669	-0.274204	-0.398152																	25.43	0.007036	0.00735
		-0.343864	-0.274185	-0.398105																	25.46	0.007031	0.007322
		-0.488092	-0.273976	-0.397697																	25.49	0.00702	0.007312
		0.00742364	-0.273463	-0.397572																	25.52	0.007022	0.007275
		0.0104575	-0.273213	-0.39699																	25.55	0.007031	0.007235
		-0.133259	-0.272753	-0.396771																	25.58	0.007036	0.007198
		-0.480387	-0.272464	-0.396739																	25.61	0.007028	0.007178
		-0.173873	-0.27244	-0.396543																	25.64	0.007015	0.007146
		-0.477103	-0.271901	-0.396528																	25.67	0.007031	0.007119
		-0.166722	-0.271896	-0.396264																	25.7	0.007034	0.007092
		-0.0209838	-0.271673	-0.395983																	25.73	0.007039	0.007067
		0.144552	-0.271402	-0.395939																	25.76	0.007031	0.007055
		-0.24151	-0.271093	-0.395879																	25.79	0.007031	0.007041
		-0.128737	-0.271067	-0.395855																	25.82	0.007022	0.007026
		-0.146826	-0.270441	-0.395721																	25.85	0.007007	0.007002
		0.0397959	-0.270253	-0.395717																	25.88	0.007011	0.006963
		-0.186224	-0.270186	-0.395627																	25.91	0.006992	0.00696
		0.340324	-0.27018	-0.394998																	25.94	0.006978	0.006964
		-0.148316	-0.269877	-0.394902																	25.97	0.006974	0.006947
		-0.312779	-0.26987	-0.39392																	26	0.006981	0.006925
		-0.137733	-0.269669	-0.393901																	26.03	0.006987	0.006903
		-0.0365888	-0.269539	-0.393624																	26.06	0.006987	0.006884
		-0.0520275	-0.269074	-0.393454																	26.09	0.006985	0.006872
		-0.383943	-0.268952	-0.393394																	26.12	0.006983	0.006857
		-0.010076	-0.268888	-0.393173																	26.15	0.006983	0.006843
		0.0299216	-0.268753	-0.393066																	26.18	0.006978	0.006818
		-0.130062	-0.268023	-0.393026																	26.21	0.006975	0.006804
		-0.0186777	-0.267554	-0.39298																	26.24	0.006948	0.006797
		-0.0068571	-0.267384	-0.392769																	26.27	0.006949	0.006784
		-0.128126	-0.267376	-0.392734																	26.3	0.00694	0.006764
		-0.58804	-0.267361	-0.392522																	26.33	0.006945	0.006733
		-0.265994	-0.267255	-0.392471																	26.36	0.006946	0.006727
		-0.583097	-0.267066	-0.392258																	26.39	0.006929	0.006716
		-0.568564	-0.266485	-0.392074																	26.42	0.006931	0.006709
		-0.265627	-0.266246	-0.391954																	26.45	0.006936	0.00669
		-0.0447363	-0.265588	-0.391587																	26.48	0.006935	0.006663
		-0.0229702	-0.265324	-0.391534																	26.51	0.006927	0.006649
		-0.0188808	-0.265181	-0.391123																	26.54	0.006907	0.006648
		-0.214179	-0.264667	-0.390961																	26.57	0.0069	0.006636
		-0.211689	-0.264647	-0.39087																	26.6	0.006895	0.006626
		-0.111903	-0.264134	-0.390533																	26.63	0.006888	0.006608
		-0.0864335	-0.263984	-0.390474																	26.66	0.006888	0.00659
		-0.0873974	-0.263885	-0.390302																	26.69	0.006884	0.006602
		0.0863757	-0.263458	-0.390299																	26.72	0.006869	0.0066
		-0.249483	-0.263348	-0.38994																	26.75	0.006867	0.006591
		-0.335507	-0.263118	-0.389891																	26.78	0.006862	0.006578
		-0.38866	-0.262693	-0.389837																	26.81	0.006852	0.006576
		-0.276788	-0.262452	-0.389506																	26.84	0.006845	0.006584
		-0.334741	-0.262075	-0.389311																	26.87	0.006838	0.006596
		-0.0257525	-0.262075	-0.38896																	26.9	0.006836	0.006605
		-0.120268	-0.261889	-0.38866																	26.93	0.006833	0.006619
		-0.330327	-0.261429	-0.388481																	26.96	0.006824	0.006634
		-0.43936	-0.261245	-0.388136																	26.99	0.006807	0.006638
		-0.371372	-0.260954	-0.387762																	27.03	0.006799	0.006645
		0.109268	-0.260795	-0.387676																	27.05	0.006792	0.006656
		-0.483783	-0.260558	-0.387668																	27.08	0.006793	0.006664
		-0.270479	-0.260218	-0.387658																	27.11	0.006796	0.006661
		-0.366105	-0.260051	-0.387488																	27.14	0.006794	0.006681
		-0.137969	-0.259673	-0.387438																	27.17	0.006776	0.006699
		-0.36725	-0.259305	-0.387425																	27.2	0.006748	0.006718
		-0.178739	-0.25909	-0.387349																	27.23	0.006745	0.006722
		-0.110908	-0.258945	-0.387341																	27.26	0.006744	0.006716
		-0.374531	-0.258722	-0.387245																	27.29	0.006742	0.006728
		-0.335261	-0.258247	-0.38719																	27.32	0.006726	0.006751
		-0.365113	-0.258065	-0.386618																	27.35	0.006704	0.006779
		-0.318058	-0.257717	-0.386504																	27.38	0.006694	0.006776
		0.00215649	-0.25759	-0.386385																	27.41	0.006697	0.006778
		-0.343738	-0.257188	-0.386261																	27.44	0.006678	0.006783
		-0.360882	-0.256934	-0.386213																	27.47	0.006653	0.00679
		-0.0906568	-0.256522	-0.385956																	27.5	0.006646	0.006793
		-0.216943	-0.256481	-0.385894																	27.53	0.006641	0.006807
		0.318207	-0.256267	-0.385685																	27.56	0.006633	0.006813
		0.0309951	-0.256191	-0.384797																	27.59	0.00661	0.006816
		-0.0135446	-0.256088	-0.384758																	27.62	0.006587	0.00683
		-0.0120779	-0.255959	-0.384586																	27.65	0.006582	0.006859
		-0.0666004	-0.255364	-0.384279																	27.68	0.006576	0.006869
		0.156528	-0.25501	-0.38417																	27.71	0.006563	0.006876
		0.175318	-0.254666	-0.384116																	27.74	0.006557	0.006883
		-0.0320639	-0.254508	-0.384112																	27.77	0.006544	0.006915
		-0.522787	-0.254323	-0.38395																	27.8	0.006526	0.006948
		-0.0764856	-0.254119	-0.383943																	27.83	0.006523	0.006961
		-0.192237	-0.254105	-0.383904																	27.86	0.006516	0.006981
		-0.225895	-0.253769	-0.383673																	27.89	0.006513	0.006995
		0.151828	-0.253238	-0.383661																	27.92	0.006495	0.007014
		-0.0941683	-0.252498	-0.38362																	27.95	0.006485	0.007048
		-0.119468	-0.252255	-0.383462																	27.98	0.006484	0.007068
		0.237805	-0.252239	-0.383437																	28.01	0.006485	0.007085
		-0.0020732	-0.252067	-0.383354																	28.04	0.006482	0.007106
		-0.395855	-0.251918	-0.383268																	28.07	0.006485	0.007132
		-0.367176	-0.251448	-0.382854																	28.1	0.006495	0.007159
		-0.378965	-0.250902	-0.382467																	28.13	0.006511	0.007174
		-0.12505	-0.250824	-0.382449																	28.16	0.006532	0.007186
		-0.382467	-0.250708	-0.382073																	28.19	0.006535	0.007202
		0.0107919	-0.250536	-0.381925																	28.22	0.006532	0.007204
		0.103289	-0.250107	-0.381886																	28.25	0.006535	0.007226
		0.0265754	-0.249927	-0.38179																	28.28	0.006528	0.007253
		0.168861	-0.249779	-0.381659																	28.31	0.006535	0.007269
		0.112391	-0.249731	-0.381574																	28.34	0.006554	0.007271
		-0.178067	-0.249483	-0.381279																	28.37	0.006566	0.007285
		0.117412	-0.24942	-0.381129																	28.4	0.006576	0.007292
		-0.118308	-0.24936	-0.380846																	28.43	0.006574	0.007295
		0.050189	-0.248687	-0.380726																	28.46	0.00658	0.00728
		-0.121757	-0.248395	-0.380677																	28.49	0.006605	0.007266
		-0.538179	-0.248232	-0.380528																	28.52	0.006623	0.00728
		-0.379259	-0.248031	-0.380503																	28.55	0.006618	0.007286
		0.0292352	-0.248004	-0.38029																	28.58	0.006638	0.007297
		-0.220077	-0.247984	-0.380208																	28.61	0.006655	0.007308
		-0.350639	-0.247882	-0.379859																	28.64	0.006673	0.007313
		-0.370343	-0.247741	-0.379819																	28.67	0.006691	0.007319
		0.0435715	-0.247624	-0.379746																	28.7	0.006703	0.007336
		-0.411515	-0.247428	-0.379583																	28.73	0.006724	0.007336
		0.173332	-0.247095	-0.37933																	28.76	0.00675	0.00734
		0.0307779	-0.247002	-0.379328																	28.79	0.006775	0.007325
		0.0705186	-0.246998	-0.379259																	28.82	0.006794	0.007338
		0.289297	-0.246839	-0.378965																	28.85	0.006812	0.007356
		-0.273659	-0.246767	-0.378859																	28.88	0.006815	0.007374
		-0.208703	-0.246708	-0.378837																	28.91	0.00684	0.007388
		0.1045	-0.245922	-0.378366																	28.94	0.006863	0.007373
		-0.466397	-0.245761	-0.378331																	28.97	0.006875	0.007375
		-0.0957506	-0.245626	-0.378307																	29	0.006888	0.007384
		-0.0325399	-0.245493	-0.378303																	29.03	0.006894	0.007395
		-0.356252	-0.245386	-0.378058																	29.06	0.006921	0.007385
		-0.448408	-0.245303	-0.377857																	29.09	0.006955	0.007374
		0.108011	-0.244741	-0.377786																	29.12	0.006968	0.007373
		0.177833	-0.244287	-0.377739																	29.15	0.00698	0.007386
		0.18443	-0.244154	-0.377632																	29.18	0.006995	0.007398
		0.182381	-0.243943	-0.377462																	29.21	0.00701	0.007393
		-0.0523783	-0.243901	-0.377355																	29.24	0.007025	0.007376
		-0.108169	-0.24374	-0.377136																	29.27	0.007038	0.007373
		-0.108386	-0.243533	-0.376738																	29.3	0.007044	0.007385
		-0.329737	-0.243368	-0.376725																	29.33	0.007052	0.00739
		-0.23147	-0.243177	-0.37664																	29.36	0.007068	0.007376
		0.205791	-0.243107	-0.376496																	29.39	0.007086	0.007367
		0.200691	-0.242927	-0.376428																	29.42	0.00711	0.007359
		0.10771	-0.242675	-0.37636																	29.45	0.007119	0.007348
		-0.250787	-0.242564	-0.376239																	29.48	0.007125	0.007347
		0.116956	-0.242494	-0.375991																	29.51	0.007127	0.007334
		0.168007	-0.242238	-0.375874																	29.54	0.007146	0.00732
		0.155616	-0.242167	-0.375667																	29.57	0.00716	0.007314
		-0.0266927	-0.241979	-0.375663																	29.6	0.007169	0.007302
		0.417604	-0.241849	-0.375657																	29.63	0.007175	0.007299
		0.42145	-0.241637	-0.375477																	29.67	0.007171	0.00728
		-0.48136	-0.241522	-0.37544																	29.69	0.007183	0.007285
		0.0425229	-0.24151	-0.375432																	29.72	0.00719	0.00728
		0.0663321	-0.241251	-0.375341																	29.75	0.007189	0.007281
		0.0693703	-0.241126	-0.375328																	29.78	0.007176	0.007295
		-0.126345	-0.240854	-0.375015																	29.81	0.007163	0.007295
		-0.0719136	-0.240581	-0.374906																	29.84	0.007179	0.007291
		0.185713	-0.240353	-0.374761																	29.87	0.007196	0.00728
		-0.213496	-0.240034	-0.374531																	29.9	0.007188	0.007286
		-0.31148	-0.239932	-0.374206																	29.93	0.007178	0.007303
		0.258455	-0.239807	-0.37378																	29.96	0.007168	0.007315
		0.272078	-0.239163	-0.373654																	29.99	0.00717	0.007318
		0.155888	-0.238461	-0.373562																	30.02	0.007175	0.007328
		-0.189412	-0.238417	-0.373258																	30.05	0.007146	0.007353
		0.0944984	-0.238337	-0.373131																	30.08	0.007118	0.007367
		0.19989	-0.237969	-0.372691																	30.11	0.007101	0.007376
		-0.0183742	-0.237506	-0.372465																	30.14	0.007095	0.007391
		-0.130427	-0.237418	-0.372441																	30.17	0.007085	0.007405
		-0.174729	-0.237237	-0.372219																	30.2	0.007068	0.007436
		-0.1147	-0.237156	-0.372025																	30.23	0.007047	0.007471
		-0.544553	-0.237133	-0.371933																	30.26	0.00703	0.007501
		0.43453	-0.236928	-0.371841																	30.29	0.007026	0.007532
		-0.0675499	-0.236714	-0.371818																	30.32	0.007024	0.00755
		0.169297	-0.236676	-0.37178																	30.35	0.007016	0.007596
		0.366077	-0.236458	-0.371729																	30.38	0.007003	0.007635
		-0.328066	-0.236372	-0.371574																	30.41	0.006983	0.007687
		0.441346	-0.23608	-0.371372																	30.44	0.006967	0.007726
		0.58393	-0.235931	-0.371274																	30.47	0.006963	0.007765
		-0.5836	-0.235928	-0.371049																	30.5	0.00696	0.007816
		0.118576	-0.235886	-0.370696																	30.53	0.006936	0.007862
		-0.0401348	-0.235795	-0.37069																	30.56	0.006926	0.007936
		-0.231655	-0.235656	-0.37059																	30.59	0.006934	0.007993
		0.113398	-0.235328	-0.370539																	30.62	0.006934	0.008038
		-0.337843	-0.235171	-0.370476																	30.63	0.006936	0.00805
		0.286958	-0.234587	-0.370472																	30.65	0.006938	0.008116
		-0.341329	-0.234564	-0.370413																	30.68	0.006934	0.008185
		0.390456	-0.234493	-0.370257																	30.71	0.006921	0.00826
		-1.19159	-0.234367	-0.370209																	30.74	0.006921	0.008342
		-0.348646	-0.233824	-0.370205																	30.77	0.006925	0.008426
		0.189062	-0.233647	-0.370068																	30.8	0.006909	0.00852
		-0.20359	-0.233566	-0.370062																	30.83	0.006898	0.008618
		-0.192811	-0.233492	-0.369862																	30.86	0.006888	0.008742
		-0.363932	-0.233378	-0.369714																	30.89	0.006881	0.008825
		0.0174618	-0.233347	-0.369436																	30.92	0.006876	0.008925
		-0.129218	-0.233231	-0.369326																	30.95	0.006871	0.009022
		-0.0931969	-0.233115	-0.369276																	30.99	0.00686	0.009124
		-0.485262	-0.232774	-0.369205																	31.01	0.006845	0.009242
		0.15383	-0.232743	-0.369094																	31.04	0.006829	0.009349
		0.184477	-0.232157	-0.368968																	31.07	0.00683	0.009446
		0.179178	-0.23176	-0.368838																	31.1	0.006836	0.009528
		0.178657	-0.231655	-0.368831																	31.13	0.006834	0.009634
		0.00206255	-0.23147	-0.368788																	31.16	0.006822	0.009764
		0.187519	-0.231316	-0.368638																	31.19	0.00681	0.009873
		0.0538961	-0.23097	-0.368608																	31.22	0.006796	0.009989
		-0.0953055	-0.230147	-0.368605																	31.25	0.0068	0.010081
		-0.464256	-0.229176	-0.36832																	31.28	0.006809	0.01015
		0.185543	-0.229093	-0.368295																	31.31	0.006814	0.010263
		0.0289342	-0.229034	-0.368101																	31.34	0.006818	0.010362
		0.176763	-0.229028	-0.368084																	31.37	0.006824	0.010476
		0.0776027	-0.228887	-0.367791																	31.4	0.006831	0.010569
		0.0113107	-0.228741	-0.367642																	31.43	0.006841	0.010681
		-0.327807	-0.228642	-0.36756																	31.46	0.006838	0.01076
		-0.164441	-0.228428	-0.367503																	31.49	0.006835	0.010875
		-0.107947	-0.2283	-0.36725																	31.52	0.006833	0.010995
		-0.403862	-0.228252	-0.367176																	31.55	0.006835	0.011089
		-0.310124	-0.228251	-0.366538																	31.58	0.006831	0.011193
		0.0889079	-0.228196	-0.366524																	31.61	0.006827	0.011298
		0.293871	-0.228177	-0.366276																	31.64	0.006825	0.011374
		0.302933	-0.228078	-0.366179																	31.67	0.006824	0.011476
		-0.0842484	-0.227906	-0.366155																	31.7	0.00684	0.011582
		-0.298085	-0.227861	-0.366105																	31.73	0.00686	0.011687
		-0.365873	-0.227164	-0.365885																	31.76	0.006871	0.011786
		-0.36681	-0.227128	-0.365873																	31.79	0.006874	0.011886
		-0.469461	-0.227049	-0.365811																	31.82	0.006877	0.011954
		-0.41927	-0.22649	-0.365804																	31.85	0.006882	0.012026
		-0.392734	-0.226362	-0.365632																	31.88	0.006895	0.012117
		-0.134529	-0.226203	-0.365545																	31.91	0.006906	0.012201
		0.0490445	-0.22546	-0.36544																	31.94	0.006919	0.012293
		0.062944	-0.225144	-0.365414																	31.97	0.006946	0.012375
		-0.393624	-0.225062	-0.365113																	32	0.006968	0.012436
		-0.0849648	-0.224949	-0.365044																	32.03	0.006992	0.012499
		-0.240833	-0.224683	-0.364638																	32.06	0.007012	0.012565
		0.382956	-0.224571	-0.364444																	32.09	0.007032	0.012635
		-0.181505	-0.224474	-0.364338																	32.12	0.007059	0.012691
		-0.493377	-0.224411	-0.364286																	32.15	0.007085	0.012745
		-0.27986	-0.224158	-0.363932																	32.18	0.007115	0.0128
		0.152658	-0.223756	-0.363268																	32.21	0.00714	0.012848
		-0.386504	-0.22368	-0.362844																	32.24	0.007168	0.012924
		-0.216914	-0.223349	-0.362518																	32.27	0.007194	0.012977
		0.090222	-0.222727	-0.362516																	32.31	0.007233	0.013001
		-0.133681	-0.222663	-0.362497																	32.33	0.007292	0.013034
		-0.210177	-0.222644	-0.362436																	32.36	0.007328	0.013069
		-0.20553	-0.222601	-0.3621																	32.39	0.007366	0.013103
		-0.306067	-0.222312	-0.362054																	32.42	0.007397	0.013141
		0.318398	-0.222141	-0.361915																	32.45	0.007431	0.013166
		0.0053906	-0.221763	-0.361503																	32.48	0.007476	0.013194
		-0.394902	-0.221488	-0.361005																	32.51	0.007513	0.013212
		-0.130844	-0.220984	-0.360882																	32.54	0.007549	0.013242
		-0.0236005	-0.220906	-0.360788																	32.57	0.00758	0.013263
		-0.0788783	-0.220589	-0.360702																	32.6	0.00764	0.013287
		0.311381	-0.220295	-0.360619																	32.63	0.007694	0.013297
		-0.537637	-0.220241	-0.360415																	32.66	0.007741	0.013306
		-0.364806	-0.219742	-0.360384																	32.69	0.007802	0.013331
		-0.416833	-0.219579	-0.360339																	32.72	0.007849	0.013349
		-0.435872	-0.21941	-0.360237																	32.75	0.007908	0.013363
		-0.47	-0.219235	-0.360211																	32.78	0.007963	0.013368
		-0.5862	-0.218892	-0.360135																	32.81	0.008016	0.013365
		-0.584871	-0.218645	-0.359768																	32.84	0.008074	0.013379
		-0.300911	-0.218617	-0.359301																	32.87	0.008126	0.013398
		-0.584656	-0.218586	-0.359104																	32.9	0.008197	0.013419
		0.0030562	-0.218472	-0.359016																	32.93	0.008244	0.013412
		0.0151561	-0.218205	-0.358955																	32.96	0.008285	0.01341
		0.0181766	-0.217905	-0.358923																	32.99	0.008341	0.01342
		-0.0023556	-0.217575	-0.358789																	33.02	0.008392	0.013423
		0.0228446	-0.217338	-0.358593																	33.05	0.008456	0.013409
		-0.0946668	-0.217259	-0.358468																	33.08	0.008513	0.013393
		-0.271901	-0.217076	-0.358464																	33.11	0.008565	0.013383
		0.11773	-0.216926	-0.358341																	33.14	0.008626	0.013377
		-0.0951434	-0.216914	-0.358149																	33.17	0.008679	0.013384
		0.0924427	-0.21688	-0.357699																	33.2	0.008733	0.013374
		0.0803188	-0.216746	-0.357472																	33.23	0.008784	0.013349
		0.154326	-0.216714	-0.357436																	33.26	0.008852	0.013329
		-0.263118	-0.216596	-0.35723																	33.29	0.008903	0.013319
		-0.130638	-0.216351	-0.357171																	33.32	0.008954	0.013306
		-0.227213	-0.216086	-0.35711																	33.35	0.009004	0.013296
		0.155217	-0.21607	-0.35697																	33.38	0.00906	0.013284
		-0.275805	-0.215854	-0.35694																	33.41	0.009131	0.013264
		-0.219295	-0.215847	-0.356745																	33.44	0.009169	0.013254
		-0.157438	-0.215533	-0.356534																	33.47	0.009213	0.01325
		-0.217259	-0.21537	-0.356261																	33.5	0.009279	0.013246
		0.0491898	-0.215318	-0.356252																	33.53	0.009333	0.013231
		0.224376	-0.215147	-0.35625																	33.56	0.009402	0.013216
		0.12599	-0.215058	-0.355928																	33.59	0.009448	0.013201
		0.112624	-0.214706	-0.355769																	33.62	0.009489	0.013201
		0.220436	-0.214704	-0.355739																	33.65	0.009542	0.013191
		0.108687	-0.214643	-0.355735																	33.68	0.009582	0.013165
		-0.274844	-0.214388	-0.35559																	33.71	0.009621	0.013143
		-0.15251	-0.214386	-0.355529																	33.74	0.009665	0.013138
		-0.0864106	-0.21408	-0.355239																	33.77	0.009689	0.013118
		-0.0923609	-0.213704	-0.355117																	33.8	0.009726	0.013104
		0.0240837	-0.213141	-0.355088																	33.83	0.009762	0.013092
		-0.0886	-0.21303	-0.354752																	33.86	0.009798	0.013061
		-0.379746	-0.212688	-0.354738																	33.89	0.009827	0.013056
		-0.0702523	-0.212338	-0.354583																	33.92	0.009858	0.013041
		-0.160301	-0.212245	-0.354166																	33.95	0.009883	0.013024
		-0.0747144	-0.21175	-0.353751																	33.98	0.009914	0.013006
		0.0798758	-0.211733	-0.353735																	34.01	0.009952	0.012965
		-0.200316	-0.211697	-0.353687																	34.04	0.009987	0.012927
		-0.262075	-0.21168	-0.353264																	34.07	0.010012	0.01288
		-0.037524	-0.211363	-0.353187																	34.1	0.010034	0.01286
		0.0862948	-0.210962	-0.352933																	34.13	0.010053	0.012829
		-0.0357767	-0.210957	-0.352634																	34.16	0.010086	0.012787
		0.0623157	-0.210923	-0.352599																	34.19	0.010112	0.01275
		0.587691	-0.210836	-0.352325																	34.22	0.010128	0.012724
		-0.0312504	-0.210833	-0.352315																	34.25	0.010148	0.01271
		-0.416161	-0.210733	-0.352023																	34.28	0.010168	0.012682
		-0.382449	-0.210644	-0.35194																	34.31	0.010196	0.012648
		-0.316003	-0.210489	-0.351461																	34.34	0.010223	0.012628
		-0.028914	-0.210429	-0.35134																	34.37	0.010234	0.012614
		0.0320662	-0.210177	-0.350967																	34.4	0.01025	0.0126
		-0.164722	-0.209456	-0.350863																	34.43	0.01026	0.012576
		0.0847963	-0.209238	-0.350862																	34.46	0.010269	0.012556
		-0.0188286	-0.20884	-0.350713																	34.49	0.010287	0.012528
		-0.634962	-0.208753	-0.350701																	34.52	0.010289	0.012507
		0.18052	-0.208703	-0.35058																	34.55	0.010299	0.012499
		-0.0594795	-0.208518	-0.350565																	34.58	0.010315	0.012492
		0.283552	-0.208252	-0.350548																	34.61	0.010321	0.012483
		-0.390302	-0.208223	-0.35043																	34.64	0.010329	0.012474
		-0.0528262	-0.20812	-0.35038																	34.67	0.010328	0.012471
		-0.142951	-0.208031	-0.350168																	34.7	0.010321	0.012465
		0.218854	-0.207987	-0.349783																	34.73	0.010331	0.012446
		-0.360788	-0.207939	-0.349611																	34.76	0.010356	0.012419
		0.211008	-0.207386	-0.349445																	34.8	0.010369	0.012387
		-0.0652452	-0.207288	-0.349346																	34.82	0.010369	0.012351
		0.217693	-0.207101	-0.349307																	34.85	0.010364	0.012335
		-0.2813	-0.206994	-0.349291																	34.88	0.010364	0.012301
		-0.18657	-0.206827	-0.349216																	34.91	0.010375	0.012268
		0.222989	-0.206595	-0.349118																	34.94	0.010378	0.012235
		0.251972	-0.206445	-0.348927																	34.97	0.010383	0.012211
		-0.494483	-0.206397	-0.348923																	35	0.010374	0.012199
		-0.491195	-0.206018	-0.348646																	35.03	0.010368	0.012188
		-0.459532	-0.205805	-0.348318																	35.06	0.01037	0.012174
		0.35833	-0.205606	-0.348305																	35.09	0.010373	0.012148
		-0.489766	-0.20558	-0.348132																	35.12	0.010378	0.012136
		0.0735976	-0.20553	-0.348088																	35.15	0.010366	0.012134
		-0.256227	-0.204217	-0.348041																	35.18	0.010367	0.012125
		0.273015	-0.203928	-0.348006																	35.21	0.010367	0.012108
		0.0479459	-0.203793	-0.347687																	35.24	0.010376	0.012098
		0.143548	-0.203673	-0.347643																	35.27	0.010365	0.012081
		0.195124	-0.203564	-0.347451																	35.3	0.010345	0.012065
		-0.412001	-0.203469	-0.347414																	35.33	0.010336	0.012054
		-0.0810729	-0.203453	-0.347372																	35.36	0.010332	0.012041
		0.10563	-0.203424	-0.347316																	35.39	0.010331	0.012023
		-0.547195	-0.202999	-0.347231																	35.42	0.010329	0.012009
		-0.457725	-0.202862	-0.347165																	35.45	0.010334	0.011999
		0.00857501	-0.202766	-0.347083																	35.48	0.010325	0.012001
		-0.455209	-0.202452	-0.34679																	35.51	0.01032	0.011989
		0.220053	-0.202379	-0.346773																	35.54	0.010325	0.011986
		-0.455482	-0.202325	-0.346749																	35.57	0.010334	0.011988
		0.0921844	-0.202037	-0.346615																	35.6	0.010324	0.011985
		0.0915714	-0.201959	-0.34655																	35.63	0.010306	0.01198
		-0.454694	-0.201878	-0.346472																	35.66	0.010296	0.011987
		0.0917054	-0.201648	-0.346394																	35.69	0.010287	0.011974
		-0.40285	-0.201458	-0.34628																	35.72	0.010299	0.011967
		0.0932854	-0.201258	-0.346218																	35.75	0.010308	0.011982
		-0.42931	-0.201126	-0.346184																	35.78	0.010314	0.01199
		0.161633	-0.200724	-0.346176																	35.81	0.010311	0.011991
		-0.299774	-0.200708	-0.346097																	35.84	0.01033	0.011981
		0.0589118	-0.200597	-0.345932																	35.87	0.010337	0.011985
		0.3586	-0.200504	-0.345781																	35.9	0.01033	0.012004
		0.0959045	-0.200316	-0.345641																	35.93	0.010321	0.012023
		0.320226	-0.200187	-0.345326																	35.96	0.010317	0.012035
		0.0382202	-0.200158	-0.345159																	35.99	0.010322	0.012031
		-0.260051	-0.199865	-0.344875																	36.02	0.010314	0.012016
		0.128036	-0.19971	-0.344538																	36.05	0.010303	0.012025
		0.0267694	-0.199585	-0.344509																	36.08	0.010288	0.012034
		-0.149468	-0.199481	-0.34444																	36.12	0.010277	0.012036
		0.202534	-0.199394	-0.344418																	36.14	0.01028	0.012029
		0.0177798	-0.199191	-0.344251																	36.17	0.010282	0.012021
		-0.375295	-0.198847	-0.343923																	36.2	0.010285	0.012008
		-0.0326506	-0.198694	-0.343864																	36.23	0.01027	0.012002
		0.100604	-0.197929	-0.343738																	36.26	0.010248	0.012
		0.0291718	-0.197839	-0.343522																	36.29	0.010241	0.012004
		-0.0342059	-0.197838	-0.343503																	36.32	0.010244	0.012004
		0.124738	-0.19752	-0.343481																	36.35	0.010235	0.01201
		-0.108515	-0.197515	-0.343463																	36.38	0.010235	0.012029
		0.259626	-0.1972	-0.343385																	36.41	0.010226	0.012056
		0.112104	-0.197033	-0.343384																	36.44	0.010227	0.012075
		0.028514	-0.196994	-0.343322																	36.47	0.01023	0.012091
		-0.104631	-0.196057	-0.343321																	36.5	0.010213	0.012133
		0.113086	-0.19597	-0.343217																	36.53	0.010204	0.012174
		0.0978201	-0.195634	-0.343122																	36.53	0.010201	0.012182
		-0.299963	-0.195454	-0.343108																	36.56	0.010188	0.012214
		0.342055	-0.195431	-0.343059																	36.59	0.010168	0.012259
		0.190148	-0.195391	-0.343056																	36.62	0.010155	0.012293
		0.0470627	-0.195019	-0.343003																	36.65	0.010142	0.01236
		0.342902	-0.194981	-0.342865																	36.68	0.010127	0.012429
		-0.443388	-0.19497	-0.342766																	36.71	0.01011	0.012511
		-0.259175	-0.194965	-0.342674																	36.74	0.010096	0.012572
		-0.313644	-0.194822	-0.342672																	36.77	0.010096	0.012651
		-0.398406	-0.194666	-0.342618																	36.8	0.010096	0.012728
		-0.435193	-0.194558	-0.342469																	36.83	0.010083	0.012819
		-0.252255	-0.194489	-0.342436																	36.86	0.010044	0.012931
		0.0639025	-0.194485	-0.34203																	36.89	0.010029	0.013022
		0.025177	-0.194255	-0.34197																	36.92	0.01001	0.013119
		-0.136808	-0.194036	-0.341795																	36.95	0.010002	0.013214
		-0.13211	-0.193901	-0.341736																	36.98	0.009987	0.013319
		-0.314995	-0.193736	-0.341644																	37.01	0.009972	0.013444
		0.0494054	-0.193707	-0.341575																	37.04	0.009961	0.013548
		0.126857	-0.193696	-0.341329																	37.07	0.009955	0.013663
		-0.0600768	-0.193601	-0.341275																	37.1	0.009947	0.013744
		0.412962	-0.193242	-0.341242																	37.13	0.009925	0.013849
		-0.296008	-0.193239	-0.340934																	37.16	0.009904	0.013987
		-0.0613699	-0.1922	-0.340848																	37.19	0.009886	0.014108
		0.273591	-0.192168	-0.3407																	37.22	0.009872	0.014238
		0.12688	-0.191939	-0.340676																	37.25	0.009863	0.014346
		0.0997603	-0.191806	-0.340489																	37.28	0.009843	0.014493
		-0.340062	-0.191728	-0.340326																	37.31	0.009828	0.014598
		-0.189364	-0.191662	-0.340206																	37.34	0.009815	0.014733
		0.338622	-0.191373	-0.340062																	37.37	0.009788	0.014879
		0.329256	-0.191339	-0.339958																	37.4	0.009775	0.014998
		0.115539	-0.191309	-0.3399																	37.44	0.009761	0.015152
		-0.0338266	-0.191276	-0.339838																	37.46	0.009746	0.015295
		0.164867	-0.191171	-0.339777																	37.49	0.009728	0.015402
		-0.030767	-0.19054	-0.339769																	37.52	0.009711	0.015539
		0.125063	-0.190158	-0.339737																	37.55	0.009711	0.015649
		-0.261836	-0.18959	-0.339664																	37.58	0.009704	0.015814
		0.0945457	-0.189291	-0.339357																	37.61	0.009692	0.015968
		0.263708	-0.189211	-0.339282																	37.64	0.009685	0.016102
		0.349587	-0.189165	-0.339178																	37.67	0.009681	0.016221
		-0.0345657	-0.188926	-0.339115																	37.7	0.009686	0.016337
		-0.0401433	-0.188891	-0.339106																	37.73	0.009671	0.016478
		0.235504	-0.188667	-0.338857																	37.76	0.009651	0.016612
		0.222403	-0.18863	-0.338842																	37.79	0.009646	0.016734
		-0.264	-0.188317	-0.338826																	37.82	0.00964	0.016869
		0.114092	-0.188184	-0.338541																	37.85	0.009645	0.016983
		-0.118345	-0.187684	-0.338535																	37.88	0.009657	0.01708
		-0.31135	-0.187086	-0.33832																	37.91	0.009653	0.017184
		-0.489581	-0.186772	-0.338306																	37.94	0.009654	0.017306
		0.0979888	-0.186712	-0.338275																	37.97	0.009668	0.017402
		-0.446211	-0.186687	-0.338267																	38	0.00968	0.017484
		-0.0254333	-0.186566	-0.337978																	38.03	0.009693	0.017583
		-0.117222	-0.186407	-0.337843																	38.06	0.009707	0.017651
		-0.092509	-0.186256	-0.337819																	38.09	0.009717	0.017749
		-0.163702	-0.186224	-0.33753																	38.12	0.009737	0.017821
		0.111484	-0.186134	-0.33748																	38.15	0.00976	0.017886
		0.0290016	-0.186007	-0.337318																	38.18	0.009785	0.017948
		0.102097	-0.185906	-0.337045																	38.21	0.00981	0.018002
		0.0241743	-0.185901	-0.336904																	38.24	0.009826	0.018058
		-0.0150367	-0.185705	-0.336847																	38.27	0.009846	0.018107
		0.18429	-0.185494	-0.336639																	38.3	0.009902	0.018146
		-0.010527	-0.185459	-0.336259																	38.33	0.00994	0.01819
		0.192663	-0.185447	-0.336171																	38.36	0.00998	0.018236
		0.410447	-0.185307	-0.335949																	38.39	0.010016	0.018275
		-0.0011256	-0.185279	-0.335833																	38.42	0.010073	0.018296
		-0.0047323	-0.185142	-0.335804																	38.45	0.01014	0.018301
		0.00242234	-0.185017	-0.335507																	38.48	0.010207	0.018315
		-0.35723	-0.184917	-0.335481																	38.51	0.01028	0.018336
		0.0939131	-0.184336	-0.335338																	38.54	0.010317	0.018361
		0.687147	-0.184293	-0.335291																	38.57	0.010391	0.018376
		0.689109	-0.184209	-0.335261																	38.6	0.010469	0.01837
		-0.360339	-0.184133	-0.33523																	38.63	0.010558	0.018369
		0.692701	-0.184003	-0.33516																	38.66	0.010661	0.018364
		0.182751	-0.183978	-0.335066																	38.69	0.010738	0.018358
		-0.294518	-0.183703	-0.334987																	38.72	0.010818	0.018351
		-0.286892	-0.183701	-0.334825																	38.76	0.010911	0.018333
		-0.269539	-0.183558	-0.334798																	38.78	0.011009	0.018317
		-0.345641	-0.183483	-0.334741																	38.81	0.011125	0.018309
		-0.0526577	-0.183464	-0.33454																	38.84	0.011219	0.018295
		-0.344251	-0.183451	-0.334463																	38.87	0.011325	0.018281
		-0.0479249	-0.183097	-0.334373																	38.9	0.011415	0.018259
		-0.342766	-0.182666	-0.334343																	38.93	0.011531	0.018227
		-0.232981	-0.18263	-0.333967																	38.96	0.011652	0.018169
		0.398785	-0.182105	-0.333914																	38.99	0.01176	0.018134
		-0.330479	-0.181713	-0.333793																	39.02	0.01189	0.018105
		0.31463	-0.181662	-0.333589																	39.05	0.011998	0.018046
		0.318318	-0.181512	-0.333523																	39.08	0.012123	0.017997
		0.321494	-0.181067	-0.3334																	39.11	0.012223	0.017938
		-0.252062	-0.180919	-0.333399																	39.14	0.012339	0.017903
		0.23363	-0.18084	-0.333268																	39.17	0.012459	0.017865
		0.325185	-0.180788	-0.333228																	39.2	0.012567	0.017815
		-0.0432118	-0.180782	-0.333192																	39.23	0.012709	0.017745
		-0.169402	-0.179997	-0.333154																	39.26	0.012828	0.017671
		0.213585	-0.179963	-0.33313																	39.29	0.012919	0.017612
		0.094586	-0.179805	-0.332834																	39.32	0.013042	0.017559
		-0.0068364	-0.179684	-0.332776																	39.35	0.013149	0.017472
		-0.181175	-0.179655	-0.332595																	39.38	0.013275	0.0174
		-0.426467	-0.179607	-0.33254																	39.41	0.013361	0.017323
		-0.288892	-0.179541	-0.33241																	39.44	0.01346	0.017251
		0.309446	-0.179499	-0.332383																	39.47	0.01354	0.017178
		-0.585283	-0.179207	-0.332347																	39.5	0.013629	0.017085
		0.100391	-0.179186	-0.331843																	39.53	0.013738	0.017008
		0.134778	-0.179096	-0.331835																	39.56	0.013837	0.016926
		-0.574837	-0.178969	-0.331806																	39.59	0.013942	0.01685
		-0.575083	-0.178683	-0.331768																	39.62	0.014022	0.016768
		-0.583581	-0.178586	-0.331733																	39.65	0.014103	0.016691
		0.0823269	-0.177509	-0.331565																	39.68	0.014185	0.016606
		-0.565831	-0.177136	-0.331466																	39.71	0.014266	0.016492
		-0.753446	-0.177131	-0.331438																	39.74	0.014353	0.016409
		0.385208	-0.176992	-0.331305																	39.77	0.014404	0.016329
		-0.430301	-0.176506	-0.331207																	39.8	0.014457	0.016242
		-0.560464	-0.176158	-0.331005																	39.83	0.014533	0.016152
		0.0751633	-0.176136	-0.330967																	39.86	0.014582	0.016042
		-0.417157	-0.175844	-0.330956																	39.89	0.014642	0.015948
		-0.319403	-0.175783	-0.330946																	39.92	0.014693	0.015847
		-0.922581	-0.175638	-0.33053																	39.95	0.014744	0.015783
		-0.408174	-0.175241	-0.330479																	39.98	0.014793	0.015687
		-0.233071	-0.175227	-0.330442																	40.01	0.014837	0.015588
		0.509963	-0.174668	-0.330403																	40.04	0.014885	0.015509
		0.0825474	-0.174445	-0.330327																	40.08	0.014924	0.015408
		0.100181	-0.174229	-0.330192																	40.1	0.014959	0.015316
		0.0937468	-0.17411	-0.330136																	40.13	0.014992	0.015238
		-0.603478	-0.174082	-0.329921																	40.16	0.015032	0.015137
		0.100042	-0.173873	-0.329872																	40.19	0.015073	0.015049
		0.31608	-0.17386	-0.329803																	40.22	0.015094	0.014943
		-0.462483	-0.173832	-0.329737																	40.25	0.01512	0.014862
		0.134149	-0.173781	-0.329484																	40.28	0.015144	0.014753
		-0.0027985	-0.173571	-0.329387																	40.31	0.015173	0.014673
		0.0812471	-0.173541	-0.329163																	40.34	0.015205	0.014575
		0.386002	-0.173335	-0.329122																	40.37	0.015206	0.014455
		-0.248792	-0.17329	-0.32904																	40.4	0.015206	0.014363
		-0.167099	-0.173074	-0.328978																	40.43	0.015215	0.014256
		0.131216	-0.17292	-0.328941																	40.46	0.015222	0.014146
		0.405663	-0.1728	-0.32888																	40.49	0.015219	0.014042
		0.054621	-0.172693	-0.328764																	40.52	0.01522	0.013942
		0.440379	-0.172582	-0.328691																	40.55	0.015218	0.013858
		0.00282367	-0.172059	-0.32851																	40.58	0.015213	0.013749
		0.435964	-0.171409	-0.328205																	40.61	0.015217	0.013651
		-0.136422	-0.171013	-0.328117																	40.64	0.015233	0.013551
		-0.0513195	-0.170853	-0.328066																	40.67	0.015234	0.013432
		0.233139	-0.170819	-0.327929																	40.7	0.015223	0.013354
		0.214087	-0.170761	-0.327912																	40.73	0.015213	0.013236
		0.0729798	-0.170421	-0.327807																	40.76	0.015207	0.013121
		0.0157283	-0.170288	-0.327793																	40.79	0.015207	0.012997
		0.0980843	-0.170217	-0.327619																	40.82	0.015186	0.0129
		0.0665736	-0.170108	-0.327523																	40.85	0.015156	0.012807
		-0.325902	-0.170077	-0.327379																	40.88	0.015135	0.012715
		0.0828138	-0.169839	-0.326869																	40.91	0.015125	0.012623
		-0.324909	-0.169752	-0.326597																	40.94	0.015113	0.012523
		0.616309	-0.169522	-0.326585																	40.97	0.015097	0.012437
		1.08216	-0.169403	-0.326577																	41	0.015066	0.012348
		-0.153688	-0.169229	-0.326409																	41.03	0.01504	0.01224
		-0.300536	-0.169199	-0.326296																	41.06	0.01502	0.012141
		0.791055	-0.168787	-0.326132																	41.09	0.014999	0.012036
		-0.491029	-0.168704	-0.32613																	41.12	0.014978	0.011953
		0.0792258	-0.168273	-0.326086																	41.15	0.014935	0.011887
		0.0119994	-0.168246	-0.32604																	41.18	0.014904	0.011803
		-0.218057	-0.168167	-0.32601																	41.21	0.014868	0.01172
		0.325163	-0.168017	-0.325902																	41.24	0.014853	0.011615
		0.0888602	-0.167978	-0.325899																	41.27	0.014823	0.011545
		-0.264667	-0.167852	-0.325858																	41.3	0.014785	0.011473
		-0.234587	-0.167566	-0.325835																	41.33	0.014747	0.011382
		-0.145226	-0.167415	-0.325526																	41.36	0.014695	0.011302
		0.472222	-0.167391	-0.325492																	41.39	0.014658	0.011209
		-0.427763	-0.167335	-0.325392																	41.42	0.014605	0.01113
		-0.0769947	-0.167277	-0.325146																	41.45	0.01456	0.011052
		-0.199442	-0.16718	-0.325073																	41.48	0.014513	0.01098
		-0.422731	-0.167013	-0.325018																	41.51	0.014467	0.010907
		0.057636	-0.166827	-0.324909																	41.54	0.01443	0.010806
		-0.0476349	-0.166724	-0.324901																	41.57	0.014385	0.010725
		-0.417339	-0.166722	-0.324676																	41.6	0.014337	0.010642
		0.102744	-0.166653	-0.324462																	41.63	0.014286	0.010581
		0.25017	-0.166458	-0.324444																	41.66	0.014242	0.010506
		0.11168	-0.166151	-0.324276																	41.69	0.014199	0.010412
		0.113305	-0.165989	-0.324159																	41.72	0.014133	0.010347
		0.116795	-0.165913	-0.324113																	41.75	0.014083	0.010262
		0.182059	-0.165436	-0.323986																	41.78	0.014022	0.010201
		-0.214704	-0.165432	-0.323848																	41.81	0.013955	0.010132
		0.00438106	-0.16533	-0.323817																	41.84	0.013893	0.010061
		0.526149	-0.165104	-0.323137																	41.87	0.013826	0.009995
		-0.271614	-0.165032	-0.323095																	41.9	0.013763	0.009921
		-0.340676	-0.165025	-0.322908																	41.93	0.013683	0.009862
		0.0613789	-0.164918	-0.32289																	41.96	0.013615	0.009782
		-0.288911	-0.164866	-0.322786																	41.99	0.013568	0.009726
		0.101084	-0.164723	-0.322599																	42.02	0.013489	0.009667
		-0.163994	-0.164722	-0.322445																	42.05	0.013417	0.009596
		0.106366	-0.164544	-0.322297																	42.08	0.013334	0.00954
		-0.169629	-0.164519	-0.322218																	42.11	0.013278	0.009472
		0.113086	-0.164441	-0.322084																	42.14	0.013215	0.009412
		-0.189876	-0.164417	-0.321994																	42.17	0.013141	0.009347
		0.186058	-0.164158	-0.321867																	42.2	0.013066	0.009285
		-0.191015	-0.164133	-0.321736																	42.23	0.012963	0.009235
		-0.399911	-0.164113	-0.321723																	42.26	0.012888	0.009165
		-0.0397486	-0.164046	-0.321621																	42.29	0.012811	0.0091
		0.207123	-0.164033	-0.321471																	42.32	0.012744	0.009035
		0.185068	-0.164	-0.321436																	42.35	0.012668	0.00897
		-0.332834	-0.163989	-0.32141																	42.38	0.01257	0.008932
		-0.368101	-0.163881	-0.320935																	42.41	0.012488	0.008873
		0.594701	-0.163702	-0.320841																	42.44	0.012411	0.008815
		-0.428749	-0.16365	-0.320727																	42.47	0.012331	0.008757
		0.0767923	-0.163371	-0.320689																	42.48	0.01232	0.008748
		0.218828	-0.163369	-0.320564																	42.5	0.012262	0.008698
		0.254506	-0.16318	-0.31999																	42.53	0.012154	0.008651
		-0.0297567	-0.162595	-0.319894																	42.56	0.012056	0.008599
		-0.267066	-0.162443	-0.319534																	42.59	0.011953	0.008557
		-0.505841	-0.162344	-0.319403																	42.62	0.011877	0.0085
		-0.0488787	-0.16218	-0.319272																	42.65	0.011803	0.00845
		0.257942	-0.162141	-0.319261																	42.68	0.011728	0.008409
		0.311989	-0.161609	-0.319202																	42.71	0.011635	0.008367
		-0.312619	-0.161588	-0.319088																	42.74	0.011539	0.008329
		-0.271732	-0.161562	-0.319061																	42.77	0.011455	0.00829
		-0.0608177	-0.161545	-0.318899																	42.8	0.011376	0.008247
		-0.147281	-0.161302	-0.31882																	42.83	0.011276	0.008221
		0.19739	-0.160961	-0.318705																	42.86	0.011201	0.008189
		-0.542348	-0.160853	-0.318559																	42.89	0.011103	0.008155
		0.199404	-0.160812	-0.31807																	42.92	0.011018	0.008101
		-0.0183415	-0.160681	-0.318058																	42.95	0.01093	0.008055
		0.085055	-0.160503	-0.318047																	42.98	0.010815	0.008019
		-0.345507	-0.160475	-0.31791																	43.01	0.010709	0.007992
		-0.0439017	-0.160133	-0.317835																	43.04	0.010604	0.007965
		0.382211	-0.160005	-0.317686																	43.07	0.010541	0.007915
		-0.0771688	-0.15998	-0.317613																	43.1	0.010457	0.007885
		-0.335949	-0.159668	-0.317478																	43.13	0.010372	0.007845
		-0.424082	-0.159484	-0.317314																	43.16	0.010285	0.00783
		-0.333793	-0.159457	-0.31729																	43.19	0.010183	0.007813
		-0.326086	-0.159272	-0.316968																	43.22	0.010098	0.007772
		0.0082442	-0.159233	-0.316905																	43.25	0.010016	0.00774
		-0.145022	-0.15905	-0.316801																	43.28	0.00993	0.007709
		0.0103618	-0.158777	-0.316657																	43.31	0.009838	0.007682
		-0.318899	-0.1584	-0.31642																	43.34	0.009731	0.007655
		0.279206	-0.158204	-0.316364																	43.37	0.009653	0.007616
		0.0743214	-0.158115	-0.316041																	43.4	0.009561	0.007594
		-0.344509	-0.157854	-0.316004																	43.43	0.009497	0.00756
		-0.255654	-0.157694	-0.316003																	43.46	0.00941	0.007534
		0.229184	-0.157476	-0.315846																	43.49	0.009306	0.007501
		0.462747	-0.157439	-0.31577																	43.52	0.00923	0.007479
		-0.509584	-0.157395	-0.315657																	43.55	0.009151	0.00744
		-0.477781	-0.157288	-0.315319																	43.58	0.009087	0.007421
		0.13463	-0.157261	-0.315311																	43.61	0.009005	0.007407
		-0.502311	-0.156727	-0.315186																	43.64	0.008919	0.007384
		-0.24347	-0.156403	-0.315149																	43.67	0.008849	0.007353
		-0.477846	-0.156239	-0.314995																	43.7	0.00878	0.007331
		-1.51357	-0.155929	-0.314941																	43.73	0.00871	0.007311
		-0.497882	-0.155749	-0.314796																	43.76	0.008633	0.007289
		-0.0691506	-0.155609	-0.314536																	43.79	0.008559	0.007278
		-0.338842	-0.155575	-0.314529																	43.82	0.008504	0.007251
		0.0732851	-0.155354	-0.31432																	43.85	0.008434	0.007213
		-0.482172	-0.155217	-0.314273																	43.88	0.008386	0.007186
		-0.0964424	-0.155138	-0.314003																	43.91	0.00831	0.00718
		-0.322585	-0.155055	-0.313849																	43.94	0.008242	0.007161
		-0.616911	-0.154881	-0.313746																	43.97	0.008186	0.007137
		-0.282161	-0.154493	-0.313619																	44	0.008141	0.007107
		0.147313	-0.154419	-0.313362																	44.03	0.008087	0.007073
		-0.616076	-0.154171	-0.31333																	44.06	0.008017	0.007053
		0.454155	-0.15415	-0.313105																	44.09	0.007958	0.007044
		-0.827115	-0.153752	-0.312911																	44.12	0.007904	0.007017
		0.060564	-0.153688	-0.312853																	44.15	0.007848	0.006989
		-0.283868	-0.15368	-0.312779																	44.18	0.007817	0.00696
		-0.280914	-0.153374	-0.312572																	44.21	0.007764	0.006931
		0.0283414	-0.153203	-0.312544																	44.24	0.007709	0.006915
		0.0288709	-0.15301	-0.312059																	44.27	0.007662	0.006904
		-0.53858	-0.152868	-0.311874																	44.3	0.00762	0.006873
		-0.536974	-0.152862	-0.31184																	44.33	0.007603	0.006852
		0.0311221	-0.152756	-0.311815																	44.36	0.007564	0.006844
		-0.206445	-0.15251	-0.311726																	44.39	0.007518	0.00683
		-0.287875	-0.152465	-0.311512																	44.42	0.00747	0.006818
		0.361421	-0.152333	-0.31148																	44.45	0.007432	0.006792
		0.35726	-0.152283	-0.311433																	44.48	0.007404	0.00676
		0.35803	-0.152223	-0.311406																	44.51	0.007369	0.006749
		-0.44583	-0.152114	-0.311253																	44.54	0.007325	0.006751
		-0.407158	-0.151929	-0.311062																	44.57	0.007293	0.006738
		-0.0097105	-0.151811	-0.31106																	44.6	0.007274	0.006716
		-0.116898	-0.151592	-0.310957																	44.63	0.007257	0.006699
		-0.0058713	-0.151577	-0.310867																	44.66	0.007216	0.006693
		-0.183097	-0.151291	-0.310796																	44.69	0.007189	0.006699
		-0.595244	-0.151052	-0.310706																	44.72	0.007151	0.006692
		-0.400329	-0.151034	-0.310607																	44.75	0.007122	0.006668
		0.257644	-0.150814	-0.31058																	44.78	0.00711	0.006659
		-0.268011	-0.150743	-0.310501																	44.81	0.007078	0.006651
		-0.278709	-0.150281	-0.310408																	44.84	0.007042	0.006643
		-0.0465613	-0.150038	-0.310356																	44.87	0.00701	0.006644
		-0.0496602	-0.150033	-0.310252																	44.9	0.006984	0.006627
		-0.152269	-0.149982	-0.31019																	44.93	0.00696	0.006619
		0.218229	-0.149569	-0.310124																	44.96	0.00694	0.006601
		0.104219	-0.149208	-0.309954																	44.99	0.006921	0.006603
		-0.0531648	-0.149118	-0.309727																	45.02	0.006893	0.0066
		0.169181	-0.149071	-0.309312																	45.05	0.006885	0.006592
		0.0212461	-0.148316	-0.309301																	45.08	0.006871	0.006591
		-0.311106	-0.147889	-0.30911																	45.11	0.006853	0.006585
		-0.0154369	-0.147807	-0.30894																	45.14	0.006836	0.006579
		-0.247178	-0.147805	-0.308827																	45.17	0.006817	0.006577
		-0.0771614	-0.147738	-0.3087																	45.2	0.006803	0.006565
		-0.400978	-0.147675	-0.308618																	45.23	0.00679	0.006552
		-0.174746	-0.147425	-0.308381																	45.26	0.006782	0.006535
		0.246652	-0.147281	-0.308333																	45.29	0.006769	0.006529
		0.100239	-0.147167	-0.307868																	45.32	0.006747	0.006544
		0.00259071	-0.147159	-0.307545																	45.35	0.006735	0.006532
		0.039065	-0.147128	-0.307384																	45.38	0.006731	0.006517
		-0.152333	-0.147098	-0.307368																	45.41	0.006724	0.006497
		-0.0410772	-0.14708	-0.307196																	45.44	0.006711	0.006498
		-0.682731	-0.146801	-0.307195																	45.47	0.006691	0.006496
		-0.0365733	-0.1468	-0.307164																	45.5	0.006673	0.006482
		0.0976659	-0.146776	-0.307115																	45.53	0.006667	0.006478
		0.169942	-0.146679	-0.307057																	45.56	0.006659	0.006478
		0.448732	-0.146529	-0.30704																	45.59	0.006654	0.006479
		-0.612328	-0.146439	-0.30699																	45.62	0.006642	0.00648
		-0.573429	-0.146239	-0.306699																	45.65	0.006631	0.006481
		0.0122918	-0.146148	-0.306528																	45.68	0.006617	0.006464
		-0.232743	-0.145912	-0.306355																	45.71	0.006604	0.006442
		-0.12678	-0.145731	-0.306343																	45.74	0.006597	0.006438
		0.27254	-0.145706	-0.306316																	45.77	0.006589	0.006435
		-0.109139	-0.145662	-0.306173																	45.8	0.006586	0.006439
		-0.179607	-0.14563	-0.306067																	45.83	0.00658	0.006432
		-0.346184	-0.145523	-0.306033																	45.86	0.006576	0.006423
		-0.170761	-0.145347	-0.305806																	45.89	0.006565	0.006423
		-0.0421099	-0.145226	-0.305557																	45.92	0.006548	0.006437
		-0.535713	-0.144795	-0.305463																	45.95	0.00654	0.00644
		0.249879	-0.144518	-0.305253																	45.98	0.006541	0.006435
		-0.529046	-0.144443	-0.305245																	46.01	0.006545	0.006419
		0.00648315	-0.144298	-0.305179																	46.04	0.006541	0.006408
		-0.298315	-0.144221	-0.305098																	46.07	0.006537	0.006401
		0.20329	-0.143563	-0.304852																	46.1	0.006525	0.006403
		-0.279881	-0.143244	-0.304803																	46.13	0.006527	0.006392
		0.183416	-0.143209	-0.304784																	46.16	0.006535	0.006379
		-0.24707	-0.143018	-0.304662																	46.19	0.006526	0.006376
		0.134887	-0.142951	-0.304659																	46.22	0.006512	0.006378
		0.130536	-0.142652	-0.304563																	46.25	0.006494	0.006373
		0.276127	-0.142532	-0.304546																	46.28	0.006486	0.006353
		0.0471149	-0.142514	-0.304301																	46.31	0.006491	0.006337
		0.177284	-0.142507	-0.304181																	46.34	0.00649	0.006328
		-0.416132	-0.141961	-0.304145																	46.37	0.006487	0.006335
		0.210365	-0.141893	-0.304048																	46.4	0.006476	0.006333
		0.315006	-0.14168	-0.30403																	46.43	0.006476	0.006337
		-0.0404189	-0.141368	-0.304008																	46.46	0.006485	0.006324
		-0.326409	-0.141286	-0.303982																	46.49	0.006489	0.006319
		0.228015	-0.141067	-0.30365																	46.52	0.006468	0.006331
		0.0560412	-0.140912	-0.303649																	46.55	0.006448	0.006338
		-0.434875	-0.14048	-0.303525																	46.58	0.006443	0.006317
		-0.435852	-0.140225	-0.303445																	46.61	0.006436	0.006299
		-0.0886075	-0.140129	-0.303389																	46.64	0.006437	0.006281
		-0.215847	-0.14006	-0.303283																	46.67	0.006436	0.006281
		0.234642	-0.139653	-0.303243																	46.7	0.006432	0.006298
		0.214808	-0.139625	-0.303092																	46.73	0.006424	0.006292
		0.443327	-0.139452	-0.303092																	46.76	0.006436	0.006282
		0.224873	-0.139401	-0.303065																	46.79	0.006442	0.006277
		0.072927	-0.139381	-0.302914																	46.82	0.00644	0.006286
		0.445739	-0.139091	-0.302901																	46.85	0.006437	0.006282
		0.410965	-0.139089	-0.302888																	46.88	0.006432	0.00628
		0.44869	-0.139061	-0.302838																	46.91	0.006423	0.006273
		0.273853	-0.13866	-0.302824																	46.94	0.006437	0.006257
		0.452357	-0.138625	-0.302473																	46.97	0.006438	0.00624
		0.0653692	-0.138574	-0.302444																	47	0.006433	0.006238
		-0.206842	-0.138526	-0.302405																	47.03	0.006428	0.006236
		0.194697	-0.137848	-0.302172																	47.06	0.006434	0.006227
		0.211034	-0.137733	-0.302084																	47.09	0.006433	0.006228
		-0.350101	-0.137651	-0.302042																	47.12	0.006434	0.006234
		-0.201243	-0.137241	-0.301979																	47.15	0.00643	0.006237
		-0.0138704	-0.136999	-0.301932																	47.18	0.006422	0.006238
		0.460779	-0.136736	-0.301917																	47.21	0.006413	0.00623
		0.120752	-0.136521	-0.301911																	47.24	0.006406	0.006225
		-0.0920862	-0.136422	-0.301884																	47.27	0.006388	0.006223
		-0.598014	-0.13619	-0.301873																	47.3	0.006383	0.006224
		-0.0024538	-0.136008	-0.301809																	47.33	0.006374	0.006222
		-0.343003	-0.13597	-0.301791																	47.36	0.006377	0.006207
		0.739528	-0.135878	-0.301739																	47.39	0.006383	0.006191
		-0.0247684	-0.135441	-0.301683																	47.42	0.00639	0.006186
		-0.323255	-0.13526	-0.301418																	47.45	0.006385	0.006185
		0.212941	-0.135063	-0.3014																	47.48	0.006385	0.006187
		-0.105839	-0.134727	-0.301091																	47.51	0.006381	0.006185
		0.215324	-0.134654	-0.301089																	47.54	0.006386	0.006177
		-0.334537	-0.134515	-0.300968																	47.57	0.006392	0.006178
		-0.094869	-0.134242	-0.300965																	47.6	0.006383	0.006173
		0.141941	-0.134169	-0.300911																	47.63	0.006372	0.006173
		-0.328868	-0.133968	-0.300864																	47.66	0.006374	0.006163
		-0.117591	-0.133681	-0.300787																	47.69	0.006374	0.006148
		0.577806	-0.133614	-0.300701																	47.72	0.006393	0.006139
		0.166115	-0.133547	-0.30065																	47.75	0.006388	0.006131
		0.119826	-0.133516	-0.300576																	47.78	0.006384	0.006135
		-0.0560148	-0.133473	-0.300536																	47.81	0.006379	0.006136
		0.277776	-0.133466	-0.300415																	47.84	0.006382	0.006137
		0.425509	-0.133259	-0.300372																	47.87	0.006398	0.006148
		0.427373	-0.132848	-0.30025																	47.9	0.006386	0.006165
		-0.219731	-0.13283	-0.300057																	47.93	0.006375	0.00618
		-0.348305	-0.132495	-0.299963																	47.96	0.006376	0.006188
		-0.217234	-0.132303	-0.29985																	47.99	0.006378	0.006179
		-0.733514	-0.131944	-0.299828																	48.02	0.006385	0.006177
		-0.0048706	-0.131387	-0.299774																	48.05	0.006383	0.006193
		-0.213533	-0.131387	-0.299737																	48.08	0.006368	0.006214
		-0.128982	-0.131254	-0.299701																	48.11	0.006364	0.006225
		-0.341054	-0.130619	-0.299415																	48.14	0.006367	0.006214
		-0.0273244	-0.130419	-0.299368																	48.17	0.006363	0.006229
		-0.263436	-0.130392	-0.299359																	48.2	0.006357	0.006253
		-0.473194	-0.13032	-0.299308																	48.23	0.006345	0.006269
		0.121032	-0.130006	-0.299083																	48.26	0.006342	0.006274
		0.158759	-0.12965	-0.298988																	48.29	0.006336	0.006278
		0.35104	-0.129632	-0.298945																	48.32	0.006346	0.006292
		-0.0684915	-0.129229	-0.298869																	48.35	0.006343	0.006313
		-0.526206	-0.12879	-0.298796																	48.38	0.006332	0.006345
		-0.417781	-0.128511	-0.298561																	48.41	0.006326	0.006358
		-0.0414883	-0.1281	-0.298543																	48.41	0.006326	0.00636
		0.181428	-0.127603	-0.298214																	48.44	0.006331	0.006367
		-0.410186	-0.127545	-0.298085																	48.47	0.006334	0.006385
		-0.052255	-0.127535	-0.298048																	48.5	0.006338	0.00641
		-0.0337641	-0.127418	-0.297845																	48.53	0.006332	0.006436
		0.429258	-0.127292	-0.297742																	48.56	0.00632	0.006473
		0.0657141	-0.127217	-0.297594																	48.59	0.006323	0.006504
		0.348321	-0.127037	-0.29759																	48.62	0.006329	0.006533
		0.00255853	-0.126888	-0.297557																	48.65	0.006338	0.006562
		0.142251	-0.12678	-0.297431																	48.68	0.006334	0.006608
		0.12698	-0.126316	-0.297346																	48.71	0.006328	0.006668
		0.345726	-0.126095	-0.297333																	48.74	0.006334	0.006701
		-0.0182301	-0.125361	-0.297194																	48.77	0.006341	0.00676
		0.257792	-0.125328	-0.296977																	48.8	0.006345	0.006802
		0.075773	-0.125092	-0.296789																	48.83	0.006336	0.006861
		0.239633	-0.12505	-0.296769																	48.86	0.006328	0.006936
		-0.0210826	-0.12501	-0.296684																	48.89	0.006324	0.006993
		-0.331843	-0.124839	-0.296639																	48.92	0.006334	0.007053
		0.153677	-0.124817	-0.296455																	48.95	0.006345	0.007107
		-0.100425	-0.124812	-0.296289																	48.98	0.006341	0.007169
		-0.276296	-0.124745	-0.296185																	49.01	0.006334	0.007244
		-0.700187	-0.124468	-0.296008																	49.04	0.006326	0.007303
		0.151191	-0.124145	-0.29583																	49.07	0.006331	0.007377
		-0.120314	-0.123616	-0.295389																	49.1	0.00634	0.007441
		0.041421	-0.123144	-0.295337																	49.13	0.006336	0.007524
		0.624813	-0.122943	-0.295298																	49.16	0.006331	0.0076
		0.356334	-0.122886	-0.295189																	49.19	0.006324	0.007647
		0.427034	-0.122838	-0.295014																	49.22	0.006332	0.007716
		-0.0316419	-0.12266	-0.294631																	49.25	0.006339	0.007778
		0.109956	-0.122582	-0.294329																	49.28	0.006335	0.007855
		0.621399	-0.122552	-0.294295																	49.31	0.006331	0.007927
		-0.293301	-0.12249	-0.294279																	49.34	0.006325	0.007998
		-0.39699	-0.122414	-0.294246																	49.37	0.006327	0.008056
		0.432005	-0.122181	-0.293936																	49.4	0.006333	0.008113
		0.433716	-0.122135	-0.293913																	49.43	0.006335	0.008179
		-0.105957	-0.122126	-0.293573																	49.46	0.006333	0.008252
		0.0347304	-0.122095	-0.293346																	49.49	0.006332	0.008307
		0.438386	-0.121909	-0.293312																	49.52	0.006349	0.008367
		0.0167728	-0.121881	-0.293301																	49.55	0.006363	0.008415
		0.437714	-0.121829	-0.293275																	49.58	0.006372	0.00849
		-0.177131	-0.121747	-0.293164																	49.61	0.006374	0.008548
		0.431875	-0.121492	-0.293141																	49.64	0.006378	0.008617
		-0.14387	-0.121474	-0.292827																	49.67	0.0064	0.008659
		-0.15905	-0.121318	-0.292763																	49.7	0.006423	0.008702
		-0.244154	-0.120883	-0.292618																	49.73	0.006431	0.008764
		0.439824	-0.120868	-0.292589																	49.76	0.006453	0.00882
		-0.171707	-0.120658	-0.29251																	49.79	0.006469	0.008902
		-0.1468	-0.120279	-0.292497																	49.82	0.006488	0.008948
		0.215704	-0.12027	-0.292476																	49.85	0.006511	0.008982
		0.132706	-0.120173	-0.292352																	49.88	0.006544	0.009035
		0.160615	-0.120155	-0.292253																	49.91	0.006565	0.009089
		-0.262677	-0.120021	-0.291716																	49.94	0.006587	0.009132
		-0.295337	-0.119886	-0.291391																	49.97	0.00662	0.009178
		0.126644	-0.119828	-0.291297																	50	0.006657	0.00921
		0.194501	-0.119761	-0.291172																	50.03	0.006675	0.009252
		0.108063	-0.119634	-0.290798																	50.06	0.00671	0.009304
		-0.472017	-0.118934	-0.290755																	50.09	0.006743	0.009356
		0.139356	-0.118931	-0.29075																	50.12	0.006785	0.009395
		0.114278	-0.118858	-0.290665																	50.15	0.006829	0.009432
		0.114759	-0.11866	-0.290499																	50.18	0.006871	0.009462
		-0.141511	-0.118621	-0.29047																	50.21	0.006913	0.009491
		0.400701	-0.118497	-0.290336																	50.24	0.006947	0.009525
		-0.0089256	-0.118452	-0.290262																	50.27	0.006997	0.009543
		0.53977	-0.118405	-0.290075																	50.3	0.00705	0.009548
		0.147266	-0.118282	-0.289952																	50.33	0.0071	0.009552
		-0.376738	-0.11821	-0.289917																	50.36	0.007148	0.009563
		0.0286659	-0.117363	-0.289852																	50.39	0.007174	0.009588
		0.0169294	-0.116911	-0.289745																	50.42	0.007225	0.009606
		0.623022	-0.116728	-0.289691																	50.45	0.007279	0.009615
		0.00206675	-0.116458	-0.28961																	50.48	0.007332	0.009612
		-0.237237	-0.116127	-0.289024																	50.51	0.007391	0.009613
		-0.196404	-0.115218	-0.288995																	50.54	0.007437	0.009627
		-0.1972	-0.115078	-0.288892																	50.57	0.007492	0.009636
		0.32495	-0.115036	-0.288788																	50.6	0.007539	0.009625
		-0.375115	-0.114917	-0.288621																	50.63	0.0076	0.009617
		0.294564	-0.11488	-0.288605																	50.66	0.007658	0.009627
		-0.0317119	-0.114703	-0.288224																	50.69	0.007712	0.00965
		-0.223997	-0.1147	-0.288143																	50.72	0.007773	0.009659
		0.482315	-0.114581	-0.288051																	50.75	0.007831	0.009666
		0.402691	-0.114563	-0.287922																	50.78	0.00788	0.009669
		0.456536	-0.11449	-0.287875																	50.81	0.007934	0.009666
		-0.317835	-0.114432	-0.287856																	50.84	0.007968	0.009676
		-0.318302	-0.11442	-0.287615																	50.87	0.008003	0.009677
		0.119105	-0.11376	-0.287535																	50.9	0.008061	0.009676
		-0.0679447	-0.113097	-0.287371																	50.93	0.008121	0.009673
		0.280069	-0.113002	-0.287328																	50.96	0.00816	0.009676
		-0.300965	-0.11299	-0.28729																	50.99	0.008185	0.009677
		-0.39087	-0.112859	-0.28709																	51.02	0.008206	0.009675
		-0.422455	-0.112617	-0.286967																	51.05	0.008242	0.009672
		0.19277	-0.112611	-0.286732																	51.08	0.008304	0.009655
		0.0717331	-0.112597	-0.286713																	51.11	0.008349	0.009646
		0.0541471	-0.112576	-0.286588																	51.15	0.008383	0.009641
		0.0576405	-0.11244	-0.286422																	51.17	0.008419	0.009637
		0.155751	-0.112334	-0.286401																	51.2	0.008454	0.009624
		0.0622648	-0.112189	-0.286385																	51.23	0.0085	0.009603
		-0.299359	-0.11213	-0.286324																	51.26	0.008535	0.009596
		0.525187	-0.111822	-0.286263																	51.29	0.008568	0.009591
		0.241494	-0.111455	-0.286254																	51.32	0.008597	0.009585
		-0.167644	-0.111295	-0.28623																	51.35	0.008627	0.009561
		-0.239207	-0.111066	-0.286193																	51.38	0.008668	0.009537
		0.593735	-0.110992	-0.285759																	51.41	0.008706	0.009534
		-0.332347	-0.110956	-0.285353																	51.44	0.008731	0.009533
		0.271777	-0.110896	-0.285226																	51.47	0.008753	0.009533
		-0.16318	-0.110545	-0.285167																	51.5	0.00878	0.009526
		0.354712	-0.110148	-0.284782																	51.53	0.008816	0.009517
		0.467603	-0.109356	-0.284531																	51.56	0.008842	0.009498
		0.217549	-0.109316	-0.284373																	51.59	0.008865	0.00949
		0.0115956	-0.109286	-0.28403																	51.62	0.00888	0.009496
		0.298754	-0.109035	-0.28393																	51.65	0.008893	0.00949
		0.340396	-0.108882	-0.283922																	51.68	0.008925	0.00949
		-0.464474	-0.107486	-0.283906																	51.71	0.008954	0.009466
		0.0692511	-0.107402	-0.283868																	51.74	0.008972	0.009457
		-0.319061	-0.107271	-0.283436																	51.77	0.008979	0.009446
		0.301291	-0.107131	-0.2834																	51.8	0.008989	0.009445
		0.0830906	-0.106934	-0.283371																	51.83	0.009019	0.009428
		-0.272709	-0.105913	-0.283207																	51.86	0.009047	0.009408
		0.128597	-0.105839	-0.283185																	51.89	0.009062	0.009395
		-0.263609	-0.10559	-0.283131																	51.92	0.009056	0.00938
		-0.128511	-0.105533	-0.282955																	51.95	0.009058	0.009384
		0.305527	-0.104643	-0.282708																	51.98	0.00907	0.009371
		0.370762	-0.104355	-0.28267																	52.01	0.009093	0.009348
		0.316869	-0.10434	-0.282304																	52.04	0.009114	0.009337
		-0.0031101	-0.104329	-0.282265																	52.07	0.009115	0.009332
		-0.104097	-0.104288	-0.282161																	52.1	0.009125	0.009323
		-0.0002937	-0.104226	-0.281798																	52.13	0.009144	0.009295
		-0.434575	-0.104141	-0.281761																	52.16	0.009166	0.009262
		-0.413982	-0.103845	-0.281741																	52.19	0.009179	0.009242
		-0.159069	-0.10379	-0.281532																	52.22	0.009193	0.009228
		-0.454542	-0.10379	-0.281168																	52.25	0.009203	0.009212
		-0.193239	-0.10366	-0.281107																	52.28	0.009215	0.009185
		-0.5882	-0.103544	-0.280973																	52.31	0.009234	0.00917
		-0.0018806	-0.103383	-0.280968																	52.34	0.009228	0.009158
		0.0150438	-0.103226	-0.280914																	52.37	0.009222	0.009148
		0.210043	-0.102995	-0.280895																	52.4	0.009216	0.009135
		0.087544	-0.102238	-0.280686																	52.43	0.009222	0.009113
		-0.180917	-0.102228	-0.280658																	52.46	0.009228	0.009081
		0.306032	-0.102192	-0.280625																	52.49	0.009238	0.009052
		-0.266901	-0.102051	-0.280452																	52.52	0.00924	0.009044
		0.171773	-0.102032	-0.280273																	52.55	0.009211	0.009046
		-0.3087	-0.101898	-0.280261																	52.58	0.009202	0.009041
		0.0171001	-0.101469	-0.280173																	52.61	0.009199	0.009019
		-1.00382	-0.101354	-0.280056																	52.64	0.009188	0.008995
		-0.270551	-0.101295	-0.280035																	52.67	0.009168	0.008994
		-0.322908	-0.100829	-0.279936																	52.7	0.009139	0.00899
		0.323242	-0.10067	-0.279929																	52.73	0.009127	0.008982
		0.130403	-0.100464	-0.279881																	52.76	0.009128	0.008973
		0.252744	-0.10043	-0.27986																	52.79	0.009128	0.008957
		-0.180777	-0.100144	-0.279738																	52.82	0.009111	0.008942
		-0.455539	-0.100017	-0.279658																	52.85	0.009091	0.008938
		0.0690348	-0.0998511	-0.279444																	52.88	0.009068	0.008914
		0.0192145	-0.0998468	-0.279311																	52.91	0.009063	0.008895
		0.393092	-0.0996029	-0.278917																	52.94	0.009051	0.008884
		0.282044	-0.0987933	-0.278791																	52.97	0.009034	0.00887
		0.314177	-0.0987388	-0.278777																	53	0.009005	0.008857
		0.162842	-0.0985993	-0.278768																	53.03	0.008991	0.008852
		-0.492353	-0.0983482	-0.278481																	53.06	0.008976	0.008828
		-0.52035	-0.0983202	-0.278334																	53.09	0.008959	0.008798
		-0.217905	-0.0981764	-0.278326																	53.12	0.008943	0.008775
		0.228331	-0.0981591	-0.278238																	53.15	0.008919	0.008764
		0.408476	-0.0980533	-0.278238																	53.18	0.008893	0.008752
		-0.0996029	-0.0978695	-0.277626																	53.21	0.008873	0.008733
		0.120761	-0.0978253	-0.277327																	53.24	0.008866	0.008713
		0.316649	-0.0977965	-0.277209																	53.27	0.008848	0.00871
		-0.0294009	-0.0974055	-0.276792																	53.3	0.008821	0.008691
		-0.0368614	-0.0972715	-0.276788																	53.33	0.008793	0.008681
		-0.238461	-0.0971473	-0.276395																	53.36	0.008779	0.008647
		0.167639	-0.0969436	-0.27634																	53.39	0.00877	0.008626
		0.171304	-0.096638	-0.276336																	53.42	0.008752	0.008615
		-0.130619	-0.0965873	-0.276296																	53.45	0.008731	0.008594
		0.252957	-0.0965539	-0.27622																	53.48	0.008698	0.008579
		0.202885	-0.0965432	-0.276082																	53.51	0.008686	0.008564
		0.041428	-0.0960722	-0.276002																	53.54	0.008681	0.008545
		0.293214	-0.0958857	-0.275977																	53.57	0.008659	0.008532
		0.127409	-0.0957506	-0.275951																	53.6	0.008647	0.00852
		-0.177445	-0.0957436	-0.275878																	53.63	0.008626	0.008506
		-0.177518	-0.0953305	-0.275825																	53.66	0.008612	0.008489
		-0.0313259	-0.0953055	-0.275805																	53.69	0.008604	0.008475
		-0.0312588	-0.0952901	-0.275555																	53.72	0.008591	0.008474
		-0.173541	-0.0949129	-0.275442																	53.75	0.008567	0.008483
		-0.303092	-0.094848	-0.275247																	53.79	0.008543	0.00848
		0.00706852	-0.0946945	-0.27521																	53.81	0.008528	0.008465
		0.0901953	-0.0943799	-0.275149																	53.84	0.008509	0.008448
		0.215896	-0.0943372	-0.275091																	53.87	0.008501	0.008434
		0.310617	-0.0943046	-0.275074																	53.9	0.008483	0.008437
		-0.254323	-0.0942736	-0.275037																	53.93	0.008455	0.008421
		0.207828	-0.0941018	-0.274971																	53.96	0.008443	0.008404
		-0.426183	-0.0940374	-0.274716																	53.99	0.008425	0.008389
		-0.32613	-0.0939907	-0.274535																	54.02	0.008421	0.008382
		0.0163649	-0.0938301	-0.274494																	54.05	0.008407	0.008364
		0.208247	-0.0937807	-0.274457																	54.08	0.008393	0.008362
		-0.186687	-0.0933287	-0.274354																	54.11	0.008383	0.00835
		-0.362516	-0.0931617	-0.274254																	54.14	0.008369	0.008327
		-0.439042	-0.093056	-0.274253																	54.17	0.008357	0.008307
		0.434906	-0.0929371	-0.274205																	54.2	0.00835	0.008293
		-0.786477	-0.092863	-0.274204																	54.23	0.008328	0.008271
		-0.291297	-0.0926588	-0.274185																	54.26	0.008316	0.008264
		0.287873	-0.0923609	-0.274012																	54.29	0.008312	0.00825
		-0.24107	-0.0919821	-0.273976																	54.32	0.008305	0.008212
		-0.266784	-0.0919484	-0.273725																	54.32	0.008301	0.008207
		0.421503	-0.0917875	-0.273667																	54.35	0.008294	0.008198
		0.0614011	-0.0915838	-0.273659																	54.38	0.008284	0.008193
		-0.0835895	-0.0914506	-0.273463																	54.41	0.008275	0.008181
		-0.0328804	-0.0914188	-0.273213																	54.44	0.008258	0.008175
		0.77211	-0.0910776	-0.273125																	54.47	0.008248	0.008172
		-0.263127	-0.0910068	-0.273028																	54.5	0.008242	0.008181
		-0.260297	-0.0907719	-0.273025																	54.53	0.008227	0.008181
		0.00061848	-0.0907631	-0.272753																	54.56	0.008217	0.008181
		-0.242073	-0.0906307	-0.272709																	54.59	0.008201	0.008185
		-0.254176	-0.0905074	-0.272572																	54.62	0.0082	0.008172
		-0.433208	-0.0903957	-0.272473																	54.65	0.008191	0.008164
		-0.420542	-0.0901361	-0.272464																	54.68	0.008176	0.008149
		-0.352933	-0.0901168	-0.27244																	54.71	0.008154	0.008146
		-0.421923	-0.0900382	-0.272433																	54.74	0.008146	0.008134
		-0.301179	-0.0899412	-0.272249																	54.77	0.008141	0.008127
		-0.0326072	-0.0898089	-0.272231																	54.8	0.008141	0.008124
		0.0717407	-0.089422	-0.272105																	54.83	0.008127	0.008116
		-0.3407	-0.0889462	-0.272048																	54.86	0.008104	0.008112
		-0.234298	-0.0886509	-0.271932																	54.89	0.008093	0.008105
		0.356447	-0.087925	-0.271901																	54.92	0.008092	0.008079
		0.0264432	-0.0873974	-0.271896																	54.95	0.008092	0.008083
		-0.338535	-0.087351	-0.271732																	54.98	0.008081	0.008083
		0.0907726	-0.0870544	-0.271673																	55.01	0.008069	0.008073
		-0.0809956	-0.0868305	-0.271614																	55.04	0.008064	0.008065
		-0.127037	-0.0863906	-0.271402																	55.07	0.008061	0.008037
		0.198527	-0.0861695	-0.271307																	55.11	0.008054	0.008024
		0.160175	-0.0855814	-0.2711																	55.13	0.00804	0.008035
		-0.50105	-0.0851778	-0.271093																	55.16	0.008023	0.008044
		0.190743	-0.0850305	-0.271071																	55.19	0.00802	0.008033
		0.117806	-0.0849648	-0.271067																	55.22	0.008015	0.008024
		-0.287328	-0.0848589	-0.270645																	55.25	0.008009	0.008009
		0.6779	-0.0845036	-0.270639																	55.28	0.007998	0.007996
		-0.411635	-0.0843438	-0.270551																	55.31	0.007985	0.007999
		-0.40234	-0.0842894	-0.270479																	55.34	0.007976	0.007995
		0.0951875	-0.0842484	-0.270441																	55.37	0.007973	0.007983
		0.351131	-0.0841117	-0.270253																	55.4	0.007964	0.007972
		-0.319894	-0.0835895	-0.270221																	55.43	0.007947	0.007974
		-0.097574	-0.0835526	-0.270186																	55.46	0.007938	0.007986
		-0.197918	-0.0832471	-0.27018																	55.49	0.007933	0.007981
		-0.0517158	-0.0831334	-0.270162																	55.52	0.007932	0.007973
		0.153914	-0.0831139	-0.270131																	55.55	0.007943	0.007979
		-0.468144	-0.0831037	-0.270056																	55.58	0.007928	0.007974
		0.229791	-0.0830379	-0.269899																	55.61	0.007915	0.00797
		0.184031	-0.0830212	-0.269877																	55.64	0.007897	0.007957
		-0.343463	-0.0828788	-0.26987																	55.67	0.007894	0.007941
		0.155529	-0.0827876	-0.269539																	55.7	0.007893	0.007935
		0.0138934	-0.0825843	-0.269426																	55.73	0.00789	0.007936
		0.0149727	-0.0825572	-0.269074																	55.76	0.007875	0.007938
		0.201264	-0.0825416	-0.269052																	55.79	0.007872	0.007936
		-0.0860434	-0.0823026	-0.268952																	55.82	0.007863	0.007935
		-0.543333	-0.0823006	-0.268888																	55.85	0.007851	0.007922
		-0.0791571	-0.0816201	-0.268877																	55.88	0.007851	0.007921
		-0.0286522	-0.0812583	-0.268753																	55.91	0.007837	0.007921
		0.110796	-0.0810729	-0.268652																	55.94	0.007828	0.007928
		0.00071106	-0.0804089	-0.268469																	55.97	0.007825	0.007923
		0.234848	-0.0802685	-0.268254																	56	0.007828	0.007914
		0.0969082	-0.0800938	-0.268023																	56.03	0.007818	0.007924
		-0.0562786	-0.0800823	-0.268011																	56.06	0.007797	0.007928
		-0.10379	-0.0799816	-0.267929																	56.09	0.007784	0.00794
		-0.0549812	-0.0798059	-0.267928																	56.12	0.007786	0.007949
		-0.0965873	-0.0796044	-0.267638																	56.15	0.007784	0.007951
		-0.203793	-0.0791162	-0.267554																	56.18	0.007785	0.007966
		0.198833	-0.079061	-0.267384																	56.21	0.007769	0.008002
		-0.152223	-0.0790251	-0.267376																	56.24	0.007741	0.008033
		-0.0069555	-0.0788783	-0.267361																	56.27	0.007739	0.008049
		-0.0491331	-0.0783378	-0.267325																	56.3	0.007742	0.008072
		0.263819	-0.0781154	-0.267255																	56.33	0.007737	0.008096
		0.119499	-0.0777579	-0.267183																	56.36	0.007729	0.008124
		-0.03818	-0.0776172	-0.267128																	56.39	0.007731	0.008181
		0.0787394	-0.0775482	-0.267124																	56.43	0.007738	0.008223
		-0.0379175	-0.0773379	-0.267066																	56.45	0.007741	0.008265
		0.155559	-0.0773241	-0.266784																	56.48	0.007741	0.008302
		-0.186007	-0.0771688	-0.26676																	56.51	0.007732	0.008351
		-0.2711	-0.0771485	-0.266744																	56.54	0.007727	0.008412
		0.206814	-0.0769947	-0.26656																	56.57	0.00772	0.008471
		-0.326742	-0.0769063	-0.266485																	56.6	0.007716	0.008527
		-0.134669	-0.0764856	-0.26639																	56.63	0.007704	0.008578
		0.0549887	-0.0762963	-0.266246																	56.66	0.007701	0.008655
		-0.290499	-0.0758484	-0.266202																	56.69	0.007685	0.008738
		-0.411887	-0.0758415	-0.265994																	56.72	0.007681	0.008801
		0.335072	-0.0753558	-0.265868																	56.75	0.007698	0.008879
		0.015162	-0.0745571	-0.265807																	56.78	0.007716	0.00895
		-0.117401	-0.0744437	-0.265675																	56.81	0.007719	0.009041
		-0.0511985	-0.0744008	-0.265627																	56.84	0.007722	0.009134
		-0.320689	-0.0743843	-0.265588																	56.87	0.00772	0.009234
		-0.15466	-0.07429	-0.265324																	56.9	0.007727	0.009321
		0.205273	-0.0741275	-0.265181																	56.93	0.007749	0.009407
		0.235648	-0.0740137	-0.26512																	56.96	0.007773	0.009522
		-0.297557	-0.0738853	-0.265113																	56.99	0.007786	0.009622
		-0.15368	-0.0736115	-0.265044																	57.02	0.007795	0.009721
		-0.416713	-0.0734219	-0.264667																	57.05	0.007821	0.009842
		0.147898	-0.0729558	-0.264647																	57.08	0.007857	0.009939
		-0.027578	-0.0727405	-0.264134																	57.11	0.007878	0.010033
		0.361394	-0.0726478	-0.264015																	57.14	0.007901	0.010128
		0.54938	-0.0726089	-0.264																	57.17	0.007918	0.010251
		0.309217	-0.0721728	-0.263984																	57.2	0.007943	0.010345
		-0.210925	-0.0721232	-0.263885																	57.23	0.007997	0.010442
		-0.0171185	-0.0720327	-0.263864																	57.26	0.008034	0.010548
		-0.125492	-0.0720094	-0.263725																	57.29	0.008091	0.010623
		0.523677	-0.0719894	-0.263609																	57.32	0.00814	0.010727
		0.0061141	-0.0717439	-0.263458																	57.35	0.008189	0.010799
		-0.250902	-0.0716906	-0.263431																	57.38	0.008248	0.010876
		0.137659	-0.0716038	-0.263348																	57.41	0.008301	0.010977
		-0.391954	-0.071581	-0.263118																	57.44	0.008368	0.011071
		-0.210429	-0.0714678	-0.263025																	57.47	0.008428	0.011149
		-0.41127	-0.0713305	-0.262693																	57.5	0.008484	0.011227
		0.273551	-0.0713129	-0.262677																	57.53	0.008561	0.011295
		-0.0184887	-0.0712135	-0.262677																	57.56	0.008648	0.011371
		-0.143389	-0.0711521	-0.262452																	57.59	0.008724	0.011448
		0.29728	-0.0710291	-0.262075																	57.62	0.008799	0.011519
		-0.141286	-0.0710157	-0.262075																	57.65	0.008883	0.011578
		-0.352325	-0.0707281	-0.262039																	57.68	0.008985	0.01162
		0.273743	-0.070422	-0.262033																	57.71	0.009085	0.011684
		-0.208365	-0.070413	-0.261889																	57.75	0.009194	0.011751
		-0.355529	-0.0703742	-0.261836																	57.77	0.00926	0.011818
		0.143664	-0.070281	-0.261832																	57.8	0.009351	0.01186
		0.369477	-0.0700621	-0.261429																	57.83	0.009437	0.01191
		0.302741	-0.0697667	-0.261252																	57.86	0.009529	0.011946
		-0.438405	-0.0696126	-0.261245																	57.89	0.009633	0.011996
		-0.299737	-0.069495	-0.260954																	57.92	0.009721	0.012056
		0.0221576	-0.0691558	-0.260795																	57.95	0.009802	0.012096
		0.293374	-0.0691506	-0.260709																	57.98	0.009887	0.012143
		-0.455727	-0.0690983	-0.260698																	58.01	0.009966	0.012169
		0.325695	-0.0686219	-0.260558																	58.04	0.010047	0.012197
		0.547142	-0.068395	-0.260297																	58.07	0.010126	0.012235
		-0.199191	-0.0682862	-0.260218																	58.1	0.010217	0.012266
		-0.195019	-0.0681955	-0.260094																	58.13	0.01029	0.012292
		0.201676	-0.0681763	-0.260051																	58.16	0.010376	0.012305
		0.241143	-0.0681639	-0.259926																	58.19	0.010456	0.012323
		0.364654	-0.0681583	-0.259673																	58.22	0.010532	0.012351
		0.29753	-0.0681559	-0.259605																	58.25	0.010597	0.012382
		-0.058763	-0.0678614	-0.259536																	58.28	0.010676	0.012403
		-0.163454	-0.0677787	-0.259394																	58.31	0.010778	0.012395
		0.5757	-0.067632	-0.259305																	58.34	0.010836	0.012419
		0.399439	-0.0674106	-0.259175																	58.37	0.010907	0.012446
		0.418302	-0.0671777	-0.25909																	58.4	0.010984	0.012468
		-0.337819	-0.0670439	-0.258988																	58.43	0.011061	0.012477
		-0.79936	-0.0670267	-0.258945																	58.46	0.011141	0.012468
[truncated: 7,946 more rows]

## Sheet: Fig.4 - fig. suppl. 1
PANEL A	raw data from the machine, for the picture profiles were aligned by the height of the 80S peak.							PANEL B					PANEL D
		wt	eIF2A ko clone 1	eIF2A KO clone 2				wt	eIF2A ko clone 1	eIF2A KO clone 2			WT	KO1	KO2		Dunnett's multiple comparisons test	Summary	Adjusted P Value
	14.09	0.0002	0.024115	0.000195			-0.97	0.000201	0.001216	0.000201		The number of stress granules, normalised to the number of nuclei in each field of view is shown.	4.31111	1.06061	1.44048		WT vs. KO1	ns	0.8762
	14.12	0.000203	0.024069	0.000203			-0.94	0.000205	0.001129	0.000203			4.65079	0.986111	0.47482		WT vs. KO2	ns	0.6818
	14.15	0.000203	0.024043	0.000203			-0.91	0.000206	0.001045	0.000205			1.57778	3.13043	0.268817
	14.18	0.000206	0.024013	0.000201			-0.88	0.000198	0.000904	0.000198			4.75	4.375	5.29412
	14.21	0.000198	0.02397	0.0002			-0.85	0.000195	0.000793	0.000195			0.466667	1.06294	1.875
	14.24	0.000198	0.023916	0.000198			-0.82	0.000201	0.000626	0.000198			1.32867	2.05714	0.943878
	14.27	0.000203	0.023834	0.0002			-0.79	0.000201	0.000488	0.0002			0.25	0.821429	1.4087
	14.3	0.000198	0.023764	0.0002			-0.76	0.000201	0.000384	0.0002			0.611111	0.796748	2.43902
	14.33	0.0002	0.023729	0.000206			-0.73	0.000206	0.000319	0.000203			1.98611	2.79167	0.847222
	14.36	0.000203	0.023702	0.0002			-0.7	0.000206	0.000265	0.000203
	14.39	0.0002	0.023663	0.000195			-0.67	0.000195	0.000249	0.000205
	14.42	0.000197	0.02362	0.000198			-0.64	0.000198	0.000241	0.000205
	14.45	0.000195	0.023523	0.000205			-0.61	0.000206	0.000232	0.000205
	14.48	0.0002	0.023496	0.000198			-0.58	0.000198	0.000214	0.000203
	14.51	0.000203	0.02349	0.000192			-0.55	0.000192	0.000206	0.000206
	14.54	0.0002	0.02346	0.000195			-0.52	0.000197	0.0002	0.0002
	14.57	0.000198	0.023396	0.00019			-0.49	0.0002	0.000201	0.000197
	14.6	0.000201	0.023304	0.0002			-0.46	0.000203	0.0002	0.000195
	14.63	0.000203	0.023263	0.000203			-0.43	0.000206	0.000197	0.000198
	14.66	0.000198	0.02329	0.000198			-0.4	0.000205	0.000192	0.000203
	14.69	0.000198	0.023295	0.000195			-0.37	0.000201	0.000192	0.000198
	14.72	0.000201	0.023217	0.000192			-0.34	0.000201	0.0002	0.0002
	14.75	0.000198	0.023125	0.000192			-0.31	0.0002	0.000203	0.000205
	14.78	0.000198	0.023068	0.000201			-0.28	0.000198	0.000203	0.000201
	14.81	0.000201	0.023035	0.000197			-0.25	0.000198	0.000203	0.000197
	14.84	0.000205	0.023038	0.000193			-0.22	0.000197	0.000208	0.000201
	14.87	0.000206	0.023012	0.000193			-0.19	0.000198	0.000197	0.000198
	14.9	0.000203	0.022938	0.000197			-0.16	0.000198	0.000195	0.0002
	14.93	0.000198	0.022855	0.000198			-0.13	0.000203	0.000198	0.000198
	14.96	0.000203	0.022819	0.0002			-0.1	0.000203	0.0002	0.0002
	14.99	0.000203	0.022803	0.000197			-0.07	0.000198	0.0002	0.000195
	15.02	0.000198	0.022782	0.000193			-0.04	0.000233	0.000195	0.000193
	15.06	0.000198	0.022738	0.000192			-0.01	0.000828	0.000205	0.000197
	15.08	0.000198	0.022733	0.000197			0.02	0.002268	0.000216	0.000224
	15.11	0.000208	0.022722	0.000197			0.05	0.00497	0.000239	0.000431
	15.14	0.000206	0.02269	0.000193			0.08	0.009548	0.00045	0.001386
	15.17	0.000201	0.022648	0.000203			0.11	0.01448	0.001083	0.00294
	15.2	0.000198	0.022595	0.000517			0.14	0.020294	0.002136	0.005819
	15.21	0.000198	0.022529	0.001716			0.17	0.026839	0.004028	0.008953
	15.23	0.000205	0.0225	0.004263			0.2	0.034024	0.006783	0.012791
	15.26	0.000619	0.022522	0.009116			0.23	0.04321	0.01111	0.017311
	15.29	0.001718	0.022511	0.014723			0.26	0.051725	0.015882	0.022419
	15.32	0.004874	0.022475	0.022792			0.29	0.062392	0.022438	0.028825
	15.35	0.008743	0.022421	0.030654			0.32	0.070433	0.02751	0.03472
	15.38	0.014253	0.022354	0.03786			0.35	0.082202	0.035066	0.040985
	15.41	0.019782	0.022326	0.048913			0.38	0.092697	0.04205	0.048799
	15.44	0.026119	0.0223	0.059263			0.41	0.103467	0.049584	0.055889
	15.47	0.033275	0.022259	0.072366			0.44	0.116253	0.059187	0.063301
	15.5	0.041359	0.022227	0.084492			0.47	0.127302	0.068014	0.071026
	15.53	0.051799	0.022216	0.097369			0.5	0.138388	0.077362	0.080277
	15.56	0.061399	0.022219	0.111018			0.53	0.149292	0.087133	0.088297
	15.59	0.071421	0.022231	0.125398			0.56	0.159696	0.097348	0.096249
	15.62	0.083452	0.022175	0.14304			0.59	0.170834	0.109684	0.105348
	15.65	0.094054	0.022062	0.158751			0.62	0.179603	0.120481	0.111655
	15.68	0.105129	0.022029	0.174767			0.66	0.189253	0.133112	0.120135
	15.71	0.116929	0.022034	0.193361			0.68	0.197258	0.143731	0.127069
	15.74	0.129526	0.022047	0.208864			0.71	0.203778	0.152315	0.133695
	15.77	0.145026	0.022015	0.223663			0.74	0.212642	0.163753	0.141002
	15.8	0.158584	0.021958	0.237708			0.77	0.21999	0.172956	0.146881
	15.83	0.174149	0.021937	0.251078			0.8	0.22827	0.183189	0.152469
	15.86	0.184994	0.021945	0.266122			0.83	0.235109	0.191715	0.157886
	15.89	0.197796	0.021977	0.278608			0.86	0.242742	0.201507	0.163055
	15.92	0.212461	0.021975	0.292701			0.89	0.248053	0.208349	0.168444
	15.95	0.224711	0.021962	0.302498			0.92	0.254348	0.216239	0.172491
	15.98	0.238331	0.021959	0.315787			0.95	0.261612	0.224822	0.177062
	16.02	0.240214	0.021966	0.326762			0.96	0.262657	0.225992	0.177754
	16.04	0.249297	0.021978	0.337315			0.98	0.267757	0.231497	0.181422
	16.07	0.259561	0.021966	0.349116			1.01	0.274545	0.238265	0.186367
	16.1	0.269343	0.021904	0.358741			1.04	0.279912	0.243279	0.191896
	16.13	0.278842	0.021836	0.369459			1.07	0.284695	0.247441	0.197957
	16.16	0.28978	0.021783	0.376766			1.1	0.288954	0.250772	0.205492
	16.19	0.299007	0.021766	0.385093			1.13	0.292927	0.253663	0.212155
	16.22	0.309389	0.021752	0.394275			1.16	0.297458	0.256847	0.219942
	16.25	0.317679	0.02171	0.401741			1.19	0.30134	0.259539	0.225402
	16.28	0.32395	0.021696	0.410033			1.22	0.305185	0.262284	0.231821
	16.31	0.331673	0.02172	0.416756			1.25	0.309606	0.265635	0.239102
	16.34	0.337315	0.021734	0.422099			1.28	0.312704	0.268127	0.245252
	16.37	0.342837	0.021733	0.429112			1.31	0.316919	0.271657	0.252402
	16.4	0.346745	0.021698	0.434709			1.34	0.320365	0.274626	0.258503
	16.43	0.34998	0.021699	0.440794			1.37	0.323655	0.277438	0.26456
	16.46	0.352662	0.021694	0.44566			1.4	0.327263	0.280554	0.270756
	16.49	0.354843	0.021653	0.450897			1.43	0.330171	0.283162	0.277294
	16.52	0.356808	0.021609	0.454985			1.46	0.333339	0.285782	0.285144
	16.55	0.358113	0.021555	0.458142			1.49	0.335424	0.288526	0.291487
	16.58	0.359169	0.02149	0.462243			1.52	0.338258	0.292038	0.297069
	16.61	0.359574	0.021444	0.465477			1.55	0.340734	0.29548	0.302504
	16.64	0.359353	0.021449	0.468967			1.58	0.343433	0.299389	0.305787
	16.67	0.358321	0.021464	0.471756			1.61	0.347035	0.304617	0.309686
	16.7	0.356449	0.021476	0.474376			1.64	0.350342	0.309417	0.312526
	16.73	0.353284	0.021458	0.476875			1.67	0.353479	0.314042	0.315481
	16.76	0.349834	0.021441	0.47934			1.7	0.356295	0.318334	0.317768
	16.79	0.345787	0.021468	0.482104			1.73	0.358744	0.322278	0.319875
	16.82	0.340306	0.021482	0.484335			1.76	0.361099	0.326397	0.322215
	16.85	0.335814	0.021468	0.486405			1.79	0.362674	0.329486	0.323744
	16.88	0.328592	0.021442	0.488716			1.82	0.364176	0.332603	0.325653
	16.91	0.321471	0.021436	0.49031			1.85	0.365123	0.334571	0.327139
	16.94	0.313419	0.021403	0.492514			1.88	0.366203	0.336695	0.3285
	16.97	0.302985	0.021363	0.494327			1.91	0.367402	0.338996	0.329956
	17	0.293315	0.021314	0.496092			1.94	0.368317	0.340891	0.331015
	17.03	0.28316	0.021252	0.498138			1.97	0.369278	0.34297	0.331913
	17.06	0.272594	0.021209	0.499925			2	0.370097	0.344675	0.332677
	17.09	0.261566	0.021192	0.502133			2.03	0.37104	0.346556	0.333367
	17.12	0.248324	0.021206	0.503767			2.06	0.371702	0.347864	0.334133
	17.15	0.236802	0.021231	0.506155			2.09	0.37248	0.349416	0.334756
	17.18	0.22325	0.021201	0.508287			2.12	0.373335	0.35113	0.335421
	17.21	0.211801	0.021176	0.510591			2.15	0.374039	0.352478	0.335865
	17.24	0.200609	0.021179	0.513406			2.18	0.374875	0.353951	0.336485
	17.27	0.189587	0.021181	0.515739			2.21	0.375579	0.355185	0.336997
	17.3	0.178734	0.0212	0.517796			2.24	0.37615	0.356223	0.337503
	17.33	0.166246	0.021208	0.519488			2.27	0.376923	0.357739	0.338079
	17.36	0.155831	0.021182	0.52063			2.3	0.377566	0.358988	0.338526
	17.39	0.144196	0.021182	0.521085			2.33	0.37832	0.36036	0.339029
	17.42	0.136352	0.021206	0.520562			2.36	0.379019	0.361488	0.339386
	17.45	0.12758	0.021215	0.518751			2.39	0.379717	0.362589	0.339832
	17.48	0.118185	0.021215	0.515956			2.42	0.38051	0.363648	0.340364
	17.51	0.110873	0.021152	0.512645			2.45	0.381079	0.364661	0.340832
	17.54	0.103036	0.021063	0.506277			2.48	0.381968	0.365803	0.341378
	17.57	0.096792	0.021017	0.499204			2.51	0.382818	0.366726	0.341927
	17.6	0.09093	0.021016	0.489426			2.54	0.383725	0.367668	0.342388
	17.63	0.085455	0.020998	0.479998			2.57	0.384775	0.368744	0.343002
	17.66	0.080412	0.020965	0.467768			2.6	0.385655	0.369641	0.343506
	17.69	0.075111	0.020925	0.458145			2.63	0.386594	0.370484	0.344028
	17.72	0.071029	0.02092	0.445441			2.66	0.387669	0.371275	0.344536
	17.75	0.066755	0.020944	0.42892			2.69	0.389019	0.372184	0.345089
	17.78	0.063602	0.020957	0.413311			2.72	0.390202	0.372958	0.345689
	17.81	0.061282	0.020954	0.393724			2.75	0.391418	0.373681	0.346058
	17.84	0.05849	0.020928	0.37606			2.78	0.392881	0.374474	0.346512
	17.87	0.056462	0.02093	0.357801			2.81	0.39423	0.375024	0.346889
	17.9	0.054389	0.020944	0.339386			2.84	0.395677	0.375806	0.347325
	17.93	0.052884	0.020979	0.321071			2.87	0.397144	0.376498	0.347646
	17.96	0.051603	0.020971	0.300178			2.9	0.398646	0.377178	0.347903
	17.99	0.05032	0.021003	0.297232			2.93	0.400517	0.377942	0.348137
	18.02	0.049489	0.021017	0.282857			2.96	0.402185	0.378562	0.348361
	18.05	0.04842	0.021027	0.266203			2.99	0.404236	0.379329	0.348562
	18.08	0.047571	0.021054	0.247766			3.02	0.405732	0.379849	0.34868
	18.11	0.046816	0.021051	0.235358			3.05	0.407486	0.380467	0.348675
	18.14	0.046058	0.021044	0.218824			3.08	0.409555	0.381132	0.34854
	18.17	0.045457	0.021066	0.20524			3.11	0.411406	0.381631	0.348385
	18.2	0.044864	0.021127	0.192086			3.14	0.413558	0.382202	0.348217
	18.23	0.044302	0.021184	0.177314			3.17	0.415352	0.382654	0.348007
	18.26	0.043774	0.021185	0.165294			3.2	0.417051	0.383065	0.347728
	18.29	0.043178	0.021176	0.154129			3.23	0.41867	0.383441	0.347349
	18.32	0.042688	0.021171	0.143982			3.26	0.42021	0.383749	0.347
	18.35	0.04209	0.021195	0.133446			3.29	0.421907	0.384082	0.346556
	18.38	0.041617	0.021227	0.125502			3.32	0.423238	0.384351	0.34619
	18.41	0.040967	0.021201	0.118549			3.35	0.424525	0.384589	0.345633
	18.44	0.040431	0.021185	0.111436			3.38	0.425431	0.384673	0.345127
	18.47	0.039882	0.021177	0.105914			3.41	0.426081	0.384732	0.344645
	18.5	0.039196	0.021187	0.100703			3.44	0.426771	0.384708	0.344087
	18.53	0.038588	0.021209	0.0958			3.47	0.427122	0.384637	0.343606
	18.56	0.03794	0.021208	0.091252			3.5	0.427223	0.384516	0.343107
	18.59	0.037488	0.021219	0.086399			3.53	0.427066	0.384339	0.342604
	18.62	0.036956	0.021292	0.082688			3.56	0.426736	0.384112	0.342145
	18.65	0.036358	0.021363	0.078873			3.59	0.426245	0.383798	0.341641
	18.68	0.035829	0.021428	0.076447			3.62	0.425532	0.383468	0.341208
	18.71	0.035204	0.021445	0.073854			3.65	0.424427	0.38304	0.340729
	18.74	0.034695	0.021458	0.071297			3.68	0.423257	0.382648	0.340334
	18.77	0.034309	0.021501	0.069443			3.71	0.421918	0.382159	0.339995
	18.77	0.03378	0.021596	0.067599			3.74	0.420197	0.381555	0.339533
	18.8	0.033351	0.021682	0.066174			3.77	0.418622	0.381116	0.339172
	18.83	0.032887	0.021772	0.064814			3.8	0.416841	0.380459	0.338679
	18.86	0.032522	0.021834	0.06355			3.83	0.414865	0.379874	0.338235
	18.89	0.032133	0.02189	0.062414			3.86	0.412485	0.379114	0.337756
	18.92	0.031813	0.021955	0.061223			3.89	0.410358	0.37835	0.337226
	18.95	0.031518	0.022064	0.060264			3.92	0.408126	0.377581	0.336737
	18.98	0.031125	0.022146	0.05919			3.95	0.405405	0.376704	0.336143
	19.01	0.030811	0.022234	0.058259			3.98	0.403338	0.37606	0.335548
	19.04	0.03047	0.022302	0.057501			4.01	0.400362	0.375083	0.334809
	19.07	0.030167	0.022395	0.056524			4.04	0.397797	0.374136	0.334111
	19.1	0.029875	0.022586	0.055744			4.07	0.395161	0.373211	0.333378
	19.13	0.029599	0.022711	0.054865			4.1	0.391904	0.372112	0.332574
	19.16	0.029347	0.022841	0.054121			4.13	0.389001	0.371116	0.331691
	19.19	0.02911	0.022936	0.053354			4.16	0.386064	0.370073	0.330546
	19.22	0.028907	0.023074	0.052638			4.19	0.383106	0.36898	0.329499
	19.25	0.028676	0.023255	0.051955			4.22	0.380088	0.367892	0.328467
	19.28	0.028441	0.023439	0.051151			4.25	0.376474	0.366628	0.327199
	19.31	0.028292	0.023621	0.050448			4.28	0.373348	0.365486	0.326192
	19.34	0.028124	0.023728	0.049769			4.32	0.369705	0.364092	0.324674
	19.37	0.027951	0.023866	0.049032			4.34	0.366644	0.362857	0.323344
	19.4	0.027761	0.024053	0.048386			4.37	0.36358	0.361596	0.321997
	19.43	0.027474	0.024265	0.047755			4.4	0.360471	0.360338	0.320389
	19.46	0.027283	0.024473	0.047122			4.43	0.357299	0.359071	0.318929
	19.49	0.027114	0.024644	0.046409			4.46	0.353641	0.357529	0.317412
	19.52	0.027003	0.024822	0.045899			4.49	0.350543	0.356156	0.315861
	19.55	0.026868	0.02512	0.045411			4.52	0.346978	0.354529	0.314099
	19.58	0.026846	0.025371	0.04487			4.53	0.346453	0.354304	0.313845
	19.61	0.026768	0.02561	0.044467			4.55	0.344374	0.353393	0.312594
	19.64	0.026705	0.025805	0.043934			4.58	0.34121	0.351983	0.311057
	19.67	0.026693	0.026061	0.043495			4.61	0.337494	0.350307	0.309165
	19.7	0.026693	0.026262	0.043072			4.64	0.33436	0.348829	0.307556
	19.73	0.026684	0.026492	0.042604			4.67	0.330747	0.347097	0.305984
	19.76	0.026673	0.026746	0.042239			4.7	0.327667	0.345604	0.30442
	19.79	0.026703	0.026944	0.041816			4.73	0.324594	0.344353	0.302804
	19.82	0.026773	0.02718	0.041522			4.76	0.321515	0.342599	0.300915
	19.85	0.026839	0.027402	0.041265			4.79	0.318462	0.341054	0.299321
	19.88	0.026895	0.027648	0.040997			4.82	0.314886	0.339251	0.297507
	19.91	0.026974	0.027869	0.040751			4.85	0.311784	0.337687	0.296249
	19.94	0.027026	0.028072	0.040461			4.88	0.308656	0.336119	0.294717
	19.97	0.027157	0.028319	0.040244			4.91	0.304942	0.334224	0.292909
	20	0.027299	0.028354	0.040055			4.94	0.302311	0.332852	0.291337
	20.03	0.027413	0.028557	0.039852			4.97	0.298657	0.330937	0.289529
	20.06	0.027531	0.028788	0.039652			5	0.29547	0.329361	0.288007
	20.09	0.027675	0.029037	0.039454			5.03	0.291693	0.327561	0.286488
	20.12	0.027792	0.029204	0.039327			5.06	0.288456	0.325996	0.28494
	20.15	0.027975	0.029393	0.039251			5.09	0.285263	0.324399	0.283381
	20.18	0.028141	0.029589	0.039197			5.12	0.281587	0.322765	0.281581
	20.21	0.028264	0.029811	0.039081			5.15	0.278994	0.321128	0.280077
	20.24	0.028425	0.029992	0.038967			5.18	0.275357	0.319262	0.278379
	20.27	0.02857	0.03016	0.038921			5.21	0.272225	0.317679	0.276877
	20.3	0.028741	0.030403	0.038896			5.24	0.269137	0.316088	0.275606
	20.33	0.028898	0.030577	0.038847			5.28	0.265615	0.314183	0.273852
	20.36	0.02905	0.030839	0.038761			5.3	0.262674	0.312585	0.272368
	20.39	0.029198	0.031077	0.038683			5.33	0.259781	0.311002	0.270615
	20.42	0.02934	0.031256	0.038636			5.36	0.256901	0.309443	0.26908
	20.45	0.02951	0.031421	0.038631			5.39	0.254094	0.307865	0.267518
	20.48	0.029694	0.031577	0.038642			5.42	0.250935	0.306011	0.265962
	20.51	0.029786	0.031772	0.038641			5.45	0.248288	0.304395	0.264424
	20.54	0.029922	0.031962	0.038652			5.48	0.245249	0.302482	0.26266
	20.57	0.0301	0.032103	0.038704			5.51	0.243069	0.301093	0.261122
	20.6	0.030309	0.032276	0.03878			5.54	0.240066	0.299115	0.259574
	20.64	0.0305	0.032419	0.038855			5.57	0.237632	0.29742	0.257767
	20.66	0.030631	0.03262	0.038888			5.6	0.235275	0.29574	0.256248
	20.69	0.030776	0.032777	0.03884			5.63	0.232585	0.293843	0.254727
	20.72	0.030934	0.032861	0.038831			5.66	0.23033	0.29218	0.25317
	20.75	0.03111	0.032961	0.038907			5.69	0.227773	0.290472	0.251271
	20.78	0.031283	0.033069	0.038994			5.72	0.225989	0.288713	0.249671
	20.81	0.031432	0.033217	0.039073			5.75	0.223853	0.286962	0.24812
	20.84	0.031554	0.033362	0.039099			5.78	0.221295	0.284929	0.246396
	20.87	0.031675	0.033481	0.039124			5.81	0.218975	0.283208	0.245157
	20.9	0.031818	0.033546	0.03921			5.84	0.216228	0.281129	0.243387
	20.93	0.031956	0.033627	0.039296			5.87	0.213845	0.279308	0.241911
	20.96	0.032048	0.033743	0.03937			5.9	0.211852	0.277765	0.240479
	20.99	0.032157	0.033849	0.039424			5.93	0.209005	0.275636	0.238802
	21.02	0.032254	0.033932	0.039492			5.96	0.20646	0.273817	0.237388
	21.05	0.032411	0.033954	0.039522			5.99	0.2034	0.271692	0.235735
	21.08	0.032516	0.033963	0.039578			6.02	0.200771	0.269871	0.234544
	21.11	0.032598	0.034	0.039619			6.05	0.198163	0.268046	0.233172
	21.14	0.032639	0.034062	0.039657			6.08	0.195038	0.266219	0.231623
	21.17	0.032665	0.034147	0.039719			6.11	0.192804	0.264408	0.230314
	21.2	0.032777	0.034201	0.03976			6.14	0.18985	0.262321	0.228736
	21.23	0.032844	0.034232	0.039814			6.17	0.187674	0.260527	0.227385
	21.26	0.032882	0.034258	0.039871			6.2	0.185709	0.25844	0.226283
	21.29	0.03288	0.034284	0.039854			6.23	0.184262	0.256743	0.224768
	21.32	0.032883	0.034303	0.039846			6.26	0.182781	0.255052	0.223417
	21.35	0.032901	0.034273	0.039836			6.29	0.181281	0.253398	0.221733
	21.38	0.032956	0.034258	0.039851			6.32	0.179784	0.251758	0.220178
	21.41	0.032994	0.034278	0.039873			6.35	0.177949	0.249871	0.218334
	21.44	0.033034	0.0343	0.039866			6.38	0.176204	0.248315	0.216732
	21.47	0.033064	0.034317	0.039846			6.41	0.174358	0.246797	0.215339
	21.5	0.033121	0.034306	0.039822			6.44	0.172188	0.245007	0.213287
	21.53	0.033171	0.034262	0.039832			6.47	0.170333	0.243703	0.211487
	21.56	0.033188	0.034228	0.039844			6.5	0.168484	0.241954	0.209395
	21.59	0.033182	0.034198	0.039871			6.53	0.166674	0.240483	0.207665
	21.62	0.033164	0.034143	0.039809			6.56	0.164866	0.239064	0.206046
	21.65	0.033163	0.034073	0.0397			6.59	0.16275	0.237397	0.204623
	21.68	0.033201	0.034033	0.03964			6.62	0.160904	0.235919	0.203543
	21.71	0.033193	0.034019	0.039621			6.65	0.158703	0.234408	0.202611
	21.74	0.033172	0.034	0.039602			6.68	0.156895	0.232874	0.201876
	21.77	0.033145	0.03393	0.039545			6.71	0.153826	0.231072	0.201034
	21.8	0.033136	0.033852	0.039441			6.74	0.150759	0.229505	0.199833
	21.83	0.03312	0.033753	0.039327			6.77	0.147574	0.227878	0.198863
	21.86	0.03309	0.033684	0.039223			6.8	0.143887	0.225913	0.197347
	21.89	0.033033	0.033632	0.03915			6.83	0.140802	0.224203	0.195897
	21.92	0.032963	0.033567	0.039026			6.86	0.137833	0.222502	0.194103
	21.95	0.032937	0.033483	0.038909			6.89	0.135063	0.220797	0.192479
	21.98	0.032942	0.033335	0.038786			6.92	0.132498	0.21909	0.190798
	22.01	0.032955	0.033231	0.038661			6.95	0.129727	0.217117	0.188786
	22.04	0.032887	0.033155	0.038572			6.98	0.127474	0.215447	0.187347
	22.07	0.032771	0.033094	0.038469			7.01	0.124944	0.213547	0.18532
	22.1	0.032734	0.032972	0.038296			7.04	0.122816	0.212248	0.183509
	22.13	0.032711	0.032817	0.0381			7.07	0.12106	0.210705	0.181593
	22.16	0.032703	0.032634	0.037938			7.1	0.118746	0.208913	0.179056
	22.19	0.032658	0.032452	0.037802			7.13	0.116867	0.207394	0.176494
	22.22	0.03256	0.032365	0.037675			7.16	0.114776	0.205665	0.173608
	22.25	0.032509	0.032243	0.037475			7.19	0.113037	0.204198	0.17056
	22.28	0.032506	0.032051	0.037273			7.22	0.111375	0.202753	0.167511
	22.31	0.032477	0.031899	0.037032			7.25	0.109766	0.201329	0.164081
	22.32	0.032433	0.031734	0.036877			7.28	0.10823	0.199941	0.161261
	22.34	0.032338	0.031588	0.036666			7.31	0.106495	0.198384	0.158237
	22.37	0.032262	0.031402	0.036422			7.34	0.105066	0.197071	0.155794
	22.4	0.032222	0.031221	0.036179			7.37	0.103464	0.195521	0.153867
	22.43	0.032225	0.031069	0.035921			7.4	0.102197	0.194176	0.151306
	22.46	0.032203	0.030879	0.03574			7.43	0.100985	0.193074	0.149243
	22.49	0.032125	0.030722	0.035597			7.46	0.09978	0.191591	0.14698
	22.52	0.032056	0.030533	0.035427			7.49	0.098528	0.190389	0.145054
	22.55	0.031995	0.030355	0.035237			7.52	0.097099	0.1889	0.142802
	22.58	0.031976	0.030194	0.03502			7.55	0.095926	0.187533	0.141203
	22.61	0.031927	0.030038	0.034831			7.58	0.094828	0.186116	0.139375
	22.64	0.03184	0.029921	0.034598			7.61	0.093561	0.184421	0.137304
	22.67	0.031762	0.029786	0.034374			7.64	0.092619	0.18317	0.135537
	22.7	0.031724	0.029604	0.03417			7.67	0.09131	0.181386	0.133507
	22.73	0.03171	0.029432	0.033862			7.7	0.090234	0.179834	0.131797
	22.76	0.031643	0.029282	0.033608			7.73	0.089225	0.178225	0.130146
	22.79	0.031562	0.029193	0.03332			7.76	0.088093	0.17635	0.128578
	22.82	0.031491	0.029044	0.03304			7.79	0.087068	0.174785	0.127099
	22.85	0.031396	0.028904	0.032779			7.82	0.086023	0.173218	0.125404
	22.88	0.031337	0.028746	0.032523			7.85	0.085086	0.171671	0.123958
	22.91	0.031278	0.028581	0.032319			7.88	0.084098	0.169916	0.122543
	22.94	0.031185	0.028462	0.032094			7.91	0.083309	0.168484	0.120978
	22.97	0.031104	0.028311	0.031921			7.94	0.082537	0.167077	0.119879
	23	0.030982	0.028149	0.031683			7.98	0.081647	0.165401	0.118313
	23.03	0.030907	0.028016	0.031508			8	0.080948	0.164195	0.117025
	23.06	0.030814	0.027873	0.031337			8.03	0.080342	0.162459	0.115611
	23.09	0.030728	0.027786	0.031153			8.06	0.079777	0.161015	0.114491
	23.12	0.030616	0.027677	0.030961			8.09	0.079208	0.159596	0.113376
	23.15	0.030598	0.027551	0.030669			8.09	0.079118	0.159361	0.113187
	23.18	0.030517	0.027421	0.030441			8.12	0.078559	0.157946	0.112229
	23.21	0.030446	0.027306	0.030248			8.15	0.077977	0.156541	0.111024
	23.24	0.030321	0.027203	0.030026			8.18	0.077367	0.154959	0.10962
	23.27	0.030244	0.027122	0.029869			8.21	0.076951	0.15392	0.108504
	23.3	0.030148	0.027074	0.029666			8.24	0.076402	0.152781	0.107406
	23.33	0.030048	0.027015	0.029483			8.27	0.075676	0.151514	0.1061
	23.36	0.03001	0.026942	0.029293			8.3	0.074988	0.150427	0.104913
	23.39	0.029967	0.026866	0.02912			8.33	0.074139	0.149113	0.10373
	23.42	0.029876	0.02683	0.029012			8.36	0.073348	0.147995	0.102598
	23.45	0.029772	0.026762	0.028877			8.39	0.072464	0.147062	0.1015
	23.48	0.029632	0.026644	0.028725			8.42	0.071559	0.145747	0.10022
	23.51	0.02957	0.026562	0.028554			8.45	0.070588	0.144591	0.099099
	23.54	0.029501	0.026538	0.028428			8.48	0.069404	0.143211	0.097824
	23.57	0.029405	0.026538	0.028283			8.51	0.068414	0.142012	0.096996
	23.6	0.029296	0.026544	0.028103			8.54	0.067194	0.140664	0.09607
	23.63	0.029218	0.026498	0.027992			8.57	0.066117	0.139549	0.095047
	23.66	0.029199	0.026386	0.027873			8.6	0.065221	0.138623	0.094184
	23.69	0.02916	0.026273	0.027766			8.63	0.064013	0.137291	0.093203
	23.72	0.029098	0.02617	0.027693			8.66	0.063001	0.136111	0.092433
	23.75	0.029001	0.026151	0.027563			8.69	0.061837	0.13473	0.091526
	23.78	0.028949	0.026111	0.027455			8.72	0.060822	0.133599	0.090857
	23.81	0.028873	0.025977	0.02736			8.75	0.059804	0.132457	0.090053
	23.84	0.028795	0.025875	0.027299			8.78	0.05885	0.131277	0.089117
	23.87	0.028754	0.025743	0.027237			8.81	0.057999	0.130049	0.088281
	23.91	0.028625	0.025682	0.027107			8.84	0.057088	0.12862	0.087346
	23.93	0.028527	0.025613	0.026982			8.87	0.056357	0.127401	0.086584
	23.96	0.028498	0.025501	0.026873			8.9	0.05562	0.126183	0.085923
	23.99	0.028447	0.025399	0.026835			8.94	0.054857	0.124752	0.084973
	24.02	0.028344	0.025326	0.026768			8.96	0.054321	0.123523	0.084156
	24.05	0.028221	0.025285	0.026708			8.99	0.053791	0.122359	0.08322
	24.08	0.028091	0.025237	0.026597			9.02	0.053219	0.121257	0.082315
	24.11	0.028005	0.025142	0.026489			9.05	0.052492	0.119975	0.081282
	24.14	0.027948	0.025054	0.026438			9.08	0.051912	0.11884	0.080177
	24.17	0.027889	0.025003	0.026387			9.11	0.051373	0.117726	0.079005
	24.2	0.027783	0.024973	0.026333			9.14	0.050702	0.116432	0.077638
	24.23	0.027705	0.024901	0.026267			9.17	0.050194	0.115546	0.07644
	24.26	0.027607	0.02482	0.026176			9.2	0.04945	0.114389	0.074977
	24.29	0.027555	0.02477	0.026146			9.23	0.048835	0.113401	0.073686
	24.32	0.027504	0.02476	0.026137			9.26	0.048267	0.112409	0.072447
	24.35	0.027428	0.024773	0.026118			9.29	0.04766	0.111249	0.071235
	24.38	0.027331	0.024795	0.026097			9.32	0.047125	0.110279	0.070073
	24.41	0.027245	0.024778	0.026059			9.35	0.046442	0.109329	0.068701
	24.44	0.02719	0.024746	0.025989			9.38	0.045947	0.108387	0.067564
	24.47	0.027133	0.024735	0.025934			9.41	0.045409	0.107448	0.066495
	24.5	0.027015	0.024768	0.025896			9.44	0.044805	0.106388	0.065307
	24.53	0.026895	0.024782	0.025851			9.47	0.044225	0.105532	0.064501
	24.56	0.026784	0.024757	0.025805			9.5	0.043552	0.104515	0.063397
	24.59	0.026685	0.024744	0.025808			9.53	0.042983	0.10361	0.062435
	24.62	0.026592	0.024735	0.025769			9.56	0.042566	0.102866	0.061556
	24.65	0.026508	0.02476	0.025716			9.59	0.042028	0.101825	0.060658
	24.68	0.026449	0.024787	0.025637			9.62	0.041533	0.100936	0.059915
	24.71	0.026373	0.024797	0.025593			9.65	0.04092	0.099919	0.059115
	24.74	0.026324	0.024768	0.025593			9.68	0.040415	0.098983	0.058532
	24.77	0.026259	0.024738	0.025605			9.71	0.039862	0.097861	0.057864
	24.8	0.026207	0.024736	0.025605			9.74	0.039426	0.097071	0.057198
	24.83	0.026157	0.024789	0.025572			9.77	0.039042	0.096183	0.056671
	24.87	0.026076	0.024787	0.025472			9.8	0.038417	0.095158	0.056021
	24.89	0.026024	0.024755	0.025398			9.83	0.037894	0.094268	0.055488
	24.92	0.025988	0.024752	0.025399			9.86	0.037354	0.09322	0.054965
	24.95	0.025962	0.024749	0.025385			9.89	0.036921	0.092321	0.054427
	24.98	0.025937	0.024773	0.025355			9.92	0.036514	0.091442	0.053904
	25.01	0.025854	0.024795	0.025322			9.95	0.036066	0.09059	0.053258
	25.04	0.025789	0.024754	0.025309			9.98	0.035581	0.08975	0.052668
	25.07	0.025751	0.02472	0.025349			10.01	0.035047	0.088778	0.051945
	25.1	0.025745	0.024751	0.025353			10.04	0.034649	0.08794	0.051344
	25.13	0.025735	0.024776	0.025352			10.07	0.034262	0.087139	0.050856
	25.16	0.025707	0.024773	0.025315			10.1	0.033802	0.086256	0.05019
	25.19	0.025702	0.02477	0.025274			10.13	0.033459	0.085636	0.049581
	25.22	0.025691	0.024759	0.025283			10.16	0.032994	0.08471	0.048822
	25.25	0.025621	0.024812	0.02532			10.19	0.032609	0.083915	0.048198
	25.28	0.02554	0.024923	0.025337			10.22	0.032192	0.08306	0.047579
	25.31	0.025456	0.024971	0.025337			10.25	0.031838	0.082383	0.046951
	25.34	0.025396	0.024989	0.025314			10.28	0.031442	0.081685	0.046329
	25.37	0.025387	0.024977	0.025301			10.31	0.031017	0.080949	0.045616
	25.4	0.025318	0.024968	0.025331			10.34	0.030768	0.080212	0.044981
	25.43	0.025233	0.024998	0.025341			10.37	0.030451	0.07937	0.044282
	25.46	0.025193	0.025011	0.025339			10.4	0.030164	0.078702	0.043697
	25.49	0.02516	0.025031	0.025318			10.43	0.029834	0.078031	0.043203
	25.52	0.025141	0.025066	0.025318			10.46	0.029423	0.077246	0.042498
	25.55	0.025184	0.025157	0.025331			10.49	0.029098	0.076563	0.041933
	25.58	0.025166	0.025214	0.025331			10.52	0.02883	0.075843	0.041351
	25.61	0.025133	0.025258	0.025356			10.55	0.028551	0.07514	0.040859
	25.64	0.025114	0.02529	0.025329			10.58	0.028237	0.074455	0.04033
	25.67	0.025087	0.025268	0.025293			10.61	0.027846	0.07363	0.039728
	25.7	0.02505	0.025236	0.025326			10.64	0.027558	0.072934	0.039302
	25.73	0.024977	0.02528	0.025353			10.67	0.027285	0.072133	0.03879
	25.76	0.024933	0.025361	0.025355			10.7	0.027025	0.071611	0.038363
	25.79	0.024914	0.025453	0.025342			10.73	0.026773	0.070978	0.037914
	25.82	0.024919	0.025472	0.025301			10.76	0.026395	0.070201	0.037413
	25.85	0.024931	0.02548	0.025296			10.79	0.026143	0.069518	0.037007
	25.88	0.024904	0.025501	0.025312			10.82	0.02588	0.068725	0.036637
	25.89	0.024881	0.025515	0.025339			10.85	0.025666	0.06809	0.036284
	25.91	0.024884	0.025547	0.025315			10.88	0.025382	0.067335	0.035938
	25.94	0.024908	0.02558	0.025314			10.91	0.025163	0.06679	0.035494
	25.97	0.024933	0.025626	0.025304			10.94	0.02495	0.06614	0.035148
	26	0.024927	0.025689	0.025317			10.97	0.024724	0.065431	0.034744
	26.03	0.024892	0.02575	0.025342			11	0.02454	0.06483	0.034431
	26.06	0.024877	0.025775	0.025349			11.03	0.024242	0.064167	0.034121
	26.09	0.024897	0.025785	0.025317			11.06	0.023981	0.063596	0.033792
	26.12	0.024939	0.025842	0.025323			11.09	0.023758	0.063082	0.033459
	26.15	0.024931	0.025908	0.025388			11.12	0.023558	0.062371	0.033115
	26.18	0.024936	0.026004	0.025477			11.15	0.02338	0.061777	0.032842
	26.21	0.024971	0.026043	0.025526			11.18	0.023112	0.061131	0.032466
	26.24	0.025044	0.02607	0.025506			11.21	0.022852	0.060589	0.032184
	26.27	0.025139	0.02614	0.02552			11.24	0.022673	0.060073	0.031841
	26.3	0.025144	0.026187	0.025564			11.27	0.022524	0.059526	0.03145
	26.33	0.025146	0.026235	0.025618			11.3	0.022395	0.058968	0.031145
	26.36	0.025123	0.026324	0.025661			11.33	0.022224	0.058424	0.030825
	26.39	0.02513	0.026389	0.025715			11.36	0.022051	0.057953	0.03052
	26.42	0.025165	0.026481	0.025745			11.39	0.021866	0.057371	0.030236
	26.45	0.025176	0.02656	0.025778			11.42	0.021769	0.056836	0.029864
	26.48	0.025161	0.026681	0.025845			11.45	0.021658	0.056332	0.029596
	26.51	0.02513	0.026755	0.0259			11.48	0.021507	0.055851	0.02928
	26.54	0.025139	0.026847	0.025937			11.51	0.021342	0.055344	0.028971
	26.57	0.025188	0.026939	0.025981			11.54	0.021136	0.054754	0.028628
	26.6	0.025249	0.027046	0.026059			11.57	0.020982	0.054216	0.028375
	26.63	0.025295	0.027206	0.026164			11.6	0.020863	0.053696	0.028208
	26.66	0.025336	0.027371	0.026248			11.63	0.020727	0.053117	0.027967
	26.69	0.025344	0.027507	0.026268			11.64	0.020697	0.053032	0.027932
	26.72	0.025374	0.027642	0.026299			11.66	0.020589	0.052711	0.027735
	26.75	0.025442	0.027821	0.026384			11.69	0.020418	0.052126	0.027429
	26.78	0.025512	0.028118	0.026498			11.72	0.020256	0.051623	0.027193
	26.81	0.025583	0.028325	0.026597			11.75	0.020139	0.051127	0.026995
	26.84	0.025637	0.028517	0.026662			11.78	0.020016	0.050573	0.0268
	26.87	0.025699	0.028692	0.026768			11.81	0.019877	0.050112	0.026595
	26.9	0.025793	0.028915	0.026898			11.84	0.019696	0.049542	0.026306
	26.93	0.025881	0.029193	0.027001			11.87	0.019587	0.049138	0.026089
	26.96	0.025961	0.029436	0.027174			11.9	0.019523	0.048669	0.025867
	26.99	0.026048	0.029778	0.027321			11.93	0.019412	0.048158	0.025647
	27.02	0.026149	0.030003	0.027524			11.96	0.019285	0.047747	0.025426
	27.05	0.026316	0.030236	0.027686			11.99	0.019125	0.047224	0.025199
	27.08	0.026456	0.030612	0.027853			12.02	0.019009	0.046778	0.024987
	27.11	0.026609	0.030673	0.028021			12.05	0.018897	0.046325	0.024825
	27.14	0.026758	0.030991	0.028192			12.08	0.018837	0.045879	0.024671
	27.17	0.026914	0.031363	0.0284			12.11	0.018697	0.045462	0.024494
	27.2	0.027085	0.031691	0.028605			12.14	0.01851	0.044973	0.024211
	27.23	0.027203	0.032064	0.028852			12.17	0.018396	0.044564	0.024023
	27.26	0.027418	0.032412	0.029175			12.21	0.018308	0.044082	0.023793
	27.29	0.027599	0.032817	0.029428			12.23	0.01824	0.043716	0.023593
	27.32	0.027778	0.033259	0.029688			12.26	0.018175	0.043417	0.02338
	27.35	0.028035	0.033632	0.029978			12.29	0.018042	0.042988	0.023103
	27.38	0.028256	0.03409	0.030294			12.32	0.01792	0.042604	0.022911
	27.41	0.028511	0.034501	0.030673			12.35	0.017899	0.042122	0.022767
	27.44	0.028704	0.034885	0.030977			12.38	0.017847	0.041765	0.022606
	27.47	0.028944	0.035399	0.031351			12.41	0.017733	0.041441	0.022443
	27.5	0.029279	0.035816	0.031626			12.44	0.017641	0.041091	0.022208
	27.53	0.029566	0.036284	0.032006			12.47	0.017566	0.040688	0.022037
	27.56	0.029922	0.036752	0.032455			12.5	0.017487	0.040242	0.02189
	27.59	0.030214	0.037227	0.032787			12.53	0.017416	0.039897	0.021783
	27.62	0.030443	0.03766	0.033202			12.56	0.017301	0.03953	0.021682
	27.65	0.030782	0.038085	0.033605			12.6	0.017168	0.039211	0.021487
	27.68	0.031093	0.038572	0.034055			12.62	0.017081	0.038932	0.021327
	27.71	0.031443	0.039035	0.034504			12.65	0.01703	0.038507	0.021181
	27.74	0.031719	0.039551	0.034921			12.68	0.016954	0.038127	0.021076
	27.77	0.032041	0.040147	0.03538			12.71	0.016838	0.03773	0.020957
	27.8	0.032365	0.04062	0.035805			12.74	0.016707	0.037426	0.020871
	27.83	0.032655	0.041062	0.036317			12.77	0.016597	0.03711	0.020725
	27.86	0.033042	0.041563	0.036783			12.8	0.016527	0.036721	0.020578
	27.89	0.033329	0.042166	0.037167			12.83	0.016483	0.036447	0.020476
	27.92	0.033638	0.042672	0.037698			12.86	0.016404	0.036105	0.020369
	27.95	0.033925	0.043148	0.038189			12.89	0.016305	0.035795	0.020251
	27.98	0.034265	0.043663	0.038791			12.92	0.016207	0.035462	0.020093
	28.01	0.034603	0.044034	0.039267			12.95	0.016121	0.03507	0.019974
	28.04	0.034902	0.04455	0.039752			12.98	0.016109	0.034766	0.019882
	28.07	0.035216	0.044953	0.040234			13.01	0.01601	0.034525	0.019782
	28.1	0.035457	0.045321	0.040732			13.04	0.015928	0.034279	0.019685
	28.13	0.035724	0.045752	0.041305			13.07	0.015825	0.033986	0.019547
	28.16	0.036035	0.046153	0.041787			13.1	0.01573	0.033613	0.019354
	28.19	0.036265	0.046613	0.042331			13.13	0.015688	0.033351	0.019255
	28.22	0.03659	0.046892	0.042747			13.16	0.015622	0.033083	0.019128
	28.25	0.036826	0.047311	0.043154			13.19	0.015566	0.032842	0.018992
	28.28	0.037113	0.047669	0.043613			13.22	0.01549	0.03256	0.018829
	28.31	0.037397	0.047976	0.044053			13.25	0.0154	0.032247	0.01867
	28.34	0.037695	0.048382	0.044578			13.28	0.015366	0.031972	0.018559
	28.37	0.037968	0.04874	0.045024			13.31	0.015366	0.0317	0.01847
	28.4	0.038179	0.049035	0.045414			13.34	0.015316	0.031496	0.018419
	28.43	0.038485	0.049314	0.045931			13.37	0.01523	0.03124	0.018305
	28.46	0.038745	0.049615	0.04634			13.4	0.015198	0.031025	0.018191
	28.49	0.038975	0.049955	0.046845			13.43	0.015165	0.03076	0.018097
	28.53	0.039159	0.050248	0.047233			13.46	0.01513	0.030516	0.017986
	28.55	0.039296	0.050548	0.047592			13.49	0.015084	0.030305	0.017885
	28.58	0.039481	0.050768	0.048047			13.52	0.015016	0.029997	0.017755
	28.61	0.039681	0.050951	0.048461			13.55	0.014979	0.029686	0.017615
	28.64	0.039866	0.051205	0.048906			13.58	0.014921	0.029397	0.017507
	28.67	0.040066	0.051447	0.048965			13.61	0.014889	0.029155	0.017393
	28.7	0.04022	0.051729	0.049214			13.64	0.014826	0.02895	0.017298
	28.73	0.040377	0.051926	0.049542			13.67	0.014759	0.028693	0.017189
	28.76	0.040536	0.052121	0.049895			13.7	0.014762	0.028463	0.017106
	28.79	0.040656	0.052346	0.050242			13.73	0.01478	0.02817	0.017009
	28.82	0.040763	0.052534	0.05067			13.76	0.014764	0.027997	0.016921
	28.85	0.040843	0.052713	0.051002			13.79	0.014688	0.027886	0.016838
	28.88	0.040986	0.052843	0.051295			13.82	0.014586	0.027716	0.016726
	28.91	0.041111	0.052922	0.051572			13.85	0.014539	0.027526	0.016619
	28.94	0.041221	0.053041	0.051837			13.88	0.014534	0.027255	0.016505
	28.97	0.041294	0.053162	0.052123			13.91	0.014497	0.02705	0.016454
	29	0.041341	0.053289	0.052359			13.94	0.014418	0.026874	0.016413
	29.03	0.041449	0.053406	0.052588			13.97	0.014313	0.026668	0.01631
	29.06	0.041548	0.053511	0.052765			14	0.014293	0.026435	0.01621
	29.09	0.041622	0.053596	0.053009			14.03	0.014299	0.026145	0.016125
	29.12	0.041698	0.05368	0.053271			14.06	0.014317	0.025958	0.016085
	29.15	0.041754	0.053739	0.053468			14.09	0.014266	0.025818	0.016029
	29.18	0.041808	0.053748	0.053652			14.12	0.014152	0.025658	0.015936
	29.21	0.041871	0.053779	0.053771			14.15	0.014068	0.025477	0.015863
	29.24	0.041963	0.053844	0.053902			14.18	0.014058	0.025266	0.015793
	29.27	0.04202	0.053918	0.05404			14.21	0.014079	0.02512	0.015734
	29.3	0.042049	0.053999	0.054156			14.24	0.014087	0.024963	0.015703
	29.33	0.04212	0.054013	0.054227			14.27	0.014061	0.024766	0.015615
	29.36	0.042215	0.053988	0.054242			14.3	0.013998	0.024606	0.015558
	29.39	0.042323	0.053963	0.054284			14.33	0.013928	0.024395	0.015536
	29.42	0.042352	0.053967	0.05431			14.36	0.013898	0.024262	0.015542
	29.45	0.042371	0.054005	0.05433			14.39	0.013865	0.024096	0.015536
	29.45	0.042436	0.054005	0.054304			14.42	0.013817	0.023932	0.015476
	29.49	0.042544	0.053982	0.054264			14.45	0.013771	0.023756	0.01539
	29.51	0.042617	0.053953	0.054296			14.48	0.013757	0.023556	0.015316
	29.54	0.04268	0.053924	0.05434			14.51	0.01379	0.023372	0.015306
	29.57	0.042745	0.053882	0.054351			14.54	0.013807	0.02323	0.0153
	29.6	0.042786	0.053842	0.054243			14.57	0.01379	0.02312	0.015293
	29.63	0.042854	0.05378	0.054166			14.6	0.013768	0.023014	0.015259
	29.66	0.042929	0.053682	0.054091			14.63	0.013757	0.022857	0.015146
	29.69	0.042984	0.053622	0.054064			14.66	0.013771	0.022687	0.015105
	29.72	0.043023	0.053598	0.053999			14.69	0.013714	0.022505	0.01509
	29.75	0.043078	0.053569	0.053847			14.72	0.013625	0.022386	0.01507
	29.78	0.043154	0.053503	0.053714			14.75	0.01357	0.022288	0.015043
	29.81	0.043294	0.053425	0.053615			14.78	0.013539	0.022086	0.015024
	29.84	0.043375	0.053346	0.053558			14.81	0.013551	0.021896	0.015016
	29.87	0.043421	0.053295	0.053453			14.84	0.013579	0.021766	0.015033
	29.9	0.043478	0.053292	0.053306			14.87	0.013563	0.021656	0.015035
	29.93	0.043584	0.053233	0.053185			14.9	0.013522	0.021528	0.015041
	29.96	0.043746	0.053128	0.05303			14.93	0.013498	0.021418	0.014962
	29.99	0.043855	0.053078	0.052955			14.96	0.013506	0.021276	0.014899
	30.02	0.043955	0.053049	0.052868			14.99	0.01347	0.021117	0.014846
	30.05	0.044033	0.053022	0.052746			15.02	0.013393	0.020982	0.014822
	30.08	0.044187	0.05302	0.052618			15.05	0.013317	0.02083	0.014808
	30.11	0.044285	0.053003	0.052499			15.08	0.013278	0.020697	0.014773
	30.14	0.044425	0.052963	0.052434			15.11	0.013289	0.020538	0.014743
	30.17	0.044567	0.052994	0.052358			15.14	0.013314	0.020418	0.014781
	30.2	0.044678	0.053017	0.052269			15.17	0.013317	0.020329	0.014803
	30.23	0.04485	0.053005	0.052169			15.2	0.013279	0.020216	0.014751
	30.26	0.044883	0.052998	0.052102			15.21	0.013278	0.020204	0.014729
	30.29	0.04503	0.053009	0.052031			15.23	0.013279	0.020094	0.014635
	30.32	0.045183	0.05302	0.05195			15.26	0.013292	0.019944	0.014556
	30.35	0.045292	0.053074	0.051899			15.29	0.013297	0.019771	0.014535
	30.38	0.045414	0.053127	0.051842			15.32	0.013297	0.019706	0.014543
	30.41	0.045639	0.053162	0.051807			15.35	0.013236	0.019607	0.014539
	30.44	0.045828	0.053198	0.051775			15.38	0.013162	0.019503	0.014505
	30.47	0.046003	0.0533	0.051723			15.41	0.013122	0.019374	0.014499
	30.5	0.046142	0.053417	0.051684			15.44	0.013114	0.019222	0.014456
	30.53	0.046286	0.053511	0.051595			15.47	0.0131	0.019166	0.014405
	30.56	0.046528	0.053601	0.051565			15.5	0.013051	0.019114	0.014348
	30.59	0.046772	0.05372	0.051566			15.53	0.013014	0.01904	0.014291
	30.62	0.047037	0.053845	0.051582			15.56	0.013037	0.018889	0.014263
	30.65	0.047236	0.054007	0.05163			15.59	0.013073	0.018756	0.014267
	30.68	0.047428	0.054034	0.051682			15.62	0.013079	0.018673	0.014286
	30.71	0.047654	0.054112	0.051741			15.65	0.013022	0.018569	0.014294
	30.74	0.047871	0.054264	0.051763			15.68	0.012934	0.018448	0.014269
	30.77	0.048155	0.054372	0.051788			15.71	0.012859	0.018332	0.014226
	30.8	0.048362	0.054545	0.051847			15.74	0.012856	0.018218	0.014175
	30.83	0.048546	0.054768	0.051933			15.77	0.012862	0.018139	0.014123
	30.86	0.048788	0.054971	0.051961			15.8	0.012815	0.01809	0.014069
	30.89	0.049	0.055168	0.052031			15.83	0.012773	0.017986	0.014044
	30.92	0.049293	0.055334	0.052145			15.87	0.012762	0.017828	0.014009
	30.95	0.049542	0.055568	0.05224			15.89	0.012792	0.017726	0.014007
	30.98	0.049807	0.055837	0.052334			15.92	0.012829	0.01762	0.014033
	31.01	0.05011	0.056066	0.052407			15.95	0.012818	0.017519	0.014048
	31.04	0.050419	0.056327	0.052529			15.98	0.012783	0.017446	0.013988
	31.07	0.050802	0.05656	0.052689			16.01	0.012786	0.017339	0.01388
	31.1	0.051062	0.056798	0.0528			16.04	0.012826	0.017233	0.013831
	31.13	0.051368	0.057182	0.052935			16.07	0.01284	0.017133	0.013825
	31.16	0.051723	0.057521	0.053051			16.1	0.01283	0.017106	0.013817
	31.19	0.052069	0.057847	0.053203			16.13	0.012791	0.017049	0.013785
	31.22	0.052527	0.058116	0.053366			16.16	0.012767	0.016918	0.013758
	31.25	0.052928	0.058433	0.053549			16.19	0.012794	0.01678	0.013765
	31.28	0.053298	0.058803	0.053709			16.22	0.012827	0.016678	0.013795
	31.31	0.053642	0.059168	0.053806			16.25	0.012759	0.016627	0.013793
	31.34	0.054042	0.059574	0.053975			16.28	0.012642	0.016596	0.013731
	31.37	0.054541	0.059929	0.05421			16.31	0.012577	0.016492	0.013644
	31.4	0.054971	0.060394	0.054438			16.34	0.012589	0.016378	0.013565
	31.43	0.055485	0.060835	0.054616			16.37	0.012604	0.016294	0.013558
	31.46	0.055888	0.061285	0.054757			16.4	0.012575	0.016236	0.013571
	31.49	0.056372	0.061685	0.054928			16.43	0.012539	0.016164	0.01356
	31.52	0.056958	0.062013	0.055127			16.46	0.012524	0.016094	0.013531
	31.55	0.057468	0.062471	0.055311			16.49	0.012532	0.016037	0.01352
	31.58	0.058032	0.06289	0.055571			16.52	0.01258	0.015942	0.013524
	31.61	0.058527	0.063301	0.055761			16.55	0.012596	0.015898	0.013533
	31.64	0.059063	0.063805	0.056005			16.58	0.012564	0.015868	0.013489
	31.67	0.059628	0.064152	0.056303			16.61	0.01254	0.015828	0.013387
	31.7	0.060172	0.064627	0.05664			16.64	0.01254	0.015741	0.013327
	31.73	0.060871	0.065099	0.05686			16.67	0.012575	0.015657	0.013303
	31.76	0.061472	0.065594	0.057093			16.7	0.012577	0.015606	0.013306
	31.79	0.062195	0.066165	0.057357			16.73	0.012515	0.015592	0.013313
	31.82	0.062865	0.066641	0.057629			16.76	0.012423	0.015539	0.013287
	31.85	0.063432	0.067223	0.057978			16.79	0.012374	0.015455	0.013286
	31.88	0.064175	0.067665	0.058314			16.82	0.012375	0.015359	0.013282
	31.91	0.064809	0.068325	0.058616			16.85	0.012372	0.015319	0.013287
	31.94	0.065594	0.068886	0.058881			16.88	0.01234	0.015314	0.013302
	31.97	0.066271	0.069446	0.059185			16.91	0.012306	0.015249	0.013278
	32	0.06699	0.070152	0.059572			16.94	0.012285	0.015159	0.013254
	32.03	0.06784	0.070812	0.059926			16.97	0.012323	0.015071	0.013271
	32.06	0.068433	0.071484	0.060259			17	0.012344	0.015013	0.013297
	32.09	0.069354	0.072163	0.060652			17.03	0.012318	0.014967	0.013302
	32.12	0.070217	0.072774	0.060965			17.06	0.012283	0.01491	0.013281
	32.15	0.071077	0.07351	0.061436			17.09	0.012267	0.014835	0.013241
	32.18	0.072082	0.074212	0.061796			17.12	0.012306	0.014767	0.013275
	32.21	0.072932	0.075089	0.062143			17.15	0.012352	0.014702	0.013305
	32.24	0.073782	0.07573	0.062213			17.18	0.012325	0.014659	0.013308
	32.27	0.074667	0.076472	0.062611			17.21	0.012279	0.014621	0.013276
	32.3	0.075582	0.077395	0.063017			17.24	0.012288	0.014558	0.013195
	32.33	0.076667	0.078233	0.063447			17.27	0.012312	0.014515	0.01311
	32.36	0.077652	0.079279	0.063908			17.3	0.012366	0.01448	0.013068
	32.39	0.078804	0.080158	0.064405			17.33	0.012334	0.014431	0.013076
	32.42	0.079815	0.08101	0.064817			17.36	0.012285	0.014374	0.013064
	32.45	0.080865	0.081898	0.065339			17.39	0.012277	0.014302	0.013033
	32.48	0.081928	0.08284	0.065975			17.42	0.012272	0.014236	0.013022
	32.51	0.083019	0.083961	0.066522			17.45	0.012258	0.014183	0.01303
	32.54	0.084348	0.084897	0.06709			17.48	0.012172	0.014128	0.013046
	32.57	0.085533	0.085947	0.067689			17.51	0.012103	0.014107	0.013053
	32.6	0.086973	0.08689	0.06826			17.54	0.01205	0.014048	0.013013
	32.63	0.088031	0.087758	0.068963			17.57	0.012068	0.014014	0.013007
	32.66	0.089311	0.08906	0.069597			17.6	0.012098	0.014014	0.013035
	32.69	0.090836	0.090203	0.070388			17.63	0.012077	0.013988	0.013046
	32.72	0.092207	0.091526	0.070972			17.66	0.01205	0.013942	0.013048
	32.76	0.093902	0.092673	0.071722			17.69	0.012036	0.013874	0.013024
	32.78	0.095366	0.093854	0.072596			17.72	0.01206	0.013819	0.013007
	32.81	0.096604	0.095336	0.073362			17.75	0.012091	0.013773	0.013027
	32.84	0.098311	0.096425	0.07432			17.78	0.012085	0.013763	0.013051
	32.87	0.099781	0.09797	0.075138			17.81	0.012057	0.013712	0.013054
	32.9	0.101584	0.099332	0.076134			17.84	0.012026	0.013628	0.013019
	32.93	0.103172	0.10073	0.076911			17.87	0.012052	0.01357	0.013008
	32.96	0.104967	0.102446	0.077898			17.9	0.012088	0.013519	0.013026
	32.99	0.106493	0.103968	0.079064			17.93	0.012109	0.013531	0.01298
	33	0.107766	0.105548	0.080055			17.96	0.012074	0.013558	0.012919
	33.02	0.109581	0.107165	0.081213			17.99	0.012023	0.013498	0.012827
	33.05	0.111118	0.109094	0.082296			18.02	0.012037	0.013408	0.012802
	33.08	0.112845	0.110785	0.083244			18.05	0.012077	0.013322	0.012807
	33.11	0.114302	0.112515	0.084608			18.08	0.012114	0.013314	0.012805
	33.14	0.115722	0.114591	0.085791			18.11	0.012079	0.013343	0.012802
	33.17	0.117119	0.116405	0.087158			18.14	0.012036	0.013292	0.012786
	33.2	0.118435	0.118248	0.088353			18.17	0.012034	0.013208	0.012762
	33.23	0.119901	0.120147	0.089612			18.2	0.012076	0.013119	0.01278
	33.26	0.121108	0.122034	0.090941			18.23	0.012103	0.01306	0.012808
	33.29	0.122243	0.124165	0.092289			18.26	0.012079	0.013081	0.012807
	33.32	0.123487	0.125945	0.09391			18.29	0.012037	0.013076	0.012804
	33.35	0.124473	0.128064	0.095339			18.32	0.012033	0.013046	0.012784
	33.38	0.125371	0.129588	0.096809			18.35	0.012088	0.013021	0.012786
	33.41	0.126176	0.131361	0.098587			18.38	0.01211	0.012968	0.012804
	33.44	0.126931	0.133313	0.100105			18.41	0.01209	0.012932	0.012813
	33.47	0.127748	0.134896	0.101624			18.44	0.012069	0.012907	0.012796
	33.5	0.128381	0.136677	0.103196			18.47	0.012014	0.012832	0.012756
	33.53	0.12903	0.13819	0.105089			18.5	0.011961	0.012786	0.012764
	33.56	0.129437	0.139408	0.106725			18.53	0.011915	0.012794	0.012792
	33.59	0.129948	0.14107	0.10835			18.56	0.011877	0.012808	0.01281
	33.62	0.130336	0.14241	0.11025			18.59	0.011804	0.012818	0.012737
	33.65	0.130655	0.143842	0.111643			18.62	0.011788	0.012807	0.012634
	33.68	0.130907	0.145003	0.113625			18.65	0.011823	0.01277	0.012569
	33.71	0.131044	0.146293	0.115301			18.68	0.011831	0.012769	0.012566
	33.74	0.131144	0.147316	0.116971			18.71	0.011817	0.01275	0.012574
	33.77	0.131209	0.148088	0.118935			18.74	0.011798	0.012697	0.012575
	33.8	0.131201	0.149081	0.120434			18.77	0.01179	0.012624	0.012545
	33.83	0.131194	0.149883	0.122446			18.77	0.011801	0.01261	0.012543
	33.86	0.131134	0.150759	0.123778			18.8	0.01182	0.012556	0.012532
	33.89	0.131002	0.151438	0.125356			18.83	0.01183	0.012532	0.012547
	33.92	0.130817	0.152034	0.127128			18.86	0.011808	0.012556	0.01255
	33.95	0.130662	0.152576	0.128614			18.89	0.011773	0.012572	0.012553
	33.98	0.13052	0.153114	0.130351			18.92	0.011757	0.012547	0.012512
	34.01	0.130244	0.15371	0.131829			18.95	0.011774	0.012442	0.012439
	34.04	0.129954	0.154148	0.133258			18.98	0.01182	0.012385	0.012391
	34.07	0.129574	0.154473	0.134587			19.01	0.011834	0.012363	0.012352
	34.1	0.12921	0.15476	0.135844			19.04	0.011796	0.012364	0.012323
	34.13	0.128744	0.154957	0.137302			19.07	0.011781	0.012323	0.012294
	34.16	0.128373	0.155125	0.138522			19.1	0.011793	0.012298	0.012293
	34.19	0.127904	0.155238	0.13983			19.13	0.011833	0.012282	0.012298
	34.22	0.127283	0.155273	0.140875			19.16	0.011836	0.012258	0.012323
	34.25	0.126749	0.155268	0.141713			19.19	0.011798	0.012244	0.012326
	34.28	0.126065	0.155217	0.142837			19.22	0.011782	0.012172	0.012291
	34.31	0.12545	0.155101	0.143757			19.25	0.011781	0.01209	0.01228
	34.34	0.124781	0.154952	0.144708			19.28	0.011827	0.012049	0.012301
	34.37	0.124051	0.154832	0.145419			19.31	0.011855	0.012049	0.012323
	34.4	0.123322	0.154602	0.146095			19.34	0.011823	0.012071	0.012326
	34.43	0.122516	0.15434	0.14677			19.37	0.011793	0.012074	0.012279
	34.46	0.121798	0.154045	0.147363			19.4	0.011796	0.012049	0.012217
	34.49	0.120998	0.153622	0.147926			19.43	0.011812	0.012034	0.012149
	34.52	0.12001	0.153204	0.148328			19.46	0.01183	0.012053	0.01211
	34.55	0.119312	0.152711	0.148665			19.49	0.011804	0.012074	0.012101
	34.58	0.118411	0.152102	0.148965			19.53	0.011787	0.012071	0.012082
	34.61	0.117584	0.151473	0.149106			19.55	0.011782	0.012057	0.012049
	34.64	0.116665	0.150727	0.149232			19.58	0.011806	0.012041	0.012044
	34.67	0.115574	0.149966	0.149228			19.61	0.011846	0.012042	0.012082
	34.7	0.114667	0.149075	0.149094			19.64	0.011825	0.012068	0.01209
	34.73	0.113798	0.14824	0.148959			19.67	0.011784	0.012064	0.012045
	34.76	0.112918	0.147504	0.14878			19.7	0.011766	0.012066	0.01202
	34.79	0.111873	0.146502	0.148475			19.73	0.011798	0.012026	0.012034
	34.82	0.110957	0.145571	0.148201			19.76	0.01183	0.012031	0.012068
	34.85	0.110026	0.144377	0.147609			19.79	0.011844	0.012072	0.012088
	34.88	0.108943	0.143313	0.147054			19.82	0.011812	0.012064	0.012063
	34.91	0.108023	0.142049	0.146453			19.85	0.011784	0.012076	0.01202
	34.94	0.10711	0.14113	0.14576			19.88	0.011804	0.012039	0.012025
	34.97	0.106185	0.140073	0.145072			19.91	0.011833	0.012036	0.012045
	35	0.105216	0.138772	0.144272			19.94	0.011838	0.012058	0.012071
	35.03	0.104093	0.13761	0.143448			19.97	0.011806	0.012057	0.012063
	35.06	0.103142	0.136206	0.142605			20	0.011763	0.011977	0.012039
	35.09	0.102046	0.134979	0.141609			20.03	0.011777	0.011866	0.012033
	35.12	0.101248	0.13373	0.140655			20.06	0.011822	0.011831	0.012053
	35.15	0.100249	0.13246	0.139433			20.09	0.011833	0.011828	0.012069
	35.18	0.099123	0.131161	0.13838			20.12	0.011809	0.011839	0.012047
	35.21	0.09816	0.1296	0.137329			20.15	0.011785	0.011815	0.012026
	35.24	0.097023	0.128311	0.136204			20.18	0.011792	0.01179	0.012033
	35.27	0.096059	0.127017	0.135018			20.21	0.011836	0.011774	0.012052
	35.3	0.094919	0.125494	0.133611			20.24	0.011869	0.011806	0.012058
	35.33	0.094119	0.124389	0.132343			20.27	0.011814	0.011823	0.012069
	35.36	0.093191	0.122836	0.130884			20.3	0.011766	0.011817	0.01205
	35.39	0.092123	0.121493	0.129827			20.33	0.011769	0.011793	0.012039
	35.42	0.091177	0.119993	0.128528			20.36	0.011825	0.011782	0.012044
	35.45	0.090062	0.118672	0.126961			20.39	0.011846	0.011793	0.012069
	35.48	0.089133	0.117298	0.125577			20.42	0.011815	0.011812	0.012055
	35.51	0.088364	0.115882	0.123932			20.45	0.011779	0.011822	0.012045
	35.54	0.087315	0.11447	0.122524			20.49	0.011792	0.01179	0.012034
	35.57	0.086413	0.112851	0.121047			20.51	0.011827	0.011777	0.012041
	35.6	0.085284	0.11146	0.11953			20.54	0.011836	0.011801	0.01206
	35.63	0.084354	0.11006	0.117993			20.57	0.011814	0.01182	0.01206
	35.66	0.083484	0.108374	0.116234			20.6	0.011793	0.01182	0.012041
	35.69	0.082493	0.106969	0.114769			20.63	0.011782	0.011825	0.01203
	35.72	0.081812	0.105583	0.113306			20.66	0.011825	0.011788	0.01203
	35.75	0.080794	0.104203	0.111566			20.69	0.011871	0.011782	0.012069
	35.78	0.079922	0.102821	0.111316			20.72	0.011895	0.011804	0.012085
	35.81	0.079065	0.101215	0.110344			20.75	0.011952	0.011825	0.01206
	35.84	0.078041	0.099807	0.108628			20.78	0.011993	0.011803	0.012044
	35.87	0.077167	0.0982	0.107153			20.81	0.012057	0.011777	0.012039
	35.9	0.076272	0.097077	0.105443			20.84	0.01209	0.011784	0.012061
	35.93	0.075411	0.095732	0.104022			20.87	0.012061	0.011812	0.01208
	35.96	0.074448	0.094145	0.102639			20.9	0.012039	0.011833	0.012042
	35.99	0.073644	0.092809	0.101258			20.93	0.012069	0.011823	0.012015
	36.02	0.072845	0.091266	0.099913			20.96	0.012156	0.011801	0.012061
	36.05	0.071855	0.089988	0.098401			20.99	0.01225	0.011782	0.01218
	36.08	0.071175	0.088478	0.097052			21.02	0.01229	0.011814	0.012253
	36.11	0.070295	0.087419	0.095691			21.05	0.01229	0.011817	0.012286
	36.14	0.06954	0.086167	0.094189			21.08	0.012326	0.011798	0.01228
	36.17	0.068793	0.08477	0.092917			21.11	0.012432	0.01179	0.012294
	36.2	0.067906	0.083631	0.091663			21.14	0.012547	0.011781	0.012359
	36.23	0.067145	0.082332	0.090408			21.17	0.012623	0.011852	0.01244
	36.26	0.066333	0.081217	0.089174			21.2	0.012675	0.01196	0.012509
	36.29	0.065781	0.080378	0.087764			21.23	0.012715	0.011999	0.012515
	36.32	0.065099	0.079018	0.08657			21.26	0.012797	0.01202	0.012543
	36.35	0.06432	0.077999	0.085241			21.29	0.012926	0.012026	0.012647
	36.38	0.063646	0.076832	0.084307			21.32	0.013013	0.012036	0.012742
	36.42	0.062876	0.07583	0.082979			21.35	0.013095	0.012085	0.012805
	36.44	0.062237	0.074821	0.081828			21.38	0.013171	0.012139	0.01287
	36.47	0.061585	0.073675	0.080651			21.41	0.013319	0.01218	0.012911
	36.5	0.060907	0.073027	0.079381			21.44	0.013463	0.012231	0.013007
	36.53	0.060229	0.071895	0.078291			21.47	0.013601	0.012282	0.013103
	36.56	0.05946	0.070994	0.077205			21.5	0.013728	0.012363	0.013194
	36.57	0.058825	0.069941	0.076125			21.53	0.013819	0.012429	0.013276
	36.59	0.058135	0.069078	0.075075			21.56	0.013995	0.012472	0.013379
	36.62	0.057534	0.068241	0.073887			21.59	0.014193	0.012537	0.013493
	36.65	0.05706	0.06744	0.072869			21.62	0.014383	0.012621	0.013633
	36.68	0.056405	0.066671	0.071703			21.65	0.014573	0.012772	0.013811
	36.71	0.05584	0.065734	0.070752			21.68	0.014691	0.012842	0.01392
	36.74	0.05516	0.064941	0.069992			21.71	0.014881	0.012916	0.01408
	36.77	0.054581	0.064187	0.068966			21.74	0.015087	0.012964	0.014234
	36.8	0.053983	0.063331	0.068073			21.77	0.01529	0.013065	0.014401
	36.83	0.053417	0.062708	0.067039			21.8	0.015501	0.013256	0.014554
	36.86	0.052873	0.061831	0.066138			21.83	0.015747	0.013367	0.01471
	36.89	0.052267	0.06106	0.06524			21.86	0.016061	0.013463	0.014903
	36.92	0.051704	0.060314	0.064417			21.89	0.01632	0.013566	0.015108
	36.95	0.051136	0.059518	0.063574			21.92	0.016653	0.013717	0.015351
	36.98	0.050569	0.058814	0.062565			21.95	0.01686	0.013865	0.015634
	37.01	0.050091	0.058037	0.061753			21.98	0.017044	0.01406	0.015806
	37.04	0.049639	0.057507	0.060854			22.01	0.017355	0.014247	0.016056
	37.07	0.049209	0.056912	0.060064			22.04	0.01768	0.014359	0.016345
	37.1	0.048661	0.056234	0.059322			22.07	0.017975	0.014527	0.016707
	37.13	0.048202	0.055645	0.058597			22.1	0.018277	0.014729	0.016998
	37.16	0.047787	0.054949	0.057851			22.13	0.018546	0.014938	0.017247
	37.19	0.047298	0.054357	0.057073			22.16	0.018878	0.015173	0.017563
	37.22	0.046968	0.053779	0.05643			22.19	0.019219	0.015354	0.017807
	37.25	0.046524	0.053266	0.055769			22.22	0.019617	0.0156	0.018245
	37.28	0.046134	0.052748	0.054979			22.25	0.019921	0.015812	0.018594
	37.31	0.045777	0.052112	0.054391			22.28	0.020161	0.016055	0.0189
	37.34	0.045382	0.05159	0.05362			22.31	0.020524	0.016269	0.019289
	37.38	0.045327	0.051002	0.053016			22.32	0.020578	0.016301	0.01935
	37.4	0.045054	0.050516	0.052408			22.34	0.02086	0.016466	0.019674
	37.43	0.04471	0.050156	0.051717			22.37	0.021211	0.0167	0.020067
	37.46	0.044333	0.049668	0.051135			22.4	0.02153	0.016976	0.020448
	37.49	0.043996	0.049265	0.050475			22.43	0.021817	0.01729	0.020851
	37.52	0.043657	0.048789	0.050021			22.46	0.022121	0.017582	0.021307
	37.55	0.043376	0.048432	0.049452			22.49	0.022475	0.017833	0.021675
	37.58	0.043005	0.04808	0.04897			22.52	0.022911	0.018136	0.022162
	37.61	0.042664	0.047707	0.048458			22.55	0.023241	0.018392	0.022565
	37.64	0.042363	0.04734	0.047833			22.58	0.023539	0.018697	0.022925
	37.67	0.042071	0.046941	0.047333			22.61	0.023828	0.018941	0.023409
	37.7	0.041774	0.046632	0.0469			22.64	0.024151	0.019179	0.023816
	37.73	0.041424	0.04624	0.046491			22.67	0.024479	0.01949	0.024356
	37.76	0.04113	0.045877	0.046055			22.7	0.024776	0.019783	0.024822
	37.79	0.040818	0.045817	0.045582			22.73	0.02509	0.020115	0.025337
	37.82	0.040594	0.045547	0.0452			22.76	0.025345	0.02037	0.025686
	37.85	0.040336	0.045202	0.044727			22.79	0.025613	0.020635	0.026084
	37.88	0.040019	0.044853	0.044385			22.82	0.026002	0.020906	0.026627
	37.91	0.039762	0.044497	0.043999			22.85	0.026246	0.021193	0.027074
	37.94	0.039489	0.044204	0.043574			22.88	0.026541	0.021514	0.027605
	37.97	0.039272	0.043914	0.043243			22.91	0.026773	0.021748	0.028035
	38	0.039061	0.043605	0.04288			22.94	0.027028	0.021953	0.028455
	38.03	0.038829	0.043381	0.04254			22.97	0.027269	0.022223	0.028896
	38.06	0.038591	0.043056	0.042199			23	0.02745	0.022454	0.029348
	38.09	0.038342	0.042786	0.041855			23.03	0.027591	0.022711	0.02987
	38.12	0.038139	0.042464	0.041516			23.06	0.027753	0.022939	0.03027
	38.15	0.037965	0.042093	0.041186			23.09	0.027954	0.02315	0.030622
	38.18	0.037759	0.041827	0.040878			23.12	0.02813	0.023368	0.031061
	38.21	0.037611	0.041584	0.040456			23.15	0.028308	0.023594	0.031404
	38.24	0.0374	0.041327	0.040133			23.19	0.028462	0.023894	0.031834
	38.27	0.03725	0.04101	0.03989			23.21	0.028536	0.024094	0.032163
	38.3	0.037082	0.040677	0.039575			23.24	0.028616	0.024305	0.032504
	38.33	0.036928	0.040447	0.0393			23.27	0.028749	0.024465	0.032809
	38.36	0.036739	0.040176	0.038974			23.3	0.02888	0.024621	0.033145
	38.39	0.036584	0.039949	0.038675			23.33	0.028919	0.024838	0.033465
	38.42	0.036466	0.039716	0.03839			23.36	0.028925	0.02503	0.03373
	38.45	0.036306	0.039513	0.038081			23.39	0.028939	0.025196	0.034
	38.48	0.036151	0.039357	0.037871			23.42	0.028958	0.025309	0.034214
	38.51	0.036	0.039204	0.037562			23.45	0.028995	0.025437	0.034435
	38.54	0.03587	0.039002	0.037304			23.48	0.028987	0.025607	0.034644
	38.57	0.035743	0.038732	0.03707			23.51	0.028939	0.025756	0.03476
	38.6	0.035611	0.038534	0.036839			23.54	0.028941	0.025853	0.034852
	38.63	0.035475	0.038353	0.036636			23.57	0.028974	0.025953	0.034967
	38.66	0.035331	0.038206	0.036403			23.6	0.028982	0.026034	0.035069
	38.69	0.035126	0.038051	0.036171			23.63	0.028922	0.026142	0.03517
	38.72	0.034988	0.037824	0.03599			23.66	0.028801	0.02621	0.035182
	38.75	0.03485	0.037625	0.035844			23.69	0.028666	0.026254	0.035166
	38.78	0.034753	0.037475	0.035681			23.72	0.028597	0.026289	0.035126
	38.81	0.03459	0.037337	0.035442			23.75	0.028514	0.02636	0.035091
	38.84	0.034452	0.0372	0.035248			23.78	0.028417	0.026422	0.035064
	38.87	0.034352	0.037001	0.03508			23.81	0.028294	0.026463	0.035004
	38.9	0.034232	0.036833	0.034931			23.84	0.028102	0.026475	0.034831
	38.93	0.034136	0.036661	0.034802			23.87	0.027965	0.026448	0.034679
	38.96	0.034005	0.036539	0.034593			23.9	0.027842	0.026421	0.034553
	38.99	0.033906	0.036438	0.034381			23.93	0.027713	0.026394	0.034471
	39.02	0.033794	0.036258	0.034201			23.96	0.027521	0.026348	0.034301
	39.05	0.033686	0.036078	0.0341			23.99	0.027342	0.026283	0.034043
	39.08	0.033613	0.0359	0.033941			24.02	0.027228	0.02624	0.033806
	39.11	0.033505	0.035783	0.0338			24.05	0.027091	0.026207	0.033565
	39.14	0.033404	0.035646	0.033645			24.08	0.026931	0.026187	0.033362
	39.17	0.033334	0.035461	0.033437			24.11	0.026673	0.02614	0.033142
	39.2	0.033251	0.035275	0.033301			24.14	0.026375	0.026081	0.03279
	39.23	0.03319	0.035109	0.033205			24.17	0.026181	0.026011	0.032496
	39.26	0.033104	0.034988	0.033029			24.2	0.026005	0.025878	0.0322
	39.29	0.03302	0.034894	0.032876			24.23	0.025808	0.025797	0.031937
	39.32	0.032929	0.034723	0.032688			24.26	0.025561	0.025718	0.031642
	39.35	0.032856	0.034534	0.032666			24.29	0.025239	0.025621	0.031307
	39.38	0.032788	0.034401	0.032569			24.32	0.025044	0.025467	0.030958
	39.41	0.032706	0.034293	0.032431			24.35	0.024889	0.025325	0.030565
	39.44	0.03263	0.034198	0.032309			24.38	0.024776	0.025253	0.03026
	39.47	0.032535	0.034073	0.032209			24.41	0.024565	0.025155	0.029934
	39.5	0.032484	0.033968	0.032067			24.44	0.024362	0.025036	0.029621
	39.53	0.032427	0.033854	0.031986			24.47	0.024126	0.024885	0.02928
	39.56	0.032354	0.033802	0.03186			24.5	0.023897	0.02476	0.028968
	39.59	0.032235	0.03373	0.031759			24.53	0.023709	0.024651	0.028682
	39.62	0.032089	0.03363	0.031638			24.56	0.023436	0.024563	0.028314
	39.65	0.032006	0.033486	0.03152			24.59	0.023226	0.024476	0.02798
	39.68	0.031946	0.033366	0.031407			24.62	0.023008	0.024359	0.027637
	39.71	0.031873	0.033305	0.031301			24.65	0.022781	0.024192	0.027287
	39.74	0.031786	0.033251	0.03124			24.68	0.022575	0.024081	0.027042
	39.77	0.031632	0.033183	0.031156			24.71	0.022326	0.023975	0.026736
	39.8	0.031561	0.033104	0.031031			24.74	0.022115	0.023897	0.026456
	39.83	0.031508	0.03298	0.030941			24.77	0.021964	0.023786	0.026173
	39.86	0.031428	0.032902	0.03085			24.8	0.021796	0.023612	0.025878
	39.89	0.031326	0.032866	0.030761			24.83	0.021625	0.023506	0.025634
	39.92	0.031225	0.032822	0.030657			24.86	0.021371	0.023403	0.025314
	39.95	0.031171	0.032747	0.030565			24.89	0.021155	0.023317	0.025079
	39.98	0.031102	0.032598	0.030479			24.92	0.020981	0.023165	0.0248
	40.01	0.031045	0.032471	0.030354			24.95	0.020855	0.023047	0.024503
	40.04	0.030983	0.032389	0.030295			24.98	0.020692	0.022939	0.024297
	40.07	0.030933	0.032351	0.030216			25.01	0.020483	0.022833	0.024051
	40.1	0.030899	0.032233	0.03011			25.04	0.020278	0.022733	0.023826
	40.13	0.030841	0.032132	0.030021			25.07	0.02007	0.022538	0.023604
	40.14	0.030792	0.032011	0.029943			25.1	0.019931	0.022372	0.023342
	40.16	0.030749	0.031941	0.029913			25.13	0.019836	0.022272	0.023176
	40.19	0.030681	0.031889	0.029878			25.16	0.01971	0.022188	0.023027
	40.22	0.030654	0.031757	0.029791			25.19	0.019563	0.022088	0.022851
	40.25	0.03062	0.031657	0.029689			25.22	0.019365	0.021924	0.022591
	40.28	0.030577	0.031581	0.029643			25.25	0.019231	0.021766	0.022405
	40.31	0.030528	0.031535	0.02965			25.28	0.019117	0.021623	0.022237
	40.34	0.030444	0.031502	0.029586			25.31	0.018971	0.021522	0.022097
	40.37	0.030432	0.031394	0.029482			25.34	0.018827	0.021488	0.021943
	40.4	0.030395	0.031291	0.029432			25.37	0.018646	0.021395	0.02169
	40.43	0.030347	0.031198	0.029399			25.4	0.018546	0.021269	0.021484
	40.46	0.030282	0.031134	0.02934			25.43	0.018477	0.021154	0.021331
	40.49	0.03021	0.031102	0.029274			25.46	0.018343	0.021063	0.021204
	40.52	0.030116	0.031026	0.029199			25.49	0.018207	0.020968	0.021058
	40.55	0.030057	0.030936	0.029115			25.52	0.018048	0.020857	0.020841
	40.58	0.030011	0.030834	0.029103			25.55	0.017966	0.020722	0.020668
	40.61	0.029919	0.030823	0.029076			25.58	0.01788	0.020565	0.020511
	40.64	0.029786	0.030822	0.028984			25.61	0.017774	0.020457	0.020386
	40.67	0.029731	0.030809	0.028923			25.64	0.017631	0.020356	0.02028
	40.7	0.02971	0.030769	0.028842			25.67	0.017462	0.020262	0.020099
	40.73	0.029699	0.030654	0.028788			25.7	0.017368	0.020196	0.019953
	40.76	0.029646	0.030592	0.028752			25.73	0.017344	0.020067	0.019806
	40.79	0.029583	0.030596	0.02872			25.76	0.017274	0.019985	0.019733
	40.82	0.029482	0.030544	0.028668			25.79	0.017155	0.019901	0.019623
	40.85	0.029464	0.030509	0.028576			25.82	0.016979	0.019788	0.01942
	40.88	0.029459	0.030449	0.028497			25.85	0.016879	0.019663	0.019282
	40.91	0.029443	0.030379	0.028467			25.88	0.016848	0.019501	0.019124
	40.94	0.029436	0.030341	0.028416			25.89	0.016845	0.019485	0.019103
	40.97	0.029428	0.030338	0.02834			25.91	0.01681	0.019438	0.019038
	41	0.02934	0.030297	0.028222			25.94	0.016722	0.019382	0.018913
	41.03	0.029275	0.03021	0.028148			25.97	0.016578	0.019266	0.018738
	41.06	0.029248	0.030156	0.028121			26	0.016478	0.019173	0.018597
	41.09	0.029226	0.030114	0.02811			26.03	0.016408	0.019044	0.018489
	41.12	0.029166	0.030097	0.028137			26.06	0.016388	0.018927	0.018404
	41.15	0.029148	0.030038	0.028083			26.09	0.016351	0.018838	0.018331
	41.18	0.029156	0.029922	0.027984			26.12	0.016282	0.018745	0.018193
	41.21	0.029179	0.029859	0.02793			26.15	0.016201	0.018668	0.018036
	41.24	0.02916	0.029843	0.027915			26.18	0.016145	0.018543	0.017887
	41.27	0.029088	0.029808	0.027896			26.21	0.016096	0.018442	0.01781
	41.3	0.029026	0.029775	0.027843			26.24	0.016026	0.018353	0.01776
	41.33	0.028972	0.029713	0.027797			26.27	0.015906	0.018266	0.01766
	41.36	0.028971	0.029704	0.027786			26.3	0.015831	0.018201	0.017541
	41.39	0.028961	0.029653	0.027745			26.33	0.015801	0.018097	0.017412
	41.42	0.028879	0.029578	0.027674			26.36	0.015803	0.017985	0.017327
	41.45	0.028773	0.029539	0.027629			26.39	0.015806	0.017907	0.017236
	41.48	0.028741	0.029535	0.027613			26.42	0.015749	0.017888	0.017179
	41.51	0.028717	0.029509	0.02757			26.45	0.015661	0.017847	0.017071
	41.54	0.028703	0.029499	0.027526			26.48	0.015606	0.017753	0.016978
	41.57	0.028663	0.02951	0.027467			26.51	0.015587	0.017658	0.016895
	41.61	0.028627	0.029488	0.027401			26.54	0.015582	0.017606	0.016841
	41.63	0.028573	0.029409	0.027352			26.57	0.015517	0.017577	0.016781
	41.66	0.02853	0.029329	0.027342			26.6	0.015443	0.017447	0.016665
	41.69	0.028501	0.029275	0.027337			26.63	0.015363	0.017368	0.016577
	41.72	0.028471	0.029261	0.027282			26.66	0.015344	0.017282	0.01655
	41.75	0.028444	0.029296	0.027222			26.69	0.015339	0.01719	0.016512
	41.78	0.028405	0.029277	0.02715			26.72	0.0153	0.017168	0.016459
	41.81	0.028381	0.029177	0.027111			26.75	0.015238	0.017136	0.016342
	41.84	0.028332	0.029093	0.027133			26.78	0.015235	0.01707	0.016253
	41.87	0.028265	0.02906	0.02713			26.81	0.015271	0.01697	0.016201
	41.9	0.028197	0.029049	0.027077			26.85	0.015284	0.016891	0.016139
	41.93	0.028162	0.029041	0.027017			26.87	0.015214	0.016854	0.01609
	41.96	0.028151	0.028984	0.026936			26.9	0.015103	0.016838	0.016033
	41.99	0.028167	0.02889	0.026906			26.93	0.015041	0.016765	0.016001
	42.02	0.028178	0.02883	0.026904			26.96	0.015043	0.016667	0.015945
	42.05	0.02817	0.028822	0.026896			26.99	0.015075	0.016594	0.015899
	42.08	0.028138	0.028804	0.026855			27.02	0.015051	0.016577	0.015871
	42.11	0.028141	0.028749	0.026841			27.05	0.01501	0.016535	0.015806
	42.14	0.02817	0.028646	0.026857			27.08	0.014995	0.016453	0.015771
	42.17	0.028172	0.028592	0.026825			27.11	0.015013	0.01637	0.015765
	42.2	0.028124	0.02857	0.026757			27.14	0.015057	0.016307	0.015771
	42.23	0.028065	0.028546	0.026662			27.17	0.015062	0.016297	0.015771
	42.26	0.028015	0.028528	0.026613			27.2	0.014994	0.016291	0.015695
	42.29	0.027962	0.028506	0.026624			27.23	0.014968	0.016224	0.015606
	42.32	0.027951	0.028516	0.026633			27.26	0.015013	0.016145	0.015568
	42.35	0.027919	0.028539	0.026625			27.29	0.01504	0.016079	0.015552
	42.38	0.027894	0.028517	0.026586			27.32	0.015	0.016042	0.01556
	42.41	0.027891	0.028433	0.026579			27.35	0.014875	0.016045	0.015519
	42.44	0.0279	0.028344	0.0266			27.38	0.014815	0.016004	0.015481
	42.47	0.02793	0.028294	0.026552			27.41	0.014803	0.015895	0.015466
	42.5	0.027929	0.0283	0.026482			27.44	0.014816	0.015841	0.015489
	42.53	0.027881	0.028287	0.026419			27.47	0.014813	0.015831	0.015528
	42.56	0.027888	0.028248	0.026367			27.5	0.014778	0.01582	0.015503
	42.59	0.027924	0.028243	0.02636			27.53	0.014727	0.015787	0.015424
	42.62	0.027923	0.028259	0.026381			27.56	0.014753	0.015749	0.015354
	42.65	0.027908	0.02827	0.026354			27.59	0.014805	0.015734	0.01532
	42.68	0.027884	0.028283	0.026325			27.62	0.014799	0.01576	0.015308
	42.71	0.027875	0.028273	0.026313			27.65	0.014773	0.015755	0.015279
	42.74	0.0279	0.028244	0.026299			27.68	0.014738	0.015684	0.015246
	42.77	0.027961	0.028218	0.026218			27.71	0.014749	0.015588	0.015244
	42.8	0.028024	0.028157	0.026183			27.74	0.014765	0.015535	0.015247
	42.83	0.028054	0.028107	0.026137			27.77	0.014803	0.015528	0.015265
	42.86	0.028103	0.028064	0.026092			27.81	0.01477	0.015549	0.015271
	42.89	0.028141	0.02803	0.026092			27.83	0.014726	0.015544	0.015246
	42.92	0.028187	0.028008	0.026097			27.86	0.014769	0.015501	0.015233
	42.95	0.028235	0.028015	0.026105			27.89	0.014865	0.01547	0.015244
	42.98	0.028286	0.028032	0.026096			27.92	0.014962	0.015501	0.015268
	43.01	0.0283	0.028007	0.026078			27.95	0.014972	0.015536	0.01529
	43.04	0.028341	0.027943	0.026064			27.98	0.014968	0.015531	0.015273
	43.07	0.028432	0.02787	0.026059			28.01	0.014989	0.015523	0.015238
	43.1	0.028516	0.027821	0.026097			28.04	0.015021	0.01549	0.015251
	43.13	0.02857	0.02781	0.026111			28.07	0.01506	0.015503	0.015284
	43.16	0.028638	0.027786	0.026105			28.1	0.015024	0.015538	0.0153
	43.19	0.028723	0.027769	0.02608			28.13	0.014989	0.015531	0.015263
	43.22	0.028819	0.027762	0.026075			28.16	0.014983	0.015503	0.015221
	43.25	0.028936	0.027756	0.026084			28.19	0.015016	0.015495	0.015213
	43.28	0.02902	0.027777	0.026088			28.22	0.015037	0.015479	0.015278
	43.31	0.029076	0.027778	0.026062			28.25	0.015025	0.015496	0.015349
	43.34	0.029155	0.027778	0.025997			28.28	0.014975	0.015536	0.015412
	43.37	0.029298	0.027754	0.02591			28.31	0.014972	0.015531	0.015433
	43.4	0.029345	0.02775	0.025885			28.34	0.015013	0.015495	0.015452
	43.43	0.029431	0.027775	0.025915			28.37	0.015059	0.015481	0.015501
	43.46	0.029501	0.027785	0.025869			28.4	0.015035	0.015496	0.015517
	43.49	0.0296	0.027759	0.025842			28.43	0.014991	0.015523	0.015514
	43.52	0.029734	0.027735	0.025827			28.46	0.014976	0.015519	0.015479
	43.55	0.029821	0.027748	0.025851			28.49	0.015032	0.015503	0.015458
	43.58	0.029876	0.027819	0.025864			28.52	0.015124	0.01547	0.015493
	43.61	0.029922	0.027878	0.025866			28.55	0.015187	0.015517	0.015516
	43.64	0.030021	0.027902	0.025847			28.58	0.015201	0.015546	0.015538
	43.67	0.030121	0.027937	0.025823			28.61	0.015209	0.015525	0.015558
	43.67	0.030203	0.02798	0.025845			28.64	0.015235	0.015489	0.015614
	43.7	0.030295	0.028015	0.02585			28.67	0.015282	0.015489	0.015696
	43.73	0.030395	0.02803	0.025834			28.7	0.015293	0.015512	0.01575
	43.76	0.030468	0.028018	0.025847			28.73	0.015301	0.015531	0.015766
	43.79	0.030566	0.028041	0.025826			28.76	0.015332	0.015522	0.015739
	43.82	0.030638	0.028116	0.025821			28.79	0.015412	0.015495	0.01573
	43.85	0.030679	0.028189	0.025867			28.82	0.01549	0.015473	0.015803
	43.88	0.030739	0.028243	0.025859			28.85	0.015557	0.015473	0.015887
	43.91	0.030801	0.028278	0.02582			28.88	0.015581	0.015535	0.015939
	43.94	0.030871	0.02831	0.025823			28.91	0.015628	0.015538	0.015945
	43.97	0.030969	0.02839	0.025826			28.94	0.015709	0.015517	0.015964
	44	0.031041	0.028492	0.025848			28.97	0.015839	0.01553	0.01606
	44.03	0.031087	0.028585	0.025894			29	0.015915	0.015612	0.016155
	44.06	0.031152	0.028663	0.025915			29.03	0.015952	0.015696	0.016221
	44.09	0.031213	0.028744	0.025958			29.06	0.016007	0.015744	0.016218
	44.12	0.031324	0.028854	0.026026			29.09	0.01612	0.015744	0.016264
	44.15	0.031367	0.028947	0.0261			29.12	0.016251	0.015722	0.01635
	44.18	0.031389	0.029106	0.026107			29.15	0.016351	0.015741	0.01644
	44.21	0.031375	0.029225	0.026103			29.18	0.016483	0.015791	0.016531
	44.24	0.031413	0.029334	0.026121			29.21	0.016545	0.015857	0.016592
	44.27	0.031469	0.029407	0.026194			29.24	0.016642	0.015918	0.016624
	44.3	0.031513	0.029555	0.026291			29.27	0.016824	0.015931	0.016711
	44.33	0.031558	0.029716	0.026379			29.3	0.017009	0.015971	0.016814
	44.36	0.031592	0.029823	0.026443			29.33	0.017201	0.016086	0.016932
	44.39	0.031624	0.029962	0.02649			29.36	0.017325	0.016164	0.017025
	44.42	0.031681	0.030068	0.026554			29.39	0.017462	0.016204	0.017181
	44.45	0.031691	0.030222	0.026659			29.42	0.017652	0.016242	0.017331
	44.48	0.031665	0.030425	0.026746			29.45	0.017882	0.016332	0.017488
	44.51	0.031665	0.030587	0.026792			29.45	0.01792	0.016354	0.017525
	44.54	0.031631	0.030695	0.026858			29.48	0.018117	0.016459	0.017693
	44.57	0.031629	0.030801	0.026952			29.51	0.018283	0.016519	0.017826
	44.6	0.031657	0.030926	0.027088			29.54	0.018513	0.016575	0.018015
	44.63	0.031667	0.031117	0.027206			29.57	0.018754	0.016621	0.018216
	44.66	0.031638	0.031277	0.027306			29.6	0.019135	0.016778	0.018462
	44.69	0.031642	0.031408	0.02738			29.63	0.019428	0.016944	0.018754
	44.72	0.031642	0.0315	0.027493			29.66	0.019658	0.017095	0.019003
	44.75	0.031672	0.031684	0.027647			29.69	0.01994	0.017263	0.01925
	44.78	0.031691	0.031846	0.027843			29.72	0.020259	0.017395	0.019553
	44.81	0.031643	0.032	0.027959			29.75	0.020665	0.017577	0.019969
	44.84	0.031637	0.032163	0.028056			29.78	0.020903	0.017802	0.020302
	44.87	0.031648	0.032286	0.028254			29.81	0.02116	0.018055	0.02064
	44.9	0.031684	0.032462	0.0284			29.84	0.021488	0.018299	0.021032
	44.93	0.031683	0.03249	0.028555			29.87	0.021855	0.018492	0.021445
	44.96	0.031657	0.032631	0.028749			29.9	0.022322	0.018745	0.021866
	44.99	0.031637	0.032788	0.028877			29.93	0.022692	0.019009	0.022383
	45.02	0.031635	0.032912	0.029001			29.96	0.022954	0.019224	0.022886
	45.05	0.031681	0.032999	0.029166			29.99	0.023345	0.019531	0.023485
	45.08	0.031686	0.033155	0.029323			30.02	0.023744	0.01981	0.023991
	45.11	0.031664	0.033326	0.029496			30.05	0.024215	0.020132	0.02464
	45.14	0.031637	0.033489	0.029627			30.08	0.024579	0.020454	0.025125
	45.17	0.031596	0.033611	0.029796			30.11	0.02493	0.020835	0.025694
	45.2	0.031539	0.033688	0.029908			30.14	0.025371	0.02109	0.02636
	45.23	0.031505	0.033784	0.030087			30.17	0.025705	0.021393	0.026928
	45.26	0.031439	0.033883	0.030249			30.2	0.026175	0.021771	0.027624
	45.29	0.031423	0.034	0.030373			30.23	0.026554	0.022145	0.028271
	45.32	0.031404	0.034127	0.03052			30.26	0.026963	0.022622	0.028928
	45.35	0.031404	0.034174	0.030685			30.29	0.027329	0.022979	0.029558
	45.38	0.031397	0.034225	0.030899			30.32	0.027723	0.02325	0.030179
	45.41	0.031337	0.034331	0.031022			30.35	0.028141	0.023685	0.030963
	45.44	0.031255	0.034441	0.031137			30.38	0.028547	0.024111	0.031707
	45.47	0.031175	0.034511	0.031256			30.41	0.028925	0.02463	0.032565
	45.5	0.031186	0.034525	0.031364			30.44	0.029242	0.025023	0.03325
	45.53	0.031188	0.034569	0.031513			30.47	0.02958	0.025369	0.033814
	45.56	0.031169	0.03465	0.031645			30.5	0.030024	0.025796	0.034595
	45.59	0.031115	0.034741	0.031716			30.53	0.030392	0.026137	0.03528
	45.62	0.031042	0.034779	0.031819			30.56	0.030677	0.026659	0.036062
	45.65	0.030998	0.034745	0.031919			30.59	0.030971	0.027107	0.036698
	45.68	0.030976	0.034731	0.032025			30.62	0.031274	0.027509	0.037335
	45.71	0.030952	0.03475	0.032127			30.65	0.031638	0.027934	0.037998
	45.74	0.030933	0.034779	0.032209			30.68	0.031924	0.028297	0.038666
	45.77	0.030926	0.034796	0.032238			30.71	0.032249	0.02872	0.039383
	45.8	0.030939	0.034791	0.032276			30.74	0.032449	0.029144	0.039935
	45.83	0.030925	0.034747	0.032365			30.77	0.032782	0.029623	0.040475
	45.86	0.030857	0.034779	0.03246			30.8	0.033033	0.029994	0.041123
	45.89	0.030771	0.034795	0.032523			30.83	0.03331	0.030368	0.041697
	45.92	0.030692	0.034788	0.032536			30.86	0.033554	0.030833	0.042222
	45.95	0.030657	0.034771	0.03256			30.89	0.033695	0.03122	0.042691
	45.98	0.030674	0.034737	0.032595			30.92	0.03384	0.031558	0.043199
	46.01	0.030642	0.034731	0.032619			30.95	0.034027	0.031894	0.043636
	46.04	0.030547	0.034677	0.032615			30.98	0.034227	0.032219	0.044074
	46.07	0.03047	0.034607	0.032607			31.01	0.034366	0.032641	0.044539
	46.1	0.030444	0.034576	0.032596			31.04	0.034452	0.032994	0.04484
	46.13	0.03043	0.03453	0.032601			31.07	0.034557	0.033362	0.045189
	46.16	0.030428	0.034506	0.032609			31.1	0.034709	0.03361	0.045463
	46.19	0.030405	0.034452	0.032525			31.13	0.034825	0.033895	0.045731
	46.23	0.030316	0.034406	0.032439			31.16	0.034913	0.034224	0.04605
	46.25	0.030257	0.034327	0.032397			31.19	0.03492	0.034481	0.046266
	46.28	0.030219	0.034238	0.032371			31.22	0.034926	0.034733	0.046424
	46.31	0.030211	0.034182	0.032316			31.25	0.034996	0.034933	0.046581
	46.34	0.030151	0.034119	0.032216			31.28	0.035104	0.035139	0.046737
	46.37	0.030051	0.034068	0.032151			31.31	0.035159	0.035359	0.046894
	46.4	0.029989	0.033943	0.032059			31.34	0.035115	0.035548	0.047014
	46.43	0.02994	0.033848	0.032006			31.37	0.035021	0.035743	0.047095
	46.46	0.029946	0.033778	0.032			31.4	0.035017	0.035871	0.047135
	46.49	0.029921	0.033734	0.031968			31.43	0.035026	0.036028	0.047176
	46.52	0.029859	0.033676	0.031894			31.46	0.035007	0.036182	0.047186
	46.55	0.029821	0.033581	0.031748			31.49	0.034963	0.036301	0.047156
	46.58	0.029754	0.033491	0.031661			31.52	0.034887	0.036401	0.047062
	46.61	0.029729	0.033374	0.031618			31.55	0.034817	0.036447	0.046989
	46.64	0.029681	0.033315	0.031566			31.58	0.034798	0.03653	0.04691
	46.67	0.029653	0.033275	0.031489			31.61	0.034741	0.03662	0.046834
	46.7	0.029643	0.033191	0.031418			31.64	0.034652	0.036701	0.046726
	46.73	0.029642	0.033085	0.031324			31.67	0.034506	0.036717	0.046572
	46.76	0.029627	0.032985	0.03125			31.7	0.034415	0.03672	0.046393
	46.79	0.029562	0.032937	0.031199			31.73	0.034355	0.036709	0.046188
	46.82	0.029482	0.032904	0.031142			31.76	0.034316	0.036701	0.04603
	46.85	0.029428	0.032818	0.03105			31.79	0.034212	0.036736	0.045834
	46.88	0.029412	0.032733	0.030941			31.82	0.034078	0.03675	0.045608
	46.91	0.029424	0.032644	0.03086			31.85	0.033967	0.036733	0.04536
	46.94	0.029428	0.032585	0.030776			31.88	0.033879	0.036707	0.045103
	46.97	0.029345	0.032542	0.030728			31.91	0.033838	0.036699	0.044911
	47	0.029247	0.032443	0.030668			31.94	0.033729	0.036737	0.044707
	47.03	0.02922	0.032366	0.030544			31.97	0.033608	0.036748	0.044425
	47.06	0.029204	0.032303	0.030449			32	0.033516	0.036715	0.044215
	47.09	0.029204	0.032244	0.030395			32.03	0.033424	0.036633	0.043942
	47.12	0.029155	0.032197	0.030346			32.06	0.033367	0.03658	0.043765
	47.15	0.029126	0.032135	0.030284			32.09	0.033288	0.03653	0.043524
	47.18	0.029114	0.03206	0.030171			32.12	0.033174	0.036523	0.043284
	47.21	0.029074	0.031956	0.030081			32.15	0.033079	0.036441	0.043053
	47.24	0.029036	0.03187	0.030008			32.18	0.033044	0.036331	0.042799
	47.25	0.028965	0.031837	0.029943			32.21	0.033063	0.036289	0.042636
	47.27	0.028914	0.03184	0.029867			32.24	0.033039	0.03623	0.042407
	47.3	0.028899	0.031759	0.02975			32.27	0.032947	0.036154	0.042191
	47.33	0.028911	0.031627	0.029685			32.3	0.032861	0.036065	0.041933
	47.36	0.028885	0.031567	0.029667			32.33	0.032823	0.035973	0.041711
	47.39	0.028801	0.03154	0.029651			32.36	0.032814	0.035892	0.041594
	47.42	0.028714	0.031534	0.029577			32.39	0.032809	0.035843	0.04146
	47.45	0.028682	0.031443	0.029464			32.42	0.03275	0.035794	0.041291
	47.48	0.028706	0.031336	0.029386			32.45	0.032704	0.035711	0.041124
	47.51	0.028692	0.031294	0.029371			32.48	0.032717	0.035595	0.040947
	47.54	0.028668	0.03129	0.029337			32.51	0.03275	0.035524	0.040831
	47.57	0.028635	0.031248	0.02928			32.54	0.032763	0.035511	0.040723
	47.6	0.028617	0.03116	0.029175			32.57	0.032757	0.035478	0.040647
	47.63	0.028585	0.031082	0.029128			32.6	0.032782	0.035381	0.040499
	47.66	0.02853	0.031044	0.029112			32.63	0.032847	0.035324	0.040358
	47.69	0.028478	0.031053	0.029117			32.66	0.032909	0.035258	0.040314
	47.72	0.02843	0.031066	0.029117			32.69	0.033021	0.03525	0.040292
	47.75	0.028402	0.031012	0.029087			32.72	0.033093	0.035248	0.040274
	47.78	0.028406	0.030915	0.029031			32.75	0.033123	0.035235	0.040226
	47.81	0.028419	0.030849	0.028965			32.78	0.03319	0.035142	0.040206
	47.84	0.028421	0.03083	0.028933			32.81	0.033318	0.035061	0.040209
	47.87	0.028382	0.030844	0.028888			32.84	0.033453	0.035028	0.04023
	47.9	0.028379	0.030811	0.028849			32.87	0.033537	0.035028	0.040244
	47.93	0.028398	0.030758	0.028801			32.9	0.033657	0.035072	0.040223
	47.96	0.028414	0.030679	0.028749			32.93	0.03383	0.035097	0.04026
	47.99	0.028411	0.030623	0.028717			32.96	0.03403	0.035136	0.04033
	48.02	0.028392	0.030627	0.02867			32.99	0.034222	0.035175	0.040471
	48.05	0.028389	0.030581	0.028622			33	0.034247	0.035185	0.04049
	48.08	0.028336	0.030535	0.028584			33.02	0.034366	0.035215	0.040574
	48.11	0.028257	0.030498	0.028574			33.05	0.034482	0.035254	0.040659
	48.14	0.028214	0.030471	0.028574			33.08	0.034645	0.035269	0.040786
	48.17	0.028181	0.03042	0.028562			33.11	0.034928	0.035342	0.040948
	48.2	0.02814	0.030368	0.028462			33.14	0.035215	0.035413	0.041196
	48.23	0.028118	0.030295	0.028403			33.17	0.0355	0.035522	0.041403
	48.26	0.028149	0.030275	0.028373			33.2	0.035786	0.03564	0.041635
	48.29	0.028156	0.030286	0.028362			33.23	0.035989	0.035716	0.041822
	48.32	0.028149	0.03029	0.028384			33.26	0.036365	0.0358	0.042092
	48.35	0.028124	0.030297	0.028352			33.29	0.036695	0.035917	0.042356
	48.38	0.02807	0.030295	0.028267			33.32	0.036988	0.036086	0.042689
	48.41	0.028026	0.030194	0.028197			33.35	0.0373	0.036303	0.042981
	48.44	0.027991	0.030125	0.028151			33.38	0.037605	0.03646	0.043292
	48.47	0.027964	0.030122	0.028148			33.41	0.038054	0.036587	0.04367
	48.5	0.027915	0.030098	0.02813			33.44	0.03838	0.036728	0.04403
	48.53	0.027889	0.03006	0.02807			33.47	0.038739	0.036929	0.044445
	48.56	0.027886	0.030019	0.028045			33.5	0.039146	0.037243	0.044899
	48.59	0.027905	0.029992	0.028053			33.53	0.039525	0.037502	0.045241
	48.62	0.027908	0.030007	0.028016			33.56	0.040057	0.03777	0.045735
	48.65	0.027894	0.030029	0.027946			33.59	0.040528	0.037989	0.046187
	48.68	0.027862	0.029981	0.027877			33.62	0.040893	0.038322	0.046659
	48.71	0.027878	0.02988	0.027838			33.65	0.041372	0.038642	0.047213
	48.74	0.027908	0.029815	0.02785			33.68	0.041812	0.038926	0.047712
	48.77	0.027902	0.02978	0.027869			33.71	0.042423	0.039261	0.04831
	48.8	0.027856	0.029772	0.027867			33.74	0.042991	0.039587	0.048772
	48.83	0.027762	0.029803	0.027827			33.78	0.043624	0.040033	0.049431
	48.86	0.027713	0.029792	0.027799			33.8	0.044136	0.040368	0.050002
	48.89	0.027693	0.029719	0.027837			33.83	0.044597	0.040769	0.050597
	48.92	0.027672	0.029642	0.027867			33.86	0.045298	0.041229	0.051301
	48.95	0.027664	0.029604	0.027835			33.89	0.045987	0.041633	0.051972
	48.98	0.027643	0.029591	0.027818			33.92	0.046761	0.04218	0.052735
	49.01	0.027623	0.029567	0.027783			33.95	0.047436	0.042693	0.053514
	49.04	0.027637	0.029513	0.027761			33.98	0.048112	0.043115	0.05427
	49.07	0.027666	0.029504	0.02771			34.01	0.048838	0.043673	0.055158
	49.1	0.027666	0.029507	0.027675			34.04	0.049627	0.044144	0.055975
	49.13	0.027632	0.029477	0.027637			34.07	0.050538	0.044753	0.056992
	49.16	0.02762	0.029409	0.027593			34.1	0.051325	0.045325	0.057905
	49.19	0.027647	0.029344	0.02758			34.13	0.05218	0.045904	0.058682
	49.22	0.027669	0.029294	0.027631			34.16	0.053293	0.046575	0.059839
	49.25	0.027659	0.029285	0.027613			34.19	0.054343	0.047079	0.060915
	49.28	0.027623	0.02929	0.027551			34.22	0.055445	0.04782	0.062191
	49.31	0.027624	0.029285	0.027483			34.25	0.056565	0.048504	0.063271
	49.34	0.027653	0.029271	0.02741			34.28	0.057962	0.049282	0.064376
	49.37	0.027669	0.029269	0.027398			34.31	0.059285	0.049972	0.065562
	49.4	0.027737	0.029277	0.027393			34.34	0.060758	0.05067	0.066849
	49.43	0.027773	0.029283	0.027385			34.37	0.062616	0.05143	0.068447
	49.46	0.027804	0.029288	0.027339			34.4	0.064067	0.052237	0.069909
	49.49	0.027859	0.029266	0.027318			34.43	0.066257	0.053219	0.071668
	49.52	0.027916	0.029247	0.027348			34.46	0.06836	0.054051	0.073243
	49.55	0.027997	0.029215	0.027361			34.49	0.070691	0.054906	0.074946
	49.58	0.028068	0.029172	0.027356			34.52	0.073687	0.055997	0.076767
	49.61	0.028118	0.029117	0.02731			34.55	0.076545	0.056855	0.078689
	49.64	0.028216	0.029047	0.027244			34.58	0.0797	0.058099	0.081016
	49.67	0.028338	0.029022	0.027183			34.61	0.083194	0.05923	0.083103
	49.7	0.028438	0.029023	0.027171			34.64	0.087054	0.060394	0.085369
	49.73	0.02853	0.029028	0.027142			34.67	0.091972	0.061877	0.088272
	49.76	0.028619	0.029026	0.027095			34.7	0.096557	0.063258	0.09054
	49.79	0.028752	0.029033	0.027077			34.74	0.102309	0.065025	0.093923
	49.82	0.028874	0.029009	0.02708			34.76	0.107673	0.066355	0.09705
	49.85	0.02903	0.028985	0.027106			34.79	0.112451	0.068311	0.100477
	49.88	0.029196	0.029014	0.027125			34.82	0.119569	0.070152	0.10491
	49.91	0.029293	0.029057	0.027068			34.85	0.125984	0.072119	0.109084
	49.94	0.029439	0.029034	0.027063			34.88	0.133824	0.074645	0.113576
	49.97	0.029604	0.029025	0.027104			34.91	0.140878	0.076984	0.118372
	50	0.029794	0.028998	0.027118			34.94	0.149493	0.079474	0.124462
	50.03	0.029953	0.029001	0.02712			34.97	0.155858	0.082174	0.13021
	50.06	0.030079	0.029028	0.027114			35	0.163653	0.085079	0.136431
	50.09	0.0303	0.029031	0.027047			35.03	0.172847	0.088667	0.144279
	50.12	0.030539	0.028995	0.026969			35.06	0.180796	0.091934	0.151511
	50.15	0.030727	0.028991	0.026906			35.09	0.190175	0.096003	0.15923
	50.18	0.030871	0.028999	0.026876			35.12	0.19824	0.099759	0.167499
	50.21	0.031017	0.029036	0.026862			35.15	0.206207	0.103085	0.176249
	50.24	0.031212	0.029037	0.026854			35.18	0.214075	0.107976	0.186814
	50.27	0.031378	0.028999	0.026827			35.21	0.221799	0.112372	0.196135
	50.3	0.031575	0.028988	0.02683			35.24	0.23065	0.117725	0.207381
	50.33	0.031691	0.028996	0.026862			35.27	0.238082	0.122522	0.21568
	50.36	0.031849	0.029022	0.026879			35.3	0.245271	0.127575	0.225908
	50.39	0.032043	0.029028	0.026804			35.33	0.253216	0.132438	0.238044
	50.42	0.032224	0.029036	0.026731			35.36	0.25863	0.138369	0.248491
	50.46	0.032441	0.029058	0.02667			35.39	0.265849	0.144967	0.260741
	50.48	0.032603	0.029133	0.026657			35.42	0.27167	0.150808	0.271227
	50.51	0.032763	0.029233	0.026651			35.45	0.278026	0.157878	0.281601
	50.54	0.032909	0.029288	0.026619			35.48	0.28303	0.164124	0.291767
	50.57	0.033061	0.029367	0.02657			35.51	0.287653	0.170447	0.301608
	50.6	0.033232	0.029434	0.026586			35.54	0.29187	0.176815	0.312686
	50.63	0.033345	0.029572	0.026613			35.57	0.295735	0.183251	0.321869
	50.66	0.0335	0.029697	0.02666			35.6	0.299759	0.190857	0.332181
	50.69	0.033635	0.029843	0.026724			35.63	0.302768	0.197336	0.340561
	50.72	0.033764	0.029943	0.026749			35.66	0.305335	0.203733	0.347171
	50.75	0.033943	0.030029	0.026781			35.69	0.307892	0.211024	0.355934
	50.78	0.034051	0.030213	0.02683			35.72	0.309716	0.216123	0.363023
	50.81	0.034176	0.030365	0.026847			35.75	0.311192	0.223174	0.370761
	50.82	0.034239	0.030541	0.026835			35.78	0.312301	0.229068	0.376865
	50.84	0.034328	0.030715	0.026816			35.81	0.313076	0.234744	0.382434
	50.87	0.03443	0.03086	0.026838			35.84	0.313616	0.241037	0.387482
	50.9	0.034523	0.031072	0.026858			35.87	0.313773	0.246153	0.392037
	50.93	0.034626	0.03132	0.02693			35.9	0.313557	0.25097	0.396766
	50.96	0.034698	0.031564	0.026988			35.93	0.313159	0.255496	0.400273
	50.99	0.034783	0.031799	0.027019			35.96	0.312431	0.260395	0.403275
	51.02	0.034894	0.031987	0.027019			35.99	0.311321	0.264255	0.406225
	51.05	0.034993	0.032232	0.027071			36.02	0.310191	0.267818	0.408353
	51.08	0.03504	0.032501	0.02715			36.05	0.308718	0.271622	0.410074
	51.11	0.035077	0.032818	0.027206			36.08	0.307254	0.274602	0.411344
	51.14	0.03512	0.033151	0.027258			36.11	0.305348	0.277329	0.412234
	51.17	0.035169	0.033404	0.027304			36.14	0.303898	0.279749	0.412504
	51.2	0.035231	0.033729	0.02739			36.17	0.302109	0.281926	0.412407
	51.23	0.035285	0.034057	0.027488			36.2	0.299875	0.284188	0.411904
	51.26	0.0353	0.034354	0.027547			36.23	0.297854	0.285913	0.411322
	51.29	0.035358	0.034652	0.027613			36.26	0.295233	0.287636	0.410136
	51.32	0.035386	0.034944	0.027694			36.29	0.292836	0.288695	0.408729
	51.35	0.035404	0.035299	0.02781			36.32	0.291055	0.289772	0.406985
	51.38	0.035421	0.035613	0.027946			36.35	0.287923	0.290757	0.404637
	51.41	0.035388	0.035978	0.028065			36.38	0.285387	0.291406	0.402357
	51.44	0.035373	0.036287	0.028189			36.41	0.282342	0.29198	0.399415
	51.47	0.035402	0.03652	0.02836			36.44	0.279641	0.292322	0.397139
	51.5	0.035416	0.036863	0.028543			36.47	0.276911	0.292506	0.394286
	51.53	0.0354	0.03718	0.028739			36.5	0.274171	0.292487	0.390805
	51.56	0.035388	0.037545	0.028874			36.53	0.271402	0.292251	0.387725
	51.59	0.035377	0.037878	0.029045			36.56	0.268022	0.291774	0.383958
	51.62	0.035383	0.038163	0.029201			36.57	0.267527	0.291686	0.383406
	51.65	0.035389	0.038428	0.029424			36.59	0.265047	0.291174	0.380653
	51.68	0.035399	0.038687	0.029705			36.62	0.261504	0.290294	0.377838
	51.71	0.035388	0.038991	0.029934			36.65	0.258394	0.28941	0.373876
	51.74	0.035367	0.039208	0.030143			36.68	0.255206	0.288646	0.370441
	51.77	0.035361	0.039459	0.030311			36.71	0.251963	0.287442	0.366339
	51.8	0.035354	0.039689	0.030549			36.74	0.248627	0.286251	0.362706
	51.83	0.035321	0.039917	0.030888			36.77	0.244735	0.284673	0.358432
	51.86	0.03528	0.040111	0.031158			36.8	0.241446	0.283217	0.354768
	51.89	0.035228	0.040295	0.031467			36.83	0.238149	0.281685	0.351744
	51.92	0.03517	0.040456	0.031719			36.86	0.234241	0.280128	0.347478
	51.95	0.035175	0.040564	0.031929			36.89	0.231413	0.278486	0.343793
	51.98	0.035182	0.040685	0.032259			36.92	0.227471	0.276385	0.339433
	52.01	0.035131	0.040848	0.032588			36.95	0.224173	0.274512	0.335713
	52.04	0.035026	0.040874	0.032912			36.98	0.220909	0.272604	0.33204
	52.07	0.034966	0.040945	0.033142			37.01	0.217113	0.270369	0.328327
	52.1	0.034952	0.041053	0.033396			37.04	0.213865	0.26849	0.3246
	52.13	0.034952	0.041094	0.033684			37.07	0.210099	0.266577	0.320204
	52.16	0.03492	0.041151	0.033994			37.1	0.20747	0.264573	0.316451
	52.19	0.034839	0.041218	0.034285			37.13	0.204387	0.262246	0.312692
	52.22	0.034752	0.041249	0.034512			37.16	0.200807	0.260195	0.30822
	52.25	0.034704	0.041256	0.034787			37.19	0.197769	0.258081	0.30501
	52.28	0.034645	0.041235	0.035101			37.22	0.194302	0.255552	0.300503
	52.31	0.034582	0.041222	0.035397			37.25	0.191455	0.253736	0.296655
	52.34	0.034474	0.041262	0.035665			37.28	0.188667	0.251219	0.29217
	52.37	0.034431	0.041291	0.035881			37.31	0.185877	0.249044	0.288307
	52.4	0.034384	0.041226	0.036087			37.34	0.183122	0.24681	0.284419
	52.43	0.034324	0.041123	0.036266			37.37	0.179863	0.244187	0.27985
	52.46	0.034279	0.041064	0.036438			37.4	0.177162	0.241865	0.276632
	52.49	0.034217	0.041016	0.036663			37.43	0.174042	0.239139	0.272261
	52.52	0.034152	0.040967	0.036798			37.46	0.171313	0.237202	0.268574
	52.55	0.034094	0.040835	0.03695			37.49	0.16902	0.234902	0.264876
	52.58	0.034048	0.04072	0.037077			37.52	0.165829	0.23216	0.260565
	52.61	0.033998	0.040596	0.037232			37.55	0.163183	0.229756	0.256884
	52.64	0.033935	0.04052	0.037389			37.58	0.160173	0.226955	0.253276
	52.67	0.033864	0.040442	0.037461			37.61	0.157596	0.224517	0.249728
	52.7	0.033792	0.040323	0.037505			37.64	0.15523	0.222476	0.246187
	52.73	0.033741	0.040188	0.037586			37.67	0.15245	0.219626	0.242036
	52.76	0.033683	0.040049	0.037722			37.7	0.149923	0.217125	0.238476
	52.79	0.033596	0.039925	0.037798			37.73	0.14703	0.214213	0.234377
	52.82	0.033523	0.039859	0.037805			37.76	0.144597	0.211743	0.230903
	52.85	0.033454	0.039746	0.037813			37.79	0.141732	0.208886	0.228026
	52.88	0.033435	0.03961	0.037828			37.82	0.139319	0.20681	0.224061
	52.91	0.033369	0.039473	0.037855			37.85	0.137361	0.204327	0.220667
	52.94	0.033278	0.039405	0.037871			37.88	0.13471	0.201483	0.216721
	52.97	0.033196	0.039283	0.03784			37.91	0.132503	0.199096	0.213321
	53	0.033142	0.039137	0.037757			37.94	0.129943	0.196371	0.20931
	53.03	0.033139	0.038959	0.037687			37.97	0.127962	0.19403	0.206417
	53.06	0.033088	0.03881	0.037664			38	0.125685	0.191682	0.202975
	53.09	0.033004	0.038683	0.037619			38.03	0.123368	0.189361	0.198977
	53.12	0.032944	0.038566	0.03751			38.06	0.121704	0.187124	0.195583
	53.15	0.032883	0.038477	0.037372			38.09	0.119366	0.184597	0.19162
	53.18	0.03281	0.038384	0.037262			38.12	0.11737	0.182451	0.188221
	53.21	0.032793	0.038198	0.037189			38.15	0.115438	0.180294	0.185427
	53.24	0.032745	0.038104	0.037135			38.18	0.11333	0.177768	0.181611
	53.27	0.032687	0.038003	0.037013			38.21	0.111554	0.176007	0.178445
	53.3	0.032588	0.037897	0.03688			38.24	0.109811	0.173589	0.174791
	53.33	0.032516	0.037767	0.036728			38.27	0.108057	0.171527	0.171702
	53.36	0.032498	0.037627	0.036595			38.3	0.106352	0.169056	0.168674
	53.39	0.032462	0.03751	0.036511			38.33	0.104503	0.166974	0.165218
	53.42	0.032392	0.037435	0.036352			38.36	0.102937	0.164885	0.162844
	53.45	0.032289	0.037354	0.036216			38.4	0.101096	0.162471	0.159643
	53.48	0.032233	0.03724	0.036136			38.42	0.099535	0.160717	0.15697
	53.51	0.032213	0.037096	0.036022			38.45	0.098025	0.158232	0.153898
	53.54	0.03216	0.037015	0.03594			38.48	0.096625	0.15607	0.151371
	53.57	0.032092	0.036951	0.035797			38.51	0.095285	0.153961	0.149013
	53.6	0.03201	0.036883	0.035783			38.54	0.093754	0.151469	0.146696
	53.63	0.031948	0.036739	0.035691			38.57	0.092451	0.14933	0.144388
	53.66	0.03193	0.036625	0.035553			38.6	0.09103	0.147148	0.141684
	53.69	0.031865	0.036547	0.035421			38.63	0.090215	0.144965	0.139402
	53.72	0.031808	0.036492	0.035313			38.66	0.089012	0.142873	0.137185
	53.75	0.031718	0.036449	0.035215			38.69	0.087723	0.140458	0.134658
	53.78	0.03167	0.036371	0.035094			38.72	0.086605	0.138433	0.132512
	53.81	0.031642	0.036273	0.034983			38.75	0.08527	0.136103	0.130378
	53.84	0.031594	0.036168	0.034867			38.78	0.084167	0.134144	0.128264
	53.87	0.031537	0.036114	0.034793			38.81	0.083109	0.132531	0.126214
	53.9	0.031426	0.036082	0.034715			38.84	0.082037	0.130393	0.12385
	53.93	0.031407	0.035973	0.034611			38.87	0.080973	0.128624	0.121788
	53.96	0.031431	0.035863	0.034496			38.9	0.079742	0.126609	0.119396
	53.99	0.031435	0.035797	0.034425			38.93	0.078743	0.12487	0.117718
	54.02	0.031358	0.035724	0.034349			38.96	0.0776	0.122901	0.115734
	54.05	0.031278	0.035668	0.034265			38.99	0.076637	0.121547	0.113428
	54.08	0.031217	0.035607	0.034171			39.02	0.07579	0.119996	0.111446
	54.11	0.03119	0.035499	0.034049			39.05	0.074571	0.118172	0.109165
	54.14	0.031167	0.035405	0.033971			39.08	0.073565	0.116592	0.107265
	54.17	0.031185	0.03535	0.033932			39.11	0.072444	0.114754	0.105473
	54.2	0.03115	0.035302	0.033868			39.14	0.071513	0.113221	0.10379
	54.23	0.031142	0.035216	0.033764			39.17	0.070615	0.111961	0.102136
	54.26	0.031166	0.035128	0.033657			39.2	0.06973	0.110182	0.100176
	54.29	0.03119	0.035042	0.033608			39.23	0.068909	0.10862	0.098544
	54.32	0.03119	0.034958	0.033554			39.26	0.06797	0.10681	0.096734
	54.35	0.031147	0.034913	0.03348			39.29	0.067212	0.105278	0.095299
	54.35	0.031134	0.03486	0.03342			39.32	0.0665	0.10377	0.0941
	54.38	0.031158	0.03478	0.033348			39.35	0.065711	0.101995	0.09243
	54.41	0.031148	0.034641	0.033288			39.38	0.065067	0.100676	0.091069
	54.44	0.031188	0.034603	0.033236			39.41	0.06449	0.098874	0.089564
	54.47	0.031183	0.034558	0.03319			39.44	0.063949	0.097334	0.088353
	54.5	0.03118	0.034471	0.033104			39.47	0.063364	0.095618	0.08719
	54.53	0.031255	0.034381	0.033001			39.5	0.062692	0.094178	0.086005
	54.56	0.031339	0.034304	0.032918			39.53	0.062192	0.092719	0.084825
	54.59	0.031421	0.034258	0.032902			39.56	0.061642	0.091309	0.083536
	54.62	0.031478	0.034193	0.032864			39.59	0.061244	0.089969	0.082505
	54.65	0.03155	0.034154	0.032806			39.62	0.060635	0.088438	0.081332
	54.68	0.031657	0.034094	0.03272			39.65	0.060056	0.087162	0.080328
	54.71	0.031776	0.033976	0.032677			39.68	0.059483	0.085885	0.079333
	54.74	0.031906	0.033895	0.032617			39.71	0.058876	0.084421	0.078398
	54.77	0.031994	0.033843	0.032573			39.74	0.058381	0.083224	0.0775
	54.8	0.032105	0.033822	0.032514			39.77	0.05772	0.082093	0.076448
	54.83	0.032255	0.033805	0.032417			39.8	0.057215	0.08101	0.075502
	54.86	0.03243	0.033753	0.032311			39.83	0.056598	0.079906	0.074569
	54.89	0.032614	0.033689	0.032243			39.86	0.055935	0.078618	0.073562
	54.92	0.032722	0.033654	0.03219			39.89	0.05538	0.077584	0.072864
	54.95	0.032868	0.033638	0.032136			39.92	0.0547	0.076437	0.071903
	54.98	0.032998	0.03361	0.032024			39.95	0.054105	0.075613	0.071061
	55.01	0.033147	0.033545	0.031935			39.98	0.053652	0.074617	0.070216
	55.04	0.033351	0.03351	0.031876			40.01	0.052894	0.07347	0.069231
	55.08	0.033504	0.033526	0.031887			40.04	0.052348	0.072515	0.068473
	55.1	0.033613	0.033565	0.031811			40.07	0.051753	0.071402	0.067651
	55.13	0.033768	0.033567	0.031708			40.1	0.05123	0.07049	0.067077
	55.16	0.033981	0.033569	0.03165			40.13	0.050664	0.069561	0.066376
	55.19	0.034013	0.033618	0.031623			40.13	0.050586	0.069408	0.066254
	55.22	0.034176	0.033708	0.031585			40.16	0.050301	0.068628	0.065565
	55.25	0.034304	0.033772	0.031505			40.19	0.049876	0.067702	0.06493
	55.28	0.034436	0.033816	0.031434			40.22	0.049366	0.066672	0.064248
	55.31	0.034633	0.033859	0.031378			40.25	0.048927	0.065821	0.063675
	55.34	0.034839	0.033919	0.031331			40.28	0.048439	0.064798	0.063095
	55.37	0.034991	0.034059	0.031288			40.31	0.048107	0.063914	0.06252
	55.4	0.035143	0.034176	0.031237			40.34	0.047822	0.063177	0.061986
	55.43	0.035321	0.034301	0.031174			40.37	0.047541	0.062181	0.061358
	55.46	0.035453	0.034398	0.031126			40.4	0.047225	0.061394	0.060822
	55.49	0.035637	0.034498	0.03106			40.43	0.046808	0.060443	0.060218
	55.52	0.03577	0.034672	0.030999			40.46	0.046482	0.059602	0.059796
	55.55	0.03593	0.034853	0.030961			40.49	0.04619	0.05882	0.059288
	55.58	0.036074	0.035077	0.030922			40.52	0.045838	0.058104	0.058714
	55.61	0.03617	0.035112	0.030865			40.55	0.045554	0.05742	0.058232
	55.64	0.036301	0.035283	0.030857			40.58	0.04511	0.056648	0.057669
	55.67	0.036447	0.03545	0.030841			40.61	0.044753	0.055975	0.057171
	55.7	0.036584	0.035691	0.030757			40.64	0.04442	0.055217	0.0567
	55.73	0.036664	0.035914	0.030687			40.67	0.044036	0.054624	0.056219
	55.76	0.036731	0.03626	0.030622			40.7	0.043676	0.054116	0.05574
	55.79	0.03689	0.036506	0.030604			40.73	0.043187	0.053606	0.05515
	55.82	0.03702	0.036802	0.030609			40.76	0.04287	0.05309	0.054651
	55.85	0.037115	0.03715	0.030608			40.79	0.042486	0.052486	0.054123
	55.88	0.037167	0.037464	0.030565			40.82	0.042184	0.051971	0.053647
	55.91	0.037194	0.037749	0.030454			40.85	0.041841	0.051474	0.053228
	55.94	0.037291	0.038025	0.030389			40.88	0.041387	0.050957	0.052648
	55.97	0.037375	0.038374	0.030381			40.91	0.040985	0.050569	0.052178
	56	0.037442	0.038748	0.030384			40.94	0.040688	0.05001	0.051688
	56.03	0.037491	0.039093	0.030365			40.97	0.040423	0.049552	0.05132
	56.06	0.037526	0.039519	0.030336			41	0.040131	0.049152	0.05096
	56.09	0.037545	0.039855	0.030341			41.03	0.03977	0.048694	0.050489
	56.12	0.037622	0.040131	0.030365			41.06	0.03944	0.048231	0.050159
	56.15	0.03766	0.040461	0.030373			41.09	0.039151	0.047761	0.049709
	56.18	0.037652	0.040807	0.030355			41.12	0.038996	0.047303	0.04937
	56.21	0.037648	0.041226	0.030357			41.15	0.038791	0.046865	0.049098
	56.24	0.037632	0.041575	0.030398			41.18	0.038506	0.046347	0.048735
	56.27	0.037659	0.041919	0.030495			41.21	0.038239	0.045917	0.048393
	56.3	0.037667	0.042138	0.030558			41.24	0.037993	0.04536	0.048109
	56.33	0.037657	0.042517	0.030589			41.27	0.037797	0.044903	0.047853
	56.36	0.037654	0.042899	0.030585			41.3	0.037581	0.04449	0.047603
	56.39	0.037648	0.043159	0.030617			41.33	0.03743	0.044065	0.047287
	56.42	0.037648	0.043494	0.030706			41.36	0.037248	0.043635	0.046975
	56.45	0.037662	0.043814	0.030776			41.39	0.037032	0.04308	0.046627
	56.48	0.037656	0.044117	0.030849			41.42	0.03688	0.042648	0.046337
	56.51	0.037645	0.044328	0.030949			41.45	0.036679	0.042185	0.046069
	56.54	0.037625	0.044517	0.031079			41.48	0.036433	0.041895	0.04579
	56.57	0.037599	0.044685	0.031198			41.51	0.036208	0.041567	0.045474
	56.6	0.037557	0.044829	0.031339			41.54	0.035949	0.04115	0.045094
	56.63	0.037494	0.045018	0.031485			41.57	0.035768	0.040794	0.044813
	56.66	0.037424	0.045183	0.031599			41.6	0.035535	0.040458	0.044513
	56.69	0.037391	0.045294	0.03174			41.63	0.035294	0.040196	0.044271
	56.72	0.037392	0.045367	0.031943			41.66	0.035034	0.039949	0.043953
	56.75	0.037402	0.045408	0.032124			41.69	0.034769	0.039694	0.043595
	56.78	0.037337	0.045459	0.032341			41.72	0.034638	0.039389	0.043313
	56.81	0.037231	0.045495	0.032592			41.75	0.034498	0.039053	0.042996
	56.84	0.037158	0.045509	0.032784			41.78	0.034343	0.03881	0.042726
	56.87	0.037118	0.045514	0.033037			41.81	0.034111	0.038539	0.042515
	56.9	0.037042	0.045476	0.033267			41.84	0.033856	0.038239	0.042203
	56.93	0.036993	0.045419	0.033499			41.87	0.033692	0.03797	0.041981
	56.96	0.03694	0.045392	0.033724			41.9	0.033519	0.037625	0.041732
	56.99	0.036867	0.04533	0.033937			41.93	0.033307	0.037386	0.041536
	57.02	0.03678	0.045238	0.034214			41.96	0.033036	0.037135	0.041265
	57.05	0.03675	0.045102	0.034534			41.99	0.032869	0.036886	0.041013
	57.08	0.036702	0.044959	0.034869			42.02	0.032738	0.036626	0.040835
	57.11	0.036596	0.044881	0.035102			42.05	0.032588	0.0364	0.040678
	57.14	0.036493	0.044754	0.035139			42.08	0.032433	0.036138	0.040548
	57.17	0.036415	0.044629	0.035264			42.11	0.03226	0.03583	0.040333
	57.2	0.036369	0.044463	0.035546			42.14	0.032114	0.035556	0.040115
	57.23	0.036306	0.044301	0.035833			42.17	0.032021	0.03527	0.039901
	57.26	0.036223	0.044202	0.036178			42.2	0.031894	0.034998	0.039748
	57.29	0.036136	0.044057	0.036452			42.23	0.031735	0.034782	0.039627
	57.32	0.036041	0.043863	0.03669			42.26	0.031561	0.034585	0.039435
	57.35	0.035979	0.043676	0.036912			42.29	0.031448	0.034369	0.039226
	57.38	0.035957	0.043476	0.037159			42.32	0.031343	0.034132	0.039005
	57.41	0.035883	0.043352	0.037465			42.35	0.031245	0.033889	0.038791
	57.44	0.035827	0.043191	0.037738			42.38	0.031155	0.033722	0.038585
	57.47	0.03573	0.043043	0.038022			42.41	0.03096	0.033554	0.038395
	57.5	0.035703	0.042858	0.038192			42.44	0.030785	0.033407	0.038212
	57.53	0.035626	0.042645	0.038377			42.47	0.030647	0.033182	0.038027
	57.56	0.035532	0.042529	0.038595			42.5	0.030555	0.032979	0.037817
	57.59	0.03545	0.042366	0.038799			42.53	0.030406	0.032844	0.037662
	57.62	0.035346	0.042203	0.039016			42.56	0.030202	0.032709	0.037442
	57.65	0.035294	0.042054	0.039158			42.59	0.030041	0.032546	0.037281
	57.68	0.035261	0.041893	0.039296			42.62	0.029853	0.032355	0.03708
	57.71	0.035221	0.041728	0.039475			42.65	0.029748	0.032224	0.036923
	57.74	0.035139	0.0416	0.039587			42.68	0.02967	0.032064	0.036761
	57.77	0.035045	0.041449	0.039694			42.71	0.029459	0.031916	0.036564
	57.8	0.035017	0.041265	0.039748			42.74	0.02926	0.031805	0.036403
	57.83	0.034975	0.041119	0.039776			42.77	0.029101	0.03157	0.036235
	57.86	0.03488	0.040992	0.039836			42.8	0.029009	0.031383	0.036071
	57.89	0.034799	0.040826	0.039862			42.83	0.028914	0.031247	0.035951
	57.92	0.034709	0.04071	0.039865			42.86	0.028785	0.031109	0.035808
	57.93	0.034696	0.04052	0.039851			42.89	0.028638	0.03096	0.035694
	57.95	0.034696	0.040376	0.03983			42.92	0.028484	0.030752	0.035524
	57.98	0.034669	0.040282	0.039855			42.95	0.028432	0.030585	0.035427
	58.01	0.034633	0.040171	0.039854			42.98	0.028381	0.030403	0.035348
	58.04	0.034542	0.04002	0.039773			43.02	0.028262	0.030286	0.035197
	58.07	0.034495	0.039863	0.039687			43.04	0.028135	0.0302	0.035045
	58.1	0.034476	0.039721	0.039638			43.07	0.028062	0.029983	0.034864
	58.13	0.034447	0.039595	0.039578			43.1	0.02804	0.029808	0.03473
	58.16	0.034435	0.039489	0.039533			43.13	0.02798	0.029646	0.034628
	58.19	0.034406	0.039414	0.039429			43.16	0.027881	0.029543	0.034544
	58.22	0.034393	0.039256	0.039276			43.19	0.027775	0.029436	0.034403
	58.25	0.034435	0.03914	0.039181			43.22	0.027666	0.02932	0.034251
	58.28	0.034441	0.039013	0.039088			43.25	0.027626	0.029175	0.0341
	58.31	0.034477	0.038923	0.038943			43.28	0.027556	0.029037	0.033956
	58.34	0.03453	0.038818	0.038772			43.31	0.027445	0.028963	0.033868
	58.37	0.034565	0.038693	0.038612			43.34	0.027296	0.028866	0.03373
	58.4	0.034638	0.038585	0.038469			43.37	0.027141	0.02873	0.033565
	58.43	0.034672	0.038453	0.038361			43.4	0.027052	0.028633	0.033427
	58.46	0.034693	0.038385	0.038236			43.43	0.026971	0.028519	0.033277
	58.49	0.034737	0.038328	0.038087			43.46	0.026865	0.028455	0.033156
	58.52	0.034796	0.038222	0.037933			43.49	0.026711	0.028409	0.033023
	58.55	0.034864	0.038127	0.037781			43.52	0.026549	0.028327	0.032869
	58.58	0.034906	0.038057	0.037689			43.55	0.026462	0.028219	0.032749
	58.61	0.034986	0.038039	0.037579			43.58	0.026405	0.028113	0.0326
	58.64	0.035045	0.038046	0.037475			43.61	0.026351	0.02807	0.032495
	58.67	0.035134	0.037973	0.037373			43.64	0.026248	0.027997	0.032341
	58.7	0.035239	0.037892	0.037215			43.67	0.026124	0.027916	0.032135
	58.73	0.035261	0.037851	0.037127			43.68	0.026108	0.027904	0.032098
	58.76	0.035327	0.037903	0.036993			43.7	0.026027	0.027794	0.03197
	58.79	0.035389	0.037966	0.036874			43.73	0.025938	0.027655	0.031832
	58.82	0.035435	0.038003	0.036748			43.76	0.025864	0.027564	0.031716
	58.85	0.035557	0.037997	0.03662			43.79	0.025734	0.027472	0.031589
	58.88	0.035675	0.038009	0.036534			43.82	0.025631	0.027374	0.03147
	58.91	0.035821	0.038077	0.03642			43.85	0.025556	0.027296	0.03134
	58.94	0.035944	0.038209	0.036327			43.88	0.02554	0.027207	0.031229
	58.97	0.036014	0.038295	0.036212			43.91	0.025548	0.027145	0.031156
	59	0.036117	0.038349	0.036049			43.94	0.025504	0.027031	0.031058
	59.03	0.036236	0.038491	0.035979			43.97	0.025455	0.026919	0.030925
	59.06	0.036354	0.038639	0.035927			44	0.025406	0.02682	0.030788
	59.09	0.036506	0.038832	0.035859			44.03	0.025396	0.026673	0.030649
	59.12	0.036593	0.038961	0.035754			44.06	0.025358	0.026578	0.030596
	59.15	0.036698	0.038986	0.035594			44.09	0.025307	0.026468	0.030541
	59.18	0.036782	0.039086	0.035488			44.12	0.02523	0.026365	0.030446
	59.21	0.036875	0.039259	0.035431			44.15	0.025207	0.026246	0.030332
	59.24	0.036977	0.039435	0.03538			44.18	0.025247	0.026103	0.030263
	59.27	0.037059	0.039695	0.035264			44.21	0.025253	0.026035	0.030217
	59.31	0.037173	0.039955	0.035167			44.24	0.025233	0.025984	0.030125
	59.33	0.037267	0.040165	0.03512			44.27	0.025144	0.025904	0.030002
	59.36	0.037343	0.040391	0.035053			44.3	0.025069	0.02581	0.029854
	59.39	0.037443	0.040575	0.034996			44.33	0.025047	0.025712	0.029826
	59.42	0.037514	0.040832	0.034913			44.36	0.025038	0.025621	0.029786
	59.45	0.037592	0.041086	0.034833			44.39	0.024989	0.025574	0.029769
	59.48	0.037687	0.041329	0.034741			44.42	0.024969	0.025528	0.029737
	59.51	0.037821	0.041552	0.034687			44.45	0.024941	0.025418	0.029626
	59.54	0.037876	0.041827	0.034618			44.48	0.024957	0.025333	0.029558
	59.57	0.037898	0.042125	0.034536			44.51	0.024985	0.025264	0.029532
	59.6	0.037963	0.042394	0.034449			44.54	0.025017	0.025228	0.029542
	59.63	0.038044	0.042674	0.034374			44.57	0.025039	0.025204	0.029531
	59.66	0.038131	0.042859	0.034304			44.6	0.025084	0.025122	0.029502
	59.69	0.0382	0.043108	0.034247			44.63	0.025155	0.025046	0.029491
	59.72	0.038258	0.043454	0.034165			44.66	0.02522	0.025	0.029477
	59.75	0.038304	0.043749	0.034108			44.69	0.025264	0.024949	0.029507
	59.78	0.038331	0.043996	0.034022			44.72	0.025228	0.0249	0.029513
	59.81	0.038377	0.04418	0.033963			44.75	0.025244	0.024831	0.029474
	59.84	0.038461	0.044348	0.033948			44.78	0.025307	0.024766	0.029472
	59.87	0.038522	0.044545	0.033908			44.81	0.025418	0.024709	0.029491
	59.9	0.038549	0.044761	0.033865			44.84	0.025482	0.02472	0.02954
	59.93	0.038598	0.045008	0.033846			44.87	0.025532	0.024725	0.029604
	59.96	0.038628	0.045124	0.033814			44.9	0.025574	0.024671	0.029637
	59.99	0.038655	0.04531	0.033764			44.93	0.025661	0.024582	0.029666
	60.02	0.038672	0.045484	0.033708			44.96	0.025815	0.024506	0.029707
	60.05	0.038631	0.045625	0.033664			44.99	0.025896	0.024505	0.029742
	60.08	0.038558	0.04576	0.033608			45.02	0.02595	0.024508	0.0298
	60.11	0.038525	0.045828	0.033618			45.05	0.025931	0.024489	0.029861
	60.14	0.038503	0.045876	0.033638			45.08	0.025977	0.024481	0.029876
	60.17	0.038441	0.045936	0.033638			45.11	0.026124	0.024578	0.029938
	60.2	0.038403	0.045996	0.033624			45.14	0.026203	0.02463	0.029975
	60.23	0.038376	0.046012	0.033651			45.17	0.026232	0.024681	0.029992
	60.26	0.038347	0.045987	0.033722			45.2	0.026286	0.024741	0.030019
	60.29	0.038309	0.045985	0.033783			45.23	0.026354	0.024741	0.030056
	60.32	0.038268	0.045993	0.033854			45.26	0.02644	0.024768	0.030138
	60.35	0.038177	0.045991	0.033892			45.29	0.026505	0.024841	0.030202
	60.38	0.038085	0.045942	0.033932			45.32	0.0265	0.024912	0.030227
	60.41	0.038	0.045858	0.034002			45.35	0.026519	0.024968	0.03023
	60.44	0.037963	0.045749	0.034113			45.38	0.026581	0.025006	0.030214
	60.47	0.037932	0.045698	0.034195			45.41	0.026674	0.02505	0.030216
	60.5	0.037886	0.045641	0.034274			45.44	0.026716	0.02512	0.030238
	60.53	0.037802	0.045557	0.034346			45.47	0.026725	0.02523	0.030259
	60.56	0.037738	0.045386	0.034442			45.5	0.02672	0.025328	0.030248
	60.59	0.037719	0.045198	0.034598			45.53	0.026741	0.025356	0.030208
	60.62	0.037659	0.045075	0.034747			45.56	0.026811	0.025399	0.030211
	60.65	0.03756	0.044924	0.034867			45.59	0.026903	0.025437	0.030225
	60.68	0.037457	0.044788	0.035018			45.62	0.026942	0.025555	0.03026
	60.71	0.037427	0.04464	0.035044			45.65	0.026939	0.02564	0.030259
	60.74	0.037422	0.044486	0.035169			45.68	0.026949	0.025693	0.030235
	60.77	0.037378	0.044317	0.035373			45.71	0.026974	0.025688	0.030205
	60.8	0.03727	0.044199	0.035548			45.74	0.026992	0.025709	0.030222
	60.83	0.037212	0.044058	0.035657			45.77	0.027001	0.025826	0.030236
	60.86	0.037164	0.043898	0.035816			45.8	0.026982	0.025916	0.030227
	60.89	0.03717	0.043695	0.036001			45.83	0.026949	0.025938	0.030175
	60.92	0.037139	0.043571	0.036223			45.86	0.026968	0.025946	0.030091
	60.95	0.037078	0.04341	0.036449			45.89	0.026998	0.025973	0.030064
	60.98	0.036982	0.043298	0.036706			45.92	0.027022	0.026045	0.030059
	61.01	0.036921	0.043138	0.036874			45.95	0.02698	0.026129	0.030007
	61.04	0.036932	0.042942	0.037078			45.98	0.026947	0.02618	0.029905
	61.07	0.036936	0.042801	0.03734			46.01	0.026977	0.026184	0.029821
	61.1	0.036905	0.042674	0.037595			46.04	0.027011	0.026205	0.029807
	61.13	0.036831	0.042564	0.037848			46.07	0.027	0.026221	0.029786
	61.16	0.036758	0.042433	0.038011			46.1	0.026938	0.026249	0.029727
	61.19	0.036723	0.042274	0.038166			46.13	0.026836	0.026237	0.029605
	61.22	0.036709	0.042165	0.03833			46.16	0.026793	0.026205	0.029532
	61.25	0.036702	0.042055	0.038506			46.19	0.026793	0.026207	0.029477
	61.28	0.036666	0.041954	0.038747			46.22	0.026774	0.026233	0.029417
	61.31	0.036636	0.041828	0.038888			46.25	0.026743	0.026264	0.029351
	61.34	0.036666	0.041708	0.039012			46.28	0.026668	0.026251	0.029261
	61.37	0.036707	0.041621	0.039213			46.31	0.026603	0.026237	0.029148
	61.4	0.036736	0.041532	0.03938			46.34	0.026581	0.026203	0.029087
	61.43	0.036787	0.041467	0.039521			46.37	0.026557	0.02621	0.029057
	61.46	0.036812	0.041376	0.039617			46.4	0.026516	0.026253	0.028976
	61.49	0.036844	0.041329	0.039705			46.43	0.026452	0.02627	0.028861
	61.5	0.036882	0.041284	0.039789			46.46	0.026386	0.026229	0.028739
	61.52	0.036915	0.041229	0.039897			46.49	0.026371	0.02621	0.028646
	61.55	0.036915	0.04117	0.040003			46.52	0.026345	0.026214	0.028573
	61.58	0.03694	0.041102	0.040041			46.55	0.026306	0.026213	0.028528
	61.61	0.037016	0.041042	0.040084			46.58	0.026229	0.026164	0.0284
	61.64	0.037061	0.041038	0.040074			46.61	0.026187	0.026089	0.028265
	61.67	0.03712	0.041107	0.040084			46.64	0.026149	0.026015	0.028181
	61.7	0.03715	0.041184	0.04013			46.67	0.026113	0.025994	0.028103
	61.73	0.037147	0.041237	0.040122			46.7	0.026045	0.025997	0.028041
	61.76	0.037215	0.041234	0.040082			46.73	0.025962	0.025991	0.027943
	61.79	0.037308	0.041256	0.040038			46.76	0.02588	0.025942	0.027816
	61.82	0.037354	0.041319	0.040003			46.79	0.025837	0.025824	0.027699
	61.85	0.037356	0.041406	0.039971			46.82	0.02582	0.025769	0.027623
	61.88	0.037407	0.041486	0.039914			46.85	0.025778	0.025751	0.027542
	61.91	0.037495	0.041538	0.039868			46.88	0.025731	0.025734	0.027409
	61.94	0.037562	0.041609	0.039803			46.91	0.025672	0.025663	0.027293
	61.97	0.03767	0.041705	0.039751			46.94	0.025604	0.025552	0.027206
	62	0.037743	0.041828	0.039703			46.97	0.025588	0.02549	0.027157
	62.03	0.037781	0.041971	0.039624			47	0.025532	0.025483	0.027084
	62.06	0.037852	0.042046	0.039484			47.03	0.025406	0.025434	0.026966
	62.09	0.0379	0.042161	0.039373			47.06	0.025293	0.025377	0.026838
	62.12	0.037982	0.042263	0.039299			47.09	0.02525	0.025282	0.026714
	62.15	0.038049	0.042375	0.039211			47.12	0.025228	0.025187	0.026636
	62.18	0.03806	0.042532	0.039093			47.15	0.025123	0.025119	0.026581
	62.21	0.038111	0.042678	0.038972			47.18	0.025028	0.025076	0.026473
	62.24	0.038174	0.042793	0.038828			47.21	0.024965	0.025	0.026373
	62.27	0.038285	0.042915	0.03869			47.24	0.024925	0.024876	0.026246
	62.3	0.038296	0.043122	0.038607			47.25	0.024917	0.024854	0.026232
	62.33	0.038334	0.043259	0.03852			47.27	0.02489	0.024798	0.02617
	62.36	0.038342	0.04341	0.038379			47.3	0.024836	0.024724	0.026088
	62.39	0.038377	0.043573	0.038255			47.33	0.024728	0.024659	0.025983
	62.42	0.038482	0.043682	0.038143			47.36	0.024609	0.024584	0.025886
	62.45	0.038568	0.04385	0.03806			47.39	0.024546	0.024484	0.025796
	62.48	0.038614	0.044006	0.037963			47.42	0.024516	0.02441	0.02574
	62.51	0.038607	0.04413	0.037813			47.45	0.024486	0.024351	0.025697
	62.54	0.038626	0.044225	0.037697			47.48	0.024435	0.024333	0.025615
	62.57	0.038644	0.044331	0.03757			47.51	0.024335	0.024251	0.025512
	62.6	0.038675	0.044469	0.037491			47.54	0.024256	0.024119	0.02535
	62.63	0.038653	0.044582	0.037402			47.57	0.024262	0.024023	0.025277
	62.66	0.038634	0.044713	0.037251			47.6	0.024226	0.023994	0.025242
	62.69	0.038641	0.044818	0.037124			47.63	0.024118	0.023981	0.025177
	62.72	0.038647	0.044831	0.037048			47.66	0.024019	0.02392	0.02506
	62.75	0.038674	0.044892	0.037015			47.69	0.023977	0.023823	0.0249
	62.78	0.038664	0.044946	0.036985			47.72	0.023966	0.023747	0.024814
	62.81	0.038629	0.044988	0.036912			47.75	0.023927	0.02365	0.024763
	62.84	0.038623	0.045053	0.036837			47.78	0.023832	0.023606	0.024711
	62.87	0.038629	0.045121	0.036739			47.81	0.023739	0.023544	0.0246
	62.9	0.038671	0.045151	0.03671			47.84	0.023693	0.023471	0.024457
	62.93	0.038677	0.045206	0.036688			47.87	0.023699	0.023353	0.024351
	62.96	0.03865	0.045235	0.036634			47.9	0.023699	0.023284	0.024308
	62.99	0.038642	0.045243	0.036591			47.93	0.023601	0.02326	0.024281
	63.02	0.038637	0.045186	0.036526			47.96	0.023495	0.023214	0.024191
	63.05	0.03865	0.045121	0.03649			47.99	0.023468	0.023135	0.024137
	63.08	0.038667	0.045054	0.036446			48.02	0.023482	0.023049	0.024042
	63.11	0.038669	0.045046	0.036388			48.05	0.023488	0.022974	0.023926
	63.14	0.038634	0.04501	0.036376			48.08	0.023471	0.022933	0.023859
	63.17	0.038655	0.044916	0.036346			48.11	0.023372	0.02284	0.023785
	63.2	0.038663	0.044831	0.036368			48.14	0.023276	0.02276	0.023704
	63.23	0.038617	0.04477	0.036388			48.17	0.023242	0.022662	0.023647
	63.26	0.038528	0.04471	0.036357			48.2	0.023258	0.022565	0.023607
	63.29	0.038444	0.04462	0.036342			48.23	0.023234	0.022533	0.02355
	63.32	0.038412	0.044499	0.036352			48.26	0.02315	0.022502	0.023447
	63.35	0.038403	0.044372	0.036396			48.29	0.023047	0.022456	0.023349
	63.38	0.038425	0.044253	0.036511			48.32	0.023001	0.022324	0.023266
	63.41	0.038392	0.044174	0.036558			48.35	0.023016	0.022257	0.023198
	63.44	0.03829	0.044117	0.036574			48.38	0.022989	0.022232	0.023157
	63.47	0.038201	0.044036	0.036571			48.41	0.022857	0.022208	0.023052
	63.5	0.038195	0.04392	0.036614			48.44	0.022759	0.022143	0.022995
	63.53	0.038179	0.043814	0.036728			48.47	0.022728	0.022031	0.022944
	63.56	0.038158	0.043711	0.036787			48.5	0.022735	0.021953	0.022892
	63.59	0.038136	0.043641	0.036829			48.53	0.022749	0.02194	0.02284
	63.62	0.038068	0.043593	0.036896			48.56	0.022646	0.021909	0.022787
	63.65	0.03802	0.043459	0.036994			48.59	0.022527	0.021829	0.02273
	63.68	0.038003	0.043364	0.037143			48.62	0.022487	0.021742	0.022644
	63.71	0.037955	0.043313	0.037223			48.65	0.0225	0.021672	0.022568
	63.74	0.0379	0.04326	0.037316			48.68	0.0225	0.021585	0.022527
	63.77	0.037876	0.043167	0.037438			48.71	0.022454	0.021528	0.022454
	63.8	0.037895	0.043059	0.037567			48.74	0.022407	0.02148	0.02237
	63.83	0.037946	0.043023	0.037713			48.77	0.022335	0.02139	0.022254
	63.86	0.038019	0.043019	0.037797			48.8	0.022302	0.021327	0.022218
	63.89	0.038047	0.043015	0.037903			48.83	0.022284	0.021252	0.022207
	63.93	0.03809	0.043005	0.037992			48.86	0.022242	0.021231	0.02215
	63.95	0.038116	0.042931	0.03813			48.89	0.022189	0.021208	0.022062
	63.98	0.038158	0.042872	0.038265			48.92	0.022165	0.021106	0.021956
	64.01	0.038155	0.042818	0.038393			48.95	0.0222	0.021014	0.021939
	64.04	0.038143	0.042791	0.03849			48.99	0.022191	0.020952	0.021953
	64.07	0.038119	0.042769	0.038536			49.01	0.022072	0.020936	0.02191
	64.1	0.038157	0.042747	0.038612			49.04	0.021999	0.020924	0.021821
	64.13	0.038261	0.042751	0.038744			49.07	0.021936	0.020835	0.02174
	64.16	0.03833	0.042791	0.038842			49.1	0.021953	0.020737	0.021701
	64.19	0.038365	0.042853	0.038942			49.13	0.021989	0.020678	0.021688
	64.22	0.038361	0.042924	0.038997			49.16	0.021959	0.020671	0.021629
	64.25	0.03838	0.042956	0.039083			49.19	0.021894	0.020643	0.021539
	64.28	0.03842	0.042964	0.039096			49.22	0.02181	0.020538	0.021434
	64.31	0.038438	0.042999	0.039175			49.25	0.021786	0.020426	0.021411
	64.34	0.038464	0.043034	0.039246			49.28	0.021764	0.020383	0.021441
	64.37	0.038491	0.043086	0.039291			49.31	0.021729	0.020353	0.021434
	64.4	0.038544	0.043148	0.039299			49.34	0.021679	0.020296	0.021384
	64.43	0.038615	0.043168	0.039326			49.37	0.021656	0.020227	0.021293
	64.46	0.038653	0.04321	0.039375			49.4	0.021679	0.020153	0.021217
	64.49	0.038648	0.043243	0.039416			49.43	0.021713	0.020104	0.021209
	64.52	0.038645	0.043286	0.039459			49.46	0.021679	0.020075	0.021214
	64.55	0.038629	0.043359	0.03951			49.49	0.021569	0.02001	0.021179
	64.58	0.03866	0.043389	0.039543			49.52	0.021468	0.019948	0.021127
	64.61	0.038682	0.04344	0.039567			49.55	0.021433	0.019901	0.021071
	64.64	0.038644	0.043492	0.039514			49.58	0.021464	0.019859	0.021001
	64.67	0.038623	0.043595	0.039462			49.61	0.021471	0.019852	0.020976
	64.7	0.038637	0.043655	0.039405			49.64	0.021409	0.019859	0.020938
	64.73	0.038667	0.043711	0.039376			49.67	0.021374	0.019774	0.020905
	64.76	0.038675	0.043722	0.039359			49.7	0.021401	0.019666	0.020886
	64.79	0.038655	0.043781	0.03937			49.73	0.02146	0.019607	0.020879
	64.82	0.038626	0.043881	0.039322			49.76	0.021466	0.019607	0.020827
	64.85	0.038617	0.04393	0.039251			49.79	0.021407	0.019644	0.020738
	64.88	0.038639	0.043946	0.039165			49.82	0.02136	0.019614	0.020681
	64.91	0.038675	0.043961	0.039135			49.85	0.021304	0.019509	0.020645
	64.94	0.038671	0.044007	0.039115			49.88	0.021271	0.019438	0.020649
	64.97	0.038625	0.044099	0.039045			49.91	0.021244	0.019406	0.02067
	65	0.038626	0.044179	0.038958			49.94	0.021184	0.019396	0.020665
	65.03	0.038647	0.044202	0.038893			49.97	0.021141	0.019393	0.020583
	65.03	0.038661	0.04421	0.038872			50	0.021135	0.019365	0.020505
	65.06	0.038664	0.044225	0.038817			50.03	0.021177	0.019289	0.020442
	65.09	0.038655	0.044268	0.038761			50.06	0.021204	0.019227	0.02043
	65.12	0.038647	0.044275	0.038653			50.09	0.021179	0.019185	0.020432
	65.15	0.038652	0.044252	0.038547			50.12	0.021154	0.019166	0.020403
	65.18	0.038666	0.044234	0.038471			50.15	0.021093	0.019112	0.020375
	65.21	0.038682	0.044244	0.038453			50.18	0.021063	0.01909	0.020364
	65.24	0.038655	0.044266	0.03842			50.21	0.021039	0.019084	0.020413
	65.27	0.038636	0.04426	0.038331			50.24	0.020968	0.0191	0.0204
	65.3	0.038633	0.044244	0.038252			50.27	0.020901	0.019073	0.020326
	65.33	0.038666	0.044237	0.038176			50.3	0.020895	0.01896	0.020223
	65.36	0.038661	0.044247	0.038168			50.33	0.020924	0.018897	0.020162
	65.39	0.038645	0.044263	0.03813			50.36	0.020949	0.018857	0.020148
	65.42	0.038637	0.044269	0.038039			50.39	0.020925	0.018868	0.020167
	65.45	0.038647	0.044252	0.037952			50.42	0.020886	0.018879	0.020154
	65.48	0.038664	0.044229	0.037898			50.45	0.020878	0.018851	0.020128
	65.51	0.038669	0.044183	0.037895			50.48	0.020897	0.018792	0.020118
	65.54	0.038656	0.044153	0.037886			50.51	0.020944	0.018714	0.020131
	65.57	0.038637	0.044128	0.037852			50.54	0.020949	0.018684	0.020153
	65.6	0.038644	0.044061	0.037849			50.57	0.020895	0.018667	0.02015
	65.63	0.038667	0.044014	0.037811			50.6	0.02086	0.018611	0.02011
	65.66	0.038682	0.043996	0.037813			50.63	0.020887	0.018565	0.020099
	65.69	0.038652	0.044012	0.03787			50.66	0.02096	0.018559	0.020105
	65.72	0.038641	0.044023	0.037887			50.69	0.021005	0.018583	0.02012
	65.75	0.038648	0.044028	0.037844			50.72	0.021019	0.018588	0.020143
	65.78	0.03866	0.043979	0.037827			50.75	0.021043	0.018595	0.020113
	65.81	0.038667	0.043923	0.03786			50.78	0.021097	0.018581	0.020112
	65.84	0.038637	0.043887	0.037876			50.81	0.021165	0.018542	0.020126
	65.87	0.038637	0.043849	0.037879			50.82	0.021177	0.018543	0.020129
	65.9	0.038612	0.043795	0.037862			50.84	0.021201	0.018569	0.020142
	65.93	0.038612	0.043754	0.037836			50.87	0.021147	0.01858	0.020134
	65.96	0.03862	0.043728	0.037871			50.9	0.021116	0.018478	0.020089
	65.99	0.038652	0.043749	0.037903			50.93	0.021203	0.018407	0.020082
	66.02	0.038641	0.043768	0.037947			50.96	0.021315	0.018358	0.020118
	66.05	0.038626	0.04377	0.037992			50.99	0.021382	0.018331	0.020169
	66.08	0.038626	0.043749	0.038043			51.02	0.021379	0.018351	0.020232
	66.11	0.038658	0.043741	0.03809			51.05	0.021434	0.018391	0.020269
	66.14	0.038645	0.043757	0.038149			51.08	0.021526	0.018415	0.020288
	66.17	0.038652	0.043782	0.038193			51.11	0.021612	0.018465	0.020335
	66.2	0.038648	0.043779	0.038252			51.14	0.021677	0.018515	0.020388
	66.23	0.038642	0.043744	0.03828			51.17	0.021706	0.018567	0.020399
	66.26	0.038658	0.043736	0.038315			51.2	0.021742	0.018584	0.020426
	66.29	0.03866	0.043738	0.038376			51.23	0.021799	0.018578	0.020459
	66.32	0.038652	0.043754	0.038412			51.26	0.021904	0.018556	0.020524
	66.35	0.038621	0.04376	0.038474			51.29	0.02202	0.018553	0.020591
	66.38	0.038629	0.043762	0.038506			51.32	0.022089	0.018602	0.020659
	66.41	0.038645	0.043752	0.038542			51.35	0.022121	0.018649	0.020721
	66.44	0.038653	0.043781	0.038587			51.38	0.022194	0.018683	0.020768
	66.47	0.038648	0.04386	0.038604			51.41	0.022327	0.018737	0.020859
	66.5	0.03865	0.043934	0.038602			51.44	0.022434	0.018786	0.020933
	66.53	0.038628	0.04399	0.03858			51.47	0.022518	0.018824	0.021055
	66.56	0.038642	0.044001	0.038587			51.5	0.022538	0.018871	0.021101
	66.59	0.038667	0.043987	0.038669			51.53	0.022586	0.018916	0.021131
	66.62	0.038658	0.043963	0.038755			51.56	0.022665	0.018963	0.021215
	66.65	0.038642	0.043999	0.038791			51.59	0.022738	0.019011	0.02133
	66.68	0.038648	0.044031	0.038802			51.62	0.022814	0.019086	0.021422
	66.71	0.038645	0.044012	0.038818			51.65	0.022832	0.019157	0.021472
	66.74	0.038656	0.043984	0.038866			51.68	0.022851	0.019222	0.021539
	66.77	0.03866	0.043992	0.038882			51.71	0.022876	0.01926	0.021658
	66.8	0.038655	0.044009	0.03887			51.74	0.022965	0.019338	0.021767
	66.83	0.038623	0.044004	0.038856			51.77	0.023062	0.019461	0.021885
	66.86	0.038634	0.044011	0.038848			51.8	0.023085	0.019545	0.021923
	66.89	0.038655	0.04399	0.038856			51.83	0.023112	0.01962	0.021928
	66.92	0.038672	0.043985	0.038882			51.86	0.023163	0.019671	0.021996
	66.95	0.038653	0.044017	0.038864			51.89	0.023238	0.019722	0.022064
	66.98	0.038639	0.044061	0.038813			51.92	0.023323	0.019829	0.02217
	67.01	0.038621	0.044118	0.038728			51.95	0.023345	0.019932	0.022261
	67.04	0.038641	0.044169	0.038669			51.98	0.02338	0.020028	0.022321
	67.07	0.038661	0.044188	0.038664			52.01	0.023439	0.020074	0.022353
	67.1	0.038648	0.044226	0.038656			52.04	0.023498	0.020132	0.022403
	67.13	0.038631	0.044256	0.038645			52.07	0.02356	0.020229	0.022519
	67.16	0.038631	0.044258	0.038606			52.1	0.023561	0.020351	0.022575
	67.2	0.038663	0.044237	0.038591			52.13	0.023591	0.020476	0.02261
	67.22	0.038667	0.044226	0.038618			52.16	0.023661	0.020548	0.022643
	67.25	0.038656	0.044222	0.038598			52.19	0.023753	0.020602	0.022665
	67.28	0.03862	0.044248	0.038606			52.22	0.023829	0.020721	0.022713
	67.31	0.03861	0.044271	0.038534			52.25	0.023832	0.020794	0.022741
	67.34	0.038636	0.044248	0.038477			52.28	0.023824	0.020882	0.022779
	67.37	0.038661	0.044236	0.038441			52.31	0.023843	0.020962	0.022825
	67.4	0.038653	0.044239	0.038409			52.34	0.023889	0.020979	0.022886
	67.43	0.038642	0.044263	0.038365			52.37	0.02394	0.021076	0.022952
	67.46	0.038626	0.044282	0.038336			52.4	0.023939	0.021185	0.022958
	67.49	0.038637	0.044253	0.03832			52.43	0.023899	0.021284	0.022955
	67.52	0.038645	0.044228	0.038292			52.46	0.023891	0.021322	0.022935
	67.55	0.038682	0.044244	0.038233			52.49	0.023894	0.021341	0.022943
	67.58	0.038652	0.044275	0.038176			52.52	0.02385	0.021404	0.02296
	67.61	0.038641	0.044268	0.038106			52.55	0.023788	0.021509	0.022968
	67.64	0.038648	0.044236	0.038085			52.58	0.023718	0.02162	0.022939
	67.67	0.038672	0.044231	0.038117			52.61	0.023704	0.021618	0.022925
	67.7	0.038661	0.044244	0.038122			52.64	0.023731	0.021614	0.022971
	67.73	0.038615	0.04426	0.038066			52.67	0.023737	0.02162	0.023071
	67.76	0.038625	0.04426	0.037978			52.7	0.023718	0.021664	0.023135
	67.79	0.038648	0.044264	0.037924			52.73	0.023607	0.021774	0.023169
	67.82	0.038661	0.044242	0.037917			52.76	0.023539	0.021809	0.023176
	67.85	0.038671	0.044239	0.037911			52.79	0.023506	0.021829	0.023188
	67.88	0.038642	0.04425	0.037878			52.82	0.023518	0.021858	0.023196
	67.91	0.038645	0.044277	0.037843			52.85	0.023493	0.021893	0.023211
	67.94	0.038661	0.044258	0.037819			52.88	0.023461	0.021923	0.023163
	67.97	0.038645	0.044223	0.037817			52.91	0.023412	0.021924	0.02306
	68	0.038655	0.044223	0.037848			52.94	0.02336	0.021901	0.022985
	68.03	0.038644	0.044256	0.037867			52.97	0.023333	0.021882	0.022963
	68.06	0.038631	0.044275	0.037865			53	0.02329	0.021958	0.022985
	68.09	0.038641	0.044266	0.037855			53.03	0.023246	0.022015	0.022984
	68.12	0.038674	0.044258	0.037859			53.06	0.02323	0.022089	0.022938
	68.15	0.038687	0.044239	0.037876			53.09	0.023233	0.022104	0.02293
	68.18	0.038647	0.044264	0.037889			53.12	0.023206	0.022115	0.022949
	68.21	0.038634	0.044271	0.037884			53.15	0.023138	0.022142	0.022974
	68.24	0.038633	0.044266	0.037855			53.18	0.023066	0.022178	0.022962
	68.27	0.038653	0.044245	0.037849			53.21	0.022995	0.022188	0.022946
	68.3	0.038666	0.04422	0.037857			53.24	0.022984	0.02218	0.022939
	68.33	0.03865	0.044258	0.037863			53.27	0.022977	0.022153	0.022943
	68.36	0.038615	0.04429	0.037882			53.3	0.022874	0.022175	0.022984
	68.39	0.038628	0.044275	0.037846			53.33	0.022787	0.022191	0.022973
	68.42	0.03865	0.044239	0.037841			53.36	0.022751	0.022191	0.022938
	68.45	0.038666	0.044231	0.037863			53.39	0.022724	0.022159	0.022916
	68.48	0.038645	0.044247	0.037859			53.42	0.022714	0.022159	0.022917
	68.51	0.038645	0.044255	0.037859			53.45	0.02269	0.022183	0.022881
	68.54	0.038641	0.044268	0.03786			53.48	0.022619	0.022178	0.022827
	68.57	0.038647	0.044233	0.037851			53.51	0.022543	0.022194	0.02277
	68.6	0.038672	0.044209	0.037844			53.54	0.022505	0.022162	0.022705
	68.61	0.038663	0.044261	0.037867			53.57	0.022535	0.022137	0.022708
	68.63	0.038636	0.04428	0.037876			53.61	0.022521	0.022088	0.022716
	68.66	0.038617	0.044261	0.037833			53.63	0.022438	0.022026	0.022717
	68.69	0.038634	0.044252	0.037832			53.66	0.022356	0.021975	0.022697
	68.72	0.038661	0.044244	0.037827			53.69	0.022305	0.021934	0.022633
	68.75	0.038669	0.044248	0.037862			53.72	0.022297	0.021907	0.022579
	68.78	0.038655	0.04425	0.037886			53.75	0.022234	0.02191	0.022533
	68.81	0.038629	0.044258	0.037859			53.78	0.022145	0.021926	0.022495
	68.84	0.038634	0.044261	0.037802			53.81	0.022067	0.021943	0.022454
	68.87	0.038664	0.044231	0.037844			53.84	0.022045	0.021912	0.022424
	68.9	0.038653	0.044236	0.037868			53.87	0.022058	0.021888	0.022422
	68.93	0.038663	0.044266	0.037878			53.9	0.022072	0.021909	0.022427
	68.96	0.038634	0.044274	0.037879			53.93	0.022018	0.021928	0.022445
	68.99	0.038645	0.044258	0.037859			53.96	0.021902	0.021942	0.022434
	69.02	0.038652	0.044225	0.037849			53.99	0.021829	0.021939	0.022373
	69.05	0.038644	0.044214	0.037857			54.02	0.021818	0.021909	0.02231
	69.08	0.038618	0.044252	0.037879			54.05	0.02178	0.021896	0.022283
	69.11	0.038604	0.044256	0.037844			54.08	0.021712	0.021929	0.022259
	69.14	0.038617	0.04425	0.037816			54.11	0.021591	0.021942	0.022213
	69.17	0.038644	0.044236	0.037816			54.14	0.021525	0.021851	0.02218
	69.2	0.038661	0.044217	0.037849			54.17	0.021544	0.021779	0.022164
	69.23	0.03866	0.044256	0.03789			54.2	0.021544	0.02171	0.022188
	69.26	0.038636	0.04429	0.037884			54.23	0.021493	0.021706	0.022194
	69.29	0.03862	0.044264	0.037833			54.26	0.021377	0.02171	0.022127
	69.32	0.038658	0.044237	0.037832			54.29	0.021292	0.021688	0.022034
	69.35	0.038674	0.044226	0.037852			54.32	0.021281	0.021664	0.021969
	69.38	0.038653	0.044242	0.037798			54.35	0.021266	0.02161	0.021956
	69.41	0.03865	0.044258	0.037705			54.35	0.021257	0.021612	0.021962
	69.44	0.038626	0.044244	0.03767			54.38	0.021204	0.021617	0.021969
	69.47	0.038618	0.044237	0.037641			54.41	0.021097	0.021582	0.021926
	69.5	0.038628	0.044229	0.03761			54.44	0.021027	0.021488	0.021893
	69.53	0.038653	0.044244	0.037622			54.47	0.020982	0.021415	0.021894
	69.56	0.038652	0.04426	0.037633			54.5	0.020943	0.021384	0.021888
	69.59	0.038631	0.044255	0.0376			54.53	0.020892	0.021404	0.021866
	69.62	0.038626	0.044244	0.037581			54.56	0.020819	0.021447	0.021786
	69.65	0.038656	0.044244	0.037597			54.59	0.020771	0.021442	0.021715
	69.68	0.038667	0.044256	0.037619			54.62	0.020762	0.021406	0.021672
	69.71	0.038636	0.044274	0.037627			54.65	0.02079	0.021349	0.021675
	69.74	0.038626	0.044277	0.037614			54.68	0.020776	0.021292	0.021696
	69.77	0.038615	0.044256	0.037584			54.71	0.020668	0.021241	0.021704
	69.8	0.038644	0.044236	0.037611			54.74	0.02057	0.021212	0.021648
	69.83	0.03866	0.044228	0.037616			54.77	0.02053	0.021165	0.021604
	69.86	0.038655	0.044244	0.03763			54.8	0.02056	0.021141	0.021564
	69.89	0.038625	0.04425	0.037597			54.83	0.020537	0.021138	0.021534
	69.92	0.038623	0.044239	0.037586			54.86	0.020437	0.021149	0.021472
	69.95	0.038642	0.044206	0.037583			54.89	0.020331	0.021114	0.021436
	69.98	0.038663	0.044201	0.037568			54.92	0.020307	0.021008	0.021398
	70.01	0.038614	0.044228	0.037545			54.95	0.020318	0.020941	0.021395
	70.04	0.038523	0.044274	0.037483			54.98	0.020318	0.020922	0.02142
	70.07	0.038438	0.044261	0.037407			55.01	0.020269	0.020927	0.021431
	70.1	0.038423	0.044229	0.037376			55.04	0.020193	0.020924	0.021411
	70.13	0.038436	0.044223	0.037388			55.07	0.020104	0.02089	0.021338
	70.16	0.038438	0.044233	0.037384			55.1	0.020078	0.020851	0.021282
	70.19	0.038409	0.044268	0.037354			55.13	0.020048	0.020776	0.021249
	70.22	0.038385	0.044261	0.03733			55.16	0.020031	0.020746	0.021211
	70.25	0.038399	0.044237	0.03733			55.19	0.020005	0.02071	0.021174
	70.28	0.038404	0.04422	0.037364			55.22	0.019963	0.020656	0.021141
	70.31	0.038418	0.044222	0.037397			55.25	0.019937	0.020635	0.021135
	70.34	0.038406	0.044256	0.037367			55.28	0.01988	0.020622	0.02116
	70.37	0.038377	0.044271	0.037356			55.31	0.01984	0.020646	0.021163
	70.4	0.03839	0.044271	0.037346			55.34	0.019769	0.020665	0.021112
	70.43	0.038415	0.044252	0.037351			55.37	0.019752	0.020651	0.021005
	70.46	0.038431	0.04425	0.037375			55.4	0.019753	0.020616	0.020944
	70.49	0.038398	0.044275	0.037376			55.43	0.019775	0.020611	0.020928
	70.52	0.038376	0.044287	0.037346			55.46	0.019747	0.020616	0.020919
	70.55	0.038372	0.04428	0.037338			55.49	0.019645	0.020548	0.020913
	70.58	0.038414	0.044252	0.037369			55.52	0.019563	0.020497	0.020903
	70.61	0.038434	0.044228	0.037329			55.55	0.019523	0.020432	0.020889
	70.64	0.038414	0.044255	0.037278			55.58	0.019541	0.020392	0.020911
	70.67	0.038379	0.044271	0.037185			55.61	0.019536	0.020392	0.020906
	70.7	0.03839	0.044258	0.037123			55.64	0.019507	0.0204	0.020911
	70.73	0.038412	0.044242	0.03712			55.67	0.019476	0.020408	0.02089
	70.76	0.038412	0.044222	0.037134			55.7	0.019493	0.020391	0.020817
	70.79	0.038407	0.044242	0.037112			55.73	0.019509	0.020365	0.020765
	70.82	0.038401	0.044272	0.037086			55.76	0.019522	0.02037	0.020722
	70.85	0.038372	0.044268	0.037097			55.79	0.01949	0.020313	0.020698
	70.88	0.038396	0.044222	0.037101			55.82	0.019453	0.020226	0.020665
	70.91	0.038407	0.04418	0.037121			55.85	0.019461	0.020172	0.02063
	70.94	0.038396	0.04415	0.037145			55.88	0.019519	0.020123	0.020624
	70.97	0.038398	0.044114	0.03712			55.91	0.01953	0.020132	0.020645
	71	0.038393	0.044074	0.03707			55.94	0.019493	0.02015	0.020652
	71.03	0.038407	0.044014	0.037088			55.97	0.019465	0.020134	0.020622
	71.06	0.038433	0.043988	0.037085			56	0.019457	0.02011	0.020613
	71.09	0.038426	0.043992	0.037029			56.03	0.019487	0.020096	0.020614
	71.12	0.038395	0.044026	0.036953			56.06	0.019523	0.02011	0.020645
	71.15	0.038363	0.044015	0.036893			56.09	0.019484	0.020139	0.020667
	71.18	0.038357	0.043984	0.036871			56.12	0.019447	0.02014	0.020657
	71.21	0.038311	0.043974	0.03689			56.15	0.019452	0.020097	0.020624
	71.24	0.038238	0.043982	0.036891			56.18	0.019485	0.020074	0.020626
	71.27	0.038173	0.044017	0.036867			56.21	0.019511	0.020101	0.020654
	71.3	0.03815	0.044023	0.036839			56.24	0.019501	0.020139	0.020662
	71.33	0.038155	0.044011	0.036848			56.27	0.019469	0.02015	0.020649
	71.36	0.038173	0.043985	0.036867			56.3	0.019473	0.020131	0.020622
	71.39	0.038154	0.043984	0.036874			56.33	0.019488	0.020105	0.020645
	71.42	0.038146	0.044003	0.036891			56.36	0.019496	0.020107	0.020716
	71.45	0.038127	0.044017	0.036858			56.39	0.019496	0.020131	0.020803
	71.48	0.038147	0.043996	0.03681			56.42	0.019469	0.020139	0.020824
	71.51	0.03813	0.043984	0.036828			56.45	0.019447	0.020128	0.020825
	71.54	0.038062	0.043971	0.036829			56.48	0.019476	0.020099	0.020844
	71.57	0.037995	0.044001	0.036863			56.51	0.019522	0.020107	0.020894
	71.6	0.037922	0.043992	0.036871			56.54	0.019517	0.020139	0.020924
	71.63	0.037911	0.043887	0.036847			56.57	0.019479	0.020166	0.020908
	71.66	0.037941	0.043789	0.036847			56.6	0.019461	0.020134	0.020901
	71.69	0.037933	0.043779	0.03685			56.63	0.019482	0.020089	0.020968
	71.72	0.037903	0.043777	0.036858			56.66	0.01953	0.020083	0.021043
	71.75	0.037895	0.043776	0.036861			56.69	0.019512	0.02011	0.021095
	71.78	0.037887	0.043776	0.036852			56.72	0.019498	0.020129	0.021114
	71.82	0.037914	0.043741	0.036828			56.75	0.019458	0.02011	0.021111
	71.84	0.037922	0.043752	0.036829			56.78	0.019474	0.020099	0.021112
	71.87	0.037909	0.04377	0.036861			56.81	0.019517	0.020108	0.021155
	71.9	0.037889	0.043776	0.03689			56.84	0.019507	0.020147	0.021195
	71.93	0.037898	0.04375	0.036842			56.87	0.019482	0.020237	0.021271
	71.96	0.037911	0.043717	0.036783			56.9	0.019447	0.020307	0.021325
	71.99	0.037928	0.043735	0.036742			56.93	0.019465	0.020311	0.021333
	72.02	0.037924	0.043738	0.036696			56.96	0.019507	0.020338	0.021379
	72.05	0.037897	0.043747	0.036656			56.99	0.019504	0.020372	0.021415
	72.08	0.037897	0.043752	0.03663			57.02	0.019495	0.020405	0.021438
	72.11	0.037913	0.043684	0.036612			57.05	0.019449	0.020389	0.021464
	72.14	0.037914	0.043579	0.036607			57.08	0.019403	0.020361	0.021504
	72.17	0.037898	0.043552	0.03661			57.11	0.019379	0.020378	0.02158
	72.18	0.037892	0.043541	0.036617			57.14	0.019352	0.020478	0.021644
	72.2	0.03787	0.043543	0.036622			57.17	0.019279	0.020591	0.02166
	72.23	0.037876	0.043505	0.036601			57.2	0.019217	0.020624	0.021648
	72.26	0.037914	0.043478	0.036603			57.23	0.019224	0.020632	0.021636
	72.29	0.037919	0.0435	0.036609			57.27	0.019249	0.02061	0.021644
	72.32	0.037886	0.043519	0.03662			57.29	0.01927	0.020611	0.02169
	72.35	0.037878	0.043511	0.036591			57.32	0.019233	0.020676	0.021777
	72.38	0.037895	0.043478	0.036553			57.35	0.019197	0.020724	0.021815
	72.41	0.037908	0.043479	0.036499			57.38	0.019201	0.020776	0.021851
	72.44	0.037924	0.043487	0.036453			57.41	0.01923	0.020816	0.021888
	72.47	0.0379	0.043519	0.036417			57.44	0.01925	0.020857	0.021909
	72.5	0.037874	0.043532	0.036387			57.47	0.019176	0.020881	0.021926
	72.53	0.037884	0.043506	0.036352			57.5	0.019087	0.020906	0.021928
	72.56	0.037895	0.043465	0.036352			57.53	0.019032	0.020901	0.021905
	72.59	0.037905	0.043443	0.036374			57.56	0.019017	0.020887	0.021926
	72.62	0.037884	0.043405	0.036379			57.59	0.019028	0.0209	0.02198
	72.65	0.037848	0.043344	0.036354			57.62	0.018982	0.020987	0.022037
	72.68	0.037817	0.043287	0.036342			57.65	0.018943	0.02106	0.022059
	72.71	0.037749	0.043248	0.036357			57.68	0.018955	0.021089	0.022099
	72.74	0.037717	0.043245	0.036374			57.71	0.018957	0.021098	0.022134
	72.78	0.037683	0.043264	0.036381			57.74	0.018982	0.021111	0.022177
	72.8	0.037654	0.043283	0.036371			57.77	0.019009	0.021149	0.02221
	72.83	0.037652	0.043249	0.036335			57.8	0.018962	0.021168	0.022197
	72.86	0.037657	0.043222	0.036342			57.83	0.018887	0.021166	0.022143
	72.89	0.037673	0.043233	0.036357			57.86	0.018856	0.021163	0.02215
	72.92	0.037657	0.043203	0.036376			57.89	0.018821	0.021155	0.022186
	72.95	0.037625	0.043151	0.036322			57.92	0.018789	0.021169	0.02221
	72.98	0.037622	0.043053	0.036214			57.93	0.018783	0.021173	0.022213
	73.01	0.037632	0.043019	0.036135			57.95	0.018737	0.021176	0.022205
	73.04	0.037659	0.043008	0.036124			57.98	0.018667	0.021133	0.022167
	73.07	0.037656	0.04301	0.036136			58.01	0.018667	0.021098	0.022108
	73.1	0.037625	0.043021	0.036122			58.04	0.018694	0.0211	0.02215
	73.13	0.037616	0.043013	0.036106			58.07	0.018645	0.021139	0.022183
	73.16	0.037622	0.042999	0.036084			58.1	0.018554	0.021196	0.022186
	73.19	0.03767	0.042981	0.036103			58.13	0.018459	0.021279	0.022154
	73.22	0.037676	0.042981	0.036136			58.16	0.018443	0.02132	0.022131
	73.25	0.037594	0.043	0.036125			58.19	0.0185	0.021353	0.022146
	73.28	0.037497	0.043004	0.036095			58.23	0.018492	0.021398	0.022191
	73.31	0.037446	0.042975	0.036081			58.25	0.018456	0.021422	0.022199
	73.34	0.037454	0.042935	0.036084			58.28	0.01841	0.021428	0.022172
	73.37	0.037451	0.042889	0.036117			58.31	0.018345	0.021409	0.022153
	73.4	0.03743	0.04288	0.036081			58.34	0.018289	0.021382	0.022181
	73.43	0.037391	0.042864	0.036			58.37	0.018281	0.021395	0.022204
	73.46	0.037376	0.04282	0.035911			58.4	0.018224	0.021426	0.022197
	73.49	0.037403	0.042755	0.035889			58.43	0.018193	0.021422	0.022172
[truncated: 1,026 more rows]

## Sheet: Fig.4 - fig. suppl. 3
PANEL C		all mRNAs	uORFs_AUG	uORFs_near_cognate			Dunnett's multiple comparisons test	Summary	Adjusted P Value
		-1.88178	-1.88178	-1.88178			all mRNAs vs. uORFs_AUG	ns	0.115
		-1.46372	-1.44527	-1.4538			all mRNAs vs. uORFs_near_cognate	ns	0.959
		-1.4538	-1.31333	-1.44681
		-1.44681	-1.27513	-1.44527
		-1.44527	-1.25661	-1.43597			PANEL D
		-1.43597	-1.22736	-1.39096
		-1.39096	-1.20897	-1.32148					WT			WT + TM			KO1			KO1 + TM			KO2			KO2 +TM
		-1.32148	-1.17869	-1.31333				LamB	1	1	1	1	1	1	1	1	1	1	1	1	1	1	1	1	1	1
		-1.33018	-1.11561	-1.27513				SLC7A11	1	1	1	0.708854	0.663998	0.799422	1	1	1	0.654887	1.07248	0.891861	1	1	1	0.998996	0.762346	1.04732
		-1.31333	-1.06482	-1.27509				QTRT2	1	1	1	0.877044	1.0567	1.00764	1	1	1	1.11867	1.70519	1.09378	1	1	1	1.85408	0.976666	1.1886
		-1.27509	-1.06024	-1.25661				CNOT1	1	1	1	1.0073	1.14379	0.80786	1	1	1	1.31528	1.61003	0.910846	1	1	1	2.29011	1.0743	0.843666
		-1.22736	-1.05517	-1.24176				IQGAP1	1	1	1	1.08769	1.20454	0.83579	1	1	1	1.02735	1.63874	0.936386	1	1	1	1.78859	1.54831	0.98522
		-1.24176	-1.046	-1.22736				ARHGAP11A	1	1	1	1.12877	2.03541	1.19022	1	1	1	1.33603	1.15511	1.06695	1	1	1	1.19916	1.62312	0.868951
		-1.25661	-1.04064	-1.20897				POLR3E	1	1	1	0.446037	0.733152	0.511824	1	1	1	0.666205	0.725584	0.644736	1	1	1	0.920811	0.844696	0.719482
		-1.27513	-1.02946	-1.17869				PNPLA8	1	1	1	0.768432	1.51344	0.786169	1	1	1	1.04003	1.07221	0.919626	1	1	1	1.62058	1.99711	0.823695
		-1.13035	-1.00853	-1.15508				ACTN4	1	1	1	0.66312	1.40304	0.773132	1	1	1	0.859968	1.17832	0.944142	1	1	1	1.43121	1.12608	1.04946
		-1.14802	-1.00344	-1.15099				OSBP2	1	1	1	0.498553	0.866671	0.859783	1	1	1	0.9074	1.34437	0.952096	1	1	1	1.56703	1.49085	0.993744
		-1.17869	-0.966901	-1.14802				SLC38A1	1	1	1	0.629427	0.875979	0.910756	1	1	1	1.01732	1.47804	1.02704	1	1	1	1.37298	1.62014	0.941036
		-1.20897	-0.93621	-1.12846				PTP4A1	1	1	1	0.691487	1.10349	0.83334	1	1	1	0.859953	0.891813	1.04109	1	1	1	1.36058	1.65548	1.13373
		-1.11561	-0.935597	-1.1169
		-1.1169	-0.91781	-1.11561
		-1.15099	-0.907519	-1.10747				Dunnett's multiple comparisons test	Summary	Adjusted P Value
		-1.10747	-0.902088	-1.09813
		-1.12846	-0.900754	-1.09715				LamB
		-1.08324	-0.889558	-1.08324				WT + TM vs. KO1 + TM	ns	>0.9999
		-1.09715	-0.884643	-1.07015				WT + TM vs. KO2 +TM	ns	>0.9999
		-1.07015	-0.880949	-1.07007
		-1.06575	-0.864534	-1.06575				SLC7A11
		-1.046	-0.859603	-1.06482				WT + TM vs. KO1 + TM	ns	0.7703
		-1.04064	-0.85921	-1.06024				WT + TM vs. KO2 +TM	ns	0.5976
		-1.0478	-0.845444	-1.05517
		-1.07007	-0.835946	-1.05181				QTRT2
		-1.05517	-0.832166	-1.0478				WT + TM vs. KO1 + TM	ns	0.3185
		-1.09813	-0.828722	-1.046				WT + TM vs. KO2 +TM	ns	0.2538
		-1.02607	-0.828167	-1.04371
		-1.04559	-0.826605	-1.04064				CNOT1
		-1.06024	-0.826182	-1.0305				WT + TM vs. KO1 + TM	ns	0.3907
		-1.05181	-0.81665	-1.02946				WT + TM vs. KO2 +TM	ns	0.167
		-1.02731	-0.815403	-1.02905
		-1.02946	-0.81222	-1.02731				IQGAP1
		-1.00853	-0.810369	-1.02607				WT + TM vs. KO1 + TM	ns	0.746
		-1.02905	-0.806627	-1.01229				WT + TM vs. KO2 +TM	ns	0.192
		-1.00344	-0.805536	-1.00853
		-1.00792	-0.805322	-1.00792				ARHGAP11A
		-1.15508	-0.800408	-1.00344				WT + TM vs. KO1 + TM	ns	0.4561
		-1.06482	-0.798351	-0.991845				WT + TM vs. KO2 +TM	ns	0.5731
		-1.0305	-0.797309	-0.97365
		-1.04371	-0.797201	-0.966901				POLR3E
		-1.01285	-0.795007	-0.957611				WT + TM vs. KO1 + TM	ns	0.854
		-1.01826	-0.793748	-0.955211				WT + TM vs. KO2 +TM	ns	0.458
		-0.946306	-0.792851	-0.951381
		-0.957611	-0.780845	-0.948218				PNPLA8
		-0.991845	-0.774465	-0.947353				WT + TM vs. KO1 + TM	ns	0.9982
		-1.01229	-0.773488	-0.946306				WT + TM vs. KO2 +TM	ns	0.1198
		-0.966901	-0.771419	-0.943671
		-0.937404	-0.769936	-0.943466				ACTN4
		-0.947353	-0.76981	-0.937404				WT + TM vs. KO1 + TM	ns	0.9729
		-0.935597	-0.769136	-0.93621				WT + TM vs. KO2 +TM	ns	0.4805
		-0.948218	-0.768769	-0.935597
		-0.951381	-0.768299	-0.931349				OSBP2
		-0.97365	-0.761872	-0.926182				WT + TM vs. KO1 + TM	ns	0.3167
		-0.906605	-0.7609	-0.91781				WT + TM vs. KO2 +TM	*	0.0296
		-0.901887	-0.759979	-0.907519
		-0.897025	-0.759099	-0.907159				SLC38A1
		-0.900754	-0.757602	-0.906605				WT + TM vs. KO1 + TM	ns	0.2376
		-0.864534	-0.756447	-0.904759				WT + TM vs. KO2 +TM	ns	0.0791
		-0.91501	-0.752197	-0.902088
		-0.907159	-0.749267	-0.901887				PTP4A1
		-0.943671	-0.74602	-0.900754				WT + TM vs. KO1 + TM	ns	0.9644
		-0.93621	-0.74448	-0.897305				WT + TM vs. KO2 +TM	ns	0.0783
		-0.886144	-0.744135	-0.897025
		-0.897305	-0.742883	-0.892552
		-0.889558	-0.741094	-0.889558
		-0.884643	-0.739552	-0.886144
		-0.904759	-0.738359	-0.884643
		-0.943466	-0.738132	-0.880949
		-0.931349	-0.734859	-0.880427
		-0.91781	-0.734016	-0.873049
		-0.845444	-0.732715	-0.865715
		-0.902088	-0.731682	-0.865205
		-0.859799	-0.730875	-0.864537
		-0.855463	-0.727857	-0.864534
		-0.955211	-0.726568	-0.859799
		-0.859603	-0.723151	-0.859603
		-0.85921	-0.716307	-0.85921
		-0.880949	-0.712151	-0.855618
		-0.926182	-0.70952	-0.855463
		-0.855618	-0.704919	-0.845444
		-0.792669	-0.703743	-0.839235
		-0.822813	-0.701518	-0.835946
		-0.826605	-0.700619	-0.832166
		-0.827358	-0.698971	-0.82985
		-0.835946	-0.698714	-0.828722
		-0.839235	-0.698196	-0.828167
		-0.805536	-0.693942	-0.827358
		-0.793748	-0.690016	-0.826605
		-0.821832	-0.688309	-0.826182
		-0.800408	-0.683265	-0.822813
		-0.864537	-0.682212	-0.82254
		-0.81314	-0.681225	-0.821832
		-0.873049	-0.674511	-0.81665
		-0.82985	-0.674427	-0.815403
		-0.828167	-0.673712	-0.81314
		-0.865205	-0.672675	-0.812735
		-0.880427	-0.665901	-0.81222
		-0.892552	-0.663535	-0.810369
		-0.826182	-0.660653	-0.806627
		-0.800647	-0.660169	-0.805536
		-0.791321	-0.659984	-0.805322
		-0.907519	-0.659931	-0.800647
		-0.797309	-0.659652	-0.800408
		-0.828722	-0.65746	-0.799037
		-0.78019	-0.656255	-0.798351
		-0.795007	-0.655194	-0.797201
		-0.865715	-0.654046	-0.795007
		-0.815403	-0.652469	-0.793748
		-0.806627	-0.652091	-0.792851
		-0.770752	-0.650583	-0.791321
		-0.81222	-0.65058	-0.7852
		-0.773544	-0.648383	-0.780845
		-0.832166	-0.646808	-0.776072
		-0.776072	-0.646438	-0.775223
		-0.758018	-0.646358	-0.774465
		-0.765956	-0.646151	-0.773544
		-0.773488	-0.643071	-0.773488
		-0.77889	-0.642713	-0.773474
		-0.771419	-0.642681	-0.771419
		-0.767524	-0.641555	-0.770752
		-0.758067	-0.641493	-0.769936
		-0.797201	-0.640869	-0.76981
		-0.7609	-0.640625	-0.769136
		-0.82254	-0.640351	-0.768769
		-0.775223	-0.638697	-0.768299
		-0.756576	-0.638621	-0.767524
		-0.76071	-0.636562	-0.766359
		-0.769936	-0.635435	-0.765956
		-0.780845	-0.635203	-0.761872
		-0.805322	-0.634949	-0.7609
		-0.798351	-0.631548	-0.76071
		-0.756447	-0.63134	-0.759979
		-0.757947	-0.629366	-0.759099
		-0.799037	-0.629287	-0.758067
		-0.732715	-0.626965	-0.758018
		-0.792851	-0.625592	-0.757959
		-0.757959	-0.624713	-0.757947
		-0.74602	-0.623954	-0.757602
		-0.773474	-0.623649	-0.756576
		-0.731508	-0.623464	-0.756447
		-0.812735	-0.622976	-0.752197
		-0.752197	-0.618878	-0.751276
		-0.727857	-0.618582	-0.749267
		-0.769136	-0.61505	-0.747618
		-0.749267	-0.614008	-0.74602
		-0.76981	-0.612684	-0.74544
		-0.723151	-0.611125	-0.744465
		-0.703556	-0.610776	-0.744135
		-0.731591	-0.609561	-0.743238
		-0.704919	-0.608528	-0.742883
		-0.716724	-0.60816	-0.741289
		-0.708556	-0.607699	-0.741094
		-0.759099	-0.606845	-0.740351
		-0.740351	-0.603686	-0.739552
		-0.731682	-0.603174	-0.738359
		-0.768299	-0.602985	-0.738132
		-0.768769	-0.601591	-0.734859
		-0.757602	-0.600711	-0.734016
		-0.74544	-0.599362	-0.732715
		-0.738132	-0.599143	-0.731682
		-0.741289	-0.598516	-0.731508
		-0.712151	-0.597735	-0.730875
		-0.741094	-0.595751	-0.727857
		-0.739552	-0.592947	-0.726568
		-0.74448	-0.591938	-0.725736
		-0.774465	-0.590695	-0.723151
		-0.759979	-0.589636	-0.721125
		-0.706448	-0.589561	-0.716724
		-0.714384	-0.589514	-0.716307
		-0.698158	-0.587141	-0.714384
		-0.738359	-0.587005	-0.712151
		-0.703743	-0.585443	-0.70952
		-0.725736	-0.582073	-0.706631
		-0.698971	-0.582047	-0.706448
		-0.742883	-0.580799	-0.705326
		-0.69657	-0.579618	-0.704919
		-0.734859	-0.579336	-0.703743
		-0.761872	-0.578098	-0.703556
		-0.810369	-0.577486	-0.702366
		-0.698714	-0.577307	-0.70216
		-0.683419	-0.57729	-0.701518
		-0.7189	-0.577003	-0.700619
		-0.705326	-0.57628	-0.700579
		-0.694812	-0.576015	-0.700333
		-0.7852	-0.575585	-0.698971
		-0.701518	-0.574147	-0.698714
		-0.693942	-0.573436	-0.698196
		-0.734016	-0.57301	-0.698158
		-0.744135	-0.570299	-0.697547
		-0.766359	-0.568404	-0.69657
		-0.660169	-0.568205	-0.696237
		-0.721125	-0.568173	-0.695116
		-0.682212	-0.567357	-0.694812
		-0.697547	-0.56629	-0.693942
		-0.706631	-0.566184	-0.693184
		-0.747618	-0.563427	-0.693007
		-0.695116	-0.563334	-0.692836
		-0.716307	-0.563204	-0.690016
		-0.659984	-0.562688	-0.689316
		-0.681225	-0.562258	-0.688309
		-0.679521	-0.561886	-0.687976
		-0.700619	-0.561148	-0.683419
		-0.709694	-0.5601	-0.683343
		-0.679779	-0.559848	-0.683265
		-0.656614	-0.55717	-0.682212
		-0.681892	-0.557084	-0.681892
		-0.689316	-0.556645	-0.681225
		-0.690016	-0.553772	-0.680166
		-0.81665	-0.553769	-0.679779
		-0.67758	-0.553681	-0.679521
		-0.730875	-0.553469	-0.679092
		-0.673185	-0.553303	-0.67758
		-0.698196	-0.552981	-0.676955
		-0.676863	-0.55282	-0.676863
		-0.672675	-0.551131	-0.676458
		-0.641132	-0.551126	-0.676314
		-0.743238	-0.550667	-0.674608
		-0.659652	-0.549209	-0.674511
		-0.655753	-0.548499	-0.674427
		-0.744465	-0.545828	-0.673712
		-0.683265	-0.545355	-0.673185
		-0.676314	-0.543312	-0.672675
		-0.676955	-0.542022	-0.671927
		-0.70952	-0.54167	-0.67077
		-0.700579	-0.540976	-0.669001
		-0.673712	-0.538762	-0.668366
		-0.668366	-0.537845	-0.666292
		-0.649265	-0.537009	-0.665901
		-0.641493	-0.53667	-0.665811
		-0.702366	-0.535654	-0.66551
		-0.663163	-0.533926	-0.664006
		-0.696237	-0.533488	-0.663783
		-0.621869	-0.533129	-0.663535
		-0.726568	-0.532732	-0.663163
		-0.679092	-0.531853	-0.661774
		-0.654046	-0.531636	-0.661749
		-0.674608	-0.530954	-0.661036
		-0.64267	-0.530649	-0.660653
		-0.660012	-0.530119	-0.660169
		-0.629427	-0.529911	-0.660012
		-0.70216	-0.528644	-0.659984
		-0.656255	-0.527571	-0.659931
		-0.652469	-0.527137	-0.659652
		-0.680166	-0.526621	-0.658251
		-0.665901	-0.526571	-0.65746
		-0.665811	-0.526465	-0.656614
		-0.632074	-0.526368	-0.656255
		-0.629287	-0.526173	-0.655753
		-0.668649	-0.525873	-0.655194
		-0.683343	-0.525707	-0.654046
		-0.652091	-0.524113	-0.652469
		-0.661036	-0.523674	-0.652091
		-0.648511	-0.523026	-0.651615
		-0.65746	-0.521807	-0.650583
		-0.648029	-0.520439	-0.65058
		-0.655194	-0.520286	-0.649265
		-0.693007	-0.518021	-0.648511
		-0.663535	-0.51682	-0.648383
		-0.642279	-0.515588	-0.648029
		-0.609561	-0.511612	-0.646808
		-0.640351	-0.5114	-0.646739
		-0.625712	-0.511158	-0.646438
		-0.666292	-0.511008	-0.646358
		-0.635203	-0.50984	-0.646151
		-0.751276	-0.509695	-0.645516
		-0.634813	-0.509069	-0.645345
		-0.61505	-0.508888	-0.645245
		-0.617618	-0.508725	-0.643071
		-0.688309	-0.508637	-0.642713
		-0.633594	-0.508105	-0.642681
		-0.624556	-0.506835	-0.642279
		-0.645586	-0.506696	-0.642017
		-0.658251	-0.506482	-0.641555
		-0.67077	-0.505716	-0.641493
		-0.613091	-0.505655	-0.641132
		-0.69167	-0.5048	-0.640869
		-0.688091	-0.504014	-0.640625
		-0.640625	-0.50332	-0.640351
		-0.700333	-0.503154	-0.638778
		-0.621416	-0.503043	-0.638697
		-0.661749	-0.502272	-0.638621
		-0.625806	-0.501276	-0.638165
		-0.623649	-0.499896	-0.637024
		-0.638697	-0.499583	-0.636562
		-0.646358	-0.499455	-0.635435
		-0.638165	-0.49908	-0.635265
		-0.674427	-0.498961	-0.635203
		-0.621575	-0.498643	-0.634949
		-0.676458	-0.497148	-0.634813
		-0.622976	-0.496702	-0.632074
		-0.671927	-0.496324	-0.631548
		-0.582643	-0.496095	-0.63134
		-0.669001	-0.4958	-0.629957
		-0.616709	-0.494662	-0.629427
		-0.616597	-0.493844	-0.629366
		-0.66551	-0.493008	-0.629287
		-0.650583	-0.490951	-0.628857
		-0.642713	-0.490915	-0.627927
		-0.65058	-0.490115	-0.626965
		-0.628857	-0.490063	-0.625914
		-0.623464	-0.489338	-0.625712
		-0.660653	-0.488983	-0.625592
		-0.638621	-0.488379	-0.624713
		-0.606845	-0.487948	-0.624556
		-0.590695	-0.487796	-0.623954
		-0.659931	-0.486435	-0.623649
		-0.608874	-0.486043	-0.623464
		-0.637024	-0.485873	-0.622976
		-0.615904	-0.4848	-0.621869
		-0.623954	-0.483485	-0.621575
		-0.651615	-0.483057	-0.621416
		-0.638778	-0.482866	-0.6207
		-0.674511	-0.482516	-0.619795
		-0.589636	-0.482166	-0.618878
		-0.661774	-0.481981	-0.618582
		-0.589164	-0.481678	-0.617618
		-0.647163	-0.480471	-0.616709
		-0.600711	-0.480236	-0.616597
		-0.619795	-0.479232	-0.615904
		-0.586857	-0.478995	-0.61505
		-0.595751	-0.478698	-0.615024
		-0.646438	-0.478325	-0.614008
		-0.575585	-0.478264	-0.613436
		-0.607109	-0.477129	-0.612684
		-0.643071	-0.476995	-0.611125
		-0.608528	-0.476877	-0.610776
		-0.589561	-0.476688	-0.610494
		-0.687976	-0.475723	-0.61003
		-0.625914	-0.475484	-0.609561
		-0.582047	-0.475287	-0.608874
		-0.606193	-0.475145	-0.608528
		-0.642017	-0.475062	-0.60816
		-0.646808	-0.473334	-0.607872
		-0.642681	-0.472791	-0.607699
		-0.601404	-0.472669	-0.607512
		-0.607512	-0.472463	-0.607109
		-0.557189	-0.472213	-0.606845
		-0.615024	-0.468704	-0.606681
		-0.602985	-0.468164	-0.603686
		-0.651285	-0.467463	-0.603174
		-0.592997	-0.467152	-0.602985
		-0.601166	-0.466645	-0.602665
		-0.610542	-0.466441	-0.601938
		-0.558449	-0.465971	-0.601591
		-0.60816	-0.465927	-0.601404
		-0.57729	-0.46568	-0.601166
		-0.663783	-0.46507	-0.600711
		-0.645345	-0.46504	-0.600698
		-0.598388	-0.46487	-0.600367
		-0.693184	-0.464637	-0.599362
		-0.573099	-0.464231	-0.599143
		-0.579336	-0.463494	-0.59887
		-0.563885	-0.463465	-0.598516
		-0.585178	-0.462904	-0.598388
		-0.629957	-0.461539	-0.598196
		-0.569955	-0.461126	-0.597735
		-0.593345	-0.460432	-0.595751
		-0.626965	-0.460175	-0.594192
		-0.618878	-0.459924	-0.593345
		-0.664006	-0.459568	-0.593215
		-0.600698	-0.459458	-0.593162
		-0.59887	-0.458967	-0.592997
		-0.607872	-0.458521	-0.592947
		-0.577003	-0.458482	-0.592646
		-0.589514	-0.45583	-0.592314
		-0.603686	-0.455755	-0.592238
		-0.61003	-0.45574	-0.591938
		-0.641555	-0.455663	-0.591108
		-0.592646	-0.455401	-0.590695
		-0.552295	-0.455103	-0.589636
		-0.576015	-0.454785	-0.589561
		-0.628265	-0.454417	-0.589514
		-0.648383	-0.453821	-0.589164
		-0.592947	-0.45352	-0.589122
		-0.577926	-0.453487	-0.5885
		-0.63134	-0.452326	-0.587141
		-0.610494	-0.450926	-0.587005
		-0.658096	-0.450588	-0.58693
		-0.6207	-0.449833	-0.586857
		-0.646151	-0.449655	-0.585443
		-0.568205	-0.449527	-0.585178
		-0.556239	-0.449247	-0.584762
		-0.607699	-0.448951	-0.583814
		-0.527835	-0.448725	-0.582643
		-0.640626	-0.448414	-0.582073
		-0.567329	-0.447725	-0.582047
		-0.557084	-0.44738	-0.580799
		-0.634949	-0.447273	-0.579618
		-0.566856	-0.447202	-0.579558
		-0.584985	-0.446564	-0.579336
		-0.692836	-0.44655	-0.578098
		-0.562688	-0.44638	-0.577926
		-0.597735	-0.446007	-0.577486
		-0.629366	-0.444909	-0.577307
		-0.603174	-0.444501	-0.57729
		-0.570299	-0.44448	-0.577003
		-0.579558	-0.444473	-0.57628
		-0.559352	-0.444384	-0.576015
		-0.593162	-0.443358	-0.575585
		-0.631548	-0.443104	-0.575483
		-0.587141	-0.442744	-0.574453
		-0.559263	-0.44235	-0.574147
		-0.601591	-0.440977	-0.573436
		-0.544388	-0.440479	-0.573099
		-0.618582	-0.439306	-0.57301
		-0.550667	-0.439051	-0.572104
		-0.57084	-0.438567	-0.57099
		-0.545828	-0.436915	-0.57084
		-0.581363	-0.436614	-0.570299
		-0.562783	-0.436592	-0.569955
		-0.613436	-0.435539	-0.568404
		-0.544963	-0.435423	-0.568205
		-0.511811	-0.435013	-0.568173
		-0.559709	-0.43499	-0.567357
		-0.566441	-0.434726	-0.567329
		-0.560718	-0.434657	-0.566441
		-0.575483	-0.434335	-0.56629
		-0.587005	-0.433546	-0.566184
		-0.568404	-0.433139	-0.563885
		-0.56629	-0.432963	-0.563427
		-0.568173	-0.432377	-0.563334
		-0.598516	-0.431936	-0.563204
		-0.563427	-0.431243	-0.562783
		-0.561988	-0.42986	-0.562688
		-0.556645	-0.42986	-0.562433
		-0.561148	-0.428732	-0.562258
		-0.635265	-0.428365	-0.561886
		-0.511765	-0.428253	-0.561148
		-0.599362	-0.42767	-0.560849
		-0.54387	-0.426802	-0.560553
		-0.541595	-0.426351	-0.560359
		-0.567357	-0.426046	-0.5601
		-0.589122	-0.425493	-0.559923
		-0.584762	-0.425297	-0.559848
		-0.625592	-0.425275	-0.559709
		-0.538762	-0.425044	-0.559352
		-0.515344	-0.424908	-0.559263
		-0.533658	-0.424687	-0.558449
		-0.548499	-0.42448	-0.55717
		-0.611125	-0.424475	-0.557084
		-0.532579	-0.42344	-0.556645
		-0.591108	-0.423125	-0.556604
		-0.578098	-0.42299	-0.556239
		-0.599143	-0.422543	-0.55417
		-0.567837	-0.422313	-0.553772
		-0.525873	-0.421595	-0.553769
		-0.560553	-0.421348	-0.553681
		-0.612684	-0.421027	-0.553469
		-0.582073	-0.420439	-0.5534
		-0.526571	-0.420343	-0.553303
		-0.645245	-0.419989	-0.552981
		-0.541254	-0.419705	-0.55282
		-0.610776	-0.419513	-0.552649
		-0.563204	-0.419511	-0.552295
		-0.640869	-0.418982	-0.551812
		-0.509451	-0.418872	-0.551625
		-0.545035	-0.417307	-0.551379
		-0.602665	-0.417195	-0.551131
		-0.551131	-0.415962	-0.551126
		-0.57099	-0.415808	-0.550667
		-0.518895	-0.415581	-0.550168
		-0.566184	-0.414982	-0.549608
		-0.601938	-0.41451	-0.549448
		-0.594136	-0.414497	-0.549209
		-0.535654	-0.413895	-0.548499
		-0.5534	-0.413679	-0.547603
		-0.591938	-0.413478	-0.546643
		-0.538399	-0.413368	-0.545828
		-0.54167	-0.413349	-0.545449
		-0.58693	-0.413333	-0.545363
		-0.635435	-0.413311	-0.545355
		-0.532732	-0.412686	-0.545035
		-0.553303	-0.412487	-0.544963
		-0.562258	-0.412135	-0.544817
		-0.553681	-0.41202	-0.544388
		-0.524651	-0.411313	-0.543457
		-0.55282	-0.411311	-0.543312
		-0.546643	-0.411139	-0.543308
		-0.530649	-0.410998	-0.542902
		-0.572104	-0.410375	-0.542772
		-0.553772	-0.410146	-0.542022
		-0.553769	-0.410061	-0.54167
		-0.503379	-0.41004	-0.541595
		-0.516999	-0.409713	-0.541254
		-0.551379	-0.409549	-0.540976
		-0.553469	-0.409166	-0.540272
		-0.553612	-0.409018	-0.54019
		-0.593215	-0.408426	-0.54007
		-0.527692	-0.407801	-0.538762
		-0.627927	-0.406776	-0.538404
		-0.606681	-0.406702	-0.538399
		-0.523891	-0.405991	-0.537845
		-0.519753	-0.405594	-0.537761
		-0.545355	-0.405236	-0.537091
		-0.542902	-0.40418	-0.537089
		-0.557488	-0.404126	-0.537009
		-0.542772	-0.403823	-0.53667
		-0.624713	-0.403457	-0.535654
		-0.562433	-0.403236	-0.535285
		-0.5601	-0.403228	-0.535039
		-0.559848	-0.403223	-0.534789
		-0.5885	-0.403069	-0.5344
		-0.614008	-0.402969	-0.534092
		-0.527218	-0.402698	-0.533926
		-0.559923	-0.402124	-0.533488
		-0.574147	-0.401874	-0.5334
		-0.594192	-0.401624	-0.533129
		-0.549209	-0.401273	-0.532732
		-0.534789	-0.401271	-0.532579
		-0.551812	-0.401089	-0.531853
		-0.552981	-0.400199	-0.531636
		-0.600367	-0.399929	-0.530954
		-0.523674	-0.399316	-0.530649
		-0.574453	-0.399074	-0.530165
		-0.581646	-0.399015	-0.530119
		-0.540976	-0.398485	-0.529911
		-0.537761	-0.39773	-0.529397
		-0.50332	-0.397504	-0.528753
		-0.542022	-0.397361	-0.528647
		-0.592314	-0.397264	-0.528644
		-0.583814	-0.396498	-0.528427
		-0.549448	-0.396425	-0.527962
		-0.544817	-0.396315	-0.527845
		-0.514692	-0.396134	-0.527835
		-0.57301	-0.395417	-0.527692
		-0.592238	-0.394989	-0.527571
		-0.540272	-0.394756	-0.527426
		-0.636562	-0.394703	-0.527137
		-0.53667	-0.393672	-0.526621
		-0.546822	-0.393465	-0.52658
		-0.524113	-0.393463	-0.526571
		-0.501624	-0.391836	-0.526465
		-0.533488	-0.391632	-0.526368
		-0.526368	-0.39073	-0.526173
		-0.573348	-0.390686	-0.525961
		-0.573436	-0.390474	-0.525873
		-0.537089	-0.390124	-0.525787
		-0.580799	-0.390043	-0.525707
		-0.510018	-0.389903	-0.524567
		-0.577307	-0.389524	-0.524404
		-0.545449	-0.388263	-0.524113
		-0.551126	-0.388239	-0.523891
		-0.505325	-0.387888	-0.523674
		-0.521538	-0.387479	-0.523026
		-0.527962	-0.386928	-0.522502
		-0.531487	-0.386653	-0.521807
		-0.531636	-0.386195	-0.521538
		-0.54019	-0.385439	-0.520771
		-0.577486	-0.384881	-0.520439
		-0.511974	-0.38396	-0.520399
		-0.646739	-0.383889	-0.520286
		-0.502272	-0.38374	-0.519753
		-0.505213	-0.383628	-0.518895
		-0.585443	-0.383261	-0.518021
		-0.526173	-0.383247	-0.516999
		-0.560359	-0.382739	-0.51682
		-0.508457	-0.382383	-0.51612
		-0.537369	-0.382383	-0.516026
		-0.489921	-0.382306	-0.515588
		-0.474157	-0.382237	-0.515344
		-0.511997	-0.382104	-0.515154
		-0.5114	-0.381907	-0.513818
		-0.525707	-0.381624	-0.512791
		-0.552649	-0.381593	-0.511997
		-0.533926	-0.3814	-0.511974
		-0.520286	-0.381297	-0.511811
		-0.54007	-0.38098	-0.511765
		-0.538404	-0.380961	-0.511612
		-0.5344	-0.380544	-0.5114
		-0.5334	-0.380185	-0.511158
		-0.488182	-0.379889	-0.511008
		-0.551625	-0.379804	-0.510722
		-0.524567	-0.379305	-0.510112
		-0.483579	-0.378982	-0.510018
		-0.556604	-0.378947	-0.50989
		-0.513818	-0.378739	-0.50984
		-0.523026	-0.378486	-0.509695
		-0.497519	-0.37848	-0.509451
		-0.525787	-0.377346	-0.509232
		-0.534092	-0.377327	-0.509069
		-0.497631	-0.377282	-0.508938
		-0.510112	-0.377142	-0.508888
		-0.498855	-0.377032	-0.508827
		-0.530119	-0.376751	-0.508725
		-0.477564	-0.376685	-0.508637
		-0.472213	-0.376418	-0.508178
		-0.51682	-0.376329	-0.508105
		-0.545739	-0.375946	-0.507154
		-0.493008	-0.37571	-0.506835
		-0.499896	-0.375165	-0.506696
		-0.498961	-0.374944	-0.506482
		-0.522502	-0.374391	-0.506404
		-0.520399	-0.374279	-0.505716
		-0.45327	-0.373866	-0.505692
		-0.502045	-0.373692	-0.505655
		-0.543457	-0.37367	-0.505325
		-0.508827	-0.3735	-0.505213
		-0.461166	-0.373077	-0.5048
		-0.545363	-0.372714	-0.504746
		-0.511984	-0.372466	-0.504491
		-0.485731	-0.372127	-0.504014
		-0.50351	-0.371897	-0.503866
		-0.55417	-0.371723	-0.50351
		-0.560849	-0.371613	-0.503379
		-0.497148	-0.371556	-0.50332
		-0.511158	-0.370704	-0.503154
		-0.474475	-0.370698	-0.503043
		-0.505655	-0.37019	-0.502291
		-0.504014	-0.369881	-0.502272
		-0.524404	-0.369774	-0.502045
		-0.55717	-0.369485	-0.501811
		-0.482936	-0.369333	-0.501624
		-0.492012	-0.368123	-0.501276
		-0.533129	-0.367883	-0.500831
		-0.49986	-0.367352	-0.499896
		-0.508178	-0.36724	-0.49986
		-0.481689	-0.365991	-0.499583
		-0.499583	-0.365874	-0.499455
		-0.535039	-0.365365	-0.49908
		-0.469788	-0.365191	-0.499036
		-0.543312	-0.365078	-0.498961
		-0.494378	-0.36454	-0.498855
		-0.503866	-0.364533	-0.498835
		-0.454392	-0.364481	-0.498643
		-0.527845	-0.364081	-0.497975
		-0.518021	-0.364029	-0.497631
		-0.483485	-0.363989	-0.497148
		-0.490115	-0.363414	-0.497146
		-0.511008	-0.363329	-0.496702
		-0.471746	-0.363288	-0.496565
		-0.497146	-0.362989	-0.496324
		-0.547603	-0.362867	-0.496095
		-0.482042	-0.362792	-0.4958
		-0.561886	-0.362734	-0.495692
		-0.458342	-0.362245	-0.494662
		-0.4848	-0.361613	-0.494378
		-0.471434	-0.361439	-0.493844
		-0.645516	-0.361354	-0.493435
		-0.459924	-0.360663	-0.493008
		-0.512791	-0.359617	-0.492012
		-0.579618	-0.359088	-0.491642
		-0.478698	-0.358995	-0.491325
		-0.531853	-0.35897	-0.490951
		-0.464264	-0.358295	-0.490915
		-0.473334	-0.358129	-0.490115
		-0.475485	-0.358115	-0.490063
		-0.456753	-0.358056	-0.489921
		-0.516822	-0.357662	-0.489633
		-0.489468	-0.356612	-0.489468
		-0.419511	-0.356528	-0.489338
		-0.497975	-0.35631	-0.488983
		-0.491325	-0.355704	-0.488379
		-0.468391	-0.35567	-0.488182
		-0.598196	-0.354932	-0.487948
		-0.46568	-0.354461	-0.487796
		-0.503154	-0.353198	-0.487599
		-0.530954	-0.35298	-0.487566
		-0.453487	-0.352425	-0.487154
		-0.444501	-0.352421	-0.486587
		-0.463726	-0.352387	-0.486435
		-0.467757	-0.352173	-0.486422
		-0.478264	-0.351921	-0.486043
		-0.520439	-0.351758	-0.485873
		-0.438197	-0.351629	-0.485311
		-0.534964	-0.350769	-0.4848
		-0.490063	-0.350434	-0.483732
		-0.521807	-0.350216	-0.483579
		-0.500831	-0.349955	-0.483485
		-0.481981	-0.349917	-0.483057
		-0.504491	-0.349365	-0.482936
		-0.493435	-0.349335	-0.482866
		-0.481837	-0.349318	-0.482826
		-0.563334	-0.34919	-0.482631
		-0.498643	-0.348908	-0.482516
		-0.528753	-0.348542	-0.482166
		-0.528647	-0.348372	-0.481981
		-0.499455	-0.348363	-0.481837
		-0.475062	-0.34753	-0.481689
		-0.527571	-0.347505	-0.481678
		-0.537009	-0.347027	-0.480935
		-0.530165	-0.346999	-0.480471
		-0.482826	-0.346778	-0.480236
		-0.475723	-0.346687	-0.480136
		-0.527137	-0.346227	-0.480058
		-0.449833	-0.346158	-0.479779
		-0.454417	-0.345984	-0.479232
		-0.57628	-0.345982	-0.478995
		-0.508637	-0.345813	-0.478698
		-0.475255	-0.345685	-0.478325
		-0.51612	-0.34567	-0.478264
		-0.475145	-0.344941	-0.478222
		-0.528644	-0.343428	-0.477649
		-0.496702	-0.342645	-0.477564
		-0.473324	-0.342577	-0.477129
		-0.487948	-0.341801	-0.477078
		-0.46487	-0.341659	-0.476995
		-0.481678	-0.341566	-0.476877
		-0.537845	-0.341244	-0.476688
		-0.468164	-0.341125	-0.475723
		-0.480058	-0.341065	-0.475485
		-0.458029	-0.340717	-0.475484
		-0.474164	-0.340561	-0.475375
		-0.528427	-0.339977	-0.475287
		-0.421595	-0.339743	-0.475255
		-0.491642	-0.339668	-0.475145
		-0.506404	-0.339423	-0.475062
		-0.475484	-0.338908	-0.474747
		-0.45583	-0.338702	-0.474475
		-0.480136	-0.338393	-0.474164
		-0.508938	-0.337792	-0.474157
		-0.46499	-0.337385	-0.473334
		-0.529397	-0.33735	-0.472893
		-0.474747	-0.336914	-0.472791
		-0.480236	-0.33679	-0.472669
		-0.475375	-0.336661	-0.472463
		-0.549608	-0.336519	-0.472213
		-0.527426	-0.336424	-0.471537
		-0.487796	-0.336389	-0.471434
		-0.487154	-0.335995	-0.471427
		-0.420744	-0.335544	-0.470678
		-0.486422	-0.335267	-0.47066
		-0.499036	-0.33521	-0.47046
		-0.44235	-0.334937	-0.470154
		-0.483732	-0.334585	-0.469788
		-0.488983	-0.333834	-0.469656
		-0.472791	-0.333792	-0.468704
		-0.47046	-0.33368	-0.468391
		-0.463465	-0.333627	-0.468164
		-0.461126	-0.33344	-0.468154
		-0.42344	-0.333263	-0.468037
		-0.480471	-0.332002	-0.46792
		-0.420989	-0.331858	-0.467891
		-0.485762	-0.331765	-0.467757
		-0.505716	-0.331484	-0.467697
		-0.466441	-0.330543	-0.467514
		-0.476877	-0.330352	-0.467463
		-0.537091	-0.330076	-0.46745
		-0.506696	-0.329948	-0.467152
		-0.482516	-0.329231	-0.46682
		-0.471427	-0.329038	-0.466645
		-0.489338	-0.327957	-0.466441
		-0.525961	-0.327856	-0.466293
		-0.441863	-0.327851	-0.465971
		-0.470678	-0.327638	-0.465927
		-0.452326	-0.326742	-0.465811
		-0.469272	-0.326404	-0.46568
		-0.494049	-0.325881	-0.46507
		-0.462352	-0.325867	-0.46504
		-0.45352	-0.325391	-0.46499
		-0.461171	-0.324404	-0.46487
		-0.478995	-0.323905	-0.464637
		-0.472463	-0.32376	-0.464264
		-0.490915	-0.323492	-0.464231
		-0.456305	-0.323394	-0.46423
		-0.480935	-0.323174	-0.464038
		-0.468154	-0.322619	-0.463726
		-0.461793	-0.322128	-0.463494
		-0.467697	-0.321684	-0.463465
		-0.455197	-0.321475	-0.462904
		-0.43038	-0.321179	-0.462352
		-0.464637	-0.321166	-0.461539
		-0.502291	-0.320938	-0.461171
		-0.489633	-0.320681	-0.461166
		-0.467463	-0.320503	-0.461126
		-0.442499	-0.320481	-0.460976
		-0.44423	-0.320192	-0.460775
		-0.486435	-0.319395	-0.460633
		-0.44655	-0.319192	-0.460432
		-0.507154	-0.318984	-0.460307
		-0.455663	-0.318853	-0.460175
		-0.447202	-0.318572	-0.459924
		-0.441797	-0.318516	-0.459568
		-0.454785	-0.318515	-0.459458
		-0.501811	-0.318458	-0.459196
		-0.46682	-0.318452	-0.458967
		-0.441657	-0.318181	-0.458705
		-0.486587	-0.317641	-0.458521
		-0.46504	-0.317583	-0.458482
		-0.506482	-0.317242	-0.458342
		-0.509069	-0.317017	-0.458309
		-0.466293	-0.317001	-0.458029
		-0.424908	-0.31682	-0.457998
		-0.482866	-0.316405	-0.45796
		-0.465811	-0.316352	-0.457925
		-0.469401	-0.315891	-0.457319
		-0.501276	-0.315705	-0.457099
		-0.479232	-0.314742	-0.456753
		-0.455401	-0.314495	-0.45583
		-0.439306	-0.313722	-0.455755
		-0.460307	-0.313543	-0.45574
		-0.515154	-0.313009	-0.455663
		-0.441818	-0.311845	-0.455401
		-0.441027	-0.311771	-0.455103
		-0.515588	-0.311309	-0.454785
		-0.456086	-0.311209	-0.454659
		-0.444753	-0.310387	-0.454417
		-0.498835	-0.310306	-0.454392
		-0.476775	-0.310248	-0.453821
		-0.496095	-0.310143	-0.45352
		-0.460976	-0.309639	-0.453487
		-0.427763	-0.309385	-0.45327
		-0.471537	-0.30933	-0.453138
		-0.543308	-0.309191	-0.452326
		-0.457319	-0.309013	-0.452109
		-0.435013	-0.30861	-0.450926
		-0.535285	-0.308527	-0.450707
		-0.4958	-0.308345	-0.450588
		-0.467152	-0.308075	-0.449894
		-0.49908	-0.307681	-0.449833
		-0.389133	-0.307664	-0.449763
		-0.550168	-0.307268	-0.449655
		-0.448414	-0.306542	-0.449527
		-0.438241	-0.306202	-0.449463
		-0.47066	-0.305983	-0.449247
		-0.425633	-0.305255	-0.449123
		-0.46423	-0.305103	-0.449048
		-0.476688	-0.304991	-0.448967
		-0.446564	-0.304703	-0.448951
		-0.485873	-0.304223	-0.448725
		-0.433139	-0.304126	-0.448707
		-0.43499	-0.303909	-0.448477
		-0.436614	-0.303826	-0.448414
		-0.460775	-0.30335	-0.44809
		-0.52658	-0.302955	-0.448083
		-0.488379	-0.302679	-0.448031
		-0.496324	-0.302671	-0.44785
		-0.5048	-0.302602	-0.447725
		-0.508888	-0.302535	-0.44738
		-0.419089	-0.302052	-0.447273
		-0.42299	-0.301921	-0.447202
		-0.460633	-0.301808	-0.44696
		-0.434247	-0.301665	-0.446669
		-0.439051	-0.301072	-0.446587
		-0.448477	-0.300734	-0.446564
		-0.450805	-0.300001	-0.44655
		-0.438022	-0.299542	-0.44638
		-0.443358	-0.299037	-0.446185
		-0.455755	-0.298755	-0.446128
		-0.439033	-0.298657	-0.446007
		-0.437335	-0.298567	-0.445224
		-0.448031	-0.298428	-0.445048
		-0.448924	-0.298226	-0.444909
		-0.415808	-0.298175	-0.444753
		-0.472893	-0.297751	-0.444501
		-0.425248	-0.29763	-0.44448
		-0.509232	-0.297497	-0.444473
		-0.526621	-0.297175	-0.444384
		-0.444909	-0.296443	-0.44423
		-0.406745	-0.296061	-0.443778
		-0.410146	-0.296055	-0.443358
		-0.393463	-0.295724	-0.443104
		-0.447725	-0.295681	-0.442744
		-0.468037	-0.295671	-0.442499
		-0.477129	-0.295621	-0.44249
		-0.449655	-0.294944	-0.44235
		-0.50989	-0.294923	-0.441818
		-0.44696	-0.294743	-0.441797
		-0.459196	-0.29431	-0.441657
		-0.438876	-0.294097	-0.441027
		-0.479779	-0.292702	-0.440977
		-0.459568	-0.292346	-0.440479
		-0.477078	-0.292282	-0.440063
		-0.426802	-0.292091	-0.439403
		-0.417195	-0.291675	-0.439306
		-0.457925	-0.291563	-0.439247
		-0.423236	-0.291528	-0.439051
		-0.430241	-0.291403	-0.439033
		-0.482166	-0.291282	-0.438968
		-0.434699	-0.291028	-0.438876
		-0.382739	-0.290968	-0.438567
		-0.468046	-0.290909	-0.438373
		-0.436592	-0.290637	-0.438246
		-0.420343	-0.290388	-0.438241
		-0.448967	-0.290314	-0.438022
		-0.465767	-0.290158	-0.437335
		-0.445262	-0.290123	-0.436915
		-0.529911	-0.290099	-0.436688
		-0.451711	-0.28974	-0.436672
		-0.449123	-0.289497	-0.436614
		-0.394756	-0.289227	-0.436592
		-0.426236	-0.289113	-0.436181
		-0.415581	-0.288741	-0.435539
		-0.398832	-0.288569	-0.435423
		-0.425493	-0.288547	-0.435319
		-0.475287	-0.288006	-0.435257
		-0.476995	-0.28717	-0.435246
		-0.427907	-0.286889	-0.435013
		-0.526465	-0.286451	-0.43499
		-0.44809	-0.286333	-0.434726
		-0.436688	-0.286314	-0.434699
		-0.464231	-0.286303	-0.434657
		-0.471101	-0.28586	-0.434335
		-0.45574	-0.285847	-0.434275
		-0.402698	-0.285819	-0.434247
		-0.42986	-0.285698	-0.433549
		-0.508725	-0.285503	-0.433546
		-0.458482	-0.285438	-0.433139
		-0.414046	-0.285345	-0.432963
		-0.385851	-0.285246	-0.432612
		-0.44249	-0.28492	-0.432377
		-0.415862	-0.284856	-0.431936
		-0.520771	-0.284072	-0.431596
		-0.414497	-0.284025	-0.431393
		-0.414552	-0.283963	-0.431243
		-0.419778	-0.283678	-0.431027
		-0.467514	-0.283261	-0.430831
		-0.4256	-0.282838	-0.430678
		-0.510722	-0.282714	-0.43038
		-0.466645	-0.282195	-0.430241
		-0.509695	-0.282041	-0.429948
		-0.409743	-0.281406	-0.42986
		-0.435246	-0.281204	-0.42986
		-0.431596	-0.281179	-0.428732
		-0.408426	-0.280709	-0.428421
		-0.506835	-0.280617	-0.428365
		-0.493844	-0.28026	-0.428253
		-0.448417	-0.280186	-0.428125
		-0.457998	-0.280136	-0.427932
		-0.426351	-0.280128	-0.427907
		-0.461539	-0.279992	-0.427763
		-0.434726	-0.279917	-0.42767
		-0.428365	-0.279753	-0.426802
		-0.419513	-0.279626	-0.426351
		-0.44738	-0.278668	-0.426277
		-0.44785	-0.278396	-0.426253
		-0.402969	-0.278347	-0.426236
		-0.440977	-0.278304	-0.426046
		-0.460432	-0.278303	-0.425633
		-0.41022	-0.278296	-0.4256
		-0.41419	-0.277684	-0.425493
		-0.449463	-0.277651	-0.425297
		-0.508105	-0.27754	-0.425275
		-0.472669	-0.277241	-0.425248
		-0.420862	-0.27699	-0.425044
		-0.428125	-0.276599	-0.424908
		-0.473657	-0.276201	-0.424687
		-0.496565	-0.276122	-0.42448
		-0.470154	-0.275794	-0.424475
		-0.410061	-0.274963	-0.424187
		-0.418033	-0.274803	-0.424055
		-0.485311	-0.274561	-0.423682
		-0.41888	-0.274296	-0.42344
		-0.431393	-0.27368	-0.423407
		-0.434275	-0.273587	-0.423236
		-0.46792	-0.273359	-0.423125
		-0.418021	-0.273255	-0.42299
		-0.444889	-0.27304	-0.422689
		-0.405636	-0.272907	-0.422543
		-0.432612	-0.272874	-0.422313
		-0.444384	-0.272178	-0.422285
		-0.45796	-0.272054	-0.421595
		-0.436672	-0.271693	-0.421424
		-0.440063	-0.271292	-0.421348
		-0.412322	-0.271175	-0.421027
		-0.434335	-0.271141	-0.420989
		-0.403069	-0.270967	-0.420862
		-0.503043	-0.270846	-0.420439
		-0.445224	-0.270219	-0.420343
		-0.428253	-0.270146	-0.420279
		-0.449527	-0.269872	-0.419989
		-0.417307	-0.26976	-0.419778
		-0.443104	-0.269402	-0.419705
		-0.424187	-0.269103	-0.419694
		-0.411313	-0.268833	-0.419513
		-0.459458	-0.268626	-0.419511
		-0.400595	-0.268368	-0.419409
		-0.425044	-0.268021	-0.418982
		-0.380128	-0.267793	-0.41888
		-0.459263	-0.267206	-0.418872
		-0.381911	-0.266827	-0.418033
		-0.409018	-0.266528	-0.418025
		-0.482631	-0.266457	-0.418021
		-0.440479	-0.266362	-0.417307
		-0.46745	-0.266148	-0.417195
		-0.490951	-0.265244	-0.416913
		-0.421027	-0.264803	-0.416862
		-0.401271	-0.264781	-0.416536
		-0.413184	-0.264512	-0.416045
		-0.405594	-0.264497	-0.415962
		-0.448693	-0.264335	-0.415862
		-0.39333	-0.264321	-0.415808
		-0.433546	-0.264154	-0.415739
		-0.492813	-0.264037	-0.415581
		-0.398663	-0.264026	-0.414982
		-0.419694	-0.263979	-0.414674
		-0.443717	-0.263792	-0.414552
		-0.439403	-0.263703	-0.41451
		-0.478325	-0.263424	-0.414497
		-0.375459	-0.263252	-0.414046
		-0.383889	-0.263102	-0.413895
		-0.435319	-0.262792	-0.413762
		-0.458521	-0.262725	-0.413679
		-0.399015	-0.262688	-0.413478
		-0.487599	-0.262621	-0.413368
		-0.452109	-0.262339	-0.413349
		-0.41451	-0.261738	-0.413333
		-0.379354	-0.260938	-0.413311
		-0.422543	-0.260655	-0.413184
		-0.402124	-0.260405	-0.412686
		-0.478222	-0.260375	-0.41262
		-0.449894	-0.259638	-0.412584
		-0.429948	-0.259509	-0.412487
		-0.505692	-0.259079	-0.412322
		-0.457099	-0.25884	-0.412272
		-0.460175	-0.258638	-0.412172
		-0.405063	-0.258428	-0.412155
		-0.391518	-0.258332	-0.412135
		-0.504746	-0.258271	-0.412081
		-0.389903	-0.257939	-0.41202
		-0.393845	-0.25782	-0.411313
		-0.445048	-0.257286	-0.411311
		-0.482134	-0.257125	-0.411169
		-0.443778	-0.256707	-0.411139
		-0.404076	-0.25657	-0.410998
		-0.41202	-0.256545	-0.410908
		-0.396598	-0.256507	-0.410838
		-0.455103	-0.256483	-0.410548
		-0.361127	-0.256422	-0.410375
		-0.404126	-0.256265	-0.41022
		-0.495692	-0.255727	-0.410146
		-0.386893	-0.255422	-0.410061
		-0.430831	-0.255402	-0.41004
		-0.380544	-0.255217	-0.409743
		-0.436915	-0.255205	-0.409713
		-0.384957	-0.255007	-0.409549
		-0.450588	-0.254932	-0.409399
		-0.397998	-0.25459	-0.409166
		-0.469656	-0.254541	-0.409018
		-0.465971	-0.254479	-0.408891
		-0.426253	-0.254344	-0.408782
		-0.468704	-0.25415	-0.407832
		-0.413333	-0.254088	-0.407801
		-0.436181	-0.254061	-0.407446
		-0.364845	-0.254035	-0.406776
		-0.427932	-0.253956	-0.406745
		-0.450926	-0.253927	-0.406702
		-0.418982	-0.253867	-0.406407
		-0.38318	-0.253793	-0.406175
		-0.516026	-0.253746	-0.405991
		-0.346432	-0.253728	-0.405691
		-0.467891	-0.253551	-0.405636
		-0.401386	-0.25335	-0.405594
		-0.414674	-0.253345	-0.405324
		-0.483057	-0.25322	-0.405282
		-0.390895	-0.253073	-0.405236
		-0.363414	-0.253069	-0.405063
		-0.446007	-0.252752	-0.404797
		-0.415739	-0.252609	-0.404512
		-0.416913	-0.252228	-0.404243
		-0.453821	-0.251717	-0.40418
		-0.37974	-0.251444	-0.404126
		-0.414982	-0.251147	-0.403823
		-0.409399	-0.251129	-0.403564
		-0.397361	-0.250875	-0.403457
		-0.379804	-0.250737	-0.403236
		-0.393172	-0.250621	-0.403228
		-0.39773	-0.250456	-0.403223
		-0.44638	-0.249729	-0.403069
		-0.385015	-0.249543	-0.402969
		-0.448083	-0.24949	-0.402698
		-0.377032	-0.249027	-0.402444
		-0.404797	-0.24884	-0.402124
		-0.50984	-0.248557	-0.401874
		-0.413762	-0.24846	-0.401624
		-0.444473	-0.248445	-0.40157
		-0.401273	-0.248365	-0.401386
		-0.390043	-0.248218	-0.401273
		-0.358149	-0.248206	-0.401271
		-0.385213	-0.247978	-0.401089
		-0.446394	-0.24782	-0.400687
		-0.383247	-0.247332	-0.400639
		-0.419705	-0.247204	-0.400595
		-0.410998	-0.247193	-0.400483
		-0.397506	-0.246789	-0.400467
		-0.406407	-0.246441	-0.400199
		-0.405691	-0.245899	-0.399929
		-0.428732	-0.24512	-0.399316
		-0.464038	-0.244797	-0.399133
		-0.327957	-0.244793	-0.399074
		-0.409166	-0.244596	-0.399015
		-0.405991	-0.244233	-0.398832
		-0.386136	-0.244217	-0.398701
		-0.369483	-0.244144	-0.398663
		-0.424055	-0.243504	-0.398485
		-0.487566	-0.242975	-0.39843
		-0.446185	-0.242939	-0.397998
		-0.387581	-0.242441	-0.397836
		-0.424475	-0.241994	-0.39773
		-0.447273	-0.241976	-0.397506
		-0.422285	-0.241783	-0.397504
		-0.373866	-0.241544	-0.397361
		-0.439247	-0.241527	-0.397338
		-0.396315	-0.241428	-0.397264
		-0.370155	-0.241111	-0.397047
		-0.381593	-0.241056	-0.396598
		-0.406702	-0.240766	-0.396498
		-0.423125	-0.240603	-0.396425
		-0.438968	-0.240182	-0.396315
		-0.382306	-0.240095	-0.396134
		-0.402444	-0.239753	-0.395417
		-0.382974	-0.239516	-0.395006
		-0.431027	-0.239078	-0.394989
		-0.37022	-0.23855	-0.394756
		-0.435257	-0.238477	-0.394703
		-0.424175	-0.23832	-0.393845
		-0.380185	-0.238304	-0.393672
		-0.412172	-0.238266	-0.393579
		-0.388239	-0.238179	-0.393465
		-0.392183	-0.23813	-0.393463
		-0.46507	-0.237804	-0.39333
		-0.445009	-0.237614	-0.393172
		-0.353105	-0.237118	-0.392856
		-0.387405	-0.237107	-0.392282
		-0.416862	-0.236973	-0.392183
		-0.420439	-0.236924	-0.392043
		-0.357923	-0.236868	-0.391889
		-0.349955	-0.236864	-0.391836
		-0.404243	-0.236835	-0.391632
		-0.401166	-0.236733	-0.391617
		-0.431243	-0.23617	-0.391518
		-0.445765	-0.235981	-0.390941
		-0.518999	-0.235388	-0.390895
		-0.370704	-0.23535	-0.39073
		-0.380558	-0.235337	-0.390686
		-0.458309	-0.235243	-0.390474
		-0.371897	-0.235003	-0.390124
		-0.388669	-0.234906	-0.390043
		-0.397264	-0.234175	-0.389903
		-0.369163	-0.233602	-0.389784
		-0.435539	-0.233503	-0.389619
		-0.416536	-0.232396	-0.389524
		-0.39843	-0.232242	-0.389133
		-0.450707	-0.231989	-0.389033
		-0.398485	-0.231975	-0.38896
		-0.432963	-0.231759	-0.388669
		-0.347321	-0.231555	-0.388263
[truncated: 4,857 more rows]

## Sheet: Fig.4 - fig. suppl. 4
		DMSO	TM
[truncated: 6 more rows]
